# Supplementary material for: Competing Pathways in O‐Arylations with Diaryliodonium Salts: Mechanistic Insights
Source: PubMed Central journal article supplement — Chemistry. 2017 Sep 5;23(53):13249–58. doi: 10.1002/chem.201703057 (PMC5639379; doi:10.1002/chem.201703057), 2017-09-05

# CHEMISTRY

## A **European** Journal

### Supporting Information

#### **Competing Pathways in O-Arylations with Diaryliodonium Salts: Mechanistic Insights**

Elin Stridfeldt<sup>+, [a]</sup> Erik Lindstedt<sup>+, [a]</sup> Marcus Reitti<sup>+, [a]</sup> Jan Blid,<sup>[a]</sup> Per-Ola Norrby,<sup>[b]</sup> and Berit Olofsson<sup>\*, [a]</sup>

chem\_201703057\_sm\_miscellaneous\_information.pdf

## Supporting Information

|                                                                                       |    |
|---------------------------------------------------------------------------------------|----|
| 1. General Experimental Procedure .....                                               | 3  |
| 2. Synthesis of Starting Materials .....                                              | 4  |
| 2.1. Synthesis of Diaryliodonium Salts <b>1</b> .....                                 | 4  |
| 2.2. Synthesis of Alcohols <b>3</b> .....                                             | 7  |
| 3. Arylation of Hydroxide.....                                                        | 9  |
| 3.1. Synthesis of Reference Diaryl Ethers .....                                       | 9  |
| 3.2. Initial Solvent Screening .....                                                  | 10 |
| 3.3. General Procedure for the Arylation of Hydroxides.....                           | 11 |
| 3.3.1. General Procedure A .....                                                      | 11 |
| 3.3.2. General Procedure B .....                                                      | 11 |
| 3.4. Arylations with Salt <b>1b</b> .....                                             | 12 |
| 3.4.1. Identification of By-Products .....                                            | 12 |
| 3.4.2. Trapping of Aryne with Furan .....                                             | 15 |
| 3.4.3. Trapping of Aryne with Piperidine.....                                         | 16 |
| 3.4.4. Comparison with and without Aryne Traps .....                                  | 16 |
| 3.5. Arylation with Salt <b>1c</b> .....                                              | 18 |
| 3.6. Arylation with Salt <b>1a</b> .....                                              | 19 |
| 3.7. Arylation with Salt <b>1d</b> .....                                              | 20 |
| 3.7.1. Identification of By-Products .....                                            | 20 |
| 3.7.2. Trapping of Benzyne with Furan.....                                            | 22 |
| 3.7.4. Trapping of Benzyne with Piperidine .....                                      | 24 |
| 3.7.5. Comparison with and without Aryne Traps .....                                  | 26 |
| 3.7.6. Addition of Another Aryl Iodide .....                                          | 27 |
| 3.7.7. Salt <b>1d</b> in H <sub>2</sub> O.....                                        | 28 |
| 3.9. Deuterium-Labeling Experiments .....                                             | 30 |
| 3.9.1. Salt <b>1d</b> in D <sub>2</sub> O without Trap .....                          | 30 |
| 3.9.2. Salt <b>1d-D</b> D <sub>2</sub> O with Trap .....                              | 31 |
| 3.9.3. Salt <b>1d-D</b> in CH <sub>2</sub> Cl <sub>2</sub> and H <sub>2</sub> O ..... | 32 |
| 4. Arylation of Primary Alcohol <b>3a</b> .....                                       | 33 |
| 4.1. General Procedure C.....                                                         | 33 |
| 4.2. Identification of By-Products.....                                               | 33 |
| 4.3. Trapping of Aryne with Furan.....                                                | 33 |
| 4.4. Trapping of Aryne with Piperidine .....                                          | 34 |
| 4.5. Comparison with and without Aryne Trap.....                                      | 35 |
| 4.6. Screening of Amines as Aryne Trap.....                                           | 35 |
| 4.7. Comparing with Published Protocol.....                                           | 36 |
| 4.8. Analytical Data for Arylation of Primary Alcohols .....                          | 37 |
| 4.9. Other Salts with 1-Pentanol .....                                                | 38 |
| 5. Arylation of Secondary Alcohols <b>3b</b> and <b>3b-D</b> .....                    | 39 |
| 5.1. General Procedure for Arylation of Secondary Alcohols .....                      | 39 |
| 5.1.1. General Procedure D.....                                                       | 39 |
| 5.1.2. General Procedure E .....                                                      | 39 |
| 5.2. Trapping of Benzyne with Furan .....                                             | 40 |
| 5.3. Effect of Radical Traps .....                                                    | 40 |
| 5.3.1. DPE in Toluene .....                                                           | 40 |
| 5.3.2. Reaction in THF.....                                                           | 40 |
| 5.3.3. DPE in THF .....                                                               | 41 |

|        |                                                                                                                                         |     |
|--------|-----------------------------------------------------------------------------------------------------------------------------------------|-----|
| 5.3.4. | TEMPO in THF .....                                                                                                                      | 41  |
| 5.4.   | Comparing Oxidation with Published Protocols .....                                                                                      | 41  |
| 5.4.1. | Reaction with Salt <b>1f</b> .....                                                                                                      | 41  |
| 5.4.2. | Reaction with Salt <b>1e</b> .....                                                                                                      | 42  |
| 5.4.3. | Reaction with Salt <b>1d</b> .....                                                                                                      | 42  |
| 5.5.   | Oxidation Mechanism with Salt <b>1e</b> .....                                                                                           | 42  |
| 5.6.   | Oxidation Mechanism with Salt <b>1e</b> and <b>3b-D</b> .....                                                                           | 43  |
| 5.7.   | Competition Experiments .....                                                                                                           | 43  |
| 5.8.   | Analytical Data for Arylation of Secondary Alcohols.....                                                                                | 44  |
| 6.     | Computational Details .....                                                                                                             | 47  |
| 7.     | Arylation of Hydroxide.....                                                                                                             | 48  |
| 7.1.   | Diphenyliodonium Triflate ( <b>1d</b> ) and Hydroxide in Toluene (M06-2X) ..                                                            | 48  |
| 7.2.   | Electronic Effects of Ar <sub>2</sub> IOTf with Hydroxide in Toluene (M06-2X) .....                                                     | 49  |
| 7.4.   | Solvation Effects of Ar <sub>2</sub> IOTf with Hydroxide (M06-2X) .....                                                                 | 50  |
| 7.5.   | Diphenyliodonium Triflate ( <b>1d</b> ) and Hydroxide in CH <sub>2</sub> Cl <sub>2</sub> and Water (B3LYP-D3).....                      | 51  |
| 7.6.   | <i>p</i> -Nitrophenyl(phenyl)iodonium Triflate ( <b>1a</b> ) and Hydroxide in CH <sub>2</sub> Cl <sub>2</sub> and Water (B3LYP-D3)..... | 52  |
| 7.7.   | Dianisylidonium Triflate ( <b>1c</b> ) and Hydroxide in CH <sub>2</sub> Cl <sub>2</sub> and Water (B3LYP-D3).....                       | 54  |
| 8.     | Arylation vs. Oxidation of Secondary Alcohol.....                                                                                       | 55  |
| 8.1.   | Diphenyliodonium Triflate ( <b>1d</b> ) and 1-Phenylethoxide in Toluene (B3LYP-D3 and M06-2X) .....                                     | 56  |
| 8.2.   | Dimesityliodonium Triflate ( <b>1e</b> ) and 1-Phenylethoxide in Toluene (B3LYP-D3 and M06-2X) .....                                    | 57  |
| 9.     | Selected Optimized Intermediates and Transition States .....                                                                            | 58  |
| 10.    | Cartesian Coordinates, Energies and Selected Vibrational Frequencies.....                                                               | 60  |
| 11.    | References .....                                                                                                                        | 109 |
| 12.    | Copies of <sup>1</sup> H and <sup>13</sup> C NMR .....                                                                                  | 110 |

## 1. General Experimental Procedure

All reactions were carried out without any precaution to avoid air or moisture unless otherwise stated. Toluene and THF were dried using VAC-purification system and then stored over activated 4Å molecular sieves. MeCN was dried using VAC-purification system. Pentane and anhydrous TBME were dried over activated 4Å molecular sieves. MeOH was used as received. The stabilizer in the CH<sub>2</sub>Cl<sub>2</sub> had an impact on the arylation reaction; wet CH<sub>2</sub>Cl<sub>2</sub> (*i.e.* CH<sub>2</sub>Cl<sub>2</sub> saturated with deionized H<sub>2</sub>O) stabilized with amylene should be used. CH<sub>2</sub>Cl<sub>2</sub> stabilized with EtOH (<0.2%) gave an undesired ether product, which was difficult to separate from the desired diaryl ether.

All reactants and reagents were purchased from commercial suppliers, except the diaryliodonium salts and the secondary alcohols, which were synthesized according to published procedures. NaOH was powdered and stored in a desiccator. *tert*-Butoxide bases, NaBH<sub>4</sub> and NaBD<sub>4</sub> were stored under argon atmosphere in a desiccator. *m*CPBA was dried under high vacuum for 3-4 hours and the percentage of active oxidant was determined using iodometric titration.<sup>[1]</sup> TfOH and BF<sub>3</sub>·OEt<sub>2</sub> were stored and handled under argon atmosphere using Hamilton syringes and oven-dried metal needles. For diaryliodonium salt synthesis CH<sub>2</sub>Cl<sub>2</sub> stabilized with EtOH (<0.2%) was used, except in the synthesis of 4-nitrophenyl-(phenyl)iodonium triflate that utilized CH<sub>2</sub>Cl<sub>2</sub> stabilized with amylene.

TLC analysis was performed on pre-coated silica gel 60 F<sub>254</sub> plates using either UV light, KMnO<sub>4</sub>, or Seebach's "magic" stain (a mixture of phosphormolybdic acid and Ce(SO<sub>4</sub>)<sub>2</sub>) together with heat as developing agent.<sup>[2]</sup> The crude products were purified by flash column chromatography using 40-60 μm, 60A silica gel as stationary phase or using automated flash system Teledyne ISCO CombiFlash Rf 200 with RediSep Rf columns.

GC-MS analyses were performed using a Shimadzu GC-2010 Plus gas chromatograph (column HP-5MS 30 m x 0.25 mm x 0.25 μm) connected to a GCMS-QP2020 mass spectrometer.

Melting points were measured using a STUART SMP3 and are reported uncorrected. All NMR spectra were recorded using a 400 MHz Bruker AVANCE II with a BBO probe at 298 K using CDCl<sub>3</sub>, CD<sub>2</sub>Cl<sub>2</sub>, MeOH-*d*<sub>4</sub> or DMSO-*d*<sub>6</sub> as solvents. Chemical shifts are given in ppm relative to the residual solvent peak (<sup>1</sup>H NMR: CDCl<sub>3</sub> δ 7.26; MeOH-*d*<sub>4</sub> 3.31; DMSO-*d*<sub>6</sub> 2.50; <sup>13</sup>C NMR: CDCl<sub>3</sub> δ 77.16; MeOH-*d*<sub>4</sub> 49.00; DMSO-*d*<sub>6</sub> 39.52) with multiplicity (s = singlet, d = doublet, t = triplet, q = quartet, m = multiplet, app = apparent), coupling constants (in Hz) and integration. High-resolution mass analyses were obtained using a Bruker microTOF ESI or APCI.



## 2. Synthesis of Starting Materials

The diaryliodonium salts used in this investigation were synthesized according to published procedures.

### 2.1. Synthesis of Diaryliodonium Salts 1

#### 4-Nitrophenyl(phenyl)iodonium Triflate (1a)

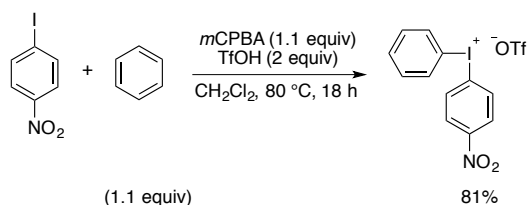

Synthesized according to our published procedure.<sup>[3]</sup> Spectral data are in agreement with published data. **Note:** For synthesis of this salt  $\text{CH}_2\text{Cl}_2$  stabilized with  $\text{EtOH}$  should not be used. The reaction can also be performed at  $rt$ .

#### Di(*p*-tolyl)iodonium Triflate (1b)

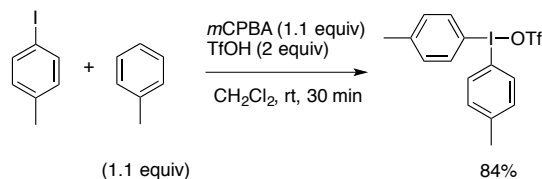

Synthesized according to our published procedure.<sup>[3]</sup> Spectral data are in agreement with published data.

#### Di(4-methoxyphenyl)iodonium Triflate (1c)

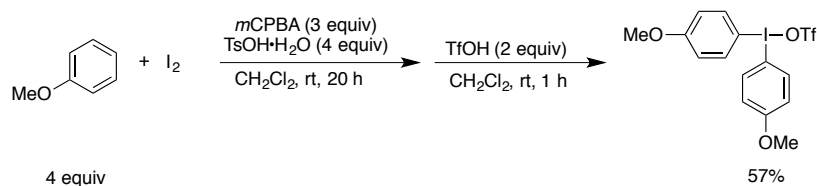

Synthesized according to our published procedure.<sup>[4]</sup> Remaining tosic acid was removed via filtration over basic alumina after the anion exchange.<sup>[5]</sup>

$^1\text{H NMR}$  (400 MHz,  $\text{CDCl}_3$ )  $\delta$  8.12 (d,  $J = 9.0$  Hz, 4H), 7.06 (d,  $J = 9.0$  Hz, 4H), 3.79 (s, 6H)

$^{13}\text{C NMR}$  (100 MHz,  $\text{CDCl}_3$ )  $\delta$  161.8, 136.9, 120.7 (q,  $J = 323$  Hz) 117.3, 106.0, 55.7

## Diphenyliodonium Triflate (1d)

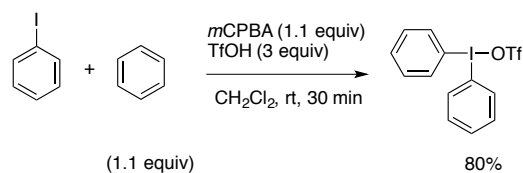

Synthesized according to our published procedure.<sup>[6]</sup> Spectral data are in agreement with published data.

## Diphenyliodonium Triflate-*d*<sub>10</sub> (1d-D)

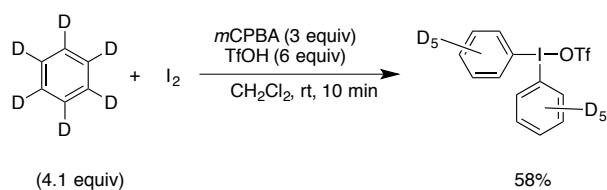

Synthesized according to our published procedure.<sup>[6]</sup> Spectral data are in agreement with published data.<sup>[7]</sup>

## Dimesityliodonium Triflate (1e)

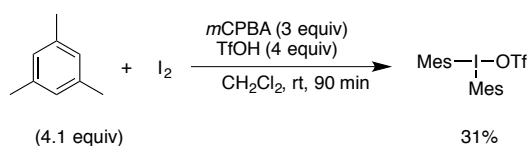

Synthesized according to our published procedure.<sup>[6]</sup> Spectral data are in agreement with published data.

## Mesityl(phenyl)iodonium Bromide (1f)

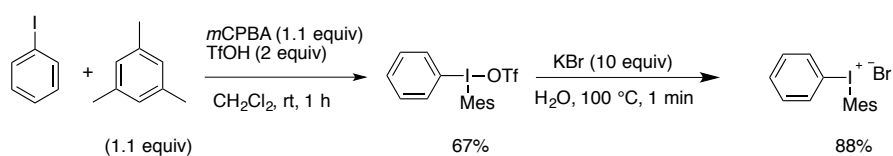

Triflate salt synthesized according to a published procedure.<sup>[3]</sup> Anion exchange according to a published procedure.<sup>[8]</sup> Spectral data are in agreement with published data.<sup>[9]</sup>

### Di(*m*-tolyl)iodonium Tetrafluoroborate (**1g**)

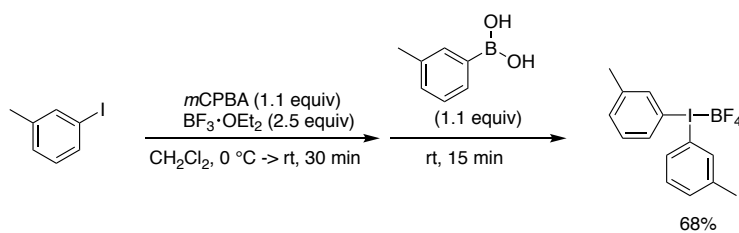

Synthesized according to our published procedure.<sup>[10]</sup> All spectral data are in agreement with published data.<sup>[11]</sup>

### Di(*o*-tolyl)iodonium Tetrafluoroborate (**1h**)

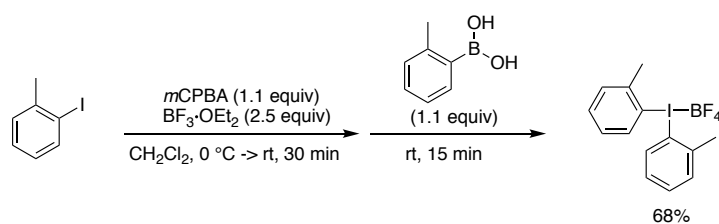

Synthesized according to a published procedure.<sup>[10]</sup> All spectral data are in agreement with published data.

### Mesityl(4-nitrophenyl)iodonium Tosylate (**1i**)

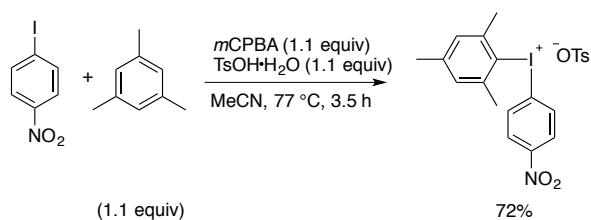

Synthesized according to a published procedure.<sup>[12]</sup> The  $^{13}\text{C}$  NMR is in full agreement with published data. In the  $^1\text{H}$  NMR the doublet that was reported at 6.39 ppm was found at 7.20 ppm.<sup>[13]</sup>

## Mesityl(*p*-tolyl)iodonium Bromide (**1j**)

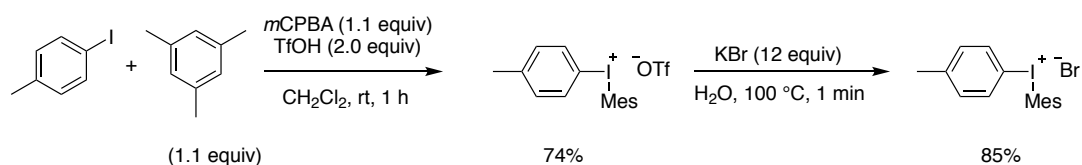

Triflate salt synthesized according to our published procedure.<sup>[3]</sup> Anion exchange according to a published procedure.<sup>[8]</sup>

mp = 156-158 °C

<sup>1</sup>H NMR (400 MHz, CDCl<sub>3</sub>) δ 7.68-7.63 (m, 2H), 7.08 (d, *J* = 8.0 Hz, 2H), 7.00 (s, 2H), 2.66 (s, 6H), 2.29 (s, 6H)

<sup>13</sup>C NMR (100 MHz, CDCl<sub>3</sub>) δ 142.7, 141.5, 141.0, 132.8, 132.2, 129.9, 126.8, 115.6, 27.2, 21.3, 21.2

HRMS (ESI): calcd for C<sub>16</sub>H<sub>18</sub>I [M-Br]<sup>+</sup>: 337.0453; found: 337.0439.

## 2.2. Synthesis of Alcohols **3**

### 1-(4-Biphenyl)ethanol-*d*<sub>1</sub> (**3b-D**)

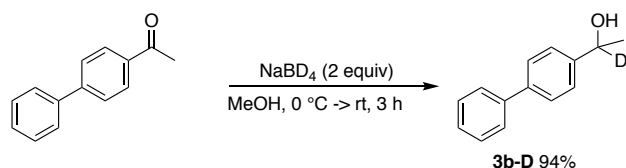

Synthesized according to a slightly modified literature procedure.<sup>[14]</sup> An oven-dried two-necked round-bottomed flask was evacuated and backfilled with argon three times, then charged with 4-phenylacetophenone (785 mg, 4 mmol) and MeOH (50 mL). The mixture was cooled to 0 °C and NaBD<sub>4</sub> (335 mg, 8 mmol, 2 equiv) was added in portions during 1 h after which the mixture was stirred at rt for 3 h. The reaction was quenched with HCl (1 M), and then extracted with EtOAc (x3), the combined organic phases were dried over Na<sub>2</sub>SO<sub>4</sub>, filtered and concentrated down. The crude residue was purified using flash chromatography (SiO<sub>2</sub>, pentane -> pentane/EtOAc 75:25 as eluent), which gave the desired alcohol **3b-D** as a white powder (753 mg, 94%).

mp = 96-97 °C (ref 95-96 °C)<sup>[15]</sup>

<sup>1</sup>H NMR (400 MHz, CDCl<sub>3</sub>) δ 7.62-7.57 (m, 4H), 7.49-7.42 (m, 4H), 7.39-7.33 (m, 1H), 1.87 (bs, 1H), 1.54 (s, 3H).

<sup>13</sup>C NMR (100 MHz, CDCl<sub>3</sub>) δ 144.9, 141.0, 140.6, 128.9, 127.4, 127.2, 126.0, 70.3 (H Alcohol), 69.9 (t), 25.2.

*Traces of the non-deuterated product could be detected in the NMR spectra.*

HRMS (ESI): calcd for C<sub>14</sub>H<sub>13</sub>DNaO [M+Na]<sup>+</sup>: 222.1000; found: 222.1002 .

### 1-(4-Biphenyl)ethanol (**3b**)

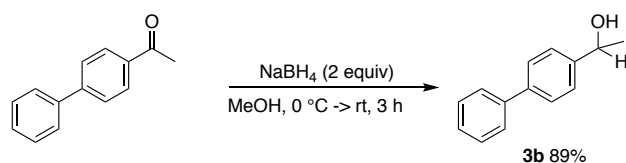

Synthesized according to the same procedure as for **3b-D**. The reaction was performed on 10 mmol scale. The desired alcohol **3b** was isolated as a white powder in 89% (1.77 g).

MP: 96-97 °C (ref 95-96 °C)<sup>[16]</sup>

<sup>1</sup>H NMR (400 MHz, CDCl<sub>3</sub>) δ 7.66-7.55 (m, 4H), 7.52-7.41 (m, 4H), 7.41-7.32 (m, 1H), 4.96 (q, *J* = 6.5 Hz, 1H), 1.94 (bs, 1H), 1.55 (d, *J* = 6.5 Hz, 3H).

<sup>13</sup>C NMR (100 MHz, CDCl<sub>3</sub>) δ 144.9, 140.9, 140.6, 128.9, 127.4, 127.2, 126.0, 70.3, 25.3.

<sup>13</sup>C NMR not the same as in reference with HRMS<sup>[17]</sup> but matches reference including melting point.

HRMS (ESI): calcd for C<sub>14</sub>H<sub>14</sub>NaO [M+Na]<sup>+</sup>: 221.0937; found: 221.0942 .

### 3. Arylation of Hydroxide

#### 3.1. Synthesis of Reference Diaryl Ethers

In order to confirm the components in the reaction mixtures during the mechanistic investigations, several diaryl ethers were synthesized. This was done according to a published procedure by the Olofsson group.<sup>[18]</sup>

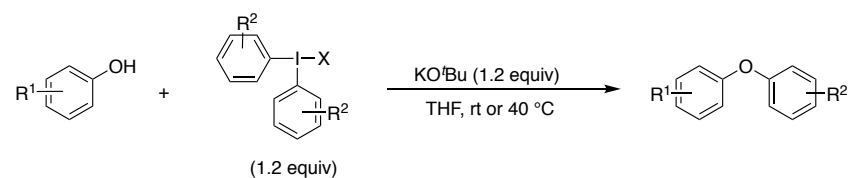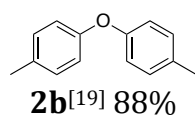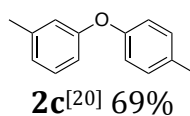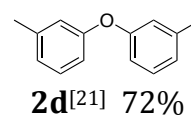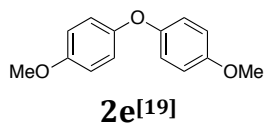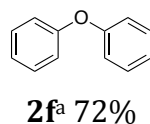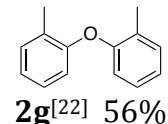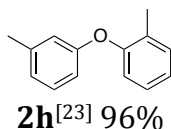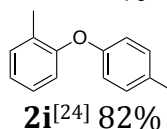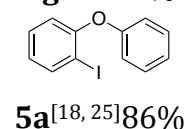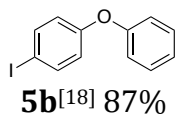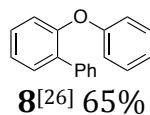

<sup>a</sup> Synthesized according to a different procedure.<sup>[27]</sup>

### 3.2. Initial Solvent Screening

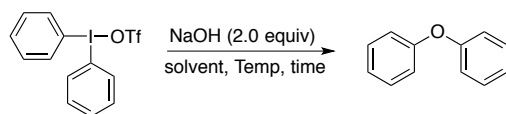

| Entry | Time | Temp (°C) | Solvent                         | Yield (%) <sup>a</sup> | Comment |
|-------|------|-----------|---------------------------------|------------------------|---------|
| 1     | on   | 60        | H <sub>2</sub> O                | 51                     |         |
| 2     | on   | 80        | H <sub>2</sub> O                | 66                     |         |
| 3     | on   | 100       | H <sub>2</sub> O                | 64                     |         |
| 4     | on   | 40        | THF                             | trace                  |         |
| 5     | on   | 60        | THF                             | 21                     |         |
| 6     | on   | 40        | 1,4-Dioxane                     | 8                      |         |
| 7     | on   | 40        | Toluene                         | 26                     | Impure  |
| 8     | on   | 40        | CH <sub>2</sub> Cl <sub>2</sub> | 38                     | Impure  |
| 9     | 4    | 40        | CH <sub>2</sub> Cl <sub>2</sub> | 30                     | Impure  |
| 10    | on   | rt        | CH <sub>2</sub> Cl <sub>2</sub> | 38                     | Impure  |

<sup>a</sup> <sup>1</sup>H NMR yield using internal standard.

The reaction was initially performed in water (entries 1-3). When organic solvents were tested, ether solvents such as THF and 1,4-dioxane gave poor results (entries 4-6). When the apolar solvents toluene and CH<sub>2</sub>Cl<sub>2</sub> were used the reaction gave conversion into product at lower temperature, which was deemed interesting. Unfortunately efforts to isolate the diphenyl ether were unsuccessful, yielding mixture of ethers as results. This was seen for both the aqueous reaction and in organic solvents.

### 3.3. General Procedure for the Arylation of Hydroxides

#### 3.3.1. General Procedure A

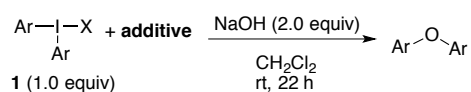

Sodium hydroxide (1.6 mmol, 2 equiv) was added to a 10-20 mL or 2-5 mL microwave vial and CH<sub>2</sub>Cl<sub>2</sub> (3 mL) was added. The indicated additive was added followed by immediate addition of diaryliodonium salt **1** (0.8 mmol, 1 equiv). The reagents were rinsed down from the walls of the vial using CH<sub>2</sub>Cl<sub>2</sub> (1 mL). The vial was capped and stirred at rt for 22 h. The reaction mixture was quenched with sat. NH<sub>4</sub>Cl and then extracted with CH<sub>2</sub>Cl<sub>2</sub> (x3). The combined organic phases were dried over MgSO<sub>4</sub>, filtrated and the solvent removed *in vacuo*. The crude mixture was then submitted to column chromatography.

*Note: The yields of the ethers were calculated based on that 1 equiv Ar<sub>2</sub>IX gives maximum 0.5 equiv diaryl ether.*

#### 3.3.2. General Procedure B

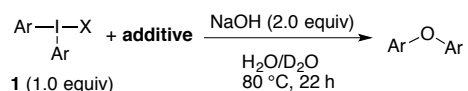

Sodium hydroxide (1.6 mmol, 2 equiv) was added to a 10-20 mL or 2-5 mL microwave vial and deionized H<sub>2</sub>O (3 mL) was added. The indicated additive was added followed by immediate addition of diaryliodonium salt **1** (0.8 mmol, 1 equiv). The reagents were rinsed down from the walls of the vial using H<sub>2</sub>O (1 mL). The vial was capped and stirred in a pre-heated oil bath at 80 °C for 22 h. The vial was removed from the heat and cooled to rt. It was then extracted with CH<sub>2</sub>Cl<sub>2</sub> (x3) and the combined organic phases were dried over MgSO<sub>4</sub>, filtered and the solvent was removed *in vacuo*. The crude mixture was then submitted to column chromatography or to <sup>1</sup>H NMR yield determination using 1,3,5-trimethoxybenzene (0.4 mmol) as internal standard.

*Note: The yields of the ethers were calculated based on that 1 equiv Ar<sub>2</sub>IX gives maximum 0.5 equiv diaryl ether.*



### 3.4. Arylations with Salt **1b**

#### 3.4.1. Identification of By-Products

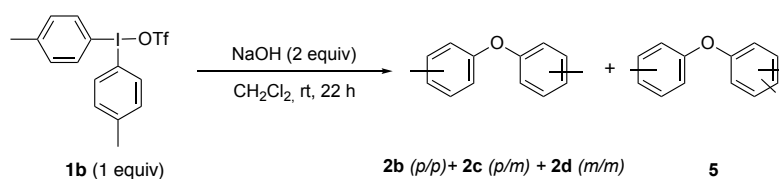

The reaction was performed according to general procedure A using **1b**. After flash column chromatography (silica gel, pentane → 2% CH<sub>2</sub>Cl<sub>2</sub> in pentane) a mixed ether fraction was isolated as a colorless oil (57.1 mg).

The <sup>1</sup>H NMR of the ether fraction was overlapped with the separately synthesized ethers **2b-d** and **2g-i**, which showed that **2b** and **2c** had formed. The formation of **2d** was hard to confirm from <sup>1</sup>H NMR. It was difficult to assign the regioisomers with <sup>1</sup>H NMR, and the <sup>13</sup>C NMR spectrum proved more revealing.

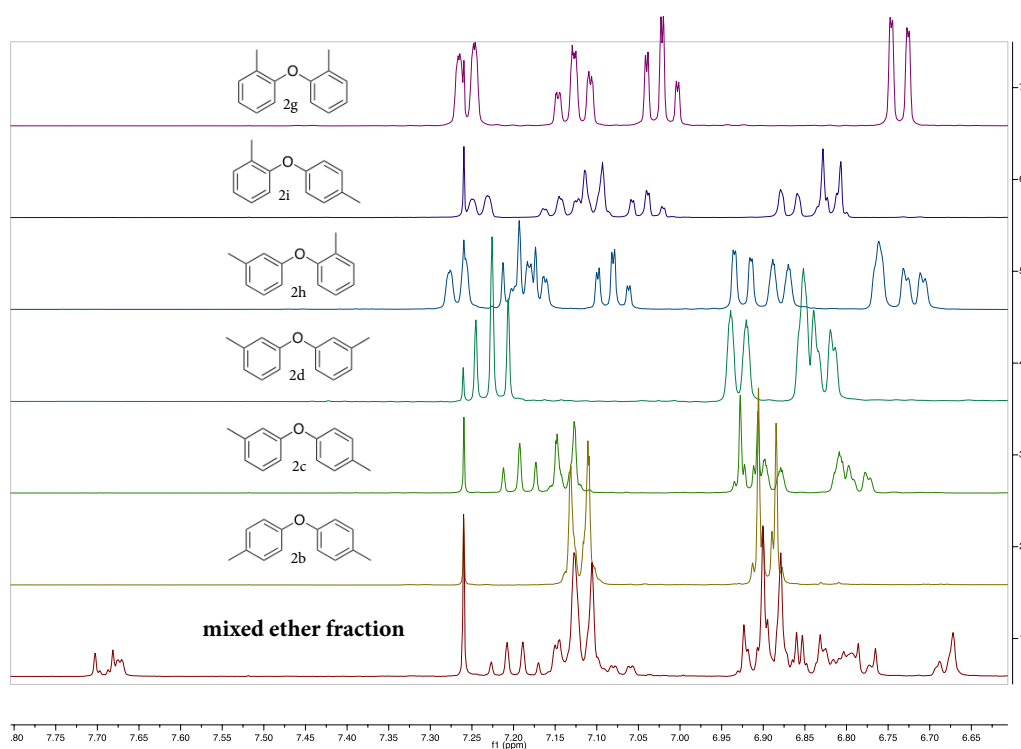

The <sup>13</sup>C NMR of the ether fraction was very complex. When the mixed ether fraction was overlapped with the synthesized regioisomers **2b-d** and **2g-i** many of the peaks were matching. It was difficult to assign the peaks to the different regioisomers in the mixture, but the extra peaks at 88.9 and 84.6 ppm support the presence of iodo-substituted products **5**.

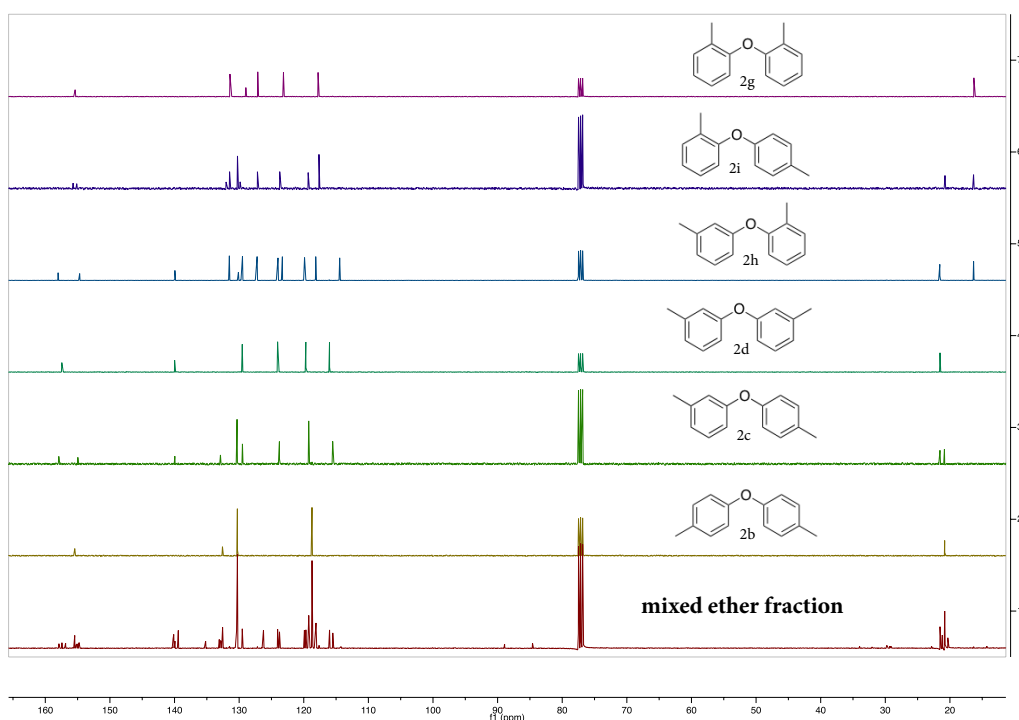

When the  $^{13}\text{C}$  NMR spectra of the regioisomers **2b**, **2c** and **2d** were overlapped with the ether fraction the presence of these regioisomers could be confirmed.

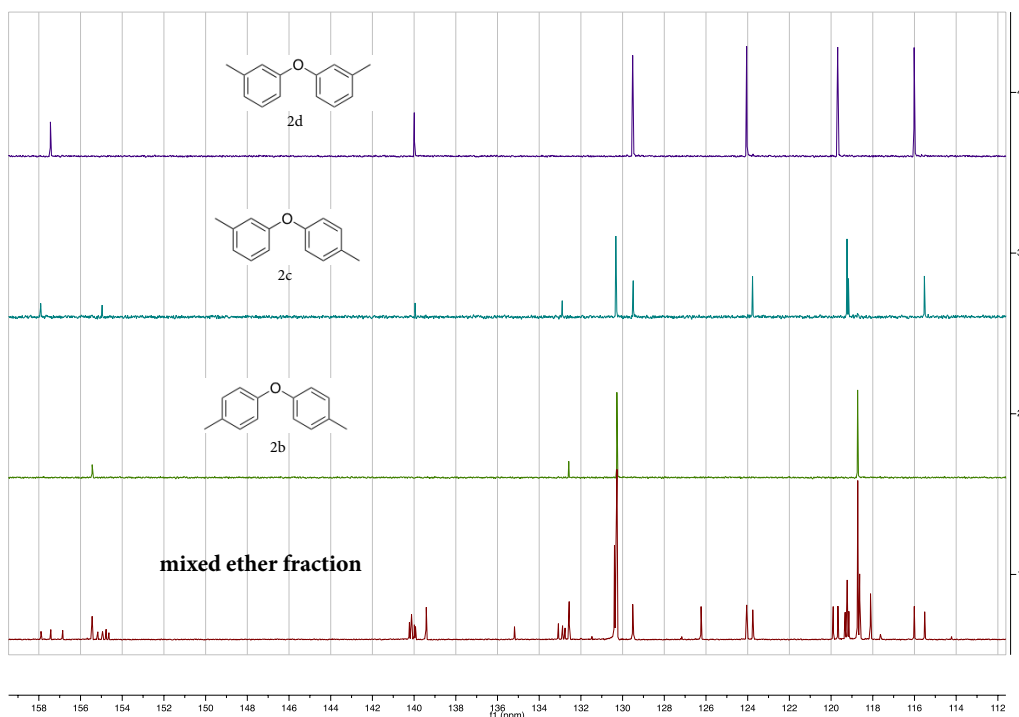

When the  $^{13}\text{C}$  NMR spectra of the regioisomers **2g**, **2i** and **2h** were overlapped with the ether fraction, only traces of what appears to be **2i** matched. The other regioisomers could not be found in detectable amounts.

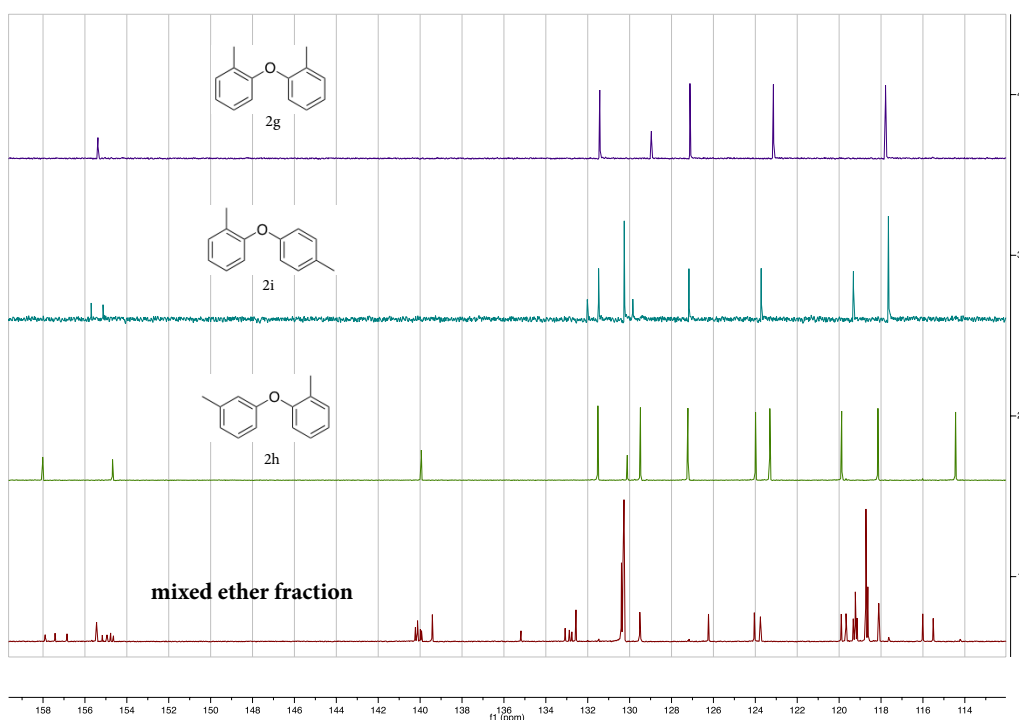

When the ether fraction was analyzed using GC-MS, four peaks with the same mass as **2b** and its regioisomers were found. Also, two peaks with the same mass as iodo-substituted products **5** were found.

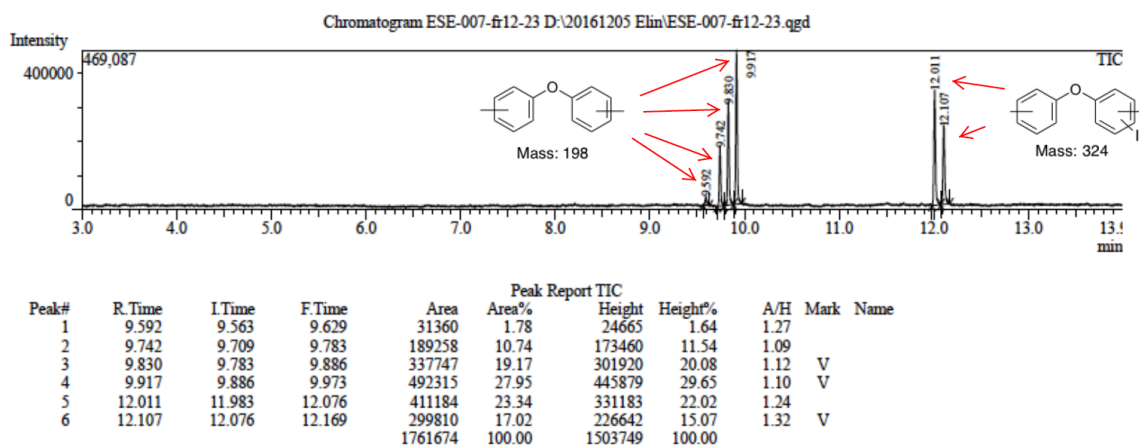

Conclusion from the experiment:

Arylation of hydroxide with **1b** gave a complex mixture of diaryl ethers **2b**, **2c** and **2d**. There probably was a rather large amount of iodo-substituted products **5**.

### 3.4.2. Trapping of Aryne with Furan

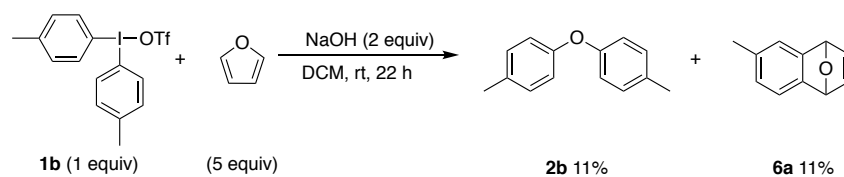

The reaction was performed according to general procedure A using **1b** with furan as additive.

The iodo-arene, the Diels Alder adduct **6a**, and the diaryl ether **2b** were detected in the crude mixture. Only one regioisomer of the diaryl ether was isolated after purification.

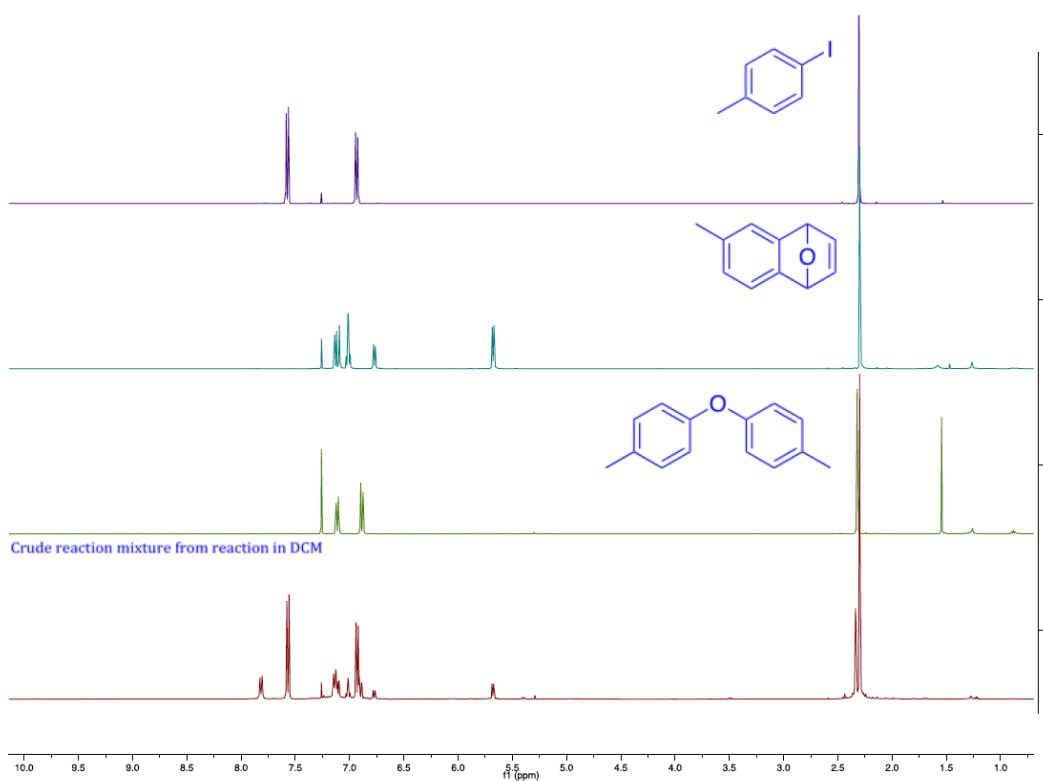

### 6-Methyl-1,4-epoxy-1,4-dihydronaphthalene (**6a**)<sup>[12, 28]</sup>

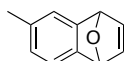

All spectral data are in agreement with published data.

### 3.4.3. Trapping of Aryne with Piperidine

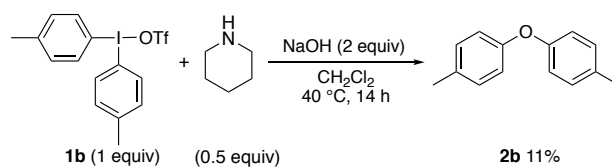

The reaction was performed according to a small modification of general procedure A using **1b** with piperidine as additive, which suppressed the formation of by-products.

### 3.4.4. Comparison with and without Aryne Traps

Comparing the crude  $^1\text{H}$  NMR of the reactions with and without additives showed a cleaner reaction with the additives.

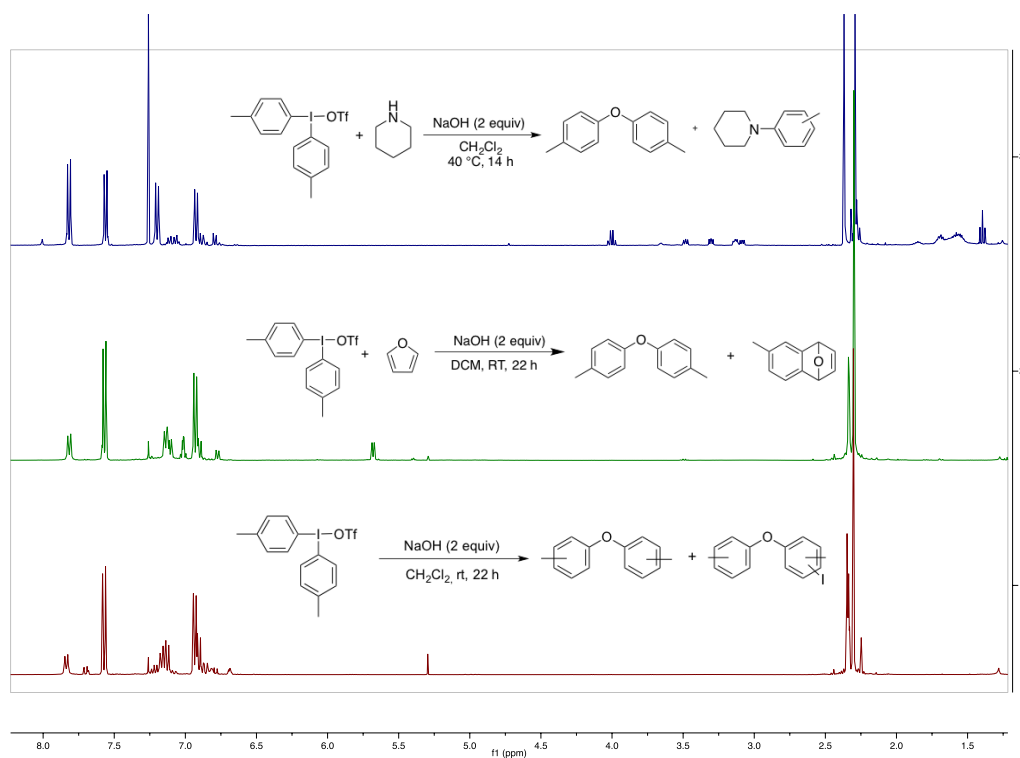

Furthermore, the use of additives allowed for isolation of only the desired diaryl ether **2b**.

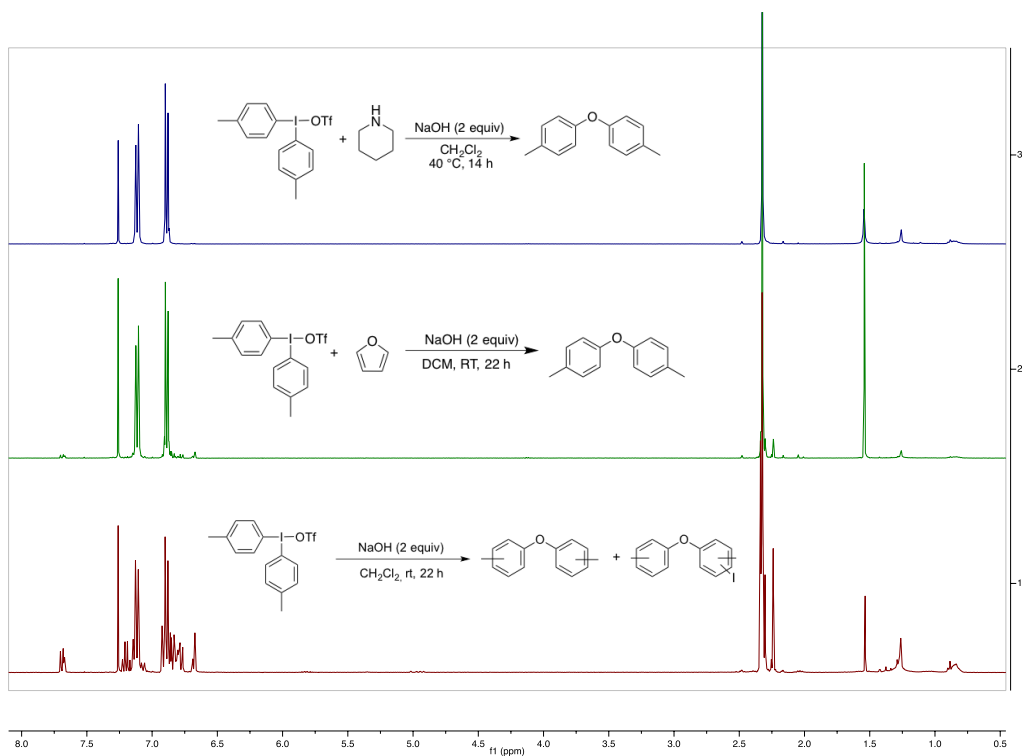

### 3.5. Arylation with Salt **1c**

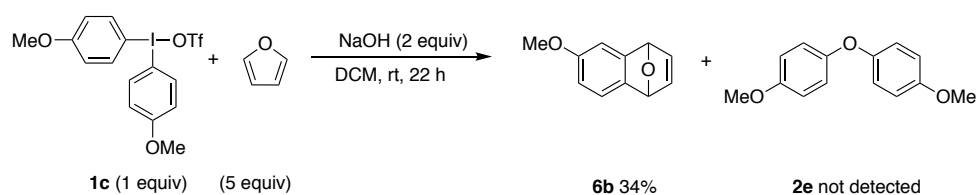

The reaction was performed according to general procedure A using **1c** with furan as additive. Diaryl ether **2e** could neither be detected nor isolated from the reaction above. The Diels Alder adduct **6b** was isolated in 34% yield and the corresponding aryl iodide was isolated in 59% yield.

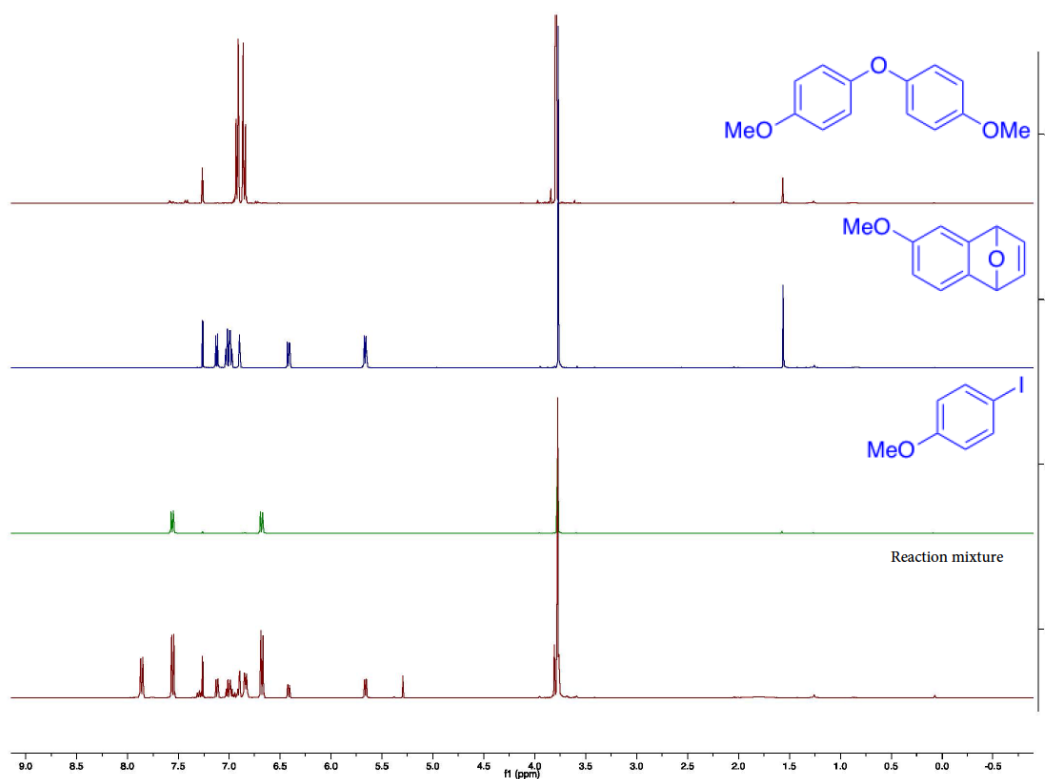

#### 6-Methoxy-1,4-dihydro-1,4-epoxynaphthalene (**6b**)

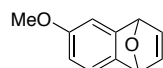

Isolated as a white powder in 34% yield (47 mg). All spectral data are in agreement with published data.<sup>[12]</sup>

### 3.6. Arylation with Salt 1a

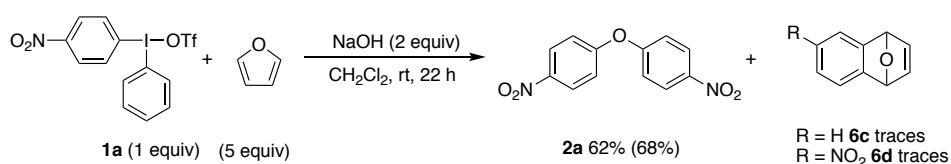

The reaction was performed according to general procedure A using **1a** with furan as additive. After work-up, the NMR-yield was determined to 67% after addition of 1,3,5-trimethoxybenzene as internal standard. Only trace of the Diels-Alder adducts **6c** and **6d** were detected. Then, the crude was purified by flash column chromatography (silica gel, pentane  $\rightarrow$  15% EtOAc in pentane) to obtain diaryl ether **2a** as a yellow solid in 62%. Some of ether **2a** was obtained in mixed fractions and the total yield was calculated to 68%.

*Note: good stirring was extremely important in this reaction, otherwise the yield of ether **2a** dropped drastically.*

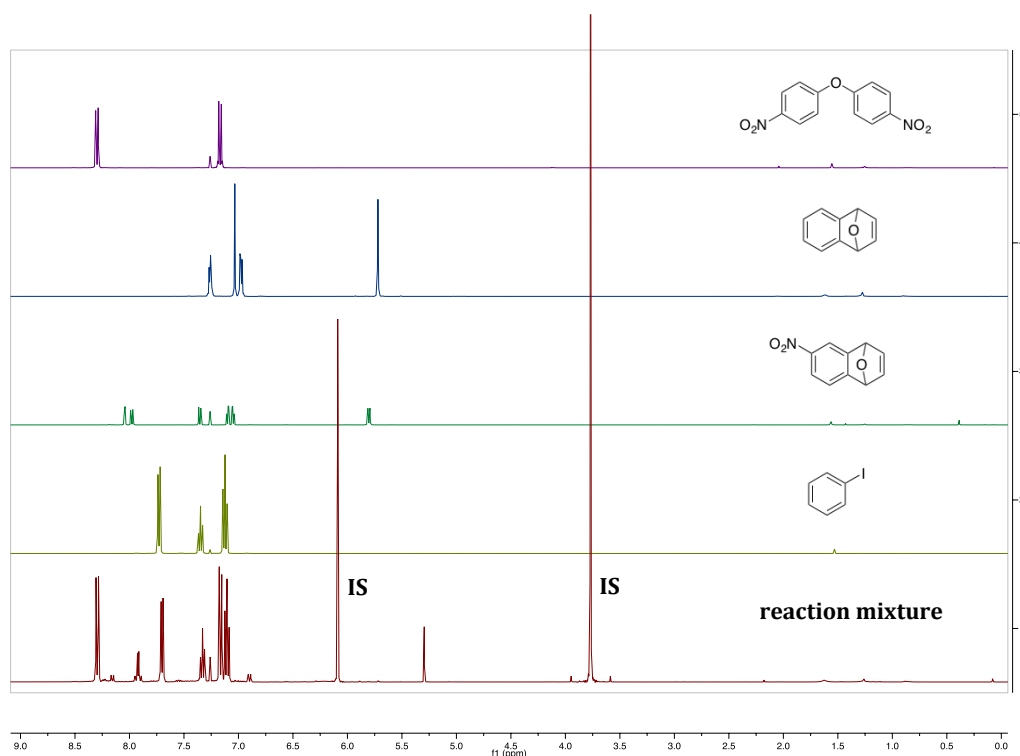

Traces of the Diels-Alder adducts were only seen upon enlargement.

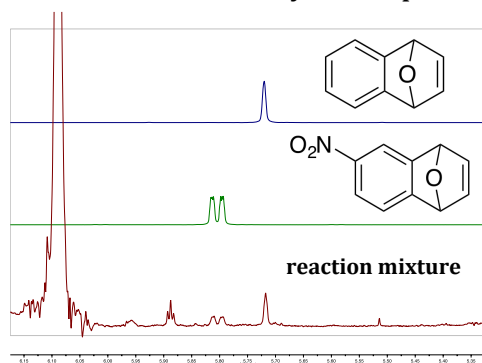



## 4,4'-Dinitrodiphenyl Ether (2a)

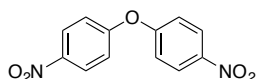

Isolated as yellow solid in 62% (64.3 mg). Spectral data are in agreement with published data.<sup>[29]</sup>

## 1,4-Dihydro-7-nitro-1,4-epoxynaphthalene (6d)

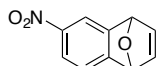

Synthesized according to a modified published procedure to obtain reference material.<sup>[12]</sup> NaHMDS (0.6 M in toluene) was used as a base instead of LiHMDS (1 M in toluene). The product was obtained as a yellow oil that solidified to an orange solid in 56% yield. The <sup>1</sup>H NMR is in full agreement to published data.<sup>[30]</sup> In <sup>13</sup>C NMR one of the two peaks at 143 ppm was not found, but a peak at 82.2 ppm was found instead.

## 3.7. Arylation with Salt 1d

### 3.7.1. Identification of By-Products

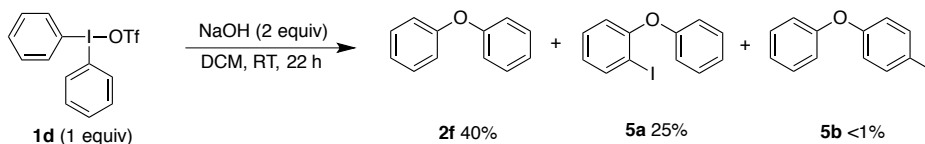

Synthesized according to the general procedure A using **1d**. After purification by flash column chromatography (silica gel, pentane  $\rightarrow$  2% CH<sub>2</sub>Cl<sub>2</sub> in pentane) two mixed fractions of ethers were obtained. The first fraction contained **2f** and **5a** together with traces of **5b**. The second fraction was a mixture of only **2f** and **5a**. From these mixtures, the yields were calculated to 40% of **2f**, 25% of **5a** and approximate 1% of **5b**.

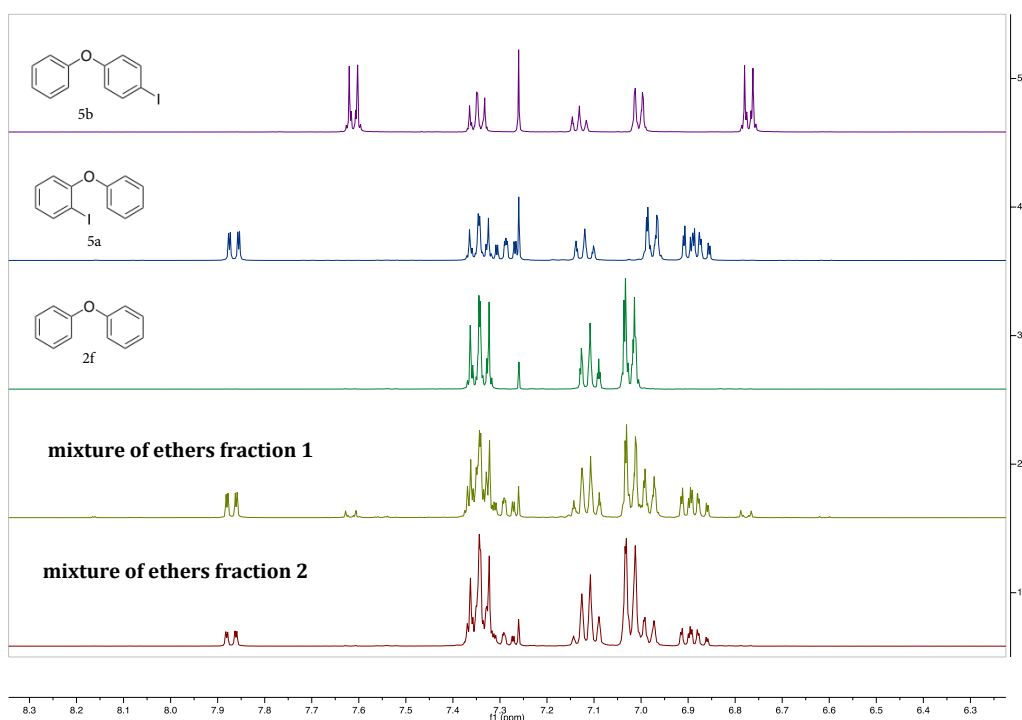

In the  $^{13}\text{C}$  NMR the same ethers were seen. **5b** was in such small amounts it was barely detected.

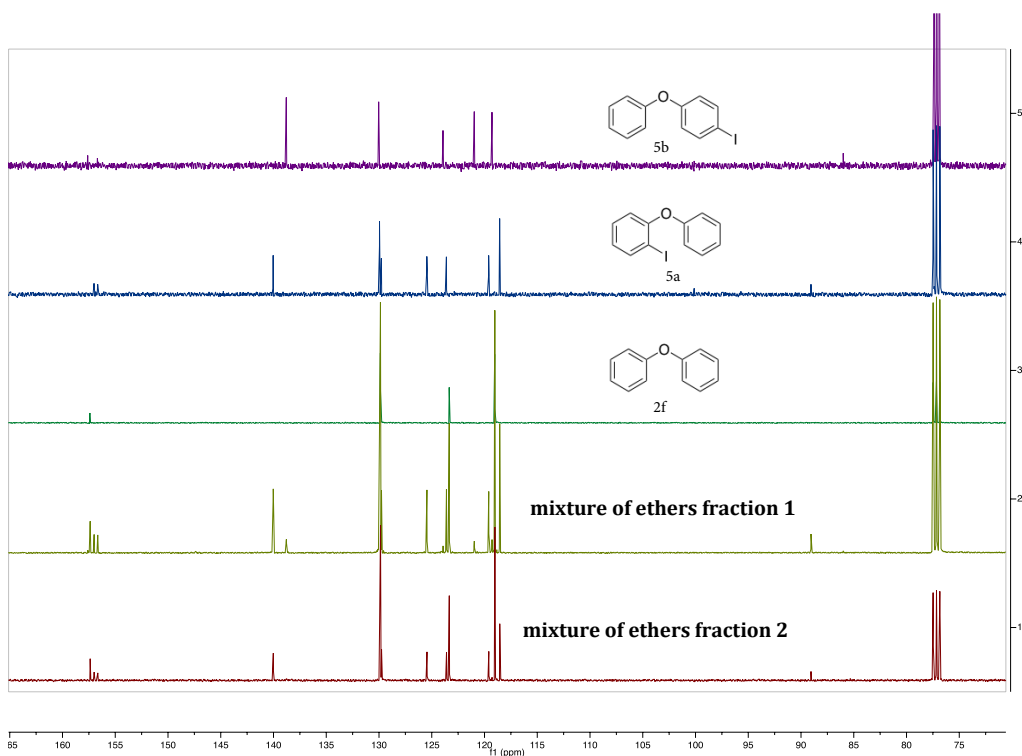

When the two ether fractions were submitted to GC-MS, peaks with the corresponding masses for **2f** and **5a** were found. The amount of **5b** in fraction 1 was below the detection limit.

### GC-MS Ether fraction 1

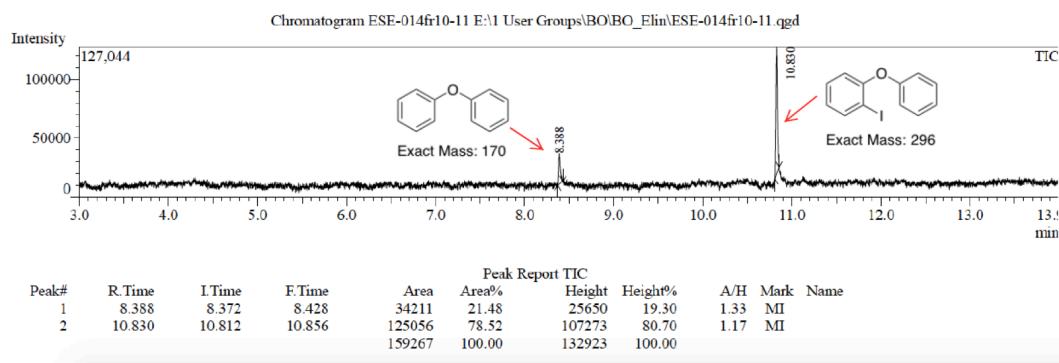

### GC-MS Ether fraction 2

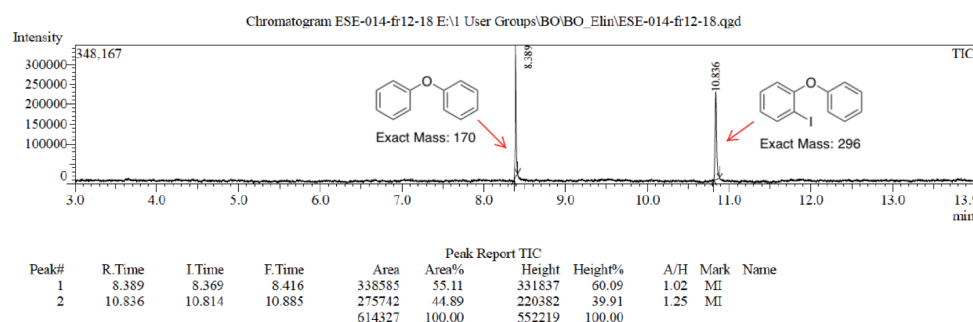

### 3.7.2. Trapping of Benzyne with Furan

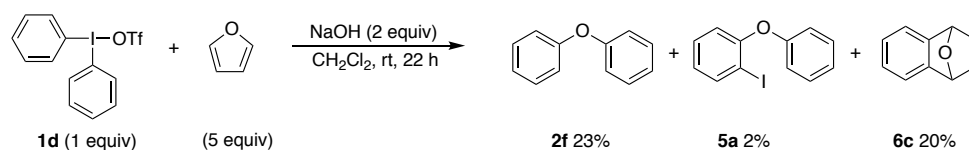

The reaction was performed according to general procedure A using **1d** with furan as additive. The desired **2f** was formed in 23%, together with iodo-substituted product **5a** in 2% (calculated yields from ether fraction after flash chromatography). The Diels-Alder adduct **6c** was isolated in 20%. **5a** was detectable in the crude  $^1\text{H}$  NMR spectrum, but was easier to confirm after purification.

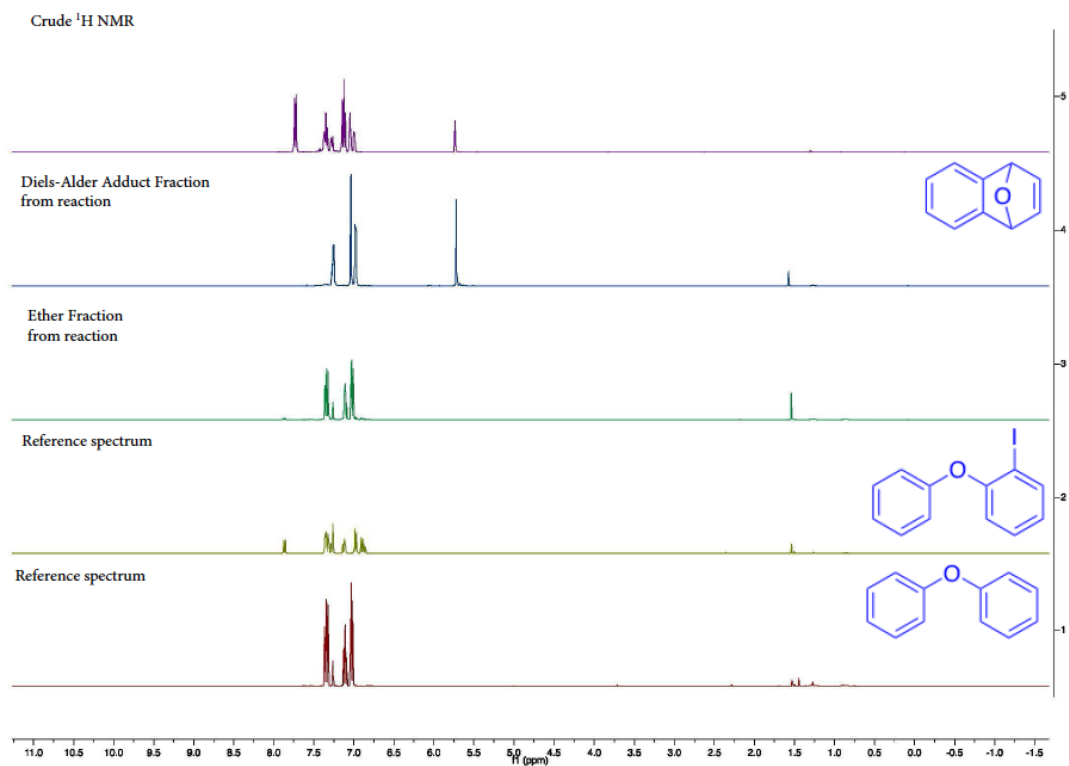

### 1,4-Dihydro-1,4-epoxynaphthalene (6c)

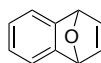

All spectral data are in agreement with the commercial compound, CAS: [573-57-9].

### 3.7.4. Trapping of Benzyne with Piperidine

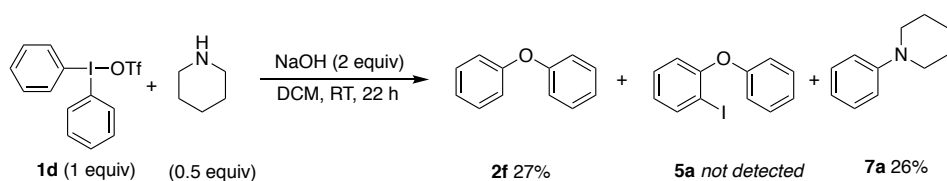

The reaction was performed according to general procedure A using **1d** with piperidine as additive. Piperidine proved to be a more efficient trap than furan as iodo-substituted **5a** was not detected in the mixture. **2f** was isolated as a pure compound.

In the crude spectrum **7a** was detected and could be isolated. The iodo-substituted product **5a** was neither detected in the crude  $^1\text{H}$  NMR nor in the isolated ether fraction, as shown below.

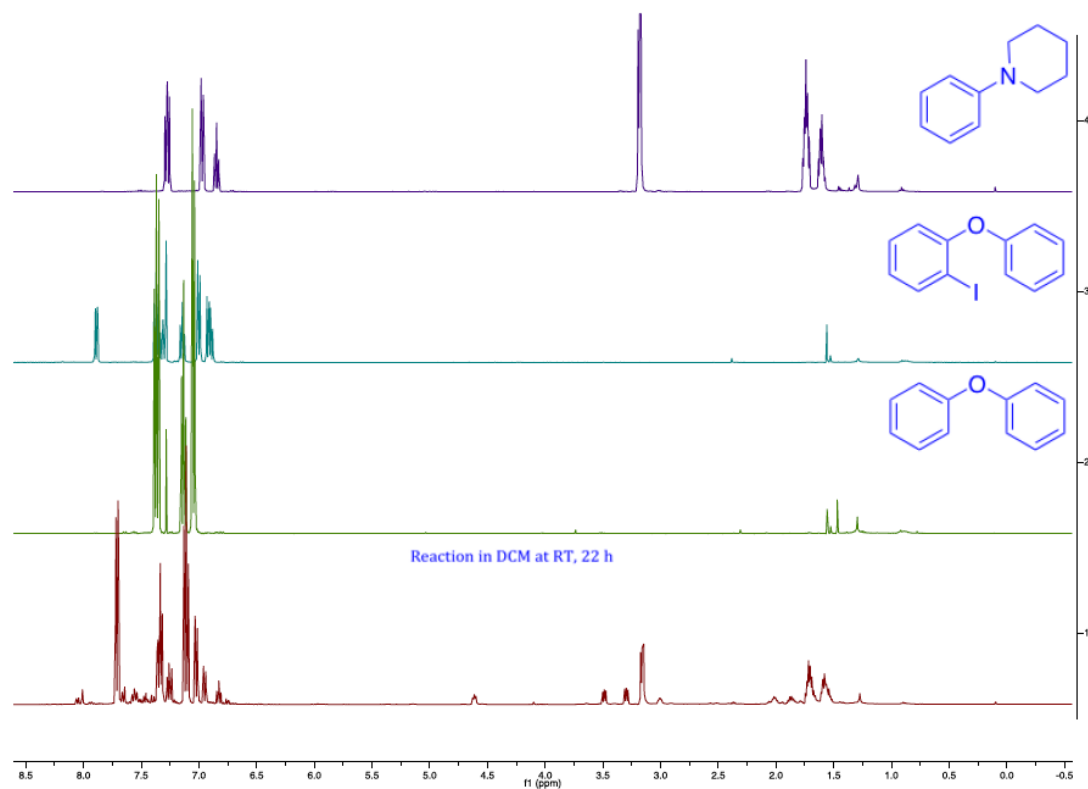

Ether fraction from the reaction indicates clean diphenyl ether **2f**.

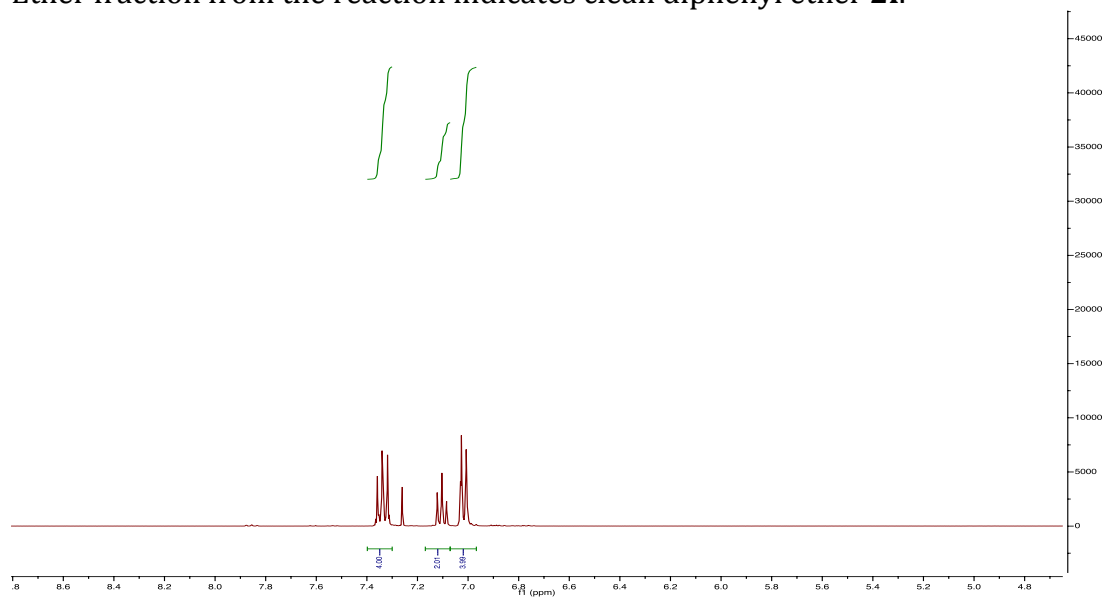

### 1-Phenylpiperidine (**7a**)

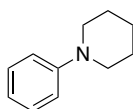

All spectral data are in agreement with published data.<sup>[31]</sup>

### 3.7.5. Comparison with and without Aryne Traps

When the crude spectra of reactions with and without additives were compared, it was concluded that iodo-substituted **5a** was not formed with piperidine and in low amounts with furan. Reaction without any additives showed a messier spectrum.

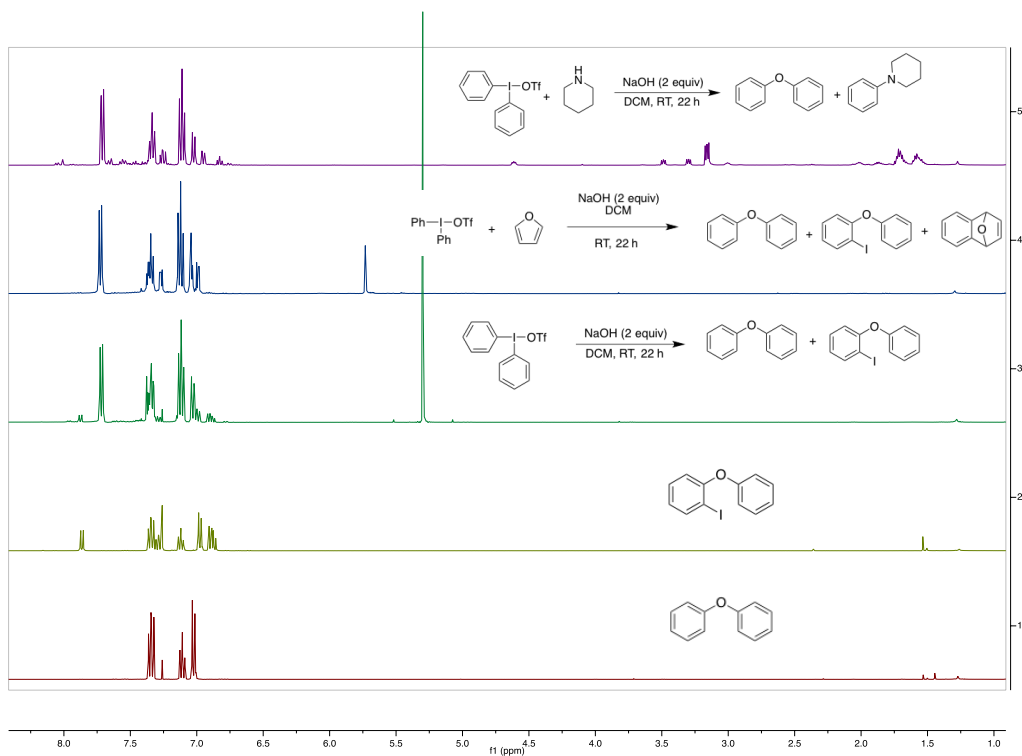

The same trend was more easily seen in the isolated ether fractions from reactions with and without traps. Two ether fractions were isolated in the reaction without traps.

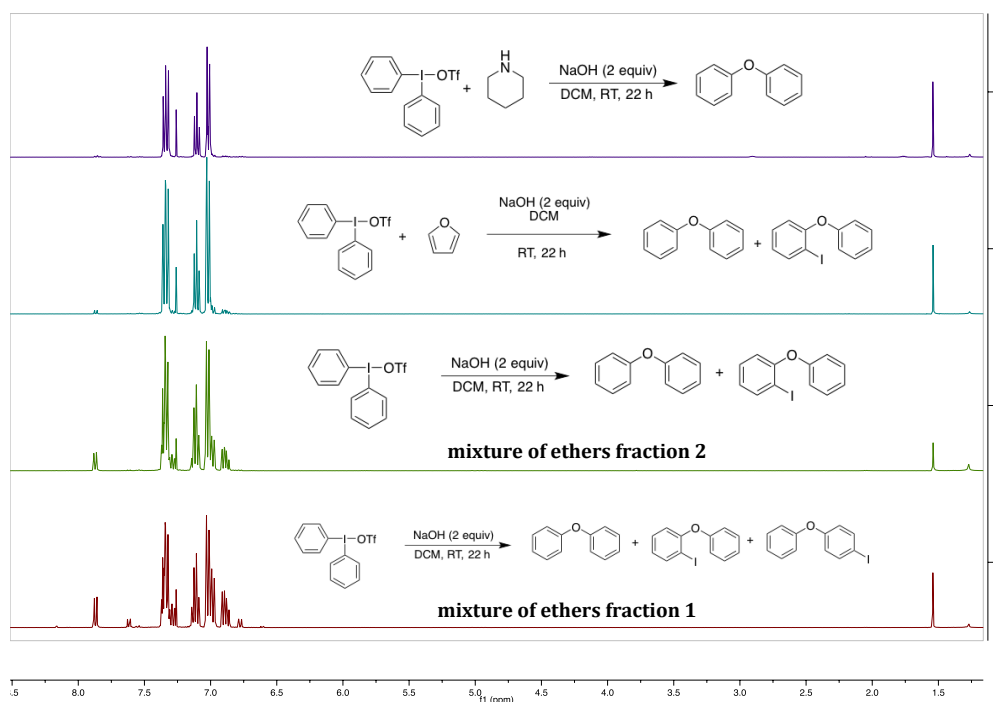

### 3.7.6. Addition of Another Aryl Iodide

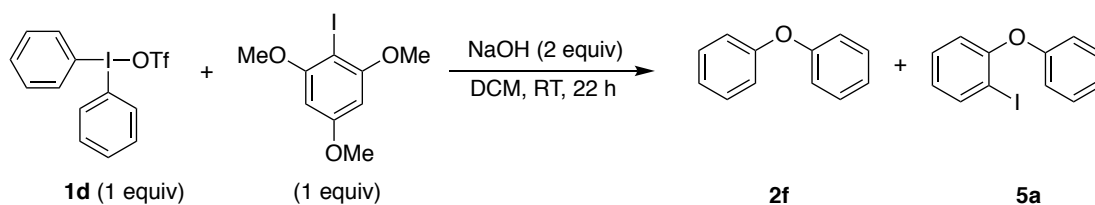

The reaction was performed according to general procedure A using **1d** with 2,4,6-trimethoxyiodobenzene as additive. The ratio between products **2f** and **5a** were determined from the crude <sup>1</sup>H NMR and compared to the ratio obtained in the reaction without any additives. It was concluded that the additive did not alter the ratio between these two products.



### 3.7.7. Salt **1d** in H<sub>2</sub>O

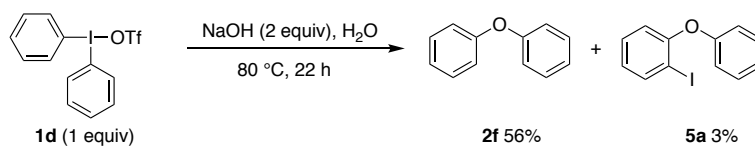

The reaction was performed according to general procedure B using **1d**. The yields were calculated from the ratio obtained in the <sup>1</sup>H NMR of the ether fraction. As depicted below, the iodo-substituted product **5a** was formed in minor amounts.

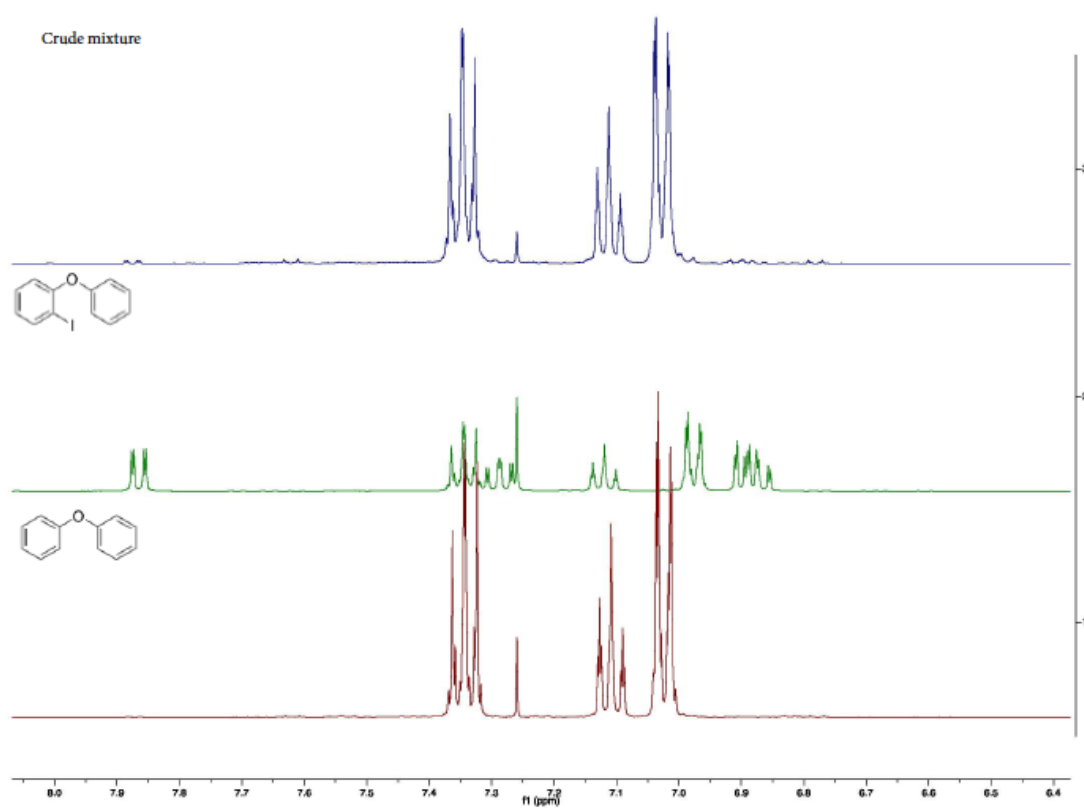

Isolated ether fraction of **2f**, the iodo-substituted product **5a** was barely detected.

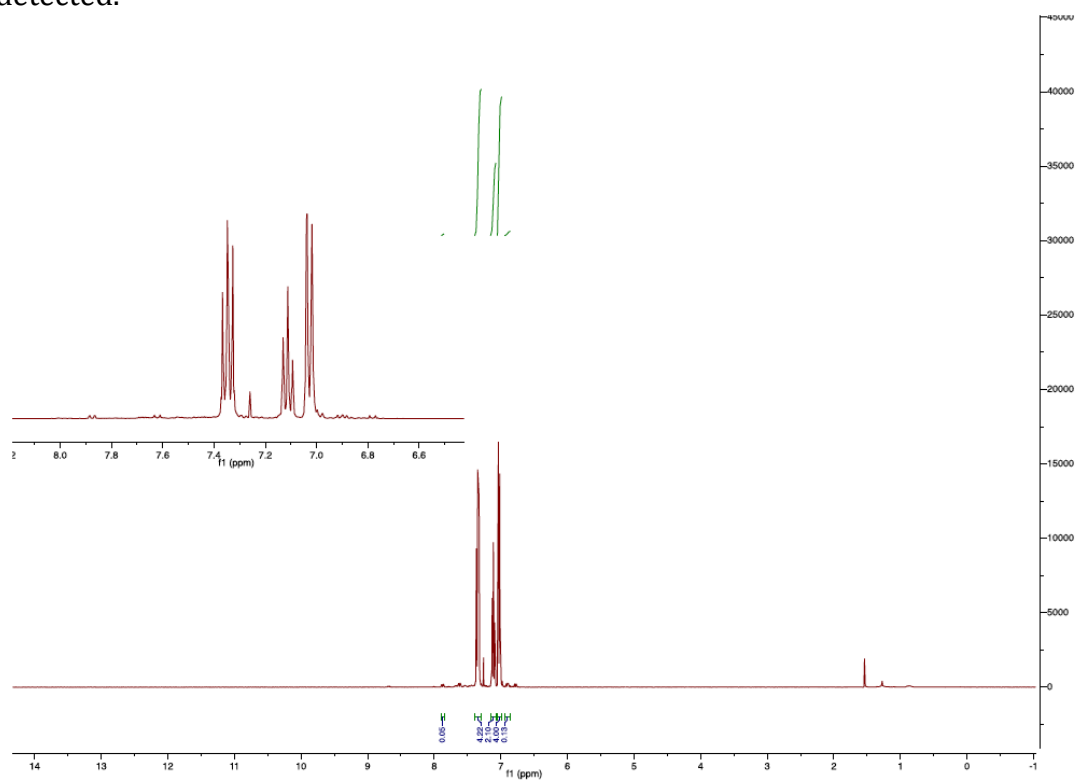

## 3.9. Deuterium-Labeling Experiments

### 3.9.1. Salt **1d** in D<sub>2</sub>O without Trap

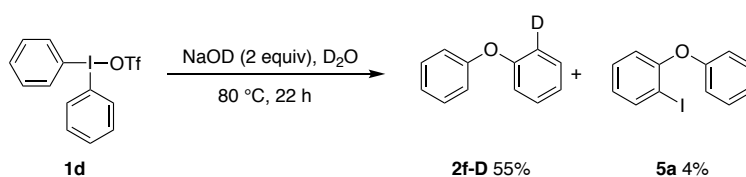

The reaction was performed according to general procedure B using **1d**. The crude was purified using flash chromatography and the ether fraction was analyzed to investigate how much deuterium that was incorporated into the product. The yields were calculated from the ratio obtained in the <sup>1</sup>H NMR of the ether fraction.

The presence of the product **5a** and the diphenyl ether **2f-D** is shown below.

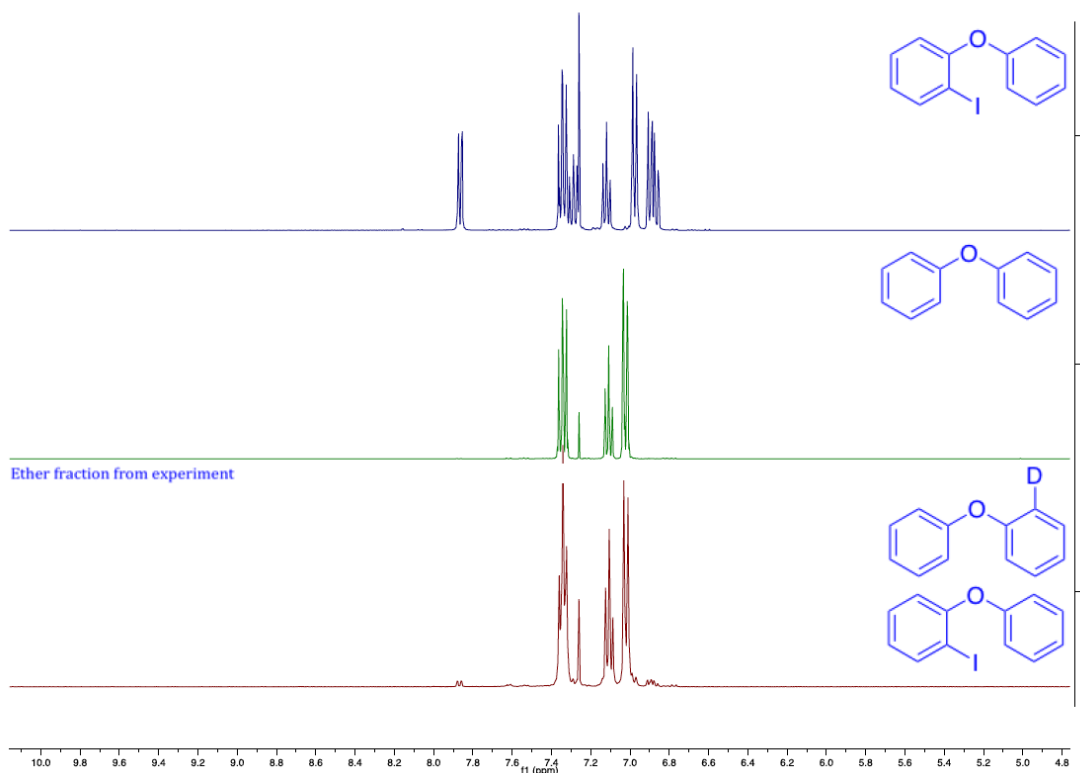

The incorporation of deuterium was clearly seen when the peaks of the product were integrated. The expected ratio 4:2:4 of **2f** was instead 4:2:3, indicating that a deuterium was incorporated in the *ortho*-position. This correlates well to spectral data for **2f-D** in the literature.<sup>[7]</sup>

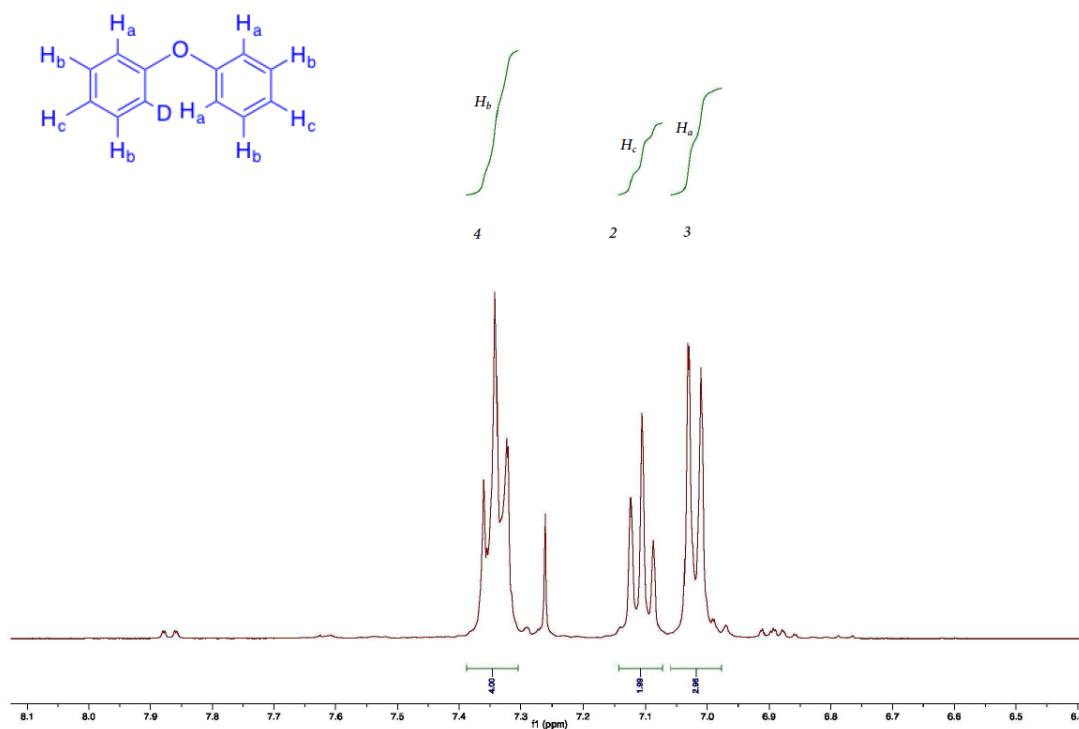

### 3.9.2. Salt **1d-D** D<sub>2</sub>O with Trap

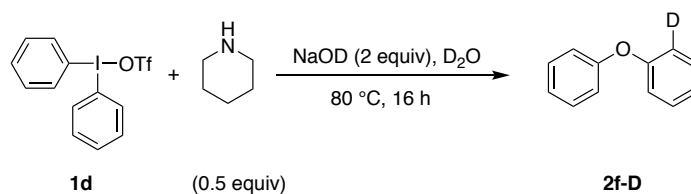

The reaction was performed according to general procedure B using **1d**. The crude was analyzed by GC-MS and a peak corresponding to product **2f-D** was detected. This means that piperidine did not fully suppress the aryne pathway in water.

### Diphenyl ether<sub>o-d1</sub> (**2f-D**)

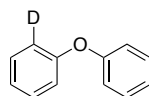

Spectral data corresponds to literature.<sup>[32]</sup>

### 3.9.3. Salt **1d-D** in CH<sub>2</sub>Cl<sub>2</sub> and H<sub>2</sub>O

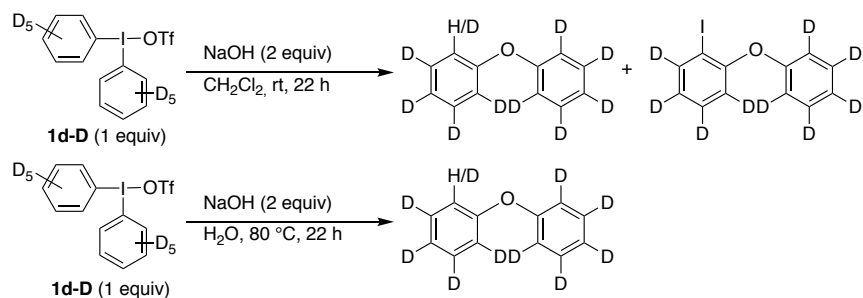

For comparison, the fully labeled salt **1d-D** was submitted to the general procedures A and B. After work-up and purification the ether fractions were compared. As can be seen in the <sup>13</sup>C NMR:s below there is more than one compound in the spectrum for the CH<sub>2</sub>Cl<sub>2</sub> reaction, and one compound is probably when iodine is incorporated into the *ortho*-position.

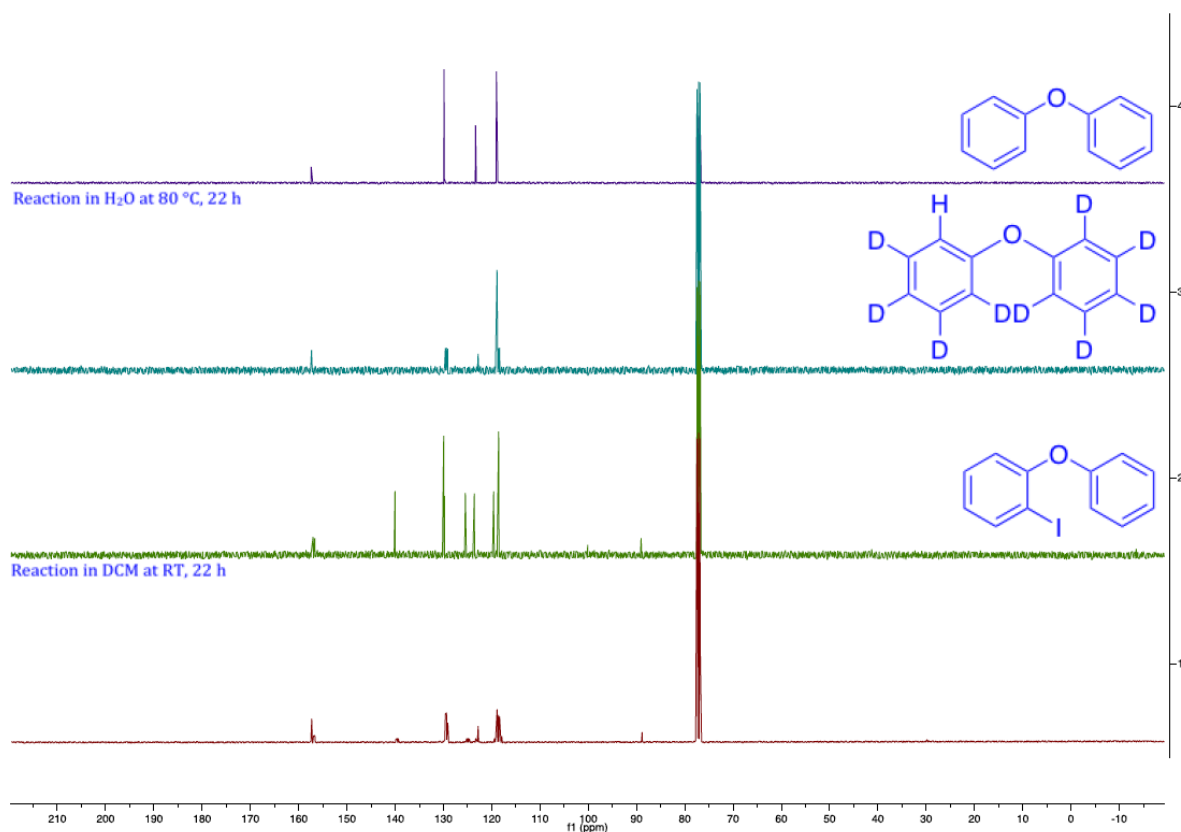

## 4. Arylation of Primary Alcohol 3a

### 4.1. General Procedure C

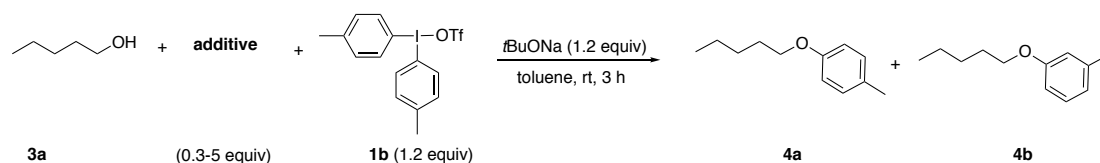

A dry 10 mL Schlenk tube was evacuated and backfilled with argon three times. *t*BuONa (58 mg, 0.6 mmol, 1.2 equiv) was added, followed by anhydrous toluene (1.5 mL). The mixture was cooled to 0 °C and 1-pentanol (54  $\mu$ L, 0.5 mmol, 1 equiv) was added and rinsed down using toluene (0.5 mL). After stirring at rt for 15 min the mixture was cooled to 0 °C and additive (0.3-5.0 equiv) was added followed by **1b** (275 mg, 0.6 mmol, 1.2 equiv). After rinsing down using toluene (0.5 mL) the mixture was left to stir at rt for 3 hours. The reaction was quenched using sat. NH<sub>4</sub>Cl, extracted with CH<sub>2</sub>Cl<sub>2</sub> (3x10 mL), dried over MgSO<sub>4</sub>, filtered and concentrated *in vacuo*. The crude was then submitted to flash column chromatography to obtain the product.

*NB! The oxidized product (1-pentanal) has a boiling point of 102-103 °C, and is therefore difficult to study.*

### 4.2. Identification of By-Products

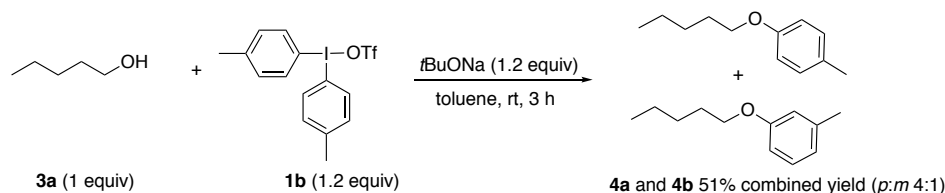

The reaction was performed according to the general procedure C. The ethers were isolated as a mixture, and the ratio was determined via <sup>1</sup>H NMR.

### 4.3. Trapping of Aryne with Furan

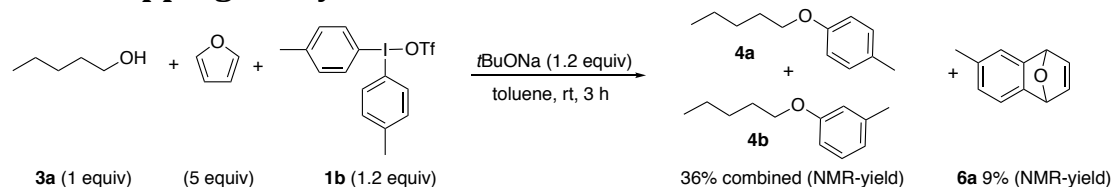

The reaction was performed according to the general procedure C using furan as additive. *Modified work-up for <sup>1</sup>H NMR yield determination:* To the reaction mixture D<sub>2</sub>O (0.1 mL) was added and the mixture was then diluted with EtOAc. 1,3,5-trimethoxybenzene (0.5 mmol) was added as internal standard. A sample was taken, concentrated and then evaluated by <sup>1</sup>H NMR (CDCl<sub>3</sub>) to determine the yield and products that were formed. *Note: due to overlapping peaks in the crude, the ratio between **4a** and **4b** could not be determined.*

#### 4.4. Trapping of Aryne with Piperidine

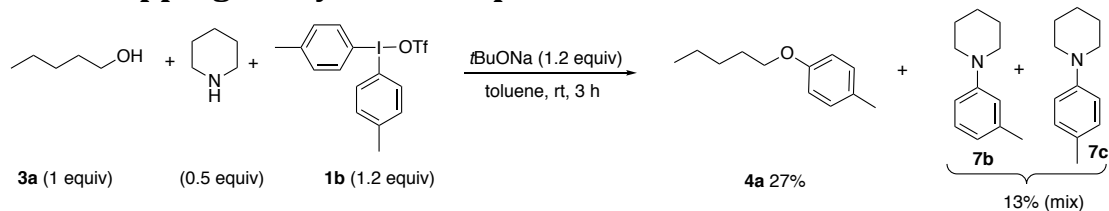

The reaction was performed according to the general procedure C using piperidine as additive. The crude product was purified using flash column chromatography ( $\text{SiO}_2$ , pentane  $\rightarrow$  2%  $\text{CH}_2\text{Cl}_2$  in pentane) to elute ether **4a** (25.8 mg, 0.14 mmol) in 27% yield. Then the eluent was changed (5% EtOAc in pentane  $\rightarrow$  10% EtOAc in pentane) to elute coupling products **7b** and **7c** (13.6 mg, 0.08 mmol, 1.3:1 *m:p*) in 13% yield.

The ether product **4a** was isolated as one regioisomer, but contained inseparable diaryl ether **2b** in a ratio of 1:0.08 (**4a:2b**).

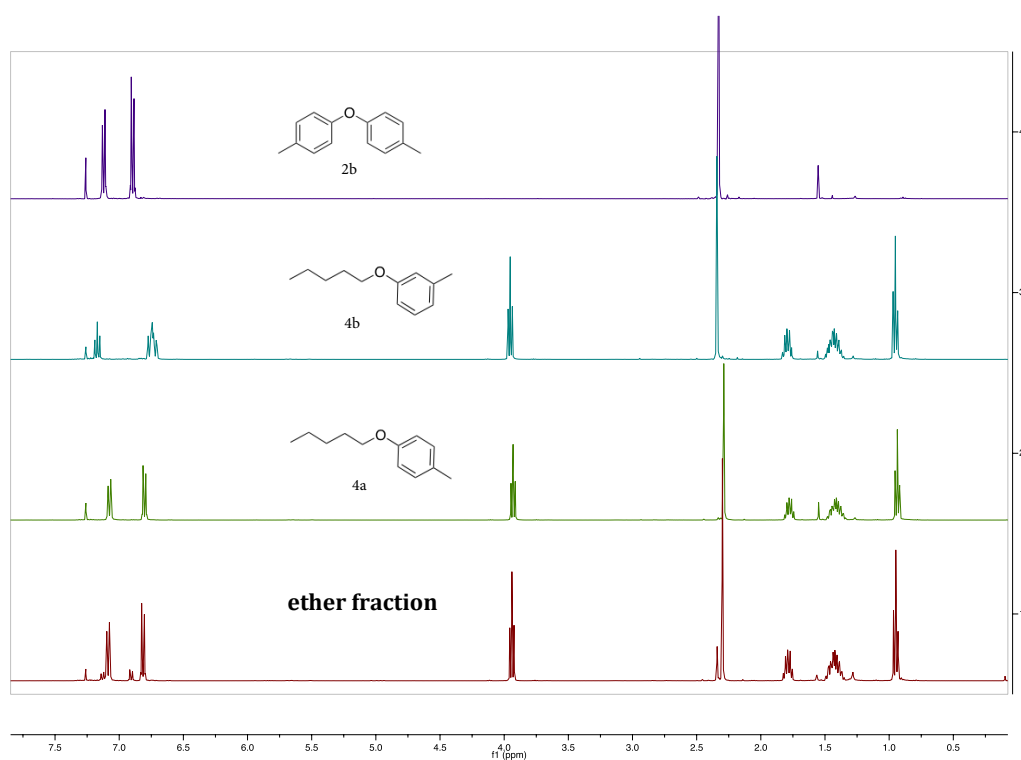

## 1-Tolylpiperidine (7b and 7c)

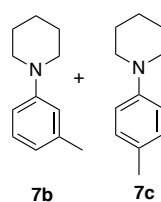

Isolated as a mixture (1.3:1 *m:p*). Spectral data are in agreement with published data,<sup>[33]</sup> except that one carbon peak in the *para*-regioisomer 7c at 129 ppm was difficult to assign due to overlapping and minor impurities.

## 4.5. Comparison with and without Aryne Trap

Comparing the ether fractions spectra with and without traps showed that the *meta*-isomer could not be seen when piperidine was added.

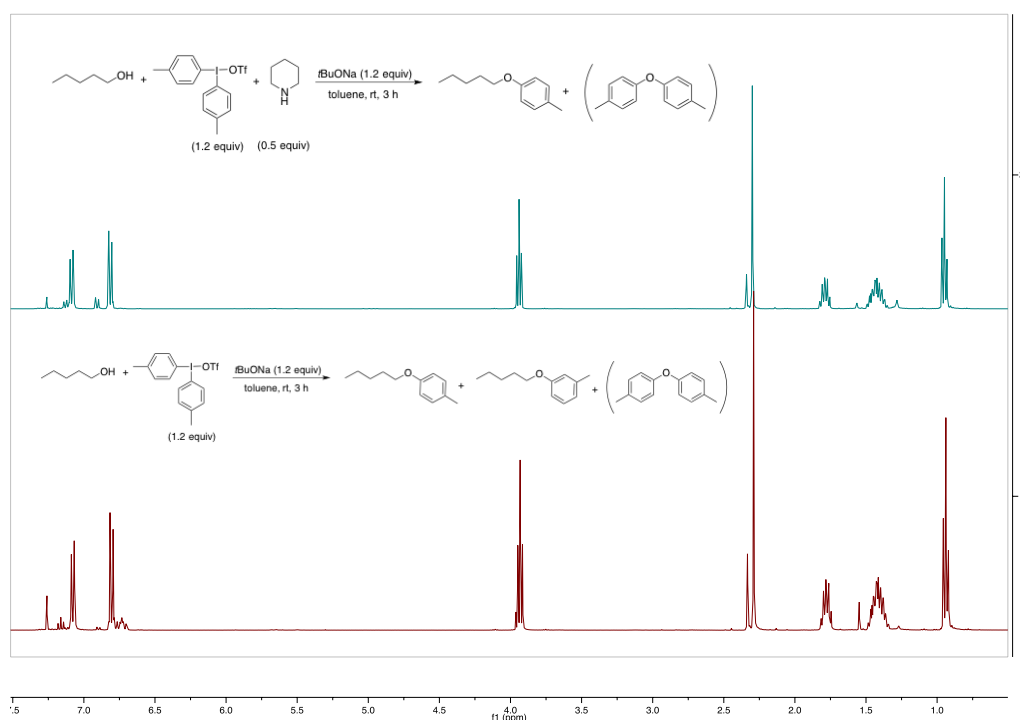

## 4.6. Screening of Amines as Aryne Trap

Different amines were screened as aryne trap, and piperidine was found to be superior. Morpholine was second best. *N*-Methylaniline was only tested in phenylation of hydroxides.

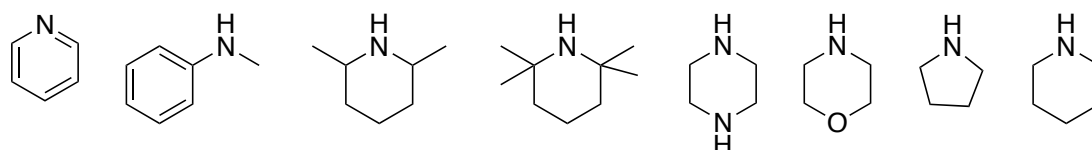



## 4.7. Comparing with Published Protocol

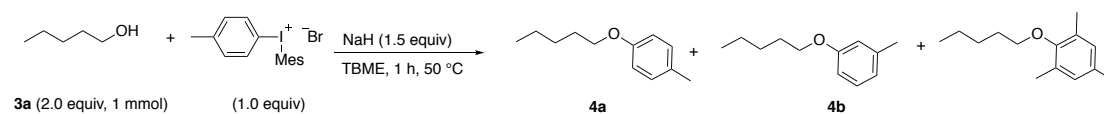

The reaction was performed according to a published procedure.<sup>[12]</sup> The crude residue was purified using flash chromatography (SiO<sub>2</sub>, using a gradient: pentane (100%) -> DCM (100%) -> pentane:EtOAc, 9:1) to yield an ether fraction containing several products. When overlapping with reference compounds it was seen that regioisomers **4a** and **4b** were present. It also seemed like the ether resulting from transfer of the mesityl was formed. This was further supported by GC-MS analysis.

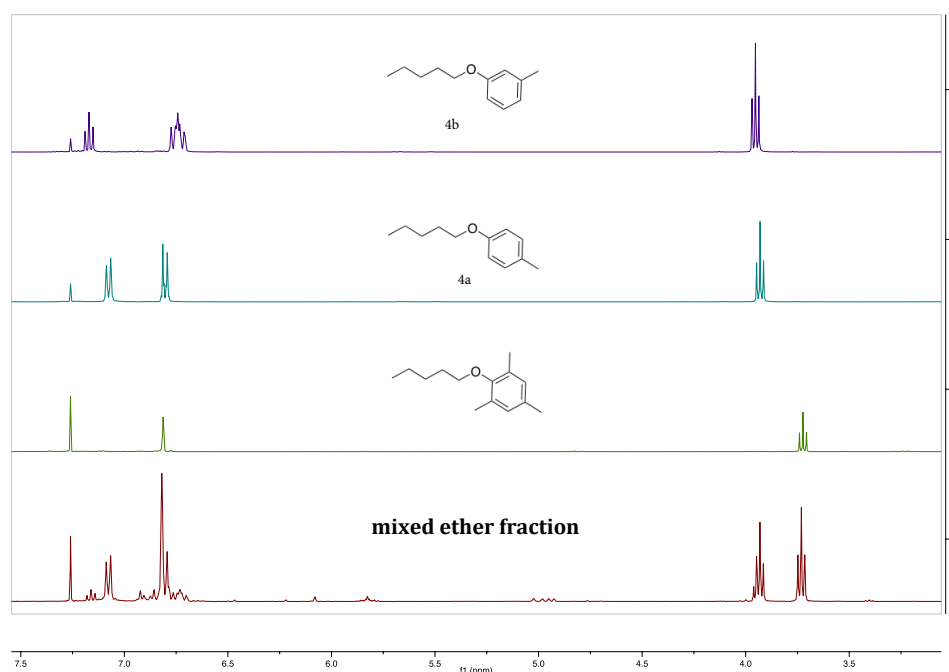

## GC-MS

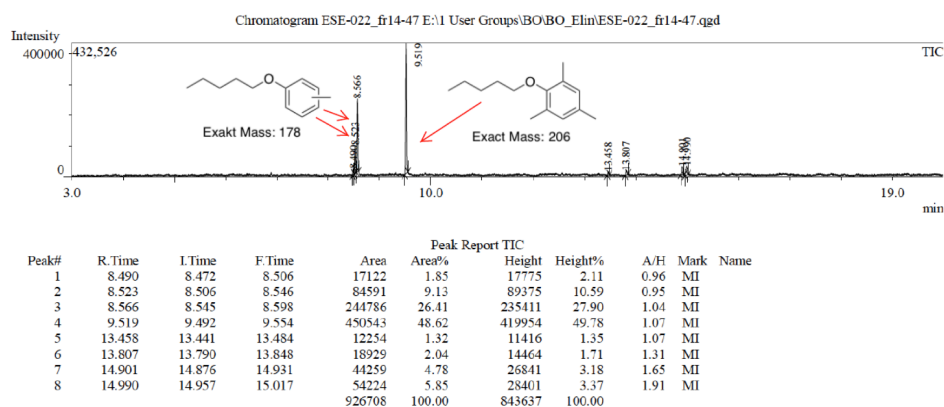

## 4.8. Analytical Data for Arylation of Primary Alcohols

### 1-Pentyloxy-4-toluene (4a)

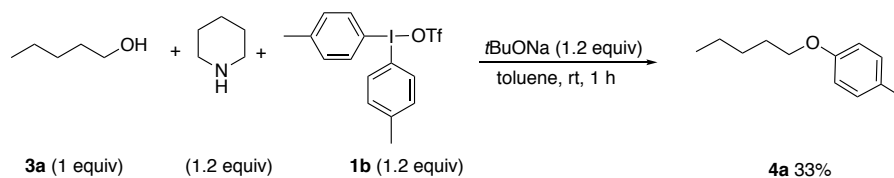

The reaction was performed according to the general procedure C. Isolated as a transparent oil 29 mg (33%).

$^1\text{H NMR}$  (400 MHz,  $\text{CDCl}_3$ )  $\delta$  7.11 – 7.04 (m, 2H), 6.83 – 6.78 (m, 2H), 3.93 (t,  $J$  = 6.6 Hz, 2H), 2.29 (s, 3H), 1.85 – 1.72 (m, 2H), 1.50 – 1.34 (m, 4H), 0.94 (t,  $J$  = 7.1 Hz, 3H).

$^{13}\text{C NMR}$  (101 MHz,  $\text{CDCl}_3$ )  $\delta$  157.15, 129.97, 129.76, 114.50, 68.20, 29.19, 28.38, 22.63, 20.60, 14.18.

HRMS (APCI); calcd for  $\text{C}_{12}\text{H}_{19}\text{O}$  ( $\text{M}+\text{H}$ ): 179.1430 found: 179.1428

### 1-Pentyloxy-3-toluene (4b)

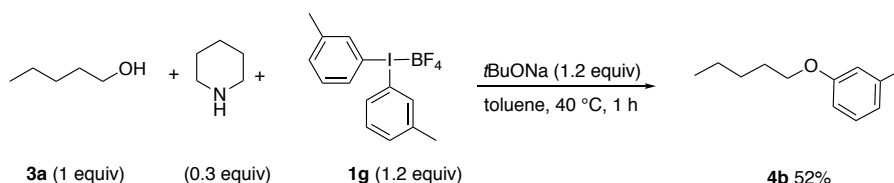

The reaction was performed according to the general procedure C. Isolated as transparent oil in 46 mg (52%).

$^1\text{H NMR}$  (400 MHz,  $\text{CDCl}_3$ )  $\delta$  7.17 (t,  $J$  = 7.7 Hz, 1H), 6.79 – 6.69 (m, 3H), 3.95 (t,  $J$  = 6.6 Hz, 2H), 2.34 (s, 3H), 1.86 – 1.73 (m, 2H), 1.52 – 1.35 (m, 4H), 0.95 (t,  $J$  = 7.1 Hz, 3H).

$^{13}\text{C NMR}$  (101 MHz,  $\text{CDCl}_3$ )  $\delta$  159.31, 139.53, 129.27, 121.41, 119.68, 115.52, 111.48, 67.96, 29.19, 28.39, 22.63, 21.67, 14.18.

HRMS (APCI); calcd for  $\text{C}_{12}\text{H}_{19}\text{O}$  ( $\text{M}+\text{H}$ ): 179.1430 found: 179.1422

## 4.9. Other Salts with 1-Pentanol

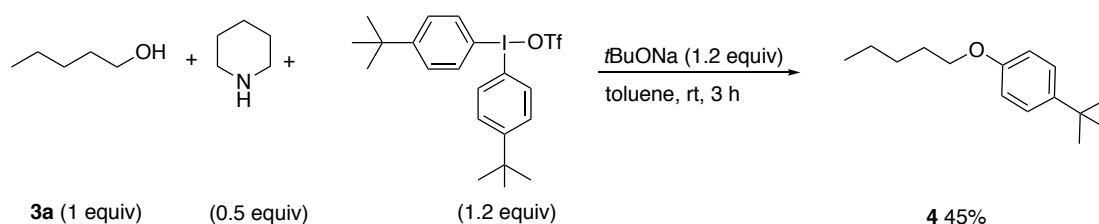

The reaction was performed according to the general procedure C. Isolated as transparent oil in 50 mg (45%).

$^1\text{H NMR}$  (400 MHz, Chloroform-*d*)  $\delta$  7.32 (d,  $J = 8.5$  Hz, 2H), 6.86 (d,  $J = 8.5$  Hz, 2H), 3.96 (t,  $J = 6.6$  Hz, 2H), 1.80 (p,  $J = 6.8$  Hz, 2H), 1.52 – 1.38 (m, 4H), 1.33 (s, 9H), 0.96 (t,  $J = 7.0$  Hz, 3H).

$^{13}\text{C NMR}$  (101 MHz,  $\text{CDCl}_3$ )  $\delta$  157.03, 143.21, 126.29, 114.06, 68.06, 34.18, 31.69, 29.22, 28.41, 22.63, 14.19.

HRMS (APCI); calcd for  $\text{C}_{15}\text{H}_{25}\text{O}$  (M+H): 221.1900 found: 221.1906

Reaction was performed with a bromo substituted diaryliodonium salt. The outcome showed that with piperidine as additive, the reaction was cleaner.

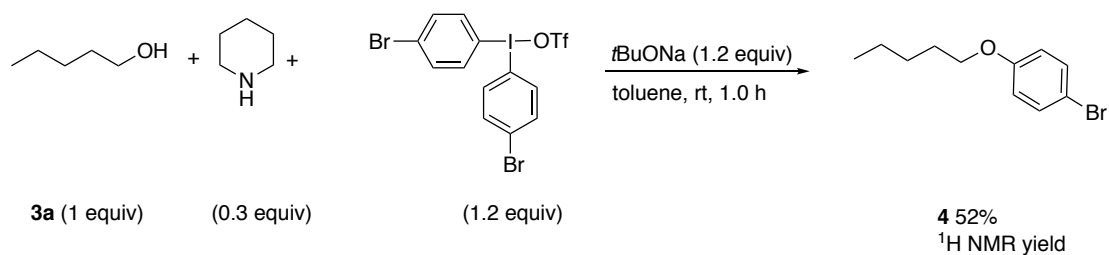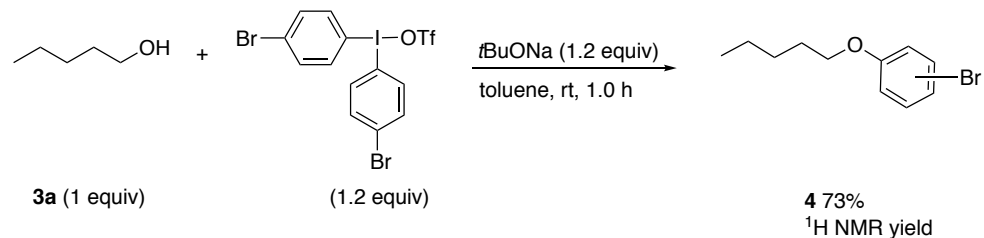

## 5. Arylation of Secondary Alcohols 3b and 3b-D

### 5.1. General Procedure for Arylation of Secondary Alcohols

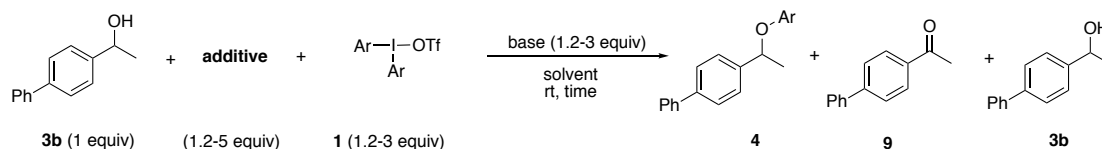

#### 5.1.1. General Procedure D

A dry 10 mL Schlenk tube was evacuated and backfilled with argon three times. *t*BuONa (1.2 equiv) was added followed by anhydrous toluene or THF (1 mL). The mixture was cooled to 0 °C and the alcohol **3b** (40 mg, 0.20 mmol, 1 equiv) was added and rinsed down using toluene or THF (0.5 mL). The mixture was stirred at rt for 15 min and then cooled to 0 °C. Additive (1.2-5 equiv) and diaryliodonium salt **1** (1.2 equiv) were added and rinsed down using toluene (0.5 mL). The reaction mixture was stirred at rt for 90 min.

##### *Work-up <sup>1</sup>H NMR yield:*

The mixture was quenched with D<sub>2</sub>O (0.1 mL) and diluted with EtOAc. 1,3,5-trimethoxybenzene (0.2 mmol) was added as internal standard. The mixture was stirred for 5 min, then allowed to settle, a sample was taken, concentrated and then evaluated by <sup>1</sup>H NMR (CDCl<sub>3</sub>) to determine the yield and products that had formed.

##### *Work-up isolated reactions:*

The reaction was quenched with sat. NH<sub>4</sub>Cl, extracted with CH<sub>2</sub>Cl<sub>2</sub> (x3), dried over MgSO<sub>4</sub>, filtered and concentrated *in vacuo*. The crude was purified using flash column chromatography, either using ISCO CombiFlash or manual flash chromatography.

#### 5.1.2. General Procedure E

A dry 10 mL Schlenk tube was evacuated and backfilled with argon three times, then charged with alcohol **3b** (40 mg, 0.20 mmol, 1 equiv). Pentane (1 mL) was added and the mixture was cooled to 0 °C. NaHMDS (0.6 M in toluene, 1.0 equiv, 0.34 mL) was added dropwise and then the reaction mixture was stirred at rt for 10 min before the diaryliodonium salt **1** (0.20 mmol, 1 equiv) and pentane (1 mL) were added. The reaction was stirred at rt for 90 min.

The mixture was quenched with D<sub>2</sub>O (0.1 mL) and diluted with EtOAc. 1,3,5-trimethoxybenzene (0.2 mmol) was added as internal standard. The mixture was stirred for 5 min, then allowed to settle, a sample was taken, concentrated and then evaluated by <sup>1</sup>H NMR (CDCl<sub>3</sub>) to determine the yield and products that had formed.

## 5.2. Trapping of Benzyne with Furan

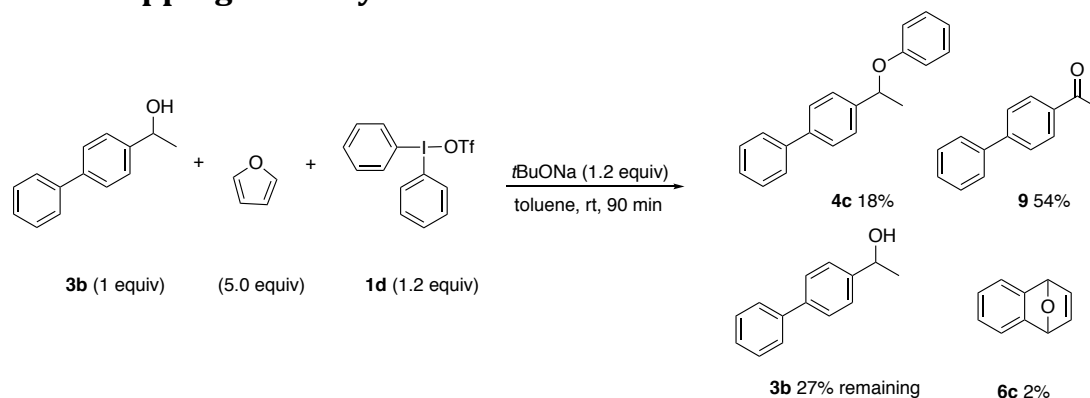

The reaction was performed according to general procedure D using salt **1d**, with furan (5 equiv) as additive. Yields were determined with  $^1\text{H}$  NMR analysis.

## 5.3. Effect of Radical Traps

### 5.3.1. DPE in Toluene

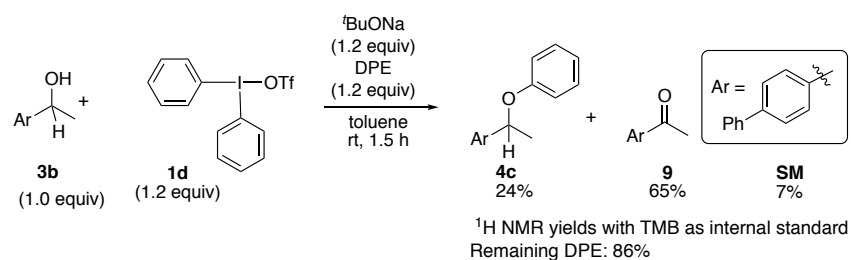

The reaction was performed according to general procedure D using salt **1d**, with DPE (1.2 equiv) as additive. Yields were determined with  $^1\text{H}$  NMR analysis.

### 5.3.2. Reaction in THF

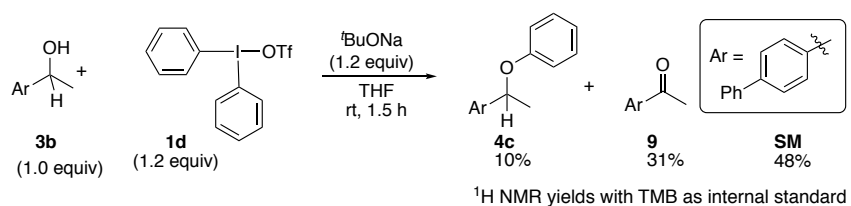

The reaction was performed according to general procedure D using salt **1d**. Yields were determined with  $^1\text{H}$  NMR analysis.

### 5.3.3. DPE in THF

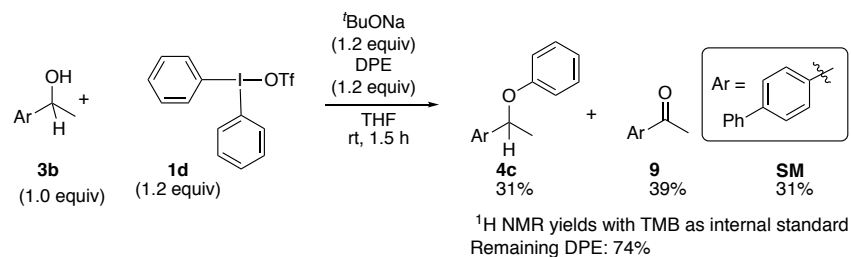

The reaction was performed according to general procedure D using salt **1d** with DPE (1.2 equiv) as additive. Yields were determined with <sup>1</sup>H NMR analysis.

### 5.3.4. TEMPO in THF

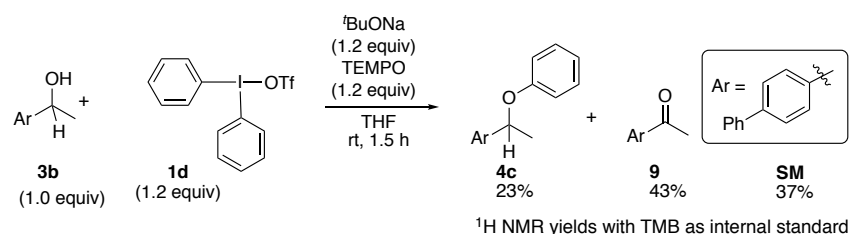

The reaction was performed according to general procedure D using salt **1d** with TEMPO (1.2 equiv) as additive. Yields were determined with <sup>1</sup>H NMR analysis.

## 5.4. Comparing Oxidation with Published Protocols

### 5.4.1. Reaction with Salt 1f

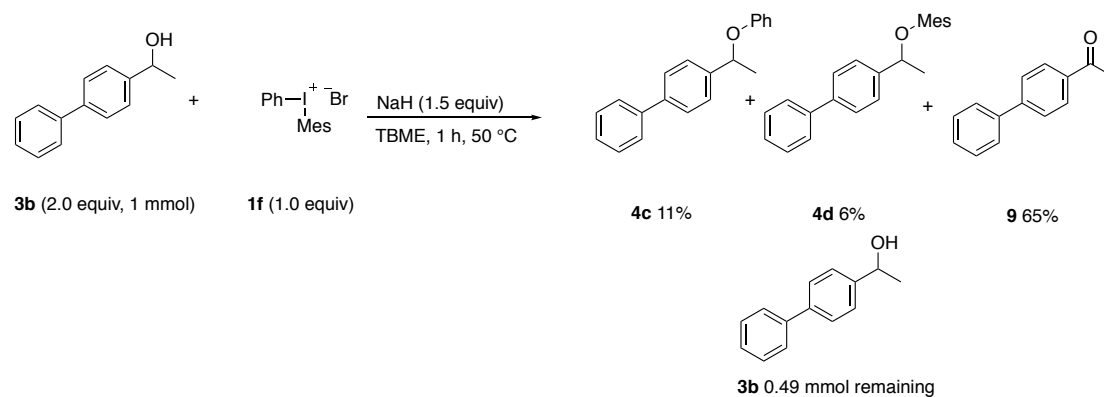

The reaction was performed according to a literature procedure.<sup>[34]</sup> The products were isolated using flash chromatography (ISCO CombiFlash, 12 g column, gradient of pentane:EtOAc 0-75:25, 25 CV).

### 5.4.2. Reaction with Salt 1e

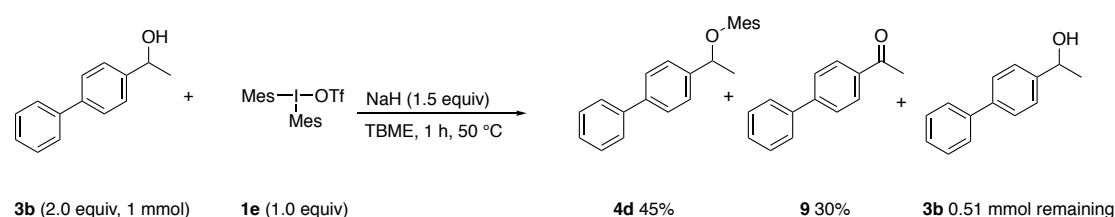

The reaction was performed according to a literature procedure.<sup>[34]</sup> The products were isolated using flash chromatography (ISCO CombiFlash, 12 g column, gradient of pentane:EtOAc 0-75:25, 25 CV).

### 5.4.3. Reaction with Salt 1d

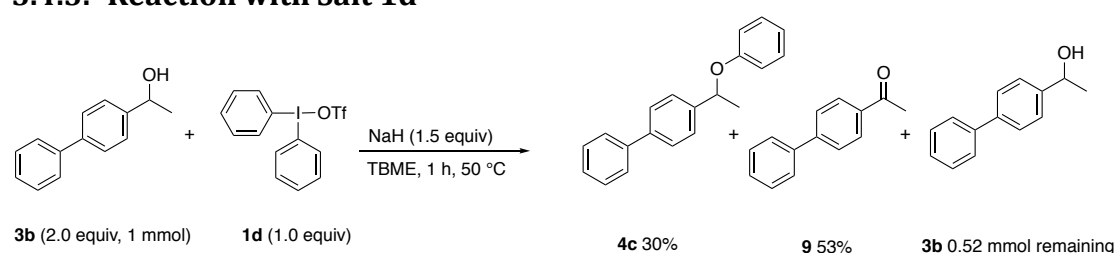

The reaction was performed according to a literature procedure.<sup>[34]</sup> The products were isolated using flash chromatography (ISCO CombiFlash, 12 g column, gradient of pentane:EtOAc 0-75:25, 25 CV).

## 5.5. Oxidation Mechanism with Salt 1e

In order to investigate the oxidation mechanism without aryne interference, salt **1e** was selected. Dilution and excess base did not affect the reaction outcome to any great extent. In toluene, the reactions were not homogenous, and therefore a mixture of toluene and DMF were used. Diluting the reaction did not affect the outcome, however, excess base lowered both the formation of ether and the ketone.

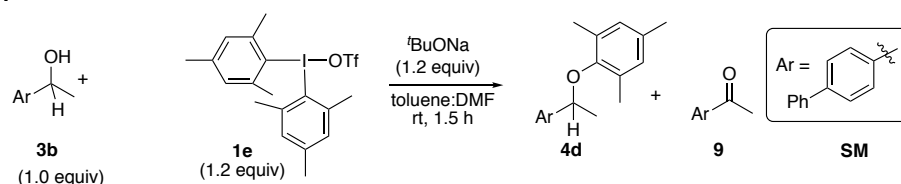

| Entry          | NaO <sup>t</sup> Bu (equiv) | M (mmol/mL) | Ratio<br>toluene:DMF | 4d | 9               | 3b |
|----------------|-----------------------------|-------------|----------------------|----|-----------------|----|
| 1 <sup>a</sup> | 1.2                         | 0.1         | Only toluene         | 40 | 32 <sup>b</sup> | 19 |
| 2 <sup>a</sup> | 1.2                         | 0.02        | Only toluene         | 41 | 34              | 24 |
| 3 <sup>a</sup> | 2.0                         | 0.1         | Only toluene         | 44 | 32              | 20 |
| 4 <sup>b</sup> | 1.2                         | 0.1         | 7.3:1                | 35 | 28              | 26 |
| 5 <sup>b</sup> | 1.2                         | 0.02        | 41:1                 | 39 | 31              | 18 |
| 6 <sup>b</sup> | 1.2                         | 0.02        | 7.3:1                | 43 | 29              | 20 |
| 7 <sup>b</sup> | 2.2                         | 0.1         | 7.3:1                | 21 | 13              | 33 |

<sup>a</sup> Isolated yields. <sup>b</sup> H NMR yields using 1,3,5-trimethoxybenzene as internal standard.

## 5.6. Oxidation Mechanism with Salt **1e** and **3b-D**

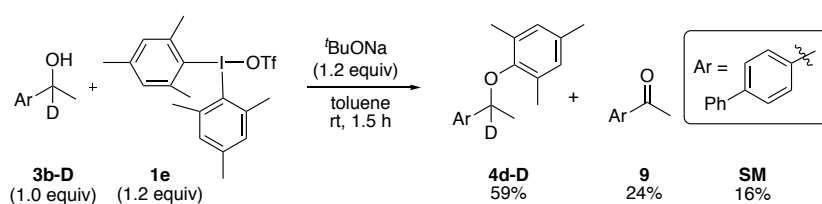

The reaction was performed according to general procedure D using salt **1e** with. The products were isolated using flash chromatography (ISCO CombiFlash, 12 g column, gradient of pentane:EtOAc 0->75:25, 25 CV).

Submitting this reaction to GC-MS analysis showed a peak with a mass corresponding to deuterated mesitylene.

## 5.7. Competition Experiments

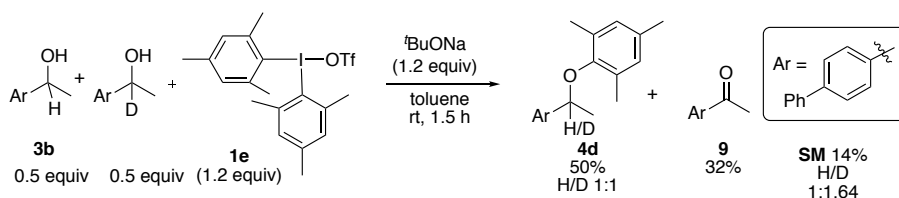

The reaction was performed according to general procedure D using salt **1e** with. The products were isolated using flash chromatography (ISCO CombiFlash, 12 g column, gradient of pentane:EtOAc 0->75:25, 25 CV).

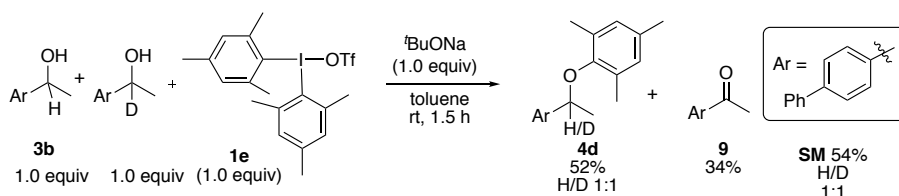

The reaction was performed according to general procedure D using salt **1e** with. The products were isolated using flash chromatography (ISCO CombiFlash, 12 g column, gradient of pentane:EtOAc 0->75:25, 25 CV).



## 5.8. Analytical Data for Arylation of Secondary Alcohols

### 4(1-Phenoxyethyl)-1,1'-biphenyl (4c)

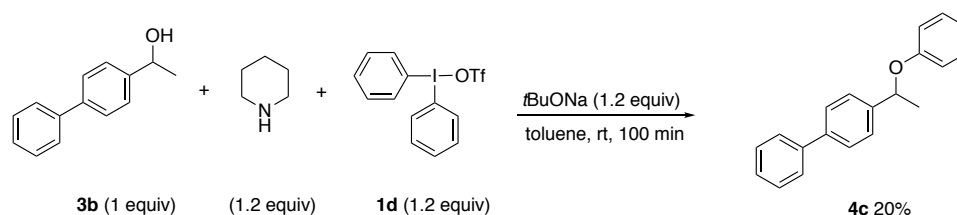

The reaction was performed according to general procedure **D** on a 0.5 mmol scale, using piperidine (1.2 equiv) as additive. The reaction was stirred at rt for 100 min and quenched using HCl (3M, aq). The organic phase was washed three times with HCl (3M, aq), then with brine and dried over MgSO<sub>4</sub>. The solution was filtered and concentrated *in vacuo*. The crude was purified using flash column chromatography (silica, gradient pentane → 16% CH<sub>2</sub>Cl<sub>2</sub> in pentane). The product was obtained as colorless crystals (27.1 mg, 0.10 mmol) in 20% yield.

mp = 94-96 °C

<sup>1</sup>H NMR (CDCl<sub>3</sub>, 400 MHz): δ 7.63-7.55 (m, 4H), 7.50-7.41 (m, 4H), 7.39-7.32 (m, 1H), 7.28-2.20 (m, 2H), 6.96-6.88 (m, 3H), 5.39 (q, *J* = 6.4 Hz, 1H), 1.70 (d, *J* = 6.5 Hz, 3H).

<sup>13</sup>C NMR (CDCl<sub>3</sub>, 100 MHz): δ 158.1, 142.4, 140.9, 140.5, 129.5, 128.9, 127.5, 127.4, 127.2, 126.1, 120.8, 116.1, 75.8, 24.6.

HRMS (ESI): calcd for C<sub>20</sub>H<sub>18</sub>ONa [M+Na]<sup>+</sup>: 297.1250; found: 297.1249.

### 4(1-(2-Iodophenoxy)ethyl)-1,1'-biphenyl (4e)

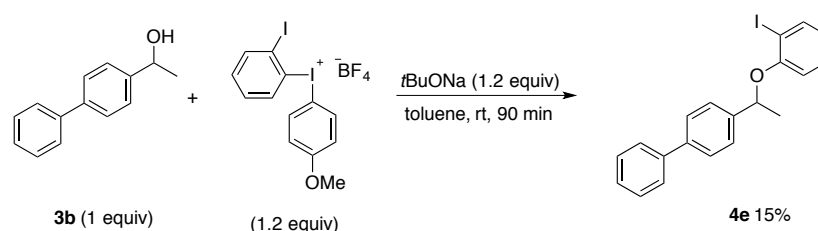

The reaction was performed according to general procedure **D** on 0.5 mmol scale. The crude was purified using flash column chromatography (silica, gradient pentane → 2% EtOAc in pentane). The product contained some impurities and was submitted to a second flash column chromatography (silica, gradient pentane → 10% CH<sub>2</sub>Cl<sub>2</sub> in pentane). The product was obtained as a colorless oil that solidified upon standing (30.9 mg, 0.08 mmol) in 15% yield.

mp = 93-95 °C

$^1\text{H}$  NMR ( $\text{CDCl}_3$ , 400 MHz):  $\delta$  7.79 (dd,  $J = 7.8, 1.6$  Hz, 1H), 7.62-7.55 (m, 4H), 7.52-7.41 (m, 4H), 7.39-7.32 (m, 1H), 7.16 (ddd,  $J = 8.2, 7.3, 1.6$  Hz, 1H), 6.71 (dd,  $J = 8.3, 1.4$  Hz, 1H), 6.66 (td,  $J = 7.6, 1.4$  Hz, 1H), 5.42 (q,  $J = 6.4$  Hz, 1H), 1.75 (d,  $J = 6.4$  Hz, 3H).

$^{13}\text{C}$  NMR ( $\text{CDCl}_3$ , 100 MHz):  $\delta$  156.5, 141.7, 140.8, 140.6, 139.6, 129.3, 128.9, 127.5, 127.4, 127.2, 126.2, 122.6, 114.2, 87.8, 77.2, 24.6.

HRMS (ESI): calcd for  $\text{C}_{20}\text{H}_{17}\text{IONa}$  [ $\text{M}+\text{Na}$ ] $^+$ : 423.0216; found: 423.0208.

#### 4-(1-(Mesityloxy)ethyl)-1,1'-biphenyl (**4d**)

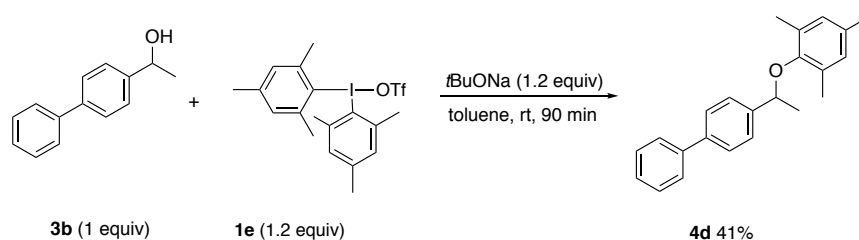

The reaction was performed according to the general procedure **D**. The crude residue was purified using flash chromatography (ISCO CombiFlash, 12 g column, gradient of pentane:EtOAc 0- $\rightarrow$ 75:25, 25 CV). The desired ether **4d** was isolated in 32 mg (41%) as transparent oil, which solidified upon standing.

mp = 61-63  $^{\circ}\text{C}$

$^1\text{H}$  NMR (400 MHz,  $\text{CDCl}_3$ )  $\delta$  7.65-7.57 (m, 4H), 7.53-7.42 (m, 4H), 7.39-7.32 (m, 1H), 6.81 (s, 2H), 4.96 (q,  $J = 6.5$  Hz, 1H), 2.25 (s, 3H), 2.15 (s, 6H), 1.64 (d,  $J = 6.5$  Hz, 3H)

$^{13}\text{C}$  NMR (100 MHz,  $\text{CDCl}_3$ )  $\delta$  152.8, 142.2, 141.0, 140.7, 132.7, 131.1, 129.6, 128.9, 127.4, 127.2, 127.2, 127.2, 80.1, 22.4, 20.8, 17.3

HRMS (ESI): calcd for  $\text{C}_{23}\text{H}_{24}\text{NaO}$  [ $\text{M}+\text{Na}$ ] $^+$ : 339.1719; found: 339.1716 .

#### 4-(1-(Mesityloxy)ethyl-1-*d*)-1,1'-biphenyl (**4d-D**)

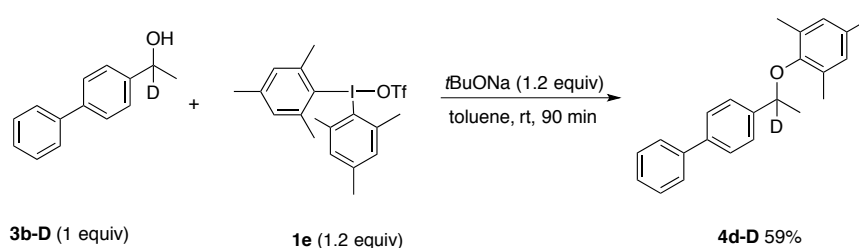

The reaction was performed according to general procedure **D**. The crude residue was purified using flash chromatography (ISCO CombiFlash, 12 g column, gradient of pentane:EtOAc 0- $\rightarrow$ 75:25, 25 CV). The desired ether **4d-D** was isolated in 94 mg (59%) as transparent oil, which solidified upon standing.

mp = 58-60  $^{\circ}\text{C}$

$^1\text{H}$  NMR (400 MHz,  $\text{CDCl}_3$ )  $\delta$  7.65-7.57 (m, 4H), 7.53-7.42 (m, 4H), 7.40-7.33 (m, 1H), 6.81 (s, 2H), 2.25 (s, 3H), 2.15 (s, 6H), 1.63 (s, 3H). *Traces of the non-deuterated ether, same amount as in the alcohol, quartet at 4.96.*

$^{13}\text{C}$  NMR (100 MHz,  $\text{CDCl}_3$ )  $\delta$  152.8, 142.2, 141.0, 140.8, 132.8, 131.1, 129.6, 128.9, 127.4, 127.2, 127.2, 127.1, 80.1 (from H alcohol), 79.7 (t), 22.3, 20.8, 17.3.

HRMS (ESI): calcd for  $\text{C}_{23}\text{H}_{23}\text{DNaO}$   $[\text{M}+\text{Na}]^+$ : 340.1782; found: 340.1775 .

## 6. Computational Details

Calculations were performed using the Gaussian09 package<sup>[35]</sup>. Optimization was generally done using the Becke Three-Parameter Lee-Yang-Parr functional<sup>[36]</sup> with the class III correction to dispersion by Grimme<sup>[37]</sup> (B3LYP-D3). The Minnesota functional (M06-2X)<sup>[38]</sup> was also used as comparison in a few cases, which will be stated when necessary. The SDD basis set with an applied effective core potential (MWB46) was used for iodine,<sup>[39]</sup> Pople's triple-zeta basis set with polarization and diffusion functions (6-311+G(d,p))<sup>[40]</sup> were used for N, O, F, Cl and Na atoms while the triple-zeta basis set with polarization (6-311G(d,p))<sup>[40b, c]</sup> were used for H-, C- and S-atoms. All structures were optimized in the respective solvent (CH<sub>2</sub>Cl<sub>2</sub>, water or toluene) using the polarizable continuum model (PCM, Surface=SES, Radii=UFF).<sup>[41]</sup> A vibrational analysis was conducted to verify a lowest energy structure or in some cases to verify a transition state as indicated by a single imaginary frequency. All energies are given in kJ/mol.

## 7. Arylation of Hydroxide

The Minnesota functional (M06-2X) was initially chosen as our method to study the system (Scheme S1) based on previous studies in the group.<sup>[42]</sup> Toluene was used as the solvent based on early results from the arylation of secondary alcohols (*vide infra*).

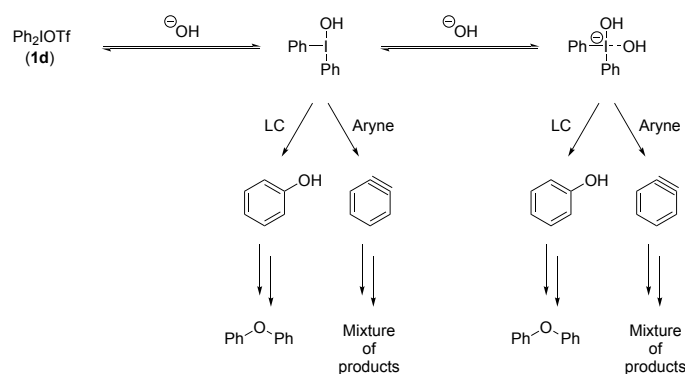

Scheme S1 General depiction of the analyzed reaction. The steps studied are the aryne formation and the ligand coupling (LC).

### 7.1. Diphenyliodonium Triflate (1d) and Hydroxide in Toluene (M06-2X)

Addition of hydroxides to **1d** leads to a large decrease in energy to form the stable intermediate **1d-(OH)<sub>2</sub>** (-182 kJ/mol). Due to the fast equilibrium between **1d-(OH)OH** and **1d-(OH)<sub>2</sub>** all transition state energies are calculated from the lowest intermediate according to the Curtin-Hammet principle. The external aryne formation via **TS1-1d** (+33 kJ/mol) is heavily favored over other TSs for aryne formation and ligand coupling (Figure S1).

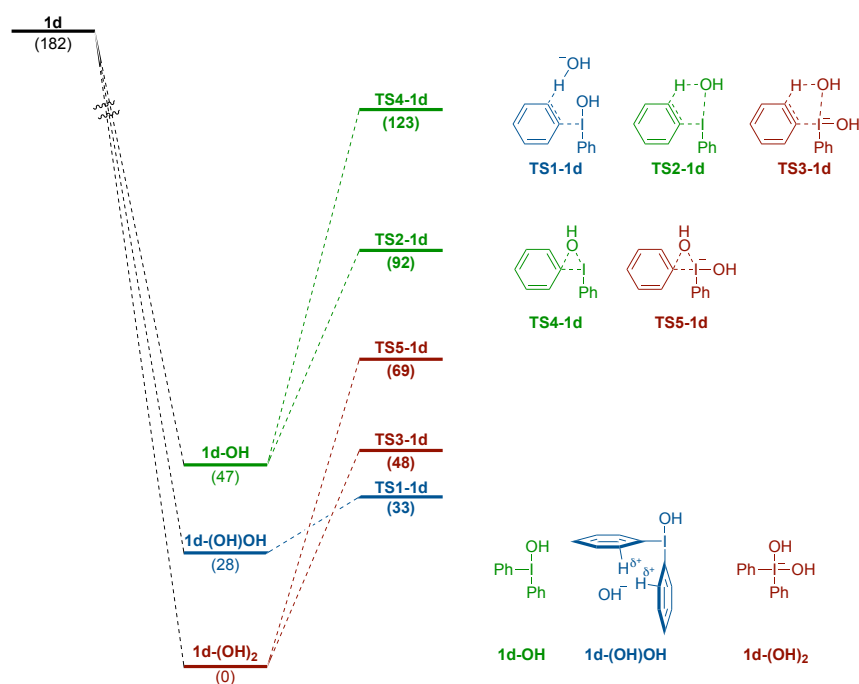

Figure S1. Free energy surface of the reaction between **1d** and hydroxide in toluene using M06-2X. Free triflates and hydroxides are omitted for clarity.

## 7.2. Electronic Effects of Ar<sub>2</sub>IOTf with Hydroxide in Toluene (M06-2X)

The product distribution (aryne vs. ligand coupling) was experimentally seen to drastically change based on the substituent on the iodonium salt. Employing the electron-rich salt **1c** to the reaction with sodium hydroxide in the presence of furan furnished exclusively the Diels-Alder (DA) product **6b** derived from the formation of arynes (Figure S2a). However, when using the electron-poor salt **1a** under the same conditions, the major product was the diarylether **2a** as a single regioisomer (Figure S2b), which indicates that it forms via a ligand coupling and not via an aryne.

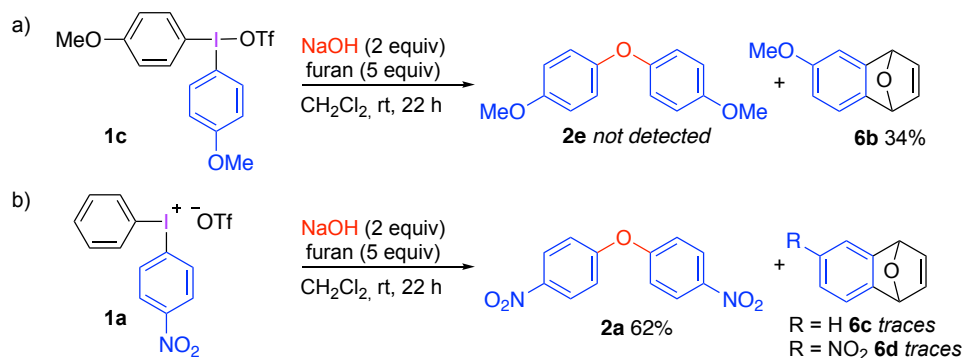

Scheme S2. (a) DA-adduct **6b** as the major product when using **1c** as the iodonium salt. (b) Diarylether **2a** as the major product when using iodonium salt **1a**.

The change in product distribution between **1a** and **1c** indicates large changes in the energies of the inherent transition states, hence, the energy difference between **TS4-1x** (3-coordinated ligand coupling) and **TS2-1x** (3-coordinated aryne formation) were investigated for a range of different substituents (Table S1). To our surprise, none of the investigated substitution patterns showed a preference for ligand coupling via **TS1** ( $\Delta\Delta G < 0$ ).

Table S1. Electronic effects on the energy difference between **TS2-1x** and **TS4-1x**

| R <sup>1</sup>  | R <sup>2</sup>  | x | $\Delta G$ ( <b>TS4-1x</b> ) | $\Delta G$ ( <b>TS2-1x</b> ) | $\Delta\Delta G$ ( <b>TS1-TS2</b> ) |
|-----------------|-----------------|---|------------------------------|------------------------------|-------------------------------------|
| NO <sub>2</sub> | H               | a | 60.7                         | 39.2                         | 21.6                                |
| CN              | H               | l | 61.2                         | 37.8                         | 23.4                                |
| H               | NO <sub>2</sub> | m | 81.0                         | 52.5                         | 28.4                                |
| H               | H               | d | 76.2                         | 45.1                         | 31.1                                |
| Cl              | Cl              | n | 79.1                         | 45.6                         | 33.5                                |
| F               | F               | o | 81.4                         | 45.3                         | 36.2                                |
| OMe             | OMe             | c | 87.0                         | 46.9                         | 40.1                                |

## 7.4. Solvation Effects of Ar<sub>2</sub>IOTf with Hydroxide (M06-2X)

Since we could not match the experimental selectivity between aryne formation and ligand coupling for **1a** and **1c** as shown in Scheme S2 we investigated the effect of the solvent on the energies (Table S2) on the 4-coordinated **TS3** (aryne) and **TS5** (LC). While the energy difference ( $\Delta\Delta G$ ) decreases, none of the entries shows a preference for substitution ( $\Delta\Delta G < 0$ ).

Table S2. Solvent effects on the energy difference between **TS3-1x** and **TS5-1x**

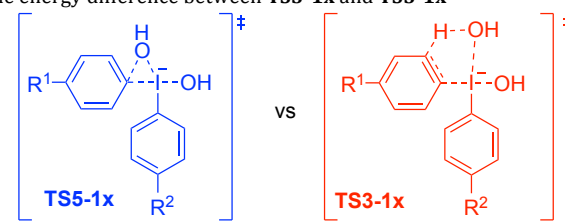

| R <sup>1</sup>        | R <sup>2</sup> | x | Solvent                         | $\Delta\Delta G$ | (TS5-<br>TS3) |
|-----------------------|----------------|---|---------------------------------|------------------|---------------|
| <b>NO<sub>2</sub></b> | H              | a | CH <sub>2</sub> Cl <sub>2</sub> | 6.8              |               |
| <b>NO<sub>2</sub></b> | H              | a | H <sub>2</sub> O                | 11.5             |               |
| <b>OMe</b>            | OMe            | c | CH <sub>2</sub> Cl <sub>2</sub> | 36.5             |               |
| <b>OMe</b>            | OMe            | c | H <sub>2</sub> O                | 43.1             |               |

We postulated that the inclusion of Na<sup>+</sup> (NaOH used as Nu) to these anionic systems could alter the selectivity (Table S3). No explicit solvation was included in these calculations. Unfortunately, the addition of Na<sup>+</sup> increased the gap ( $\Delta\Delta G$ ), *i.e.* aryne formation was even more favored and the energies resemble more those of 3-coordinated TSs, probably due the coordination of Na<sup>+</sup> to the “non-reacting” hydroxide, decreasing its coordinative ability to the iodonium.

Table S3. Effect of Na<sup>+</sup> on the energy difference between **TS3-1x-Na** and **TS5-1x-Na**.

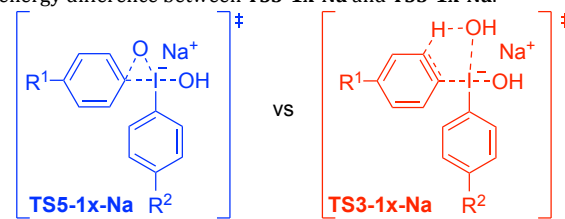

| R <sup>1</sup>        | R <sup>2</sup> | Solvent                         | $\Delta\Delta G$ | (TS5-<br>TS3) |
|-----------------------|----------------|---------------------------------|------------------|---------------|
| <b>NO<sub>2</sub></b> | H              | CH <sub>2</sub> Cl <sub>2</sub> | 24.9             |               |
| <b>NO<sub>2</sub></b> | H              | H <sub>2</sub> O                | 17.2             |               |
| <b>OMe</b>            | OMe            | CH <sub>2</sub> Cl <sub>2</sub> | 55.5             |               |
| <b>OMe</b>            | OMe            | H <sub>2</sub> O                | 42.2             |               |

## 7.5. Diphenyliodonium Triflate (**1d**) and Hydroxide in CH<sub>2</sub>Cl<sub>2</sub> and Water (B3LYP-D3)

Due to the difficulties in achieving the proper selectivity for the reaction shown above we tried using the B3LYP-D3 functional and initially we modeled the standard reaction between **1d** and hydroxide in CH<sub>2</sub>Cl<sub>2</sub> and water (Figure S2). In both solvents the preferred pathway is via the external elimination (**TS3-1d**, +43 kJ/mol [water], +33 kJ/mol [CH<sub>2</sub>Cl<sub>2</sub>]) similar to M06-2X in toluene (Figure S1).

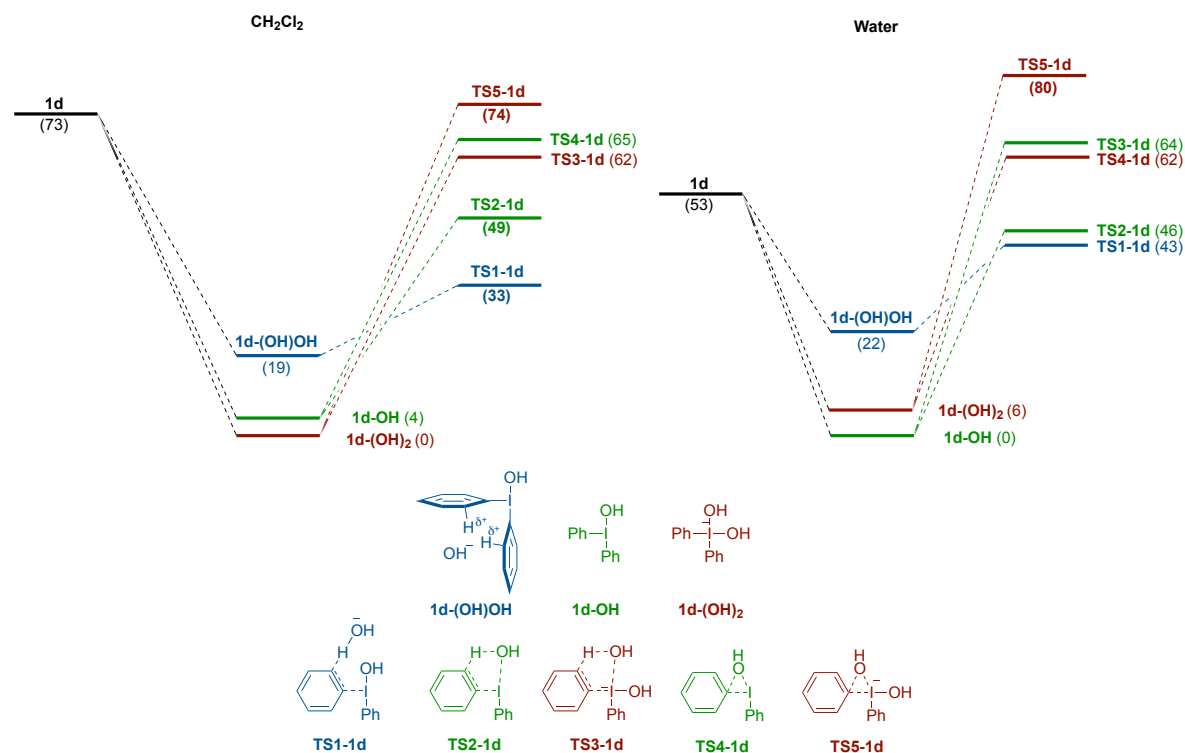

Figure S2. Free energy surface of the reaction between **1d** and hydroxide in CH<sub>2</sub>Cl<sub>2</sub> (left) and water (right) using B3LYP-D3. Free triflates and hydroxides are omitted for clarity.



## 7.6. *p*-Nitrophenyl(phenyl)iodonium Triflate (**1a**) and Hydroxide in CH<sub>2</sub>Cl<sub>2</sub> and Water (B3LYP-D3)

We then investigated the 3- and 4-coordinated TSs for elimination and substitution in various solvents. In water, elimination via **TS2-1a** is still favored by 5 kJ/mol (Scheme 3a). To our delight, the selectivity changed for the 4-coordinated TSs where substitution via **TS5-1a** is favored in both water (Scheme S3b, -3 kJ/mol) and in CH<sub>2</sub>Cl<sub>2</sub> (Scheme S3c, -9 kJ/mol).

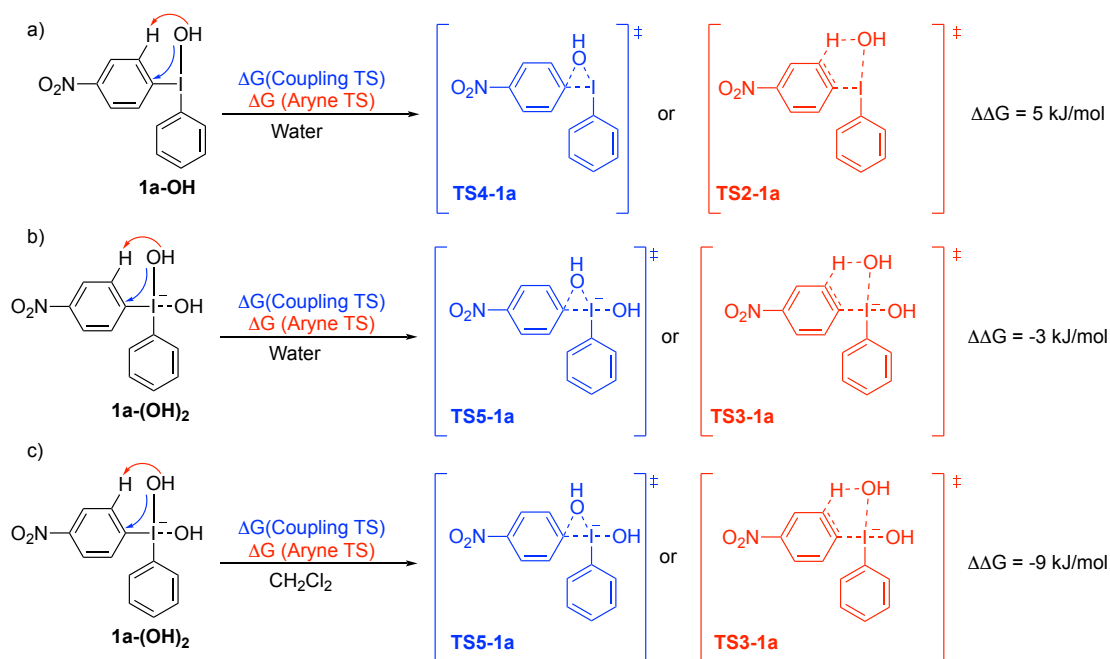

Scheme S3. Calculations using B3LYP-D3 (a) Energy difference between **TS4-1a** and **TS2-1a** in toluene. (b) Energy difference between **TS5-1a** and **TS3-1a** in water. (c) Energy difference between **TS5-1a** and **TS3-1a** in CH<sub>2</sub>Cl<sub>2</sub>.

However, the external elimination (**TS1-1a**) still had a lower barrier (+30 kJ/mol in CH<sub>2</sub>Cl<sub>2</sub>, +40 kJ/mol in water) than the 4-coordinated substitution via **TS5-1a** (+38 kJ/mol in CH<sub>2</sub>Cl<sub>2</sub>, +46 kJ/mol in water), which is depicted in the free energy surface in Figure S3. Surprisingly, the direct attack of the hydroxide on **1a**, without prior coordination to iodine, resulted in **TS6-1a** (+6 kJ/mol in CH<sub>2</sub>Cl<sub>2</sub>, +28 kJ/mol in water) that is lower in energy than that of the external elimination (**TS3-1a**) in both water and CH<sub>2</sub>Cl<sub>2</sub>, which explains the selectivity seen experimentally.

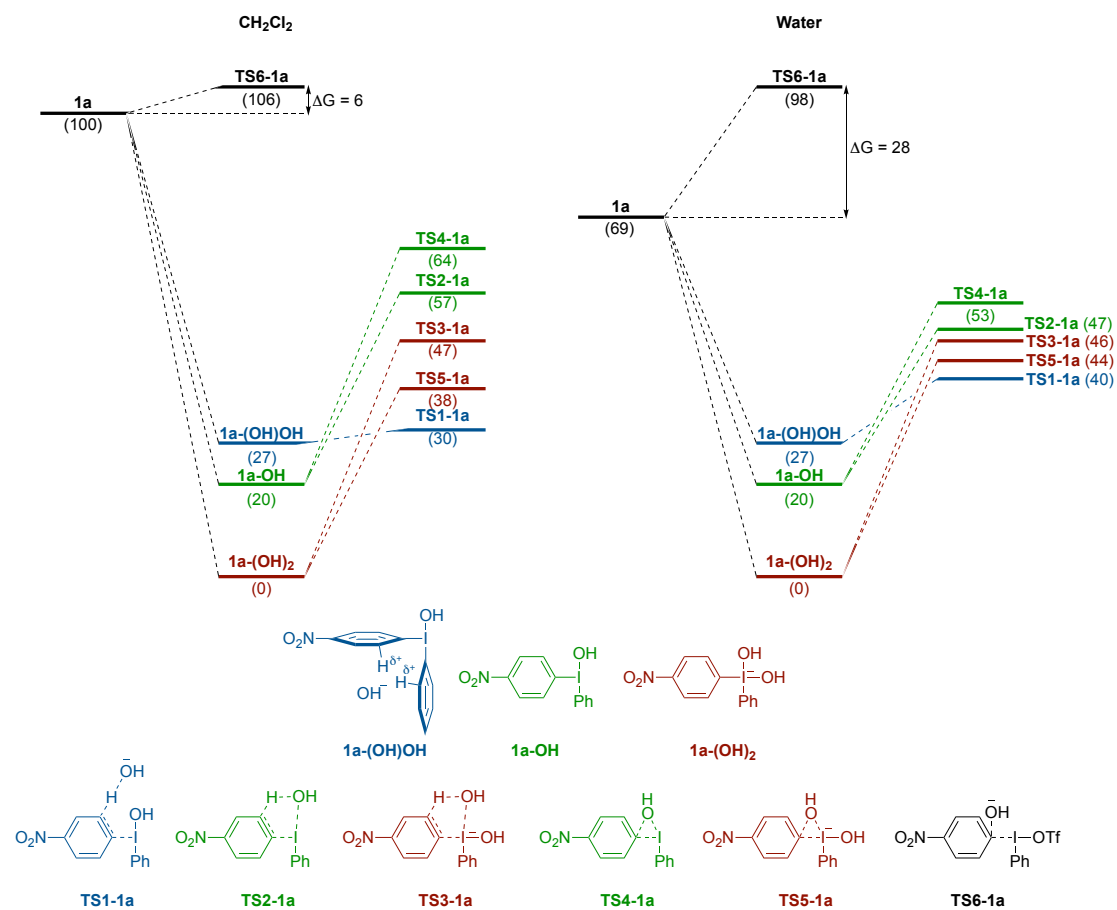

Figure S3 Free energy surface of the reaction between **1a** and hydroxide in CH<sub>2</sub>Cl<sub>2</sub> (left) and water (right) using B3LYP-D3

## 7.7. Dianisyliodonium Triflate (**1c**) and Hydroxide in CH<sub>2</sub>Cl<sub>2</sub> and Water (B3LYP-D3)

In order to verify that we also have the correct selectivity in the system employing **1c** we modeled it with together with hydroxide and the free energy surface is depicted in Figure S4. All possible aryne pathways (via **TS1-1c**, **TS2-1c** or **TS3-1c**) are lower than the corresponding ligand coupling pathways (via **TS4-1c** and **TS5-1c**), with the external elimination via **TS1-1c** being the major pathway in CH<sub>2</sub>Cl while competing with the 3-coordinated internal elimination via **TS2-1c** ( $\Delta\Delta G = 2$  kJ/mol) in water. The direct attack by the hydroxide on **1c** was not obtained despite numerous tries using constrained and unconstrained geometries. The imaginary frequency corresponding to the *O-C* coupling could be found, however, other imaginary frequencies corresponding to *O-I* interaction were also detected. The same behavior was seen for salt **1d**.

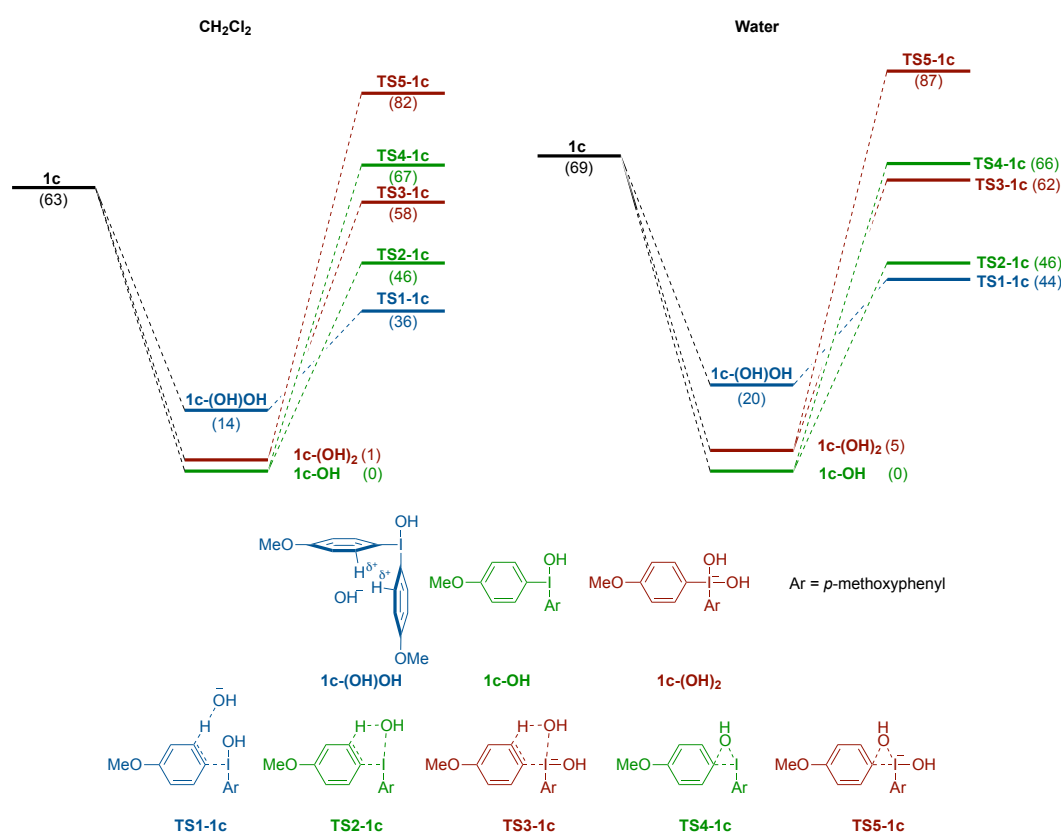

## 8. Arylation vs. Oxidation of Secondary Alcohol

In the reaction between activated alcohol **3b** and diphenyliodonium triflate (**1d**), the unexpected oxidation product **9** was obtained as the major product (Scheme S4a). Severe oxidation also occurred when using dimesityliodonium triflate (**1e**) indicating that the oxidation does not form via an aryne type of intermediate (Scheme S4b). We set out to elucidate the mechanism between these competing pathways (ligand coupling vs. oxidation) using DFT calculations (both M06-2X and B3LYP-D3). 1-Phenylethanol was chosen as the alcohol to simplify the calculations.

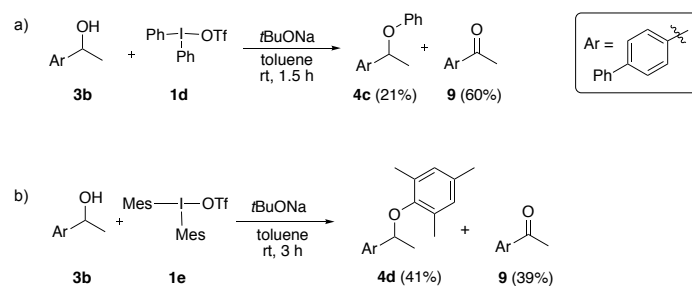

Scheme S4. Competing ligand coupling and oxidation pathways between **3b** and iodonium salts **1d** (a) and **1e** (b).

## 8.1. Diphenyliodonium Triflate (**1d**) and 1-Phenylethoxide in Toluene (B3LYP-D3 and M06-2X)

Both methods were unable to predict the product distribution seen in Scheme S4a. The 4-coordinated ligand coupling going via **TS7-1d** is at least 14 kJ/mol (B3LYP-D3) lower than any of the other TSs (**TS8-1d** to **TS11-1d**), suggesting a clear preference for ligand coupling over oxidation as seen in Figure S5.

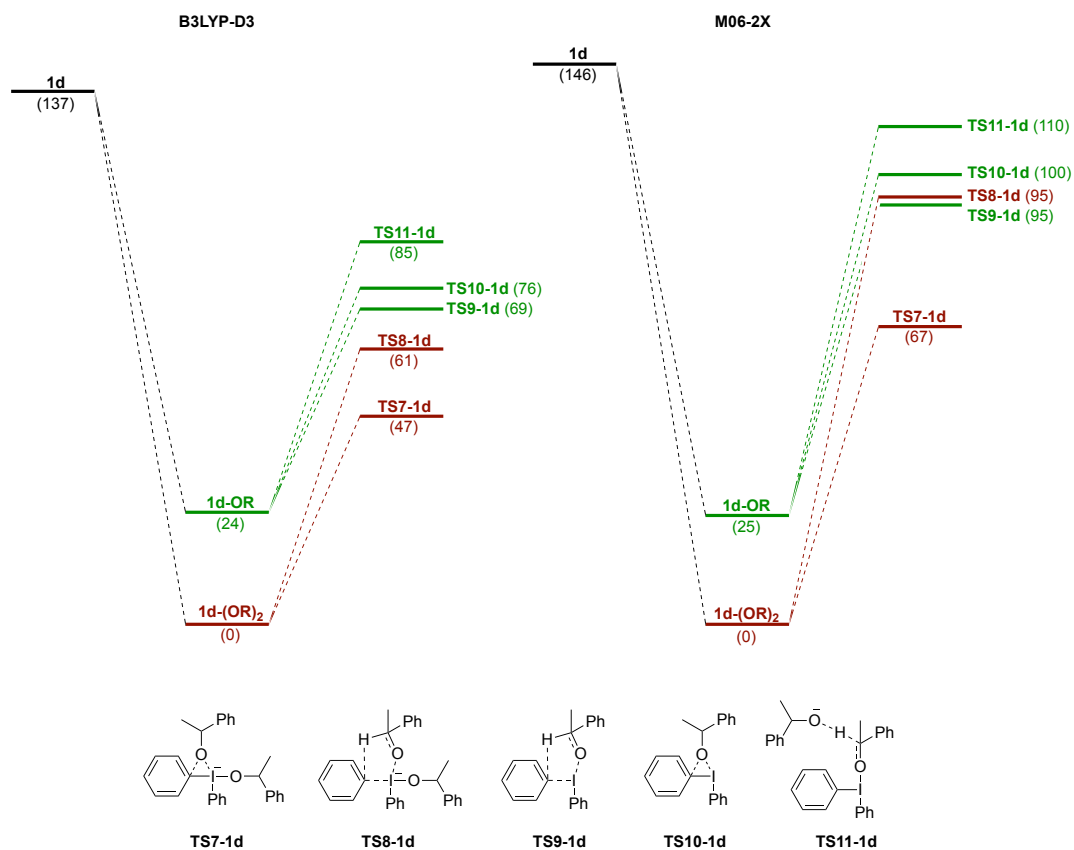

Figure S5. Free energy surface for the reaction between **1d** and 1-phenylethoxide using B3LYP-D3 (left) and M06-2X (right). Free alkoxides and triflates are omitted for clarity.

## 8.2. Dimesityliodonium Triflate (**1e**) and 1-Phenylethoxide in Toluene (B3LYP-D3 and M06-2X)

A similar discrepancy was seen for the calculation between **1e** and 1-phenylethoxide where the 4-coordinated ligand coupling going via **TS7-1e** is much lower in energy than any of the other TSs (**TS8-1e**–**TS11-1e**), again showing a clear preference for ligand coupling (Scheme S6).

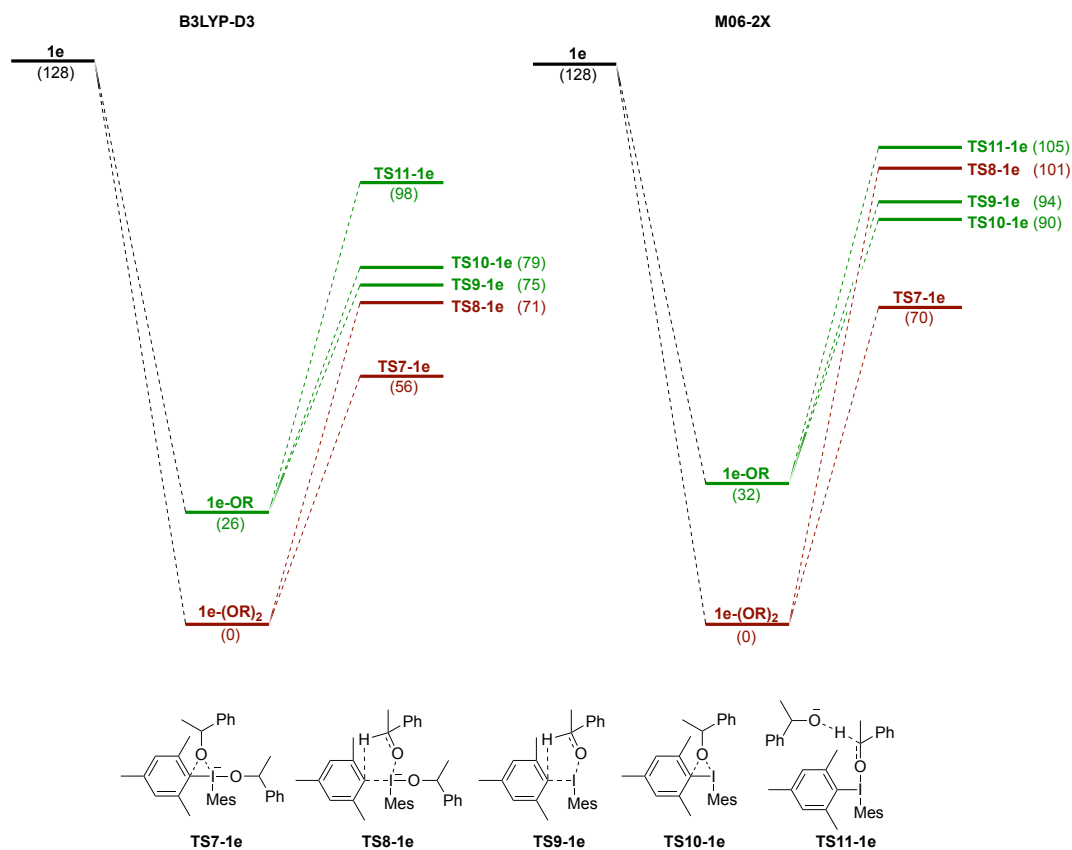

Figure S6. Free energy surface for the reaction between **1e** and 1-phenylethoxide using B3LYP-D3 (left) and M06-2X (right). Free alkoxides and triflates are omitted for clarity.

## 9. Selected Optimized Intermediates and Transition States

Optimized structures of the intermediates and transition states for iodonium salt **1a** are presented in Figure S7. The calculations are done using the B3LYP-D3 level of theory using dichloromethane as the solvent.

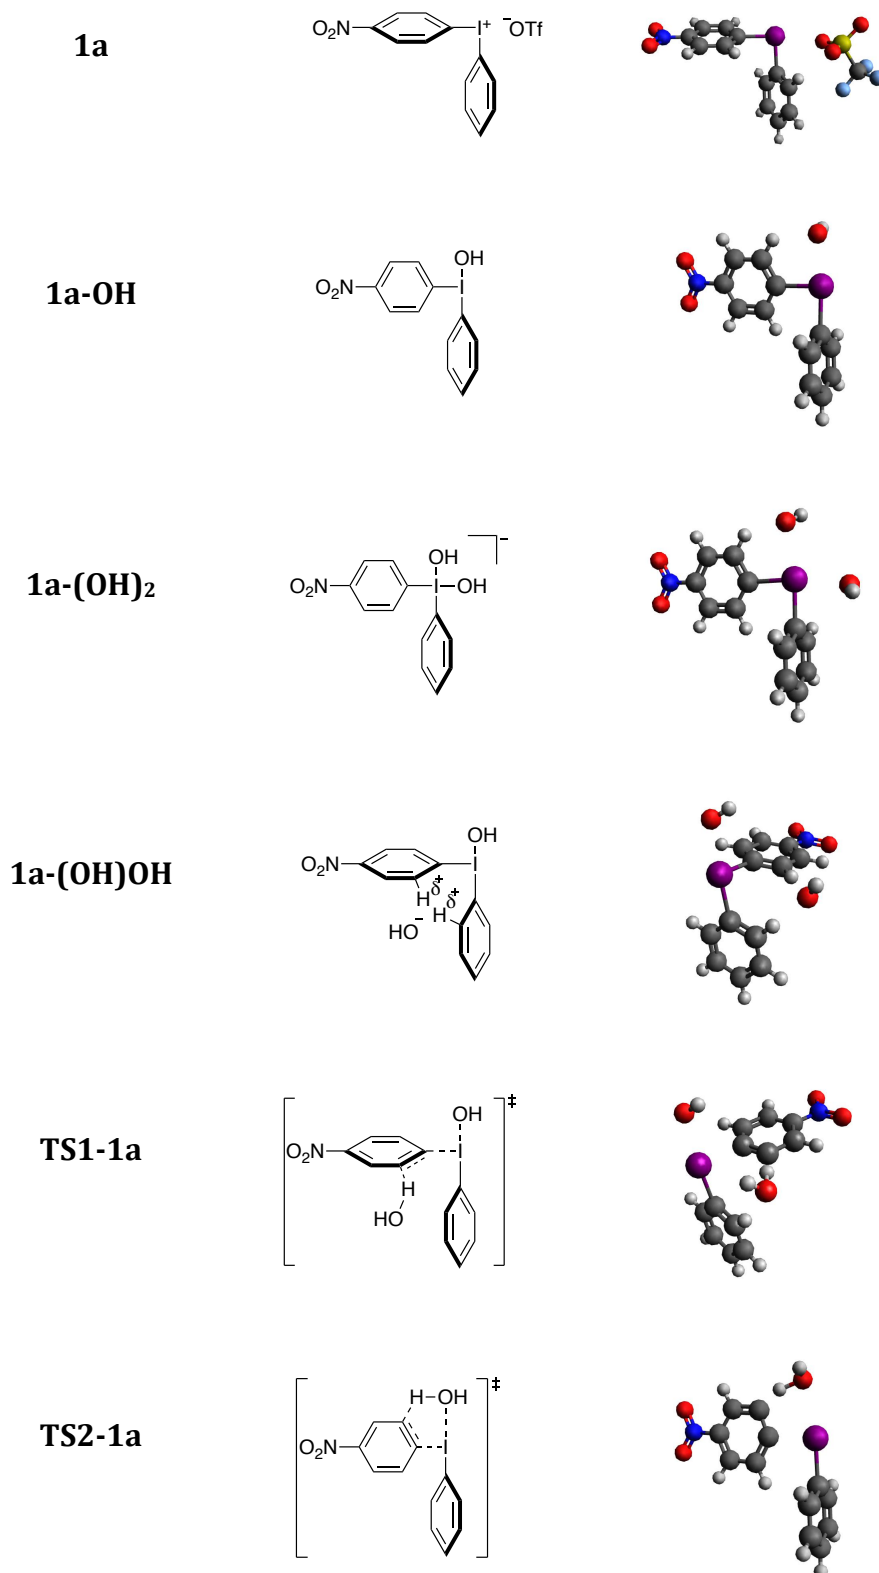

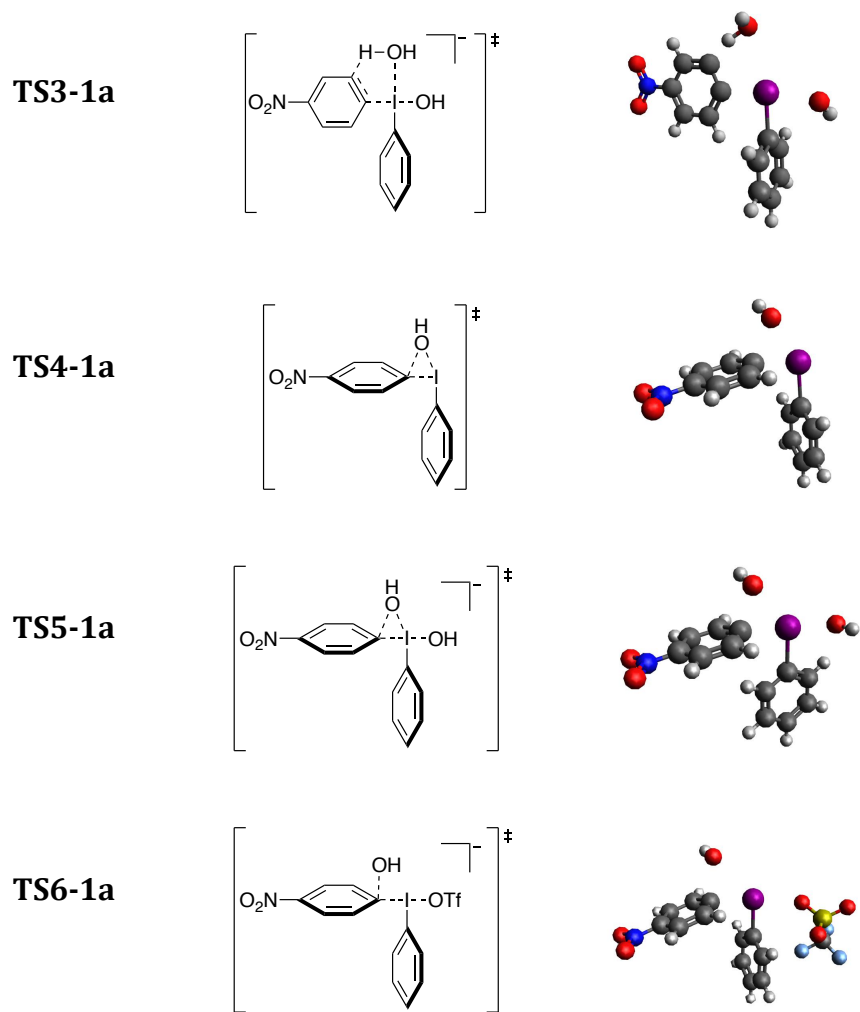

Figure S7. Structures of intermediates and transition state for the reaction between iodonium salt **1a** and hydroxide.



## 10. Cartesian Coordinates, Energies and Selected Vibrational Frequencies

Energies are given in Hartree and frequencies in  $\text{cm}^{-1}$

|                                             |   |                                      |
|---------------------------------------------|---|--------------------------------------|
| Sum of electronic and zero-point energies   | = | $\epsilon_0 + \epsilon_{\text{ZPE}}$ |
| Sum of electronic and thermal energies      | = | $\epsilon_0 + E_{\text{tot}}$        |
| Sum of electronic and thermal enthalpies    | = | $\epsilon_0 + H_{\text{corr}}$       |
| Sum of electronic and thermal free energies | = | $\epsilon_0 + G_{\text{corr}}$       |

---

**1a (B3LYP-D3, CH<sub>2</sub>Cl<sub>2</sub>)**

$E_0 + E_{ZPE}$  = 1640.781740  
 $E_0 + E_{tot}$  = 1640.758385  
 $E_0 + H_{corr}$  = 1640.757441  
 $E_0 + G_{corr}$  = 1640.841263

Coordinates:

|   |               |               |               |
|---|---------------|---------------|---------------|
| H | 2.8147440000  | -1.2728790000 | -2.1170290000 |
| H | 0.9526070000  | 1.5808210000  | -2.0288910000 |
| H | 0.4968140000  | 4.0083150000  | -1.8769830000 |
| H | 5.2522860000  | -0.8936160000 | -1.8158630000 |
| C | 0.3446870000  | 1.9735470000  | -1.2252890000 |
| F | -5.2656020000 | 0.0473680000  | -1.2238320000 |
| C | 3.1954310000  | -0.9156010000 | -1.1700440000 |
| C | 0.0834640000  | 3.3407840000  | -1.1308110000 |
| C | 4.5615880000  | -0.7026880000 | -1.0071340000 |
| O | -2.5050620000 | -1.0664210000 | -0.7122640000 |
| O | 7.2078900000  | -0.2389220000 | -0.5643850000 |
| I | 0.2266000000  | -0.9735360000 | -0.3510070000 |
| C | -0.2032630000 | 1.1599340000  | -0.2464910000 |
| C | 2.3513090000  | -0.6504620000 | -0.0983290000 |
| C | -0.7064340000 | 3.8379170000  | -0.0947810000 |
| H | -0.9067810000 | 4.9007100000  | -0.0347110000 |
| F | -4.0588980000 | 1.4029000000  | -0.0264550000 |
| C | -4.7027760000 | 0.2253210000  | -0.0192500000 |
| C | 5.0220800000  | -0.2319750000 | 0.2167010000  |
| O | -4.3566200000 | -2.3871490000 | 0.3099600000  |
| S | -3.5151190000 | -1.1844170000 | 0.3800010000  |
| N | 6.4749340000  | -0.0000340000 | 0.3871860000  |
| C | -0.9957200000 | 1.6039930000  | 0.7965360000  |
| C | -1.2442490000 | 2.9768000000  | 0.8586910000  |
| F | -5.6812710000 | 0.2885640000  | 0.8968740000  |
| C | 2.8105260000  | -0.1875830000 | 1.1298420000  |
| C | 4.1743730000  | 0.0311360000  | 1.2881690000  |
| O | 6.8636620000  | 0.4186800000  | 1.4703740000  |
| H | -1.4300600000 | 0.9233340000  | 1.5154340000  |
| H | -1.8661450000 | 3.3602260000  | 1.6582660000  |
| O | -2.9856150000 | -0.8359000000 | 1.7128040000  |
| H | 2.1334500000  | 0.0088250000  | 1.9498800000  |
| H | 4.5724410000  | 0.3940600000  | 2.2249000000  |

**1a (B3LYP-D3, H<sub>2</sub>O)**

$E_0 + E_{ZPE}$  = -1640.788699  
 $E_0 + E_{tot}$  = -1640.765253  
 $E_0 + H_{corr}$  = -1640.764308  
 $E_0 + G_{corr}$  = -1640.848479

Coordinates:

|   |               |               |               |
|---|---------------|---------------|---------------|
| H | 2.6874160000  | -0.4477470000 | -2.2804820000 |
| H | -0.1430730000 | 1.4261310000  | -2.2310500000 |
| H | 5.1059250000  | 0.0566230000  | -2.0143660000 |
| H | -0.8286720000 | 3.7863960000  | -1.9287400000 |
| C | 3.1300240000  | -0.4113980000 | -1.2949020000 |
| F | -5.0905840000 | 0.1446390000  | -1.2820770000 |
| C | -0.3952060000 | 1.8015710000  | -1.2491990000 |
| C | 4.4844230000  | -0.1280780000 | -1.1501230000 |
| C | -0.7833160000 | 3.1295120000  | -1.0687240000 |
| O | 7.1145300000  | 0.4404450000  | -0.7307890000 |
| O | -2.5032360000 | -1.3175710000 | -0.7044740000 |
| I | 0.2664340000  | -1.0676880000 | -0.3725820000 |
| F | -3.6629090000 | 1.4168050000  | -0.2497340000 |
| C | 2.3761950000  | -0.6377550000 | -0.1493850000 |
| C | -0.3510920000 | 0.9986350000  | -0.1206190000 |
| C | -4.4665050000 | 0.3544460000  | -0.1112430000 |
| C | 5.0243590000  | -0.0872170000 | 0.1307480000  |

|   |               |               |              |
|---|---------------|---------------|--------------|
| C | -1.1090800000 | 3.6024420000  | 0.2013680000 |
| N | 6.4655060000  | 0.2130000000  | 0.2831440000 |
| H | -1.4101190000 | 4.6351310000  | 0.3291340000 |
| S | -3.4889770000 | -1.1744830000 | 0.4034690000 |
| O | -4.5094940000 | -2.2356260000 | 0.4510670000 |
| F | -5.3975900000 | 0.6486580000  | 0.8116190000 |
| C | 2.9130690000  | -0.6029630000 | 1.1323500000 |
| C | -0.6747570000 | 1.4217180000  | 1.1576800000 |
| C | 4.2675750000  | -0.3196490000 | 1.2742650000 |
| C | -1.0562850000 | 2.7555360000  | 1.3064490000 |
| O | 6.9339960000  | 0.2187120000  | 1.4151640000 |
| O | -2.8880540000 | -0.7966130000 | 1.6952770000 |
| H | -0.6568090000 | 0.7503860000  | 2.0030940000 |
| H | 2.3041240000  | -0.7847160000 | 2.0070100000 |
| H | 4.7246280000  | -0.2812270000 | 2.2524880000 |
| H | -1.3179600000 | 3.1207480000  | 2.2920030000 |

**1c (B3LYP-D3, CH<sub>2</sub>Cl<sub>2</sub>)**

$E_0 + E_{ZPE}$  = -1665.282537  
 $E_0 + E_{tot}$  = -1665.256424  
 $E_0 + H_{corr}$  = -1665.255480  
 $E_0 + G_{corr}$  = -1665.345042

Coordinates:

|   |               |               |               |
|---|---------------|---------------|---------------|
| H | 3.1094880000  | -0.4439340000 | -2.1299760000 |
| H | 0.1391110000  | 1.2085490000  | -2.1232180000 |
| H | -0.7558590000 | 3.4641840000  | -1.7822970000 |
| H | 5.4490040000  | 0.1805180000  | -1.7704700000 |
| F | -4.8033380000 | -0.5542440000 | -1.3335470000 |
| H | -2.4529900000 | 4.9952430000  | -1.2071610000 |
| C | -0.1938590000 | 1.5074680000  | -1.1385050000 |
| C | 3.5113440000  | -0.4469520000 | -1.1252760000 |
| H | 7.6665450000  | -0.1968310000 | -1.0801890000 |
| C | -0.7037390000 | 2.7896630000  | -0.9398230000 |
| C | 4.8425860000  | -0.0895170000 | -0.9178450000 |
| H | 7.1803400000  | 1.5157240000  | -0.8810960000 |
| H | -0.8128930000 | 5.6179210000  | -0.8449540000 |
| O | -2.0931740000 | -1.8248720000 | -0.8196700000 |
| C | -1.7876090000 | 5.3612650000  | -0.4201520000 |
| C | 7.5378760000  | 0.6203470000  | -0.3649300000 |
| I | 0.6670880000  | -1.3315320000 | -0.3586300000 |
| F | -3.4540270000 | 0.7869450000  | -0.2842390000 |
| C | -4.1776230000 | -0.3357610000 | -0.1644300000 |
| C | -0.1341290000 | 0.6471280000  | -0.0560640000 |
| C | 2.7265450000  | -0.7947760000 | -0.0351820000 |
| H | -2.2244610000 | 6.2408660000  | 0.0468470000  |
| H | 8.4876660000  | 0.8335970000  | 0.1197400000  |
| S | -3.0847930000 | -1.8047650000 | 0.2909520000  |
| O | -4.0203270000 | -2.9410670000 | 0.2987420000  |
| C | -1.1399840000 | 3.1757690000  | 0.3336300000  |
| C | 5.3673580000  | -0.0865700000 | 0.3803790000  |
| O | -1.6530240000 | 4.3943210000  | 0.6281940000  |
| O | 6.6431810000  | 0.2438790000  | 0.6894310000  |
| F | -5.1138830000 | -0.1312490000 | 0.7770870000  |
| C | -0.5667570000 | 0.9961740000  | 1.2182320000  |
| C | 3.2314370000  | -0.8034250000 | 1.2647840000  |
| C | -1.0665640000 | 2.2742390000  | 1.4056150000  |
| C | 4.5540160000  | -0.4454130000 | 1.4665180000  |
| O | -2.5103020000 | -1.4294990000 | 1.5964790000  |
| H | -0.5473950000 | 0.2902450000  | 2.0352090000  |
| H | 2.6112050000  | -1.0794620000 | 2.1071810000  |
| H | -1.4222590000 | 2.5870220000  | 2.3791480000  |
| H | 4.9785200000  | -0.4392200000 | 2.4625520000  |

**1c (B3LYP-D3, H<sub>2</sub>O)**

$E_0 + E_{ZPE}$  = -1665.288846  
 $E_0 + E_{tot}$  = -1665.262647  
 $E_0 + H_{corr}$  = -1665.261703  
 $E_0 + G_{corr}$  = -1665.351898

Coordinates:

|   |               |               |               |
|---|---------------|---------------|---------------|
| H | 3.1215390000  | -0.4693560000 | -2.1291840000 |
| H | 0.1613390000  | 1.2072550000  | -2.1152230000 |
| H | -0.7370910000 | 3.4618120000  | -1.7789010000 |
| H | 5.4628260000  | 0.1539390000  | -1.7776990000 |
| F | -4.8170680000 | -0.5466300000 | -1.3526930000 |
| H | -2.4211020000 | 5.0064110000  | -1.2161080000 |
| C | -0.1806320000 | 1.5044290000  | -1.1330690000 |
| C | 3.5247580000  | -0.4628330000 | -1.1252850000 |
| H | 7.6790020000  | -0.2238420000 | -1.0854460000 |
| C | -0.6917220000 | 2.7865700000  | -0.9366530000 |
| C | 4.8567180000  | -0.1060360000 | -0.9218590000 |
| H | 7.1982500000  | 1.4921970000  | -0.9068820000 |
| H | -0.7810950000 | 5.6143400000  | -0.8306270000 |
| O | -2.1244320000 | -1.8449120000 | -0.8096960000 |
| C | -1.7630340000 | 5.3643280000  | -0.4195870000 |
| C | 7.5541760000  | 0.6024740000  | -0.3804340000 |
| I | 0.6820700000  | -1.3329890000 | -0.3490720000 |
| F | -3.4652290000 | 0.7913650000  | -0.3020420000 |
| C | -4.1974830000 | -0.3238590000 | -0.1808950000 |
| C | -0.1264640000 | 0.6431770000  | -0.0506050000 |
| C | 2.7417060000  | -0.7963760000 | -0.0297010000 |
| H | -2.1988760000 | 6.2451340000  | 0.0459720000  |
| H | 8.5050310000  | 0.8188160000  | 0.1007080000  |
| S | -3.1215710000 | -1.7998170000 | 0.2918340000  |
| O | -4.0740600000 | -2.9252390000 | 0.3036290000  |
| C | -1.1340480000 | 3.1723730000  | 0.3348490000  |
| C | 5.3817890000  | -0.0898150000 | 0.3761900000  |
| O | -1.6487480000 | 4.3910090000  | 0.6271190000  |
| O | 6.6588950000  | 0.2412230000  | 0.6803640000  |
| F | -5.1392360000 | -0.1079770000 | 0.7535090000  |
| C | -0.5623100000 | 0.9933680000  | 1.2225270000  |
| C | 3.2445490000  | -0.7915610000 | 1.2707390000  |
| C | -1.0641600000 | 2.2711490000  | 1.4076030000  |
| C | 4.5682080000  | -0.4338870000 | 1.4671000000  |
| O | -2.5580820000 | -1.4241890000 | 1.6020380000  |
| H | -0.5381460000 | 0.2905420000  | 2.0421220000  |
| H | 2.6232930000  | -1.0550470000 | 2.1162530000  |
| H | -1.4189070000 | 2.5852880000  | 2.3811580000  |
| H | 4.9922570000  | -0.4169220000 | 2.4632270000  |

**1d (B3LYP-D3, CH<sub>2</sub>Cl<sub>2</sub>)**

$E_0 + E_{ZPE}$  = -1436.219593  
 $E_0 + E_{tot}$  = -1436.198747  
 $E_0 + H_{corr}$  = -1436.197803  
 $E_0 + G_{corr}$  = -1436.275356

Coordinates:

|   |               |               |               |
|---|---------------|---------------|---------------|
| H | 3.6310440000  | -0.7966130000 | -2.0404760000 |
| H | 1.9187580000  | 1.7536600000  | -1.7249610000 |
| H | 6.0460290000  | -0.4810560000 | -1.6010310000 |
| H | 1.4271340000  | 4.1661480000  | -1.4804470000 |
| F | -4.5884590000 | 0.0644310000  | -1.3166540000 |
| C | 3.9866580000  | -0.6557960000 | -1.0283590000 |
| C | 1.2108250000  | 2.0938570000  | -0.9814940000 |
| C | 0.9291690000  | 3.4525630000  | -0.8352830000 |
| O | -1.7846130000 | -0.9679890000 | -0.8257550000 |
| C | 5.3469030000  | -0.4760330000 | -0.7736230000 |

|   |               |               |               |
|---|---------------|---------------|---------------|
| I | 1.0024210000  | -0.9067940000 | -0.3252190000 |
| C | 0.5520230000  | 1.2172450000  | -0.1345080000 |
| C | -4.0549000000 | 0.1695510000  | -0.0898000000 |
| F | -3.4655060000 | 1.3721850000  | 0.0087100000  |
| O | -3.5979900000 | -2.4429330000 | 0.0446270000  |
| C | 3.1143430000  | -0.6415920000 | 0.0531000000  |
| C | 0.0118640000  | 3.8829940000  | 0.1225610000  |
| H | -0.2037180000 | 4.9397600000  | 0.2236230000  |
| S | -2.8111350000 | -1.2135520000 | 0.2244940000  |
| C | 5.7990110000  | -0.2906090000 | 0.5310940000  |
| H | 6.8565160000  | -0.1509290000 | 0.7200690000  |
| F | -5.0528160000 | 0.1193570000  | 0.8068350000  |
| C | -0.3653730000 | 1.5964190000  | 0.8289800000  |
| C | -0.6319490000 | 2.9622990000  | 0.9459970000  |
| C | 3.5357570000  | -0.4679740000 | 1.3660160000  |
| H | -0.8744340000 | 0.8720550000  | 1.4499150000  |
| O | -2.3326420000 | -0.9457670000 | 1.5959330000  |
| C | 4.8985810000  | -0.2860740000 | 1.5959540000  |
| H | -1.3498130000 | 3.2941550000  | 1.6861490000  |
| H | 2.8334810000  | -0.4671310000 | 2.1889070000  |
| H | 5.2503700000  | -0.1444850000 | 2.6106880000  |

**1d (B3LYP-D3, H<sub>2</sub>O)**

$E_0 + E_{ZPE}$  = -1436.224956  
 $E_0 + E_{tot}$  = -1436.204132  
 $E_0 + H_{corr}$  = -1436.203188  
 $E_0 + G_{corr}$  = -1436.280356

Coordinates:

|   |               |               |               |
|---|---------------|---------------|---------------|
| H | 3.6424350000  | -0.6210140000 | -2.0567720000 |
| H | 1.5354690000  | 1.7232400000  | -1.9398360000 |
| H | 0.9514010000  | 4.1135300000  | -1.6702730000 |
| H | 6.0444170000  | -0.2229380000 | -1.6145570000 |
| F | -4.5486630000 | 0.1068080000  | -1.2960480000 |
| C | 0.9438910000  | 2.0493080000  | -1.0954690000 |
| C | 3.9992860000  | -0.5159320000 | -1.0410720000 |
| C | 0.6108520000  | 3.3948040000  | -0.9349320000 |
| O | -1.7913930000 | -1.0716610000 | -0.8471080000 |
| C | 5.3522240000  | -0.2903470000 | -0.7841150000 |
| I | 1.0335490000  | -0.9294340000 | -0.3370700000 |
| C | 0.4892730000  | 1.1650270000  | -0.1295550000 |
| C | -3.9787570000 | 0.2045830000  | -0.0840070000 |
| F | -3.3222860000 | 1.3722920000  | -0.0229080000 |
| C | 3.1371280000  | -0.5940030000 | 0.0452680000  |
| O | -3.6742700000 | -2.4253660000 | 0.0669890000  |
| C | -0.1552820000 | 3.8058550000  | 0.1553100000  |
| S | -2.8090670000 | -1.2429300000 | 0.2230640000  |
| H | -0.4106950000 | 4.8524740000  | 0.2684460000  |
| C | 5.8057250000  | -0.1520330000 | 0.5261930000  |
| H | 6.8576510000  | 0.0234330000  | 0.7163060000  |
| F | -4.9562590000 | 0.2243830000  | 0.8370480000  |
| C | -0.2767120000 | 1.5268210000  | 0.9654350000  |
| C | -0.5981670000 | 2.8790720000  | 1.0964900000  |
| C | 3.5579870000  | -0.4679540000 | 1.3633900000  |
| O | -2.2978890000 | -0.9986440000 | 1.5861590000  |
| C | 4.9140280000  | -0.2398560000 | 1.5946960000  |
| H | -0.6378330000 | 0.7954090000  | 1.6743560000  |
| H | -1.2004920000 | 3.1966030000  | 1.9389180000  |
| H | 2.8623650000  | -0.5376090000 | 2.1887000000  |
| H | 5.2667060000  | -0.1342970000 | 2.6134570000  |

**1d (B3LYP-D3, Toluene)**

$E_0 + E_{ZPE}$  = -1436.206741  
 $E_0 + E_{tot}$  = -1436.185969

$E_0 + H_{\text{corr}} = -1436.185025$   
 $E_0 + G_{\text{corr}} = -1436.262517$   
**Coordinates:**  
H 3.532240000 -1.027342000 -2.036458000  
H 5.968062000 -0.754023000 -1.694009000  
H 2.158592000 1.708739000 -1.507371000  
F -4.514970000 -0.041458000 -1.428569000  
H 1.745212000 4.143270000 -1.326875000  
C 3.921734000 -0.808098000 -1.050594000  
C 1.377167000 2.084483000 -0.860699000  
C 5.294041000 -0.651728000 -0.851980000  
C 1.140152000 3.454745000 -0.749283000  
O -1.724905000 -0.931528000 -0.737551000  
I 0.949704000 -0.906884000 -0.255634000  
C -4.069584000 0.137022000 -0.177234000  
C 0.578992000 1.242827000 -0.103950000  
F -3.531983000 1.368585000 -0.096333000  
C 3.077308000 -0.670388000 0.045296000  
C 0.130013000 3.928755000 0.086495000  
O -3.504693000 -2.445378000 0.141478000  
H -0.051240000 4.994338000 0.159882000  
S -2.792690000 -1.173153000 0.282748000  
C 5.790435000 -0.365134000 0.417458000  
H 6.856949000 -0.244068000 0.564678000  
F -5.119496000 0.087737000 0.655155000  
C -0.430917000 1.663125000 0.740483000  
C -0.649331000 3.040411000 0.822989000  
H -1.039278000 0.966109000 1.301479000  
C 3.548723000 -0.393788000 1.323796000  
H -1.438339000 3.404584000 1.469636000  
C 4.921901000 -0.235875000 1.500785000  
O -2.376534000 -0.790286000 1.647234000  
H 2.871462000 -0.294866000 2.162038000  
H 5.308354000 -0.015803000 2.488713000

**1d (M06-2X, Toluene)**

$E_0 + E_{\text{ZPE}} = -1435.707736$   
 $E_0 + E_{\text{tot}} = -1435.687463$   
 $E_0 + H_{\text{corr}} = -1435.686519$   
 $E_0 + G_{\text{corr}} = -1435.761618$   
**Coordinates:**  
H 3.497713000 -1.184649000 -1.983696000  
H 5.930826000 -0.889314000 -1.646207000  
H 2.166951000 1.654215000 -1.502831000  
F -4.394711000 0.051865000 -1.418586000  
H 1.750993000 4.089213000 -1.361141000  
C 3.881907000 -0.887410000 -1.015678000  
C 1.377242000 2.040414000 -0.870676000  
C 5.250484000 -0.718771000 -0.821195000  
C 1.138258000 3.408472000 -0.783411000  
O -1.682163000 -0.870138000 -0.713842000  
I 0.931607000 -0.910964000 -0.235217000  
C -4.004744000 0.145602000 -0.151718000  
C 0.567918000 1.207288000 -0.119177000  
C 0.115602000 3.892094000 0.026617000  
F -3.478266000 1.358446000 0.035456000  
O -3.463174000 -2.414163000 0.040149000  
C 3.030785000 -0.662646000 0.057128000  
H -0.067493000 4.957955000 0.081468000  
S -2.762212000 -1.162323000 0.259921000  
C 5.736909000 -0.331689000 0.421762000  
H 6.802136000 -0.199657000 0.566100000

F -5.075712000 0.034486000 0.628273000  
C -0.453784000 1.641073000 0.702148000  
C -0.674169000 3.016005000 0.761263000  
H -1.066819000 0.950100000 1.269275000  
C 3.494572000 -0.284250000 1.309786000  
H -1.472142000 3.390046000 1.390538000  
C 4.863345000 -0.113826000 1.483186000  
O -2.377449000 -0.850055000 1.636756000  
H 2.808954000 -0.118320000 2.131581000  
H 5.243632000 0.186227000 2.451667000

**1e (B3LYP-D3, Toluene)**

$E_0 + E_{\text{ZPE}} = -1672.033524$   
 $E_0 + E_{\text{tot}} = -1672.003296$   
 $E_0 + H_{\text{corr}} = -1672.002352$   
 $E_0 + G_{\text{corr}} = -1672.098179$   
**Coordinates:**  
H 1.027295000 2.651857000 -3.019986000  
H -0.208851000 1.393522000 -2.957870000  
H -2.476401000 0.690648000 -2.726591000  
H 1.464156000 1.008298000 -2.525485000  
C 0.689400000 1.775768000 -2.467162000  
H -3.830928000 1.740948000 -2.308927000  
C -2.993894000 1.178117000 -1.896372000  
H -2.299338000 1.889376000 -1.443794000  
H 1.120680000 4.138695000 -1.281982000  
O 2.244383000 -0.661877000 -1.036469000  
C 0.434565000 2.133732000 -1.027800000  
F 5.085047000 -1.635945000 -0.992980000  
H -5.495601000 0.872301000 -0.992162000  
C -3.479341000 0.168951000 -0.889111000  
I -0.513870000 -0.793753000 -0.722629000  
C 0.733314000 3.420229000 -0.567869000  
C -4.831257000 0.148571000 -0.531856000  
C -2.650232000 -0.770622000 -0.266314000  
C -0.050958000 1.250719000 -0.061456000  
O 3.829273000 0.926781000 0.047733000  
H -7.349755000 -1.483408000 0.072904000  
C 4.373422000 -1.674045000 0.144517000  
S 3.063266000 -0.318740000 0.167885000  
F 3.803085000 -2.888831000 0.237601000  
C -5.346460000 -0.766378000 0.385057000  
H 0.791339000 5.919923000 0.438167000  
H -1.795412000 -3.441781000 0.565859000  
H -7.267614000 0.202750000 0.586231000  
C -3.111130000 -1.723757000 0.652730000  
C -6.816001000 -0.781728000 0.722390000  
C 0.572349000 3.795457000 0.765084000  
C -4.474719000 -1.692273000 0.958117000  
F 5.222887000 -1.534026000 1.174005000  
C 0.954731000 5.179612000 1.224169000  
C -0.213092000 1.538829000 1.293043000  
C -2.230871000 -2.762542000 1.304176000  
O 2.350425000 -0.539381000 1.439672000  
H 2.016638000 5.207585000 1.488429000  
H -4.860127000 -2.415688000 1.668831000  
C 0.100960000 2.848008000 1.671892000  
H -6.983596000 -1.097807000 1.754128000  
H -1.405051000 -2.308437000 1.856613000  
H -2.809496000 -3.365783000 2.003616000  
H 0.385854000 5.480287000 2.106230000  
H -1.662851000 0.177543000 2.139848000

|   |               |               |              |
|---|---------------|---------------|--------------|
| C | -0.6490420000 | 0.5392020000  | 2.3279800000 |
| H | 0.0406470000  | -0.3081740000 | 2.3297470000 |
| H | -0.0086510000 | 3.1161640000  | 2.7170490000 |
| H | -0.6323700000 | 0.9898810000  | 3.3198950000 |

**1e (M06-2X, Toluene)**

|                  |   |              |
|------------------|---|--------------|
| $E_0 + E_{ZPE}$  | = | -1671.393691 |
| $E_0 + E_{tot}$  | = | -1671.363975 |
| $E_0 + H_{corr}$ | = | -1671.363031 |
| $E_0 + G_{corr}$ | = | -1671.456308 |

Coordinates:

|   |               |               |               |
|---|---------------|---------------|---------------|
| H | 1.0469600000  | 2.6117970000  | -3.0185170000 |
| H | -0.2061730000 | 1.3694640000  | -2.9510210000 |
| H | -2.4390910000 | 0.6921580000  | -2.7344270000 |
| H | 1.4699720000  | 0.9563130000  | -2.5455750000 |
| C | 0.7058440000  | 1.7336930000  | -2.4725240000 |
| H | -3.7715010000 | 1.7707930000  | -2.3145760000 |
| C | -2.9370090000 | 1.2027400000  | -1.9063540000 |
| H | -2.2273620000 | 1.9087570000  | -1.4680160000 |
| H | 1.2027830000  | 4.0770050000  | -1.2727950000 |
| O | 2.2203920000  | -0.6810980000 | -1.0694180000 |
| C | 0.4751740000  | 2.0869300000  | -1.0296550000 |
| H | -5.4367820000 | 0.9481790000  | -0.9789660000 |
| F | 5.0817240000  | -1.4558920000 | -0.9365390000 |
| C | -3.4313700000 | 0.2139830000  | -0.8861080000 |
| I | -0.5153690000 | -0.7917950000 | -0.7346660000 |
| C | 0.8030310000  | 3.3598490000  | -0.5635050000 |
| C | -4.7798550000 | 0.2156810000  | -0.5217390000 |
| C | -2.6146810000 | -0.7336360000 | -0.2704640000 |
| C | -0.0233400000 | 1.2056020000  | -0.0711550000 |
| F | 3.8317000000  | -2.8552550000 | 0.1285500000  |
| C | 4.3234350000  | -1.6162620000 | 0.1452530000  |
| S | 2.9543560000  | -0.3729690000 | 0.1806700000  |
| O | 3.6349080000  | 0.9121360000  | 0.1855140000  |
| H | -7.2827960000 | 0.1467200000  | 0.2801050000  |
| C | -5.3001580000 | -0.6903450000 | 0.3949530000  |
| H | 0.9199810000  | 5.8403850000  | 0.4604980000  |
| H | -7.2391790000 | -1.6106130000 | 0.4743210000  |
| H | -1.8020120000 | -3.4181660000 | 0.5386150000  |
| C | -3.0858220000 | -1.6821470000 | 0.6460600000  |
| C | -6.7583190000 | -0.6746650000 | 0.7678390000  |
| C | 0.6557390000  | 3.7249050000  | 0.7714320000  |
| C | -4.4418250000 | -1.6327140000 | 0.9588100000  |
| F | 5.0973760000  | -1.4904820000 | 1.2203930000  |
| C | 1.0700740000  | 5.0933620000  | 1.2407930000  |
| C | -0.1804920000 | 1.4899740000  | 1.2825790000  |
| C | -2.2136580000 | -2.7327570000 | 1.2836300000  |
| O | 2.2012380000  | -0.7221140000 | 1.3855660000  |
| H | 2.1316860000  | 5.0904770000  | 1.5014960000  |
| H | -4.8365910000 | -2.3541460000 | 1.6673610000  |
| C | 0.1651760000  | 2.7845770000  | 1.6714270000  |
| H | -1.3741310000 | -2.2888410000 | 1.8234710000  |
| H | -6.8785600000 | -0.5673740000 | 1.8479710000  |
| H | -2.7965370000 | -3.3227390000 | 1.9893210000  |
| H | -1.6780780000 | 0.1799800000  | 2.1202220000  |
| H | 0.5081090000  | 5.3938050000  | 2.1256910000  |
| H | 0.0099840000  | -0.3798890000 | 2.2836480000  |
| C | -0.6469090000 | 0.4931520000  | 2.3044520000  |
| H | 0.0628420000  | 3.0485020000  | 2.7186740000  |
| H | -0.5983550000 | 0.9318180000  | 3.2997920000  |

**TfO<sup>-</sup> (B3LYP-D3, CH<sub>2</sub>Cl<sub>2</sub>)**

|                 |   |             |
|-----------------|---|-------------|
| $E_0 + E_{ZPE}$ | = | -961.784737 |
|-----------------|---|-------------|

|                  |   |             |
|------------------|---|-------------|
| $E_0 + E_{tot}$  | = | -961.777512 |
| $E_0 + H_{corr}$ | = | -961.776568 |
| $E_0 + G_{corr}$ | = | -961.817180 |

Coordinates:

|   |               |               |               |
|---|---------------|---------------|---------------|
| O | -1.2568480000 | 0.3701510000  | -1.3908820000 |
| F | 1.4497760000  | -0.8896880000 | -0.8856580000 |
| F | 1.4496650000  | 1.2120300000  | -0.3278060000 |
| C | 0.9648720000  | 0.0000740000  | -0.0001540000 |
| S | -0.9239170000 | -0.0000470000 | 0.0000640000  |
| O | -1.2557470000 | -1.3899810000 | 0.3749800000  |
| O | -1.2560260000 | 1.0195970000  | 1.0162570000  |
| F | 1.4497170000  | -0.3221020000 | 1.2131370000  |

**TfO<sup>-</sup> (B3LYP-D3, H<sub>2</sub>O)**

|                  |   |             |
|------------------|---|-------------|
| $E_0 + E_{ZPE}$  | = | -961.793784 |
| $E_0 + E_{tot}$  | = | -961.786530 |
| $E_0 + H_{corr}$ | = | -961.785586 |
| $E_0 + G_{corr}$ | = | -961.826335 |

Coordinates:

|   |               |               |               |
|---|---------------|---------------|---------------|
| F | 1.4476980000  | 0.3197380000  | -1.2140660000 |
| O | -1.2563540000 | -1.0223980000 | -1.0129510000 |
| O | -1.2563320000 | 1.3884450000  | -0.3789820000 |
| S | -0.9209500000 | 0.0000020000  | 0.0000080000  |
| C | 0.9666380000  | -0.0000680000 | 0.0001050000  |
| F | 1.4478560000  | -1.2114830000 | 0.3302180000  |
| F | 1.4478320000  | 0.8917580000  | 0.8838870000  |
| O | -1.2567010000 | -0.3660140000 | 1.3917950000  |

**TfO<sup>-</sup> (B3LYP-D3, Toluene)**

|                  |   |             |
|------------------|---|-------------|
| $E_0 + E_{ZPE}$  | = | -961.757411 |
| $E_0 + E_{tot}$  | = | -961.750213 |
| $E_0 + H_{corr}$ | = | -961.749269 |
| $E_0 + G_{corr}$ | = | -961.789779 |

Coordinates:

|   |               |               |               |
|---|---------------|---------------|---------------|
| F | 1.4548680000  | -0.3115290000 | -1.2152500000 |
| O | -1.2546450000 | 1.0315800000  | -1.0055410000 |
| O | -1.2559160000 | -1.3865110000 | -0.3905720000 |
| S | -0.9313300000 | -0.0001360000 | -0.0001940000 |
| C | 0.9608100000  | -0.0000820000 | 0.0002550000  |
| F | 1.4543110000  | 1.2087270000  | 0.3382460000  |
| F | 1.4543810000  | -0.8974110000 | 0.8777710000  |
| O | -1.2563920000 | 0.3555060000  | 1.3954470000  |

**TfO<sup>-</sup> (M06-2X, Toluene)**

|                  |   |             |
|------------------|---|-------------|
| $E_0 + E_{ZPE}$  | = | -961.530473 |
| $E_0 + E_{tot}$  | = | -961.523537 |
| $E_0 + H_{corr}$ | = | -961.522593 |
| $E_0 + G_{corr}$ | = | -961.562407 |

Coordinates:

|   |               |               |               |
|---|---------------|---------------|---------------|
| F | 1.4296880000  | 0.0708100000  | -1.2448200000 |
| O | -1.2367350000 | -1.0712110000 | -0.9586110000 |
| O | -1.2339130000 | 1.3669490000  | -0.4479210000 |
| C | 0.9426710000  | -0.0002300000 | -0.0000510000 |
| S | -0.9145480000 | 0.0000130000  | 0.0002390000  |
| F | 1.4310770000  | -1.1133860000 | 0.5603290000  |
| F | 1.4305590000  | 1.0418220000  | 0.6835590000  |
| O | -1.2349990000 | -0.2947440000 | 1.4071400000  |

**HO<sup>-</sup> (B3LYP-D3, CH<sub>2</sub>Cl<sub>2</sub>)**

|                  |   |            |
|------------------|---|------------|
| $E_0 + E_{ZPE}$  | = | -75.936860 |
| $E_0 + E_{tot}$  | = | -75.934499 |
| $E_0 + H_{corr}$ | = | -75.933555 |
| $E_0 + G_{corr}$ | = | -75.953110 |

Coordinates:

|   |             |             |              |
|---|-------------|-------------|--------------|
|   | 0.000000000 | 0.000000000 | -            |
| H | 0           | 0           | 0.8566970000 |
|   | 0.000000000 | 0.000000000 |              |
| O | 0           | 0           | 0.1070870000 |

**HO<sup>-</sup> (B3LYP-D3, H<sub>2</sub>O)**

|                  |   |            |
|------------------|---|------------|
| $E_0 + E_{ZPE}$  | = | -75.950621 |
| $E_0 + E_{tot}$  | = | -75.948260 |
| $E_0 + H_{corr}$ | = | -75.947316 |
| $E_0 + G_{corr}$ | = | -75.966871 |

Coordinates:

|   |             |             |              |
|---|-------------|-------------|--------------|
|   | 0.000000000 | 0.000000000 | -            |
| H | 0           | 0           | 0.8566010000 |
|   | 0.000000000 | 0.000000000 |              |
| O | 0           | 0           | 0.1070750000 |

**HO<sup>-</sup> (M06-2X, Toluene)**

|                  |   |            |
|------------------|---|------------|
| $E_0 + E_{ZPE}$  | = | -75.852788 |
| $E_0 + E_{tot}$  | = | -75.850427 |
| $E_0 + H_{corr}$ | = | -75.849483 |
| $E_0 + G_{corr}$ | = | -75.869034 |

Coordinates:

|   |             |             |              |
|---|-------------|-------------|--------------|
|   | 0.000000000 | 0.000000000 | -            |
| H | 0           | 0           | 0.8545720000 |
|   | 0.000000000 | 0.000000000 |              |
| O | 0           | 0           | 0.1068210000 |

**1-phenylethoxide (B3LYP-D3, Toluene)**

|                  |   |             |
|------------------|---|-------------|
| $E_0 + E_{ZPE}$  | = | -385.521650 |
| $E_0 + E_{tot}$  | = | -385.513858 |
| $E_0 + H_{corr}$ | = | -385.512913 |
| $E_0 + G_{corr}$ | = | -385.554042 |

Coordinates:

|   |               |               |               |
|---|---------------|---------------|---------------|
| H | -1.8928490000 | -0.7275710000 | -1.2709400000 |
| H | 0.1197260000  | -2.1206170000 | -0.6403190000 |
| O | -2.3114950000 | 1.1445460000  | -0.4840020000 |
| C | -1.7359560000 | -0.0673960000 | -0.3696900000 |
| C | 0.5976640000  | -1.1830100000 | -0.3658350000 |
| H | 2.5738060000  | -2.0392870000 | -0.3285020000 |
| C | -0.1936050000 | -0.0386820000 | -0.2038170000 |
| C | 1.9801170000  | -1.1394610000 | -0.1925870000 |
| C | 0.4449750000  | 1.1590350000  | 0.1240810000  |
| C | 2.6037420000  | 0.0622510000  | 0.1510440000  |
| H | -0.1837510000 | 2.0382080000  | 0.2150780000  |
| H | 3.6802090000  | 0.1018140000  | 0.2867300000  |
| C | 1.8276400000  | 1.2111130000  | 0.3072560000  |
| H | 2.3047880000  | 2.1525250000  | 0.5661730000  |
| H | -3.3944460000 | -0.9749550000 | 0.7033030000  |
| C | -2.3106900000 | -0.8924820000 | 0.8279530000  |
| H | -1.8853260000 | -1.9022870000 | 0.9091240000  |
| H | -2.1135260000 | -0.3524030000 | 1.7609380000  |

**1-phenylethoxide (M06-2X, Toluene)**

|                  |   |             |
|------------------|---|-------------|
| $E_0 + E_{ZPE}$  | = | -385.331538 |
| $E_0 + E_{tot}$  | = | -385.323845 |
| $E_0 + H_{corr}$ | = | -385.322901 |
| $E_0 + G_{corr}$ | = | -385.363773 |

Coordinates:

|   |               |               |               |
|---|---------------|---------------|---------------|
| H | -1.8919470000 | -0.7289410000 | -1.2679870000 |
| H | 0.1177600000  | -2.1200120000 | -0.6411360000 |
| O | -2.3009840000 | 1.1385410000  | -0.4779700000 |
| C | -1.7320450000 | -0.0721060000 | -0.3710230000 |
| C | 0.5947950000  | -1.1819830000 | -0.3662530000 |
| H | 2.5693480000  | -2.0328240000 | -0.3230350000 |
| C | -0.1961820000 | -0.0406620000 | -0.2087460000 |
| C | 1.9737530000  | -1.1351970000 | -0.1899010000 |
| C | 0.4357790000  | 1.1567630000  | 0.1188570000  |
| C | 2.5918930000  | 0.0662210000  | 0.1524040000  |

|   |               |               |              |
|---|---------------|---------------|--------------|
| H | -0.1964430000 | 2.0336260000  | 0.2051940000 |
| H | 3.6668270000  | 0.1080220000  | 0.2911030000 |
| C | 1.8153960000  | 1.2114330000  | 0.3047280000 |
| H | 2.2910040000  | 2.1527970000  | 0.5620850000 |
| H | -3.3738520000 | -0.9704370000 | 0.7195950000 |
| C | -2.2894400000 | -0.8894320000 | 0.8292930000 |
| H | -1.8618280000 | -1.8964970000 | 0.9070100000 |
| H | -2.0766870000 | -0.3442880000 | 1.7547770000 |

**1a-OH (B3LYP-D3, CH<sub>2</sub>Cl<sub>2</sub>)**

|                  |   |             |
|------------------|---|-------------|
| $E_0 + E_{ZPE}$  | = | -754.960597 |
| $E_0 + E_{tot}$  | = | -754.944333 |
| $E_0 + H_{corr}$ | = | -754.943389 |
| $E_0 + G_{corr}$ | = | -755.007521 |

Coordinates:

|   |               |               |               |
|---|---------------|---------------|---------------|
| H | -2.5760730000 | 0.6591140000  | -2.0927890000 |
| H | -3.7036180000 | 2.8606790000  | -2.0116490000 |
| C | -2.7073270000 | 1.1648290000  | -1.1431430000 |
| C | -3.3420580000 | 2.4069720000  | -1.0959980000 |
| H | 0.0028440000  | -3.7897620000 | -0.8913040000 |
| H | 2.2553770000  | 2.4388420000  | -0.4797920000 |
| H | -0.0291100000 | 1.4782630000  | -0.4795650000 |
| C | 0.8227250000  | 0.8437370000  | -0.2842590000 |
| C | 2.1035870000  | 1.3875000000  | -0.2815970000 |
| O | 4.6582790000  | 2.3369990000  | -0.2317430000 |
| C | 0.6864610000  | -0.5135980000 | -0.0335250000 |
| I | -1.3183320000 | -1.4261180000 | -0.0228300000 |
| C | 3.1874100000  | 0.5547650000  | -0.0209200000 |
| N | 4.5438800000  | 1.1351140000  | -0.0140280000 |
| O | -0.1717690000 | -3.5005910000 | 0.0133340000  |
| C | -2.2421910000 | 0.5895140000  | 0.0375390000  |
| C | -3.5073670000 | 3.0604790000  | 0.1243060000  |
| H | -3.9997660000 | 4.0253530000  | 0.1585550000  |
| O | 5.4895240000  | 0.3869150000  | 0.2093610000  |
| C | 1.7572380000  | -1.3538610000 | 0.2225660000  |
| C | 3.0360970000  | -0.8054110000 | 0.2317120000  |
| H | 1.5737670000  | -2.4103910000 | 0.3897320000  |
| H | 3.8995630000  | -1.4235650000 | 0.4323870000  |
| C | -2.4092840000 | 1.2327750000  | 1.2623360000  |
| C | -3.0428990000 | 2.4745690000  | 1.3019790000  |
| H | -2.0477730000 | 0.7786910000  | 2.1775700000  |
| H | -3.1733710000 | 2.9810280000  | 2.2514760000  |

**1a-OH (B3LYP-D3, H<sub>2</sub>O)**

|                  |   |             |
|------------------|---|-------------|
| $E_0 + E_{ZPE}$  | = | -754.964227 |
| $E_0 + E_{tot}$  | = | -754.947886 |
| $E_0 + H_{corr}$ | = | -754.946942 |
| $E_0 + G_{corr}$ | = | -755.011344 |

Coordinates:

|   |               |               |               |
|---|---------------|---------------|---------------|
| H | -2.6061940000 | 0.6482700000  | -2.0832090000 |
| H | -3.7326130000 | 2.8503270000  | -1.9941300000 |
| C | -2.7242320000 | 1.1578000000  | -1.1341670000 |
| C | -3.3579800000 | 2.4002750000  | -1.0820390000 |
| H | 0.0590300000  | -3.7732390000 | -0.8954280000 |
| H | -0.0247380000 | 1.4652190000  | -0.5401390000 |
| H | 2.2575290000  | 2.4260030000  | -0.5387360000 |
| C | 0.8244810000  | 0.8357050000  | -0.3189310000 |
| C | 2.1051130000  | 1.3797940000  | -0.3158090000 |
| O | 4.6589280000  | 2.3321640000  | -0.2522410000 |

|   |               |               |               |   |               |               |               |
|---|---------------|---------------|---------------|---|---------------|---------------|---------------|
| C | 0.6857990000  | -0.5148680000 | -0.0358220000 | O | 4.8391700000  | 1.8658630000  | -0.5064200000 |
| I | -1.3192000000 | -1.4208440000 | -0.0261890000 | H | -4.8369210000 | 0.3694680000  | -0.4937040000 |
| C | 3.1862020000  | 0.5539050000  | -0.0234170000 | H | -3.2216360000 | -1.5578410000 | -0.4168030000 |
| N | 4.5410950000  | 1.1337710000  | -0.0158730000 | C | 3.7719850000  | 1.0469710000  | -0.3018100000 |
| O | -0.1740680000 | -3.5203010000 | 0.0069670000  | C | -3.7881070000 | 0.5320440000  | -0.2767140000 |
| C | -2.2422640000 | 0.5890330000  | 0.0427130000  | C | -2.9016680000 | -0.5358250000 | -0.2485170000 |
| C | -3.5046000000 | 3.0587560000  | 0.1380490000  | C | 1.5407050000  | -0.6178460000 | -0.1018160000 |
| H | -3.9960480000 | 4.0239500000  | 0.1756140000  | O | -4.2942560000 | 2.8079010000  | -0.0776350000 |
| O | 5.4864930000  | 0.3902260000  | 0.2270070000  | C | -3.3421370000 | 1.8367760000  | -0.0260190000 |
| C | 1.7541220000  | -1.3488210000 | 0.2504190000  | C | -1.5679730000 | -0.2749810000 | 0.0291330000  |
| C | 3.0325560000  | -0.8003190000 | 0.2597290000  | I | -0.1819860000 | -1.9895030000 | 0.0521880000  |
| H | 1.5721980000  | -2.4013050000 | 0.4391220000  | H | -4.8160460000 | 4.7516840000  | 0.0740940000  |
| H | 3.8934130000  | -1.4139170000 | 0.4837930000  | O | -2.1389800000 | -3.3608430000 | 0.1029560000  |
| C | -2.3893310000 | 1.2358980000  | 1.2679400000  | C | -3.9067450000 | 4.1622250000  | 0.1696640000  |
| C | -3.0219990000 | 2.4781130000  | 1.3111710000  | H | 6.4176190000  | 2.8932550000  | 0.2193690000  |
| H | -2.0133240000 | 0.7858440000  | 2.1790970000  | C | -1.9920290000 | 2.0673110000  | 0.2546550000  |
| H | -3.1373620000 | 2.9888570000  | 2.2602440000  | C | -1.0929040000 | 0.9975010000  | 0.2798620000  |

#### 1a-OH (M06-2X, Toluene)

|                  |   |             |
|------------------|---|-------------|
| $E_0 + E_{ZPE}$  | = | -754.564042 |
| $E_0 + E_{tot}$  | = | -754.548099 |
| $E_0 + H_{corr}$ | = | -754.547154 |
| $E_0 + G_{corr}$ | = | -754.611051 |

Coordinates:

|   |               |               |               |
|---|---------------|---------------|---------------|
| H | -2.7376040000 | 0.6111650000  | -2.0151180000 |
| H | -3.7869620000 | 2.8456410000  | -1.9054020000 |
| C | -2.7515830000 | 1.1550330000  | -1.0761710000 |
| C | -3.3425420000 | 2.4150830000  | -1.0158860000 |
| H | -0.0417950000 | -3.6938300000 | -0.9160100000 |
| H | 2.2613620000  | 2.3308250000  | -0.7553090000 |
| H | -0.0317920000 | 1.3831320000  | -0.7518190000 |
| C | 0.8050750000  | 0.7707850000  | -0.4460310000 |
| C | 2.0856510000  | 1.3099610000  | -0.4457810000 |
| O | 4.6225480000  | 2.2462640000  | -0.3681470000 |
| C | 0.6422980000  | -0.5487520000 | -0.0538530000 |
| C | 3.1417190000  | 0.5104040000  | -0.0397340000 |
| N | 4.5016060000  | 1.0876070000  | -0.0325080000 |
| O | -0.2281950000 | -3.3747540000 | -0.0278740000 |
| I | -1.3398180000 | -1.4244100000 | -0.0268840000 |
| C | -2.1773280000 | 0.6023220000  | 0.0641590000  |
| C | -3.3580880000 | 3.1168310000  | 0.1844580000  |
| H | -3.8162300000 | 4.0973990000  | 0.2328850000  |
| O | 5.4157930000  | 0.3691000000  | 0.3081320000  |
| C | 1.6983510000  | -1.3536690000 | 0.3425870000  |
| C | 2.9761660000  | -0.8074220000 | 0.3550510000  |
| H | 1.5090800000  | -2.3877500000 | 0.6047120000  |
| H | 3.8301480000  | -1.3946980000 | 0.6637230000  |
| C | -2.1996660000 | 1.3007330000  | 1.2677520000  |
| C | -2.7880240000 | 2.5600980000  | 1.3260830000  |
| H | -1.7564530000 | 0.8701280000  | 2.1596280000  |
| H | -2.8039860000 | 3.1051620000  | 2.2624170000  |

#### 1c-OH (B3LYP-D3, CH<sub>2</sub>Cl<sub>2</sub>)

|                  |   |             |
|------------------|---|-------------|
| $E_0 + E_{ZPE}$  | = | -779.455498 |
| $E_0 + E_{tot}$  | = | -779.436549 |
| $E_0 + H_{corr}$ | = | -779.435605 |
| $E_0 + G_{corr}$ | = | -779.504785 |

Coordinates:

|   |               |               |               |
|---|---------------|---------------|---------------|
| H | 3.3519340000  | 1.1082250000  | -2.4051190000 |
| H | 1.3688790000  | -0.3686920000 | -2.2404580000 |
| C | 3.0368350000  | 0.7100970000  | -1.4480100000 |
| C | 1.9302600000  | -0.1189250000 | -1.3476460000 |
| H | -3.1716990000 | 4.5027040000  | -0.5659060000 |

|   |               |               |               |
|---|---------------|---------------|---------------|
| O | 4.8391700000  | 1.8658630000  | -0.5064200000 |
| H | -4.8369210000 | 0.3694680000  | -0.4937040000 |
| H | -3.2216360000 | -1.5578410000 | -0.4168030000 |
| C | 3.7719850000  | 1.0469710000  | -0.3018100000 |
| C | -3.7881070000 | 0.5320440000  | -0.2767140000 |
| C | -2.9016680000 | -0.5358250000 | -0.2485170000 |
| C | 1.5407050000  | -0.6178460000 | -0.1018160000 |
| O | -4.2942560000 | 2.8079010000  | -0.0776350000 |
| C | -3.3421370000 | 1.8367760000  | -0.0260190000 |
| C | -1.5679730000 | -0.2749810000 | 0.0291330000  |
| I | -0.1819860000 | -1.9895030000 | 0.0521880000  |
| H | -4.8160460000 | 4.7516840000  | 0.0740940000  |
| O | -2.1389800000 | -3.3608430000 | 0.1029560000  |
| C | -3.9067450000 | 4.1622250000  | 0.1696640000  |
| H | 6.4176190000  | 2.8932550000  | 0.2193690000  |
| C | -1.9920290000 | 2.0673110000  | 0.2546550000  |
| C | -1.0929040000 | 0.9975010000  | 0.2798620000  |
| H | -1.6189570000 | 3.0615880000  | 0.4557360000  |
| H | -0.0494080000 | 1.1855690000  | 0.4898360000  |
| C | 5.6374480000  | 2.2480880000  | 0.6174600000  |
| C | 3.3871240000  | 0.5443410000  | 0.9451530000  |
| H | -2.4649310000 | -3.4400240000 | 1.0082350000  |
| C | 2.2688800000  | -0.2878780000 | 1.0351690000  |
| H | 6.0930010000  | 1.3743510000  | 1.0930640000  |
| H | -3.5005810000 | 4.2784960000  | 1.1790380000  |
| H | 5.0448060000  | 2.8015430000  | 1.3520350000  |
| H | 3.9372150000  | 0.7886110000  | 1.8432480000  |
| H | 1.9744600000  | -0.6680240000 | 2.0067650000  |

#### 1c-OH (B3LYP-D3, H<sub>2</sub>O)

|                  |   |             |
|------------------|---|-------------|
| $E_0 + E_{ZPE}$  | = | -779.459300 |
| $E_0 + E_{tot}$  | = | -779.440279 |
| $E_0 + H_{corr}$ | = | -779.439335 |
| $E_0 + G_{corr}$ | = | -779.508743 |

Coordinates:

|   |               |               |               |
|---|---------------|---------------|---------------|
| H | 3.3580460000  | 1.0909040000  | -2.4093620000 |
| H | 1.3780910000  | -0.3884490000 | -2.2438530000 |
| C | 3.0410510000  | 0.6978890000  | -1.4507700000 |
| C | 1.9354970000  | -0.1324680000 | -1.3505630000 |
| H | -3.1689490000 | 4.5039650000  | -0.5632990000 |
| O | 4.8366780000  | 1.8629650000  | -0.5080730000 |
| H | -4.8353660000 | 0.3688190000  | -0.5020010000 |
| H | -3.2211610000 | -1.5565830000 | -0.4237400000 |
| C | 3.7707400000  | 1.0431760000  | -0.3033490000 |
| C | -3.7871250000 | 0.5321550000  | -0.2826670000 |
| C | -2.9002670000 | -0.5355040000 | -0.2535560000 |
| C | 1.5435400000  | -0.6231400000 | -0.1024150000 |
| O | -4.2936880000 | 2.8078510000  | -0.0820190000 |
| C | -3.3418840000 | 1.8368260000  | -0.0292980000 |
| C | -1.5674300000 | -0.2744010000 | 0.0274440000  |
| I | -0.1778150000 | -1.9851000000 | 0.0543680000  |
| H | -4.8151470000 | 4.7526240000  | 0.0724170000  |
| O | -2.1503210000 | -3.3805800000 | 0.1081520000  |
| C | -3.9061320000 | 4.1631440000  | 0.1695040000  |
| H | 6.4036580000  | 2.9074740000  | 0.2209170000  |
| C | -1.9924700000 | 2.0673120000  | 0.2553310000  |
| C | -1.0931820000 | 0.9978080000  | 0.2818010000  |
| H | -1.6200450000 | 3.0611630000  | 0.4592030000  |
| H | -0.0507030000 | 1.1864980000  | 0.4962150000  |
| C | 5.6251290000  | 2.2607100000  | 0.6193910000  |
| C | 3.3823470000  | 0.5469440000  | 0.9453100000  |
| H | -2.4960860000 | -3.4240860000 | 1.0085380000  |

|   |               |               |              |
|---|---------------|---------------|--------------|
| C | 2.2656520000  | -0.2866220000 | 1.0366000000 |
| H | 6.0824050000  | 1.3939140000  | 1.1052370000 |
| H | -3.5029490000 | 4.2761870000  | 1.1800750000 |
| H | 5.0227720000  | 2.8161650000  | 1.3439780000 |
| H | 3.9278700000  | 0.7979250000  | 1.8441850000 |
| H | 1.9676220000  | -0.6610860000 | 2.0089670000 |

**1c-OH (M06-2X, Toluene)**

|                  |   |             |
|------------------|---|-------------|
| $E_0 + E_{ZPE}$  | = | -779.040117 |
| $E_0 + E_{tot}$  | = | -779.021599 |
| $E_0 + H_{corr}$ | = | -779.020654 |
| $E_0 + G_{corr}$ | = | -779.089059 |

Coordinates:

|   |               |               |               |
|---|---------------|---------------|---------------|
| H | -2.2394930000 | -0.9145210000 | -1.8794780000 |
| H | -4.1851550000 | 0.5634380000  | -1.7169320000 |
| H | -5.1934850000 | 2.6155690000  | -1.4225180000 |
| H | 1.5328650000  | 3.0182350000  | -0.9901570000 |
| C | -2.4227100000 | -0.3888290000 | -0.9478490000 |
| H | 2.3685020000  | -3.2796540000 | -0.9458120000 |
| H | -0.0355260000 | 1.1041780000  | -0.9178860000 |
| C | -3.5322000000 | 0.4548690000  | -0.8616480000 |
| H | -6.2036400000 | 1.2593880000  | -0.8414130000 |
| C | 1.8570890000  | 2.0547020000  | -0.6172260000 |
| C | 0.9847220000  | 0.9802610000  | -0.5793740000 |
| C | -5.7114910000 | 2.1936910000  | -0.5564450000 |
| H | 5.8421350000  | 2.2005920000  | -0.3995770000 |
| O | 3.9431020000  | 3.0275330000  | -0.2431740000 |
| H | -6.4547400000 | 2.9009300000  | -0.1973700000 |
| C | 3.1744300000  | 1.9142740000  | -0.1718430000 |
| C | 1.4504420000  | -0.2383940000 | -0.1039430000 |
| O | 2.0255370000  | -3.1587480000 | -0.0553380000 |
| I | 0.1236310000  | -1.9410730000 | -0.0121770000 |
| H | 5.7199440000  | 3.9182290000  | 0.0559710000  |
| C | -1.5636400000 | -0.5521750000 | 0.1274610000  |
| C | 5.2868990000  | 2.9310380000  | 0.1955620000  |
| C | 3.6186880000  | 0.6812510000  | 0.3033190000  |
| C | -3.7742070000 | 1.1422030000  | 0.3258150000  |
| C | 2.7485250000  | -0.4079140000 | 0.3317260000  |
| O | -4.8153320000 | 1.9881090000  | 0.5207860000  |
| H | 4.6324820000  | 0.5441080000  | 0.6530090000  |
| H | 3.0778920000  | -1.3856360000 | 0.6607320000  |
| H | 5.3345830000  | 2.6567050000  | 1.2530810000  |
| C | -1.8202810000 | 0.1360040000  | 1.3151490000  |
| C | -2.9118090000 | 0.9784810000  | 1.4160110000  |
| H | -1.1573680000 | 0.0214610000  | 2.1665810000  |
| H | -3.1246460000 | 1.5219030000  | 2.3286540000  |

**1d-OH (B3LYP-D3, CH<sub>2</sub>Cl<sub>2</sub>)**

|                  |   |             |
|------------------|---|-------------|
| $E_0 + E_{ZPE}$  | = | -550.394654 |
| $E_0 + E_{tot}$  | = | -550.380914 |
| $E_0 + H_{corr}$ | = | -550.379969 |
| $E_0 + G_{corr}$ | = | -550.437422 |

Coordinates:

|   |               |               |               |
|---|---------------|---------------|---------------|
| H | -2.0655070000 | -0.4246750000 | -2.0597200000 |
| H | -4.2188490000 | 0.7935680000  | -1.9771790000 |
| C | -2.4222260000 | -0.0201050000 | -1.1193970000 |
| C | -3.6356150000 | 0.6689250000  | -1.0718680000 |
| H | 2.6914230000  | -2.4951450000 | -0.8494590000 |
| H | 1.0567950000  | 3.8164090000  | -0.7429340000 |
| H | -0.2910320000 | 1.7477000000  | -0.7154140000 |
| C | 1.5196300000  | 2.8843480000  | -0.4403860000 |
| C | 0.7513120000  | 1.7177020000  | -0.4319190000 |
| H | 3.4484920000  | 3.7607650000  | -0.0751090000 |

|   |               |               |               |
|---|---------------|---------------|---------------|
| C | 2.8617090000  | 2.8497980000  | -0.0677800000 |
| C | 1.3734950000  | 0.5411500000  | -0.0497690000 |
| I | 0.2131300000  | -1.3398830000 | -0.0146360000 |
| O | 2.3161120000  | -2.4495550000 | 0.0389350000  |
| C | -1.6754700000 | -0.1745920000 | 0.0463340000  |
| C | -4.0917350000 | 1.1965230000  | 0.1349890000  |
| H | -5.0331570000 | 1.7325570000  | 0.1698590000  |
| C | 3.4492350000  | 1.6442380000  | 0.3112510000  |
| C | 2.7035850000  | 0.4631100000  | 0.3205500000  |
| H | 3.1326630000  | -0.4971900000 | 0.5818460000  |
| H | 4.4925560000  | 1.6108560000  | 0.6029480000  |
| C | -2.1279560000 | 0.3446730000  | 1.2575200000  |
| C | -3.3393800000 | 1.0344340000  | 1.2986260000  |
| H | -1.5438180000 | 0.2214620000  | 2.1621560000  |
| H | -3.6938790000 | 1.4427010000  | 2.2383280000  |

**1d-OH (B3LYP-D3, H<sub>2</sub>O)**

|                  |   |             |
|------------------|---|-------------|
| $E_0 + E_{ZPE}$  | = | -550.397657 |
| $E_0 + E_{tot}$  | = | -550.383852 |
| $E_0 + H_{corr}$ | = | -550.382908 |
| $E_0 + G_{corr}$ | = | -550.440604 |

Coordinates:

|   |               |               |               |
|---|---------------|---------------|---------------|
| H | -2.0672850000 | -0.4275200000 | -2.0577920000 |
| H | -4.2178250000 | 0.7954350000  | -1.9727770000 |
| C | -2.4225530000 | -0.0223810000 | -1.1174680000 |
| C | -3.6342640000 | 0.6694870000  | -1.0680100000 |
| H | 2.7194050000  | -2.4741460000 | -0.8478740000 |
| H | 1.0663010000  | 3.8108210000  | -0.7677970000 |
| H | -0.2829030000 | 1.7436080000  | -0.7426130000 |
| C | 1.5253540000  | 2.8806070000  | -0.4543160000 |
| C | 0.7560940000  | 1.7144570000  | -0.4468920000 |
| H | 3.4507940000  | 3.7582450000  | -0.0740580000 |
| C | 2.8634750000  | 2.8477130000  | -0.0671590000 |
| C | 1.3736470000  | 0.5403100000  | -0.0500850000 |
| I | 0.2081500000  | -1.3362570000 | -0.0164750000 |
| O | 2.3281760000  | -2.4667190000 | 0.0348100000  |
| C | -1.6763550000 | -0.1768550000 | 0.0484170000  |
| C | -4.0875240000 | 1.1985710000  | 0.1393720000  |
| H | -5.0273790000 | 1.7371580000  | 0.1750440000  |
| C | 3.4465400000  | 1.6442210000  | 0.3254640000  |
| C | 2.6998380000  | 0.4636620000  | 0.3343850000  |
| H | 3.1268980000  | -0.4942540000 | 0.6058820000  |
| H | 4.4867800000  | 1.6121840000  | 0.6279650000  |
| C | -2.1244030000 | 0.3429900000  | 1.2608570000  |
| C | -3.3342550000 | 1.0355170000  | 1.3024350000  |
| H | -1.5392870000 | 0.2187880000  | 2.1644970000  |
| H | -3.6864110000 | 1.4452620000  | 2.2422550000  |

**1d-OH (M06-2X, Toluene)**

|                  |   |             |
|------------------|---|-------------|
| $E_0 + E_{ZPE}$  | = | -550.077588 |
| $E_0 + E_{tot}$  | = | -550.064193 |
| $E_0 + H_{corr}$ | = | -550.063249 |
| $E_0 + G_{corr}$ | = | -550.119669 |

Coordinates:

|   |               |               |               |
|---|---------------|---------------|---------------|
| H | -2.2052350000 | -0.6839100000 | -1.9469120000 |
| H | -4.3428470000 | 0.5495440000  | -1.8417750000 |
| C | -2.4770930000 | -0.1542520000 | -1.0395170000 |
| H | 1.0552460000  | 3.7139010000  | -1.0275280000 |
| C | -3.6833240000 | 0.5416670000  | -0.9818740000 |
| H | -0.2674100000 | 1.6333100000  | -0.9619090000 |
| H | 2.6480180000  | -2.4124460000 | -0.8236480000 |
| C | 1.4989300000  | 2.8138400000  | -0.6195490000 |
| C | 0.7484520000  | 1.6404960000  | -0.5902220000 |



|   |               |               |               |   |               |               |               |
|---|---------------|---------------|---------------|---|---------------|---------------|---------------|
| H | 3.3754340000  | 3.7473810000  | -0.1539750000 | C | -3.1472330000 | 1.0855170000  | -0.5103490000 |
| C | 2.8008620000  | 2.8293380000  | -0.1328490000 | C | -3.5389790000 | 2.4190910000  | -0.4223620000 |
| C | 1.3435710000  | 0.5007150000  | -0.0774820000 | O | -3.5376560000 | -1.7669000000 | -0.1760880000 |
| I | 0.2198950000  | -1.3520340000 | -0.0020840000 | N | 4.8128130000  | 0.4775490000  | -0.0999290000 |
| O | 2.2465490000  | -2.3389890000 | 0.0475540000  | C | 3.3884440000  | 0.0870160000  | -0.0790040000 |
| C | -1.6277100000 | -0.1656150000 | 0.0614960000  | I | -1.3634730000 | -1.3489660000 | -0.0559000000 |
| C | -4.0354340000 | 1.2253010000  | 0.1761390000  | C | 0.7372520000  | -0.6367480000 | -0.0409100000 |
| H | -4.9720080000 | 1.7681370000  | 0.2213610000  | C | -1.9699140000 | 0.7165880000  | 0.1154790000  |
| C | 3.3661590000  | 1.6659280000  | 0.3769210000  | C | -2.7719890000 | 3.3359860000  | 0.2879730000  |
| C | 2.6400970000  | 0.4773320000  | 0.4040340000  | H | -3.0884710000 | 4.3696740000  | 0.3545160000  |
| H | 4.3808090000  | 1.6723630000  | 0.7563070000  | H | -3.9699880000 | -1.7386920000 | 0.6827680000  |
| H | 3.0614440000  | -0.4552810000 | 0.7580810000  | O | 5.5172290000  | 0.0914260000  | 0.8083270000  |
| C | -1.9843680000 | 0.5126090000  | 1.2236820000  | C | -1.1834770000 | 1.6014930000  | 0.8325860000  |
| C | -3.1859640000 | 1.2110860000  | 1.2793370000  | C | -1.6029330000 | 2.9267910000  | 0.9191320000  |
| H | -1.3249360000 | 0.5047690000  | 2.0855460000  | C | 2.9361170000  | -0.7155610000 | 0.9552520000  |
| H | -3.4604350000 | 1.7412740000  | 2.1837720000  | C | 1.5920370000  | -1.0746830000 | 0.9654810000  |

### 1l-OH (M06-2X, Toluene)

|                  |   |             |
|------------------|---|-------------|
| $E_0 + E_{ZPE}$  | = | -642.318268 |
| $E_0 + E_{tot}$  | = | -642.303091 |
| $E_0 + H_{corr}$ | = | -642.302147 |
| $E_0 + G_{corr}$ | = | -642.363137 |

Coordinates:

|   |               |               |               |
|---|---------------|---------------|---------------|
| H | 2.5391690000  | 0.4049210000  | -2.0140580000 |
| H | 3.7886010000  | 2.5337610000  | -1.9177170000 |
| C | 2.5863000000  | 0.9600960000  | -1.0828130000 |
| C | 3.2906060000  | 2.1611560000  | -1.0303920000 |
| H | -0.6461640000 | -3.5724840000 | -0.8702980000 |
| H | -2.2989460000 | 2.6074510000  | -0.8692800000 |
| H | -0.1239700000 | 1.4395220000  | -0.8461910000 |
| C | -2.2349500000 | 1.5890110000  | -0.5082100000 |
| C | -1.0126370000 | 0.9291060000  | -0.5006520000 |
| N | -5.6500000000 | 2.1749000000  | -0.0623050000 |
| C | -4.6408600000 | 1.6232640000  | -0.0569830000 |
| C | -3.3794600000 | 0.9347380000  | -0.0515440000 |
| C | -0.9738090000 | -0.3800250000 | -0.0489450000 |
| I | 0.9078760000  | -1.4543530000 | -0.0162960000 |
| O | -0.4037920000 | -3.2745250000 | 0.0116370000  |
| C | 1.9434080000  | 0.4823800000  | 0.0543600000  |
| C | 3.3500400000  | 2.8795280000  | 0.1587010000  |
| H | 3.8961400000  | 3.8143300000  | 0.1995510000  |
| C | -2.0963190000 | -1.0550680000 | 0.4005760000  |
| C | -3.3112210000 | -0.3826560000 | 0.4042650000  |
| H | -2.0086540000 | -2.0902220000 | 0.7068580000  |
| H | -4.2050460000 | -0.8812550000 | 0.7572610000  |
| C | 2.0097300000  | 1.1970440000  | 1.2470130000  |
| C | 2.7109050000  | 2.3975230000  | 1.2976350000  |
| H | 1.5117690000  | 0.8254920000  | 2.1366330000  |
| H | 2.7596090000  | 2.9545320000  | 2.2258840000  |

### 1m-OH (M06-2X, Toluene)

|                  |   |             |
|------------------|---|-------------|
| $E_0 + E_{ZPE}$  | = | -754.565816 |
| $E_0 + E_{tot}$  | = | -754.549966 |
| $E_0 + H_{corr}$ | = | -754.549021 |
| $E_0 + G_{corr}$ | = | -754.612014 |

Coordinates:

|   |               |              |               |
|---|---------------|--------------|---------------|
| H | 2.9622170000  | 1.1623190000 | -1.8851060000 |
| H | 0.5610950000  | 0.5112790000 | -1.8564990000 |
| C | 2.5605250000  | 0.5392190000 | -1.0977580000 |
| C | 1.2241360000  | 0.1657880000 | -1.0705030000 |
| O | 5.1959120000  | 1.1624700000 | -1.0241320000 |
| H | -3.7458900000 | 0.3411530000 | -1.0185950000 |
| H | -4.4521820000 | 2.7338870000 | -0.9125470000 |

|   |               |               |               |
|---|---------------|---------------|---------------|
| C | -3.1472330000 | 1.0855170000  | -0.5103490000 |
| C | -3.5389790000 | 2.4190910000  | -0.4223620000 |
| O | -3.5376560000 | -1.7669000000 | -0.1760880000 |
| N | 4.8128130000  | 0.4775490000  | -0.0999290000 |
| C | 3.3884440000  | 0.0870160000  | -0.0790040000 |
| I | -1.3634730000 | -1.3489660000 | -0.0559000000 |
| C | 0.7372520000  | -0.6367480000 | -0.0409100000 |
| C | -1.9699140000 | 0.7165880000  | 0.1154790000  |
| C | -2.7719890000 | 3.3359860000  | 0.2879730000  |
| H | -3.0884710000 | 4.3696740000  | 0.3545160000  |
| H | -3.9699880000 | -1.7386920000 | 0.6827680000  |
| O | 5.5172290000  | 0.0914260000  | 0.8083270000  |
| C | -1.1834770000 | 1.6014930000  | 0.8325860000  |
| C | -1.6029330000 | 2.9267910000  | 0.9191320000  |
| C | 2.9361170000  | -0.7155610000 | 0.9552520000  |
| C | 1.5920370000  | -1.0746830000 | 0.9654810000  |
| H | -0.2708780000 | 1.2841290000  | 1.3200920000  |
| H | -1.0087930000 | 3.6330890000  | 1.4858730000  |
| H | 3.6191450000  | -1.0429340000 | 1.7271860000  |
| H | 1.2203220000  | -1.7004870000 | 1.7695650000  |

### 1n-OH (M06-2X, Toluene)

|                  |   |              |
|------------------|---|--------------|
| $E_0 + E_{ZPE}$  | = | -1469.297103 |
| $E_0 + E_{tot}$  | = | -1469.281272 |
| $E_0 + H_{corr}$ | = | -1469.280328 |
| $E_0 + G_{corr}$ | = | -1469.343890 |

Coordinates:

|    |               |               |               |
|----|---------------|---------------|---------------|
| H  | 2.0802850000  | -0.9544270000 | -2.0323650000 |
| H  | 4.0629180000  | 0.5282190000  | -1.9768760000 |
| C  | 3.3270540000  | -0.4272170000 | -1.1167770000 |
| C  | 3.4437120000  | 0.4049100000  | -1.0973660000 |
| H  | -1.5903850000 | 2.9817140000  | -0.9606390000 |
| H  | -0.0351520000 | 1.0645260000  | -0.9445960000 |
| H  | -2.4198140000 | -3.3480110000 | -0.7895930000 |
| C  | -1.9095780000 | 2.0273560000  | -0.5624940000 |
| C  | -1.0369900000 | 0.9437500000  | -0.5551110000 |
| Cl | -4.2794040000 | 3.2343060000  | -0.0590470000 |
| C  | -3.1919750000 | 1.8719890000  | -0.0552810000 |
| C  | -1.4850250000 | -0.2647390000 | -0.0498670000 |
| I  | -0.1619390000 | -1.9755350000 | -0.0076600000 |
| C  | 1.5373780000  | -0.5765970000 | 0.0175740000  |
| C  | 3.7528490000  | 1.0818430000  | 0.0737730000  |
| O  | -2.0515150000 | -3.1690620000 | 0.0808920000  |
| Cl | 5.1460970000  | 2.1307500000  | 0.1114410000  |
| C  | -2.7649550000 | -0.4363140000 | 0.4480220000  |
| C  | -3.6279620000 | 0.6545890000  | 0.4494430000  |
| H  | -3.0784760000 | -1.4123350000 | 0.7969510000  |
| H  | -4.6325730000 | 0.5536960000  | 0.8394460000  |
| C  | 1.8705180000  | 0.1049160000  | 1.1846290000  |
| C  | 2.9792200000  | 0.9425610000  | 1.2195310000  |
| H  | 1.2643910000  | -0.0049810000 | 2.0778180000  |
| H  | 3.2444390000  | 1.4791980000  | 2.1215650000  |

### 1o-OH (M06-2X, Toluene)

|                  |   |             |
|------------------|---|-------------|
| $E_0 + E_{ZPE}$  | = | -748.577084 |
| $E_0 + E_{tot}$  | = | -748.562073 |
| $E_0 + H_{corr}$ | = | -748.561129 |
| $E_0 + G_{corr}$ | = | -748.621577 |

Coordinates:

|   |              |               |               |
|---|--------------|---------------|---------------|
| H | 2.1123300000 | -0.7440270000 | -2.0132340000 |
| H | 4.1828700000 | 0.6423910000  | -1.9320620000 |
| C | 2.3788160000 | -0.2279390000 | -1.0969700000 |
| C | 3.5379260000 | 0.5437890000  | -1.0680550000 |

|   |               |               |               |
|---|---------------|---------------|---------------|
| H | -1.4272070000 | 3.3618000000  | -0.9490460000 |
| H | 0.0714770000  | 1.3771860000  | -0.9238490000 |
| H | -2.4874170000 | -2.9487000000 | -0.8097090000 |
| C | -1.7713150000 | 2.4103560000  | -0.5645600000 |
| C | -0.9402980000 | 1.2944780000  | -0.5507040000 |
| F | -3.8571510000 | 3.3667240000  | -0.0838350000 |
| C | -3.0585410000 | 2.2862160000  | -0.0752760000 |
| C | -1.4409510000 | 0.1006710000  | -0.0579860000 |
| I | -0.1830860000 | -1.6568720000 | -0.0060680000 |
| C | 1.5725520000  | -0.3348820000 | 0.0316200000  |
| O | -2.1187810000 | -2.7873320000 | 0.0641150000  |
| C | 3.8585970000  | 1.1965680000  | 0.1074660000  |
| F | 4.9743120000  | 1.9465500000  | 0.1463340000  |
| C | -3.5570570000 | 1.0940950000  | 0.4174840000  |
| C | -2.7336920000 | -0.0269170000 | 0.4221220000  |
| H | -3.0843210000 | -0.9936760000 | 0.7615490000  |
| H | -4.5728370000 | 1.0452320000  | 0.7880710000  |
| C | 1.9283340000  | 0.3309660000  | 1.2020110000  |
| C | 3.0790110000  | 1.1095120000  | 1.2481790000  |
| H | 1.3072950000  | 0.2527950000  | 2.0880860000  |
| H | 3.3769060000  | 1.6389500000  | 2.1444110000  |

#### 1a-(OH)<sub>2</sub> (B3LYP-D3, CH<sub>2</sub>Cl<sub>2</sub>)

|                                    |   |             |
|------------------------------------|---|-------------|
| E <sub>0</sub> + E <sub>ZPE</sub>  | = | -830.917695 |
| E <sub>0</sub> + E <sub>tot</sub>  | = | -830.898289 |
| E <sub>0</sub> + H <sub>corr</sub> | = | -830.897345 |
| E <sub>0</sub> + G <sub>corr</sub> | = | -830.968297 |

Coordinates:

|   |               |               |               |
|---|---------------|---------------|---------------|
| H | -2.1299940000 | 1.0177790000  | -2.1387560000 |
| H | -2.9118670000 | 3.3658390000  | -2.1216030000 |
| C | -2.2549590000 | 1.5397580000  | -1.1976320000 |
| C | -2.6967340000 | 2.8630660000  | -1.1852600000 |
| H | -0.5670950000 | -3.9859890000 | -0.6945570000 |
| H | 2.7342780000  | 2.3522710000  | -0.1033460000 |
| H | 0.3651200000  | 1.6580930000  | -0.1028830000 |
| O | -3.7312730000 | -1.6628640000 | -0.1025960000 |
| C | 1.1374590000  | 0.9029550000  | -0.0620930000 |
| C | 2.4688660000  | 1.3051480000  | -0.0619330000 |
| O | 5.1202540000  | 1.9548520000  | -0.0482980000 |
| C | 0.8170210000  | -0.4538200000 | -0.0116050000 |
| C | 3.4636440000  | 0.3310230000  | -0.0087220000 |
| N | 4.8697190000  | 0.7509920000  | -0.0074010000 |
| I | -1.3247780000 | -1.2032660000 | -0.0001110000 |
| C | -1.9804840000 | 0.8976530000  | 0.0065370000  |
| C | -2.8620400000 | 3.5351600000  | 0.0256670000  |
| H | -3.2062090000 | 4.5630710000  | 0.0327300000  |
| O | 5.7391310000  | -0.1175500000 | 0.0345160000  |
| C | 1.8234230000  | -1.4176630000 | 0.0412530000  |
| C | 3.1584800000  | -1.0286200000 | 0.0424630000  |
| H | 1.5318930000  | -2.4656550000 | 0.0718660000  |
| O | -0.2472340000 | -3.5112360000 | 0.0818900000  |
| H | 3.9524190000  | -1.7616630000 | 0.0824580000  |
| H | -4.1143250000 | -1.4992900000 | 0.7677790000  |
| C | -2.1435670000 | 1.5599570000  | 1.2199350000  |
| C | -2.5867900000 | 2.8834250000  | 1.2270590000  |
| H | -1.9267260000 | 1.0564270000  | 2.1548740000  |
| H | -2.7152500000 | 3.4014250000  | 2.1709870000  |

#### 1a-(OH)<sub>2</sub> (B3LYP-D3, H<sub>2</sub>O)

|                                    |   |             |
|------------------------------------|---|-------------|
| E <sub>0</sub> + E <sub>ZPE</sub>  | = | -830.930568 |
| E <sub>0</sub> + E <sub>tot</sub>  | = | -830.910957 |
| E <sub>0</sub> + H <sub>corr</sub> | = | -830.910013 |
| E <sub>0</sub> + G <sub>corr</sub> | = | -830.982197 |

Coordinates:

|   |               |               |               |
|---|---------------|---------------|---------------|
| H | -2.2417610000 | 0.9909230000  | -2.1040200000 |
| H | -3.0627260000 | 3.3249380000  | -2.0501550000 |
| C | -2.3315510000 | 1.5112540000  | -1.1579050000 |
| C | -2.7931620000 | 2.8281880000  | -1.1250600000 |
| H | -0.2157340000 | -3.8667080000 | -0.8796720000 |
| H | -4.2020780000 | -0.9791990000 | -0.4606270000 |
| H | 2.7235790000  | 2.3394400000  | -0.3559050000 |
| H | 0.3581000000  | 1.6302630000  | -0.3534040000 |
| C | 2.4626270000  | 1.3010970000  | -0.2073850000 |
| C | 1.1333580000  | 0.8915880000  | -0.2059860000 |
| O | 5.1104260000  | 1.9668920000  | -0.1785600000 |
| C | 0.8225450000  | -0.4542280000 | -0.0180650000 |
| N | 4.8629020000  | 0.7734050000  | -0.0159460000 |
| C | 3.4585130000  | 0.3460800000  | -0.0153390000 |
| I | -1.3012020000 | -1.2045900000 | -0.0139180000 |
| O | -0.2616600000 | -3.5383090000 | 0.0266220000  |
| C | -1.9857200000 | 0.8800810000  | 0.0336760000  |
| O | -3.7616490000 | -1.6742640000 | 0.0430140000  |
| C | -2.9028740000 | 3.5010550000  | 0.0911530000  |
| H | -3.2595250000 | 4.5242670000  | 0.1136830000  |
| O | 5.7329160000  | -0.0802150000 | 0.1457300000  |
| C | 1.8277420000  | -1.4003920000 | 0.1699310000  |
| C | 3.1597880000  | -1.0023160000 | 0.1738500000  |
| H | 1.5432510000  | -2.4422090000 | 0.2941660000  |
| H | 3.9551050000  | -1.7198860000 | 0.3201520000  |
| C | -2.0937520000 | 1.5412760000  | 1.2537290000  |
| C | -2.5537100000 | 2.8583180000  | 1.2787360000  |
| H | -1.8203330000 | 1.0438630000  | 2.1764900000  |
| H | -2.6375610000 | 3.3789000000  | 2.2259780000  |

#### 1c-(OH)<sub>2</sub> (B3LYP-D3, CH<sub>2</sub>Cl<sub>2</sub>)

|                                    |   |             |
|------------------------------------|---|-------------|
| E <sub>0</sub> + E <sub>ZPE</sub>  | = | -855.404802 |
| E <sub>0</sub> + E <sub>tot</sub>  | = | -855.382778 |
| E <sub>0</sub> + H <sub>corr</sub> | = | -855.381834 |
| E <sub>0</sub> + G <sub>corr</sub> | = | -855.457599 |

Coordinates:

|   |               |               |               |
|---|---------------|---------------|---------------|
| H | -1.4682730000 | 0.0407700000  | -2.0285460000 |
| H | -3.2149600000 | 1.7572020000  | -1.9497350000 |
| H | -5.3887340000 | 2.5512890000  | -1.5320200000 |
| H | -4.1397800000 | 3.8065440000  | -1.2791720000 |
| C | -1.9222950000 | 0.2875310000  | -1.0761210000 |
| C | -2.9157600000 | 1.2687010000  | -1.0326520000 |
| C | -4.9472000000 | 3.2397360000  | -0.8048100000 |
| H | 4.8822000000  | 0.1706700000  | -0.6708260000 |
| H | 3.1024550000  | -1.6037970000 | -0.6075150000 |
| H | -5.7108740000 | 3.9274570000  | -0.4469090000 |
| H | 3.5982040000  | 4.4319270000  | -0.4146520000 |
| C | 3.8636910000  | 0.4121640000  | -0.3881940000 |
| C | 2.8790310000  | -0.5678900000 | -0.3682430000 |
| O | 2.0354700000  | -3.4714200000 | -0.2349690000 |
| O | 4.5951940000  | 2.6230980000  | -0.0926120000 |
| H | -1.6941350000 | -4.2544090000 | -0.0799670000 |
| C | 3.5557830000  | 1.7327750000  | -0.0402870000 |
| I | 0.0451610000  | -1.8827410000 | -0.0054010000 |
| C | 1.5751160000  | -0.2350770000 | -0.0053110000 |
| O | -2.0328500000 | -3.3596400000 | 0.0472060000  |
| C | -1.5168290000 | -0.3563930000 | 0.0843080000  |
| H | 5.2898820000  | 4.5033760000  | 0.1404870000  |
| C | -3.5051330000 | 1.5979000000  | 0.1914250000  |
| C | 4.3403180000  | 3.9836390000  | 0.2539980000  |
| C | 2.2506660000  | 2.0624130000  | 0.3306040000  |

|   |               |               |              |
|---|---------------|---------------|--------------|
| C | 1.2630940000  | 1.0704810000  | 0.3437910000 |
| O | -4.4796430000 | 2.5416140000  | 0.3504450000 |
| H | 1.9826590000  | 3.0723610000  | 0.6100760000 |
| H | 0.2565020000  | 1.3463960000  | 0.6296070000 |
| H | 2.2798240000  | -3.7877620000 | 0.6431160000 |
| H | 3.9987130000  | 4.0729970000  | 1.2903840000 |
| C | -2.1103600000 | -0.0333390000 | 1.3039260000 |
| C | -3.0993000000 | 0.9400130000  | 1.3592360000 |
| H | -1.8063440000 | -0.5382130000 | 2.2128380000 |
| H | -3.5711530000 | 1.2033340000  | 2.2984870000 |

**1c-(OH)<sub>2</sub> (B3LYP-D3, H<sub>2</sub>O)**

|                  |   |             |
|------------------|---|-------------|
| $E_0 + E_{ZPE}$  | = | -855.419794 |
| $E_0 + E_{tot}$  | = | -855.397491 |
| $E_0 + H_{corr}$ | = | -855.396547 |
| $E_0 + G_{corr}$ | = | -855.473706 |

Coordinates:

|   |               |               |               |
|---|---------------|---------------|---------------|
| H | -1.4069270000 | 0.0909110000  | -2.0215560000 |
| H | -3.1557620000 | 1.8037850000  | -1.9572050000 |
| H | -5.3333420000 | 2.6066610000  | -1.5905230000 |
| H | -4.0877060000 | 3.8475880000  | -1.2601210000 |
| C | -1.8881370000 | 0.3170970000  | -1.0774200000 |
| C | -2.8832630000 | 1.2964970000  | -1.0421710000 |
| H | 4.8262040000  | 0.2100050000  | -0.8723790000 |
| C | -4.9135370000 | 3.2725580000  | -0.8307250000 |
| H | 3.0590870000  | -1.5668330000 | -0.7986950000 |
| C | 3.8302390000  | 0.4307500000  | -0.5056010000 |
| C | 2.8483370000  | -0.5516340000 | -0.4795110000 |
| H | -5.6854550000 | 3.9532510000  | -0.4779970000 |
| H | 3.5682980000  | 4.4446550000  | -0.2615980000 |
| O | 2.0098390000  | -3.4996840000 | -0.2346430000 |
| O | 4.5801290000  | 2.6198010000  | -0.1234630000 |
| C | 3.5479390000  | 1.7265420000  | -0.0552450000 |
| H | -1.6936740000 | -4.2992390000 | -0.0087340000 |
| C | 1.5743210000  | -0.2436870000 | -0.0074850000 |
| I | 0.0459500000  | -1.8727070000 | 0.0065850000  |
| O | -2.0500690000 | -3.4047700000 | 0.0558290000  |
| C | -1.5160740000 | -0.3486670000 | 0.0823570000  |
| C | -3.5076470000 | 1.6015000000  | 0.1715110000  |
| H | 5.2947440000  | 4.4841390000  | 0.1779620000  |
| O | -4.4869210000 | 2.5382650000  | 0.3208970000  |
| C | 4.3535870000  | 3.9582260000  | 0.3251790000  |
| C | 2.2713560000  | 2.0281340000  | 0.4254310000  |
| C | 1.2863180000  | 1.0350140000  | 0.4454200000  |
| H | 2.4466660000  | -3.6141500000 | 0.6180570000  |
| H | 2.0246520000  | 3.0174630000  | 0.7855680000  |
| H | 0.3018040000  | 1.2873200000  | 0.8171360000  |
| C | -2.1408350000 | -0.0486710000 | 1.2926180000  |
| C | -3.1324570000 | 0.9221460000  | 1.3381160000  |
| H | 4.0856340000  | 3.9803010000  | 1.3859990000  |
| H | -1.8576940000 | -0.5660020000 | 2.2012430000  |
| H | -3.6266000000 | 1.1698940000  | 2.2700380000  |

**1d-(OH)<sub>2</sub> (B3LYP-D3, CH<sub>2</sub>Cl<sub>2</sub>)**

|                  |   |             |
|------------------|---|-------------|
| $E_0 + E_{ZPE}$  | = | -626.344999 |
| $E_0 + E_{tot}$  | = | -626.327986 |
| $E_0 + H_{corr}$ | = | -626.327042 |
| $E_0 + G_{corr}$ | = | -626.392039 |

Frequency:

|   |               |               |               |
|---|---------------|---------------|---------------|
| H | 2.0403880000  | 3.4387300000  | -1.5308120000 |
| H | -2.6875950000 | -0.5364540000 | -1.4907720000 |
| H | 0.3462560000  | 1.6450500000  | -1.4175530000 |
| H | -4.4556720000 | 1.2102710000  | -1.3889250000 |

|   |               |               |               |
|---|---------------|---------------|---------------|
| C | 2.2329250000  | 2.5556740000  | -0.9311520000 |
| C | 1.2770060000  | 1.5403620000  | -0.8732670000 |
| C | -2.6167940000 | 0.2772520000  | -0.7809310000 |
| C | -3.6143280000 | 1.2510350000  | -0.7056560000 |
| H | 4.1698250000  | 3.2228450000  | -0.2688210000 |
| C | 3.4288560000  | 2.4323860000  | -0.2246590000 |
| C | 1.5251790000  | 0.4073110000  | -0.1040020000 |
| O | -1.9619530000 | -2.7847190000 | -0.0941240000 |
| I | 0.0245080000  | -1.2295980000 | -0.0085620000 |
| O | 2.1793360000  | -2.6257830000 | 0.0456530000  |
| H | 1.8493600000  | -3.5326930000 | 0.0517450000  |
| C | -1.5374900000 | 0.3374190000  | 0.0921120000  |
| C | -3.5316320000 | 2.2684430000  | 0.2448550000  |
| H | -4.3090360000 | 3.0219970000  | 0.3030770000  |
| C | 3.6718770000  | 1.2861610000  | 0.5310750000  |
| C | 2.7212000000  | 0.2648180000  | 0.5901030000  |
| H | -2.4817930000 | -2.6864660000 | 0.7126480000  |
| C | -1.4475400000 | 1.3435130000  | 1.0485910000  |
| H | 4.6046780000  | 1.1799280000  | 1.0744230000  |
| C | -2.4499180000 | 2.3118770000  | 1.1239840000  |
| H | 2.9139160000  | -0.6497130000 | 1.1361910000  |
| H | -0.6009800000 | 1.3855110000  | 1.7240030000  |
| H | -2.3833600000 | 3.0962200000  | 1.8700550000  |

**1d-(OH)<sub>2</sub> (B3LYP-D3, H<sub>2</sub>O)**

|                  |   |             |
|------------------|---|-------------|
| $E_0 + E_{ZPE}$  | = | -626.358748 |
| $E_0 + E_{tot}$  | = | -626.341728 |
| $E_0 + H_{corr}$ | = | -626.340784 |
| $E_0 + G_{corr}$ | = | -626.405315 |

Frequency:

|   |               |               |               |
|---|---------------|---------------|---------------|
| H | -2.2298110000 | -0.1121900000 | -1.9291520000 |
| H | -4.0604280000 | 1.5492090000  | -1.8000080000 |
| H | 1.9063060000  | 3.5899920000  | -1.3075740000 |
| H | 0.2619050000  | 1.7490020000  | -1.2680970000 |
| C | -2.3781120000 | 0.4604800000  | -1.0215820000 |
| C | -3.4102040000 | 1.3978170000  | -0.9458070000 |
| C | 2.1413430000  | 2.6733810000  | -0.7781110000 |
| C | 1.2115730000  | 1.6318550000  | -0.7611270000 |
| H | 1.9426020000  | -3.5025200000 | -0.1429870000 |
| H | 4.0819240000  | 3.3455480000  | -0.1337820000 |
| H | -2.7197070000 | -2.3713100000 | -0.1328970000 |
| C | 3.3631350000  | 2.5341750000  | -0.1209820000 |
| O | 2.2558080000  | -2.5914280000 | -0.0838280000 |
| C | 1.5191920000  | 0.4570830000  | -0.0827390000 |
| I | 0.0684840000  | -1.2141140000 | -0.0289110000 |
| C | -1.5442140000 | 0.2744070000  | 0.0765200000  |
| O | -1.9201580000 | -2.8677070000 | 0.0772440000  |
| C | -3.5993910000 | 2.1377240000  | 0.2206010000  |
| H | -4.4001710000 | 2.8660050000  | 0.2766160000  |
| C | 3.6595280000  | 1.3473250000  | 0.5483330000  |
| C | 2.7376420000  | 0.2987180000  | 0.5673630000  |
| H | 2.9682270000  | -0.6404570000 | 1.0528270000  |
| H | 4.6101470000  | 1.2314370000  | 1.0572780000  |
| C | -1.7261290000 | 1.0041800000  | 1.2471110000  |
| C | -2.7580650000 | 1.9408400000  | 1.3155670000  |
| H | -1.0706450000 | 0.8553590000  | 2.0969370000  |
| H | -2.9030040000 | 2.5131750000  | 2.2248970000  |

**1d-(OH)<sub>2</sub> (M06-2X, Toluene)**

|                  |   |             |
|------------------|---|-------------|
| $E_0 + E_{ZPE}$  | = | -625.962078 |
| $E_0 + E_{tot}$  | = | -625.946024 |
| $E_0 + H_{corr}$ | = | -625.945080 |
| $E_0 + G_{corr}$ | = | -626.006676 |

Coordinates:

|   |               |               |               |
|---|---------------|---------------|---------------|
| H | 2.1816650000  | 3.2288520000  | -1.7242930000 |
| H | 0.4336000000  | 1.4917120000  | -1.5544810000 |
| H | -2.8943600000 | -0.6936830000 | -1.1164020000 |
| H | -4.5819410000 | 1.1432800000  | -1.0491150000 |
| C | 2.3155430000  | 2.3956080000  | -1.0435710000 |
| C | 1.3345270000  | 1.4113990000  | -0.9549090000 |
| H | 2.4242540000  | -2.7732140000 | -0.6641900000 |
| C | -2.6987960000 | 0.2271820000  | -0.5789220000 |
| C | -3.6457020000 | 1.2473440000  | -0.5118250000 |
| H | 4.2272040000  | 3.0724410000  | -0.3290350000 |
| C | 3.4638410000  | 2.3053390000  | -0.2631120000 |
| O | -2.1124210000 | -2.4981430000 | -0.1260360000 |
| C | 1.5030900000  | 0.3356890000  | -0.0908660000 |
| H | -1.8773740000 | -3.4245450000 | -0.0219960000 |
| I | -0.0133180000 | -1.2484810000 | 0.0050970000  |
| C | -1.4963380000 | 0.3624350000  | 0.1039090000  |
| O | 1.9590210000  | -2.6497270000 | 0.1680930000  |
| C | -3.4033120000 | 2.3866610000  | 0.2486780000  |
| H | -4.1447330000 | 3.1760240000  | 0.3015720000  |
| C | 3.6331020000  | 1.2213270000  | 0.5927950000  |
| C | 2.6585630000  | 0.2286140000  | 0.6722850000  |
| C | -1.2576190000 | 1.4891770000  | 0.8827930000  |
| C | -2.2102590000 | 2.5019300000  | 0.9548410000  |
| H | 4.5308410000  | 1.1414640000  | 1.1959840000  |
| H | 2.7980980000  | -0.6523560000 | 1.2877620000  |
| H | -0.3265470000 | 1.5888660000  | 1.4300110000  |
| H | -2.0175170000 | 3.3773900000  | 1.5649760000  |

#### 1d-OR (B3LYP-D3, Toluene)

|                  |   |             |
|------------------|---|-------------|
| $E_0 + E_{ZPE}$  | = | -860.016004 |
| $E_0 + E_{tot}$  | = | -859.995157 |
| $E_0 + H_{corr}$ | = | -859.994213 |
| $E_0 + G_{corr}$ | = | -860.069981 |

Coordinates:

|   |               |               |               |
|---|---------------|---------------|---------------|
| H | -4.3696800000 | 0.3068430000  | -2.0393040000 |
| H | -3.9437610000 | 2.0249960000  | -1.9858980000 |
| O | -1.7544810000 | 0.6240040000  | -1.6502610000 |
| H | 3.3505700000  | 0.6950290000  | -1.5060210000 |
| H | -3.2451780000 | -1.7861320000 | -1.4126100000 |
| C | -4.0742600000 | 1.1258860000  | -1.3787710000 |
| H | -0.6032260000 | 2.6736720000  | -1.2615570000 |
| I | 0.3082980000  | -0.2750250000 | -1.0380090000 |
| C | 3.4717080000  | -0.1498850000 | -0.8373020000 |
| H | 5.6156870000  | -0.0005030000 | -0.7965090000 |
| C | -2.7512170000 | 0.7883380000  | -0.6767270000 |
| H | -4.8757550000 | 1.2988790000  | -0.6532280000 |
| C | 4.7477860000  | -0.5400760000 | -0.4337870000 |
| C | 2.3579420000  | -0.8423120000 | -0.3674520000 |
| C | -3.1248000000 | -1.7013100000 | -0.3382690000 |
| C | -0.0722390000 | 2.6933050000  | -0.3186060000 |
| H | -2.5092180000 | 1.6369850000  | -0.0097140000 |
| H | -3.3741350000 | -3.8064830000 | 0.0148740000  |
| H | -0.3946730000 | 4.7762130000  | 0.0774590000  |
| C | 0.4895780000  | 1.5314090000  | 0.1824220000  |
| C | -2.8833170000 | -0.4405270000 | 0.2205050000  |
| C | 4.9071690000  | -1.6227020000 | 0.4317440000  |
| C | 0.0328900000  | 3.8530210000  | 0.4509750000  |
| C | -3.1848780000 | -2.8368930000 | 0.4634920000  |
| C | 2.5108600000  | -1.9250150000 | 0.4947750000  |
| H | 5.9004480000  | -1.9249240000 | 0.7435620000  |
| H | 1.6422970000  | -2.4612700000 | 0.8615240000  |

|   |               |               |              |
|---|---------------|---------------|--------------|
| C | 3.7907320000  | -2.3158150000 | 0.8943720000 |
| C | 1.1310660000  | 1.4632230000  | 1.4080870000 |
| H | 3.9111270000  | -3.1571520000 | 1.5678280000 |
| C | -2.6987200000 | -0.3482950000 | 1.6009250000 |
| C | 0.6745060000  | 3.8233960000  | 1.6879190000 |
| H | 1.5596710000  | 0.5386370000  | 1.7704320000 |
| C | -2.9993580000 | -2.7324530000 | 1.8444520000 |
| H | -2.4932350000 | 0.6215060000  | 2.0440020000 |
| C | 1.2170120000  | 2.6321500000  | 2.1661750000 |
| H | 0.7477190000  | 4.7270560000  | 2.2816380000 |
| C | -2.7561210000 | -1.4839090000 | 2.4112920000 |
| H | -3.0435090000 | -3.6176560000 | 2.4694600000 |
| H | 1.7092280000  | 2.6020490000  | 3.1313200000 |
| H | -2.6063410000 | -1.3927040000 | 3.4819490000 |

#### 1d-OR (M06-2X, Toluene)

|                  |   |              |
|------------------|---|--------------|
| $E_0 + E_{ZPE}$  | = | -1095.230809 |
| $E_0 + E_{tot}$  | = | -1095.200421 |
| $E_0 + H_{corr}$ | = | -1095.199477 |
| $E_0 + G_{corr}$ | = | -1095.294157 |

Coordinates:

|   |               |               |               |
|---|---------------|---------------|---------------|
| H | -4.0204450000 | 1.5687810000  | -1.7402230000 |
| H | -3.0296480000 | -1.1756850000 | -1.6899640000 |
| H | 3.4354450000  | 0.1254490000  | -1.4934500000 |
| O | -1.5195230000 | 0.8355940000  | -1.4006390000 |
| H | -0.1885440000 | 2.6786880000  | -1.3028400000 |
| H | -3.0384480000 | 2.9702590000  | -1.2690670000 |
| C | -3.5026400000 | 2.0502190000  | -0.9070890000 |
| I | 0.3295340000  | -0.3339050000 | -0.8585540000 |
| H | 5.5876790000  | -0.8928330000 | -0.8328980000 |
| H | -4.1349230000 | -3.2249180000 | -0.8110490000 |
| C | 3.4506690000  | -0.6932290000 | -0.7812030000 |
| C | -3.3239640000 | -1.2427780000 | -0.6481510000 |
| C | 0.4458680000  | 2.6947430000  | -0.4257310000 |
| C | 4.6626140000  | -1.2632530000 | -0.4066300000 |
| C | -2.4203130000 | 1.1054720000  | -0.3767110000 |
| C | 2.2627580000  | -1.1655530000 | -0.2311470000 |
| H | 0.4889090000  | 4.8255920000  | -0.2241360000 |
| C | -3.9378290000 | -2.3873790000 | -0.1511580000 |
| H | -4.2329960000 | 2.2966910000  | -0.1317580000 |
| C | 0.8803320000  | 1.5056740000  | 0.1339340000  |
| C | -3.0634550000 | -0.1565270000 | 0.1876080000  |
| C | 0.8135030000  | 3.8829730000  | 0.1999310000  |
| H | -1.9205480000 | 1.6135960000  | 0.4712180000  |
| C | 4.6865590000  | -2.3089540000 | 0.5126990000  |
| C | 2.2846110000  | -2.2111110000 | 0.6847480000  |
| H | 5.6313070000  | -2.7525590000 | 0.8036030000  |
| C | 3.4992530000  | -2.7845970000 | 1.0567190000  |
| H | 1.3596410000  | -2.5814940000 | 1.1150850000  |
| C | -4.3003080000 | -2.4617930000 | 1.1913720000  |
| C | 1.6480170000  | 1.4498580000  | 1.2837480000  |
| C | 1.5839670000  | 3.8624930000  | 1.3578080000  |
| C | -3.4299940000 | -0.2397020000 | 1.5295740000  |
| H | -4.7750930000 | -3.3550620000 | 1.5799550000  |
| H | 1.9758560000  | 0.5049270000  | 1.6979930000  |
| H | 3.5148440000  | -3.5985740000 | 1.7719920000  |
| H | 1.8613060000  | 4.7916790000  | 1.8403790000  |
| C | 1.9948660000  | 2.6502070000  | 1.8996560000  |
| C | -4.0456100000 | -1.3826800000 | 2.0315830000  |
| H | -3.2242460000 | 0.5987140000  | 2.1890900000  |
| H | 2.5876800000  | 2.6281050000  | 2.8060130000  |
| H | -4.3203130000 | -1.4336500000 | 3.0791780000  |

**1e-OR (B3LYP-D3, Toluene)**

$E_0 + E_{ZPE}$  = -1095.838917  
 $E_0 + E_{tot}$  = -1095.808531  
 $E_0 + H_{corr}$  = -1095.807586  
 $E_0 + G_{corr}$  = -1095.900957

Coordinates:

|   |               |               |               |
|---|---------------|---------------|---------------|
| H | 2.0841440000  | 0.9007790000  | -3.0277020000 |
| H | 0.3908150000  | 0.3951700000  | -3.0041790000 |
| H | -1.8925860000 | 0.5302170000  | -2.7912520000 |
| H | -2.7961700000 | 2.0451250000  | -2.7364090000 |
| C | 1.3258490000  | 0.3860330000  | -2.4375120000 |
| H | 1.6294810000  | -0.6528660000 | -2.2937090000 |
| C | -2.2477540000 | 1.3238080000  | -2.1291280000 |
| H | 5.5557180000  | 0.2302730000  | -1.8647990000 |
| H | -1.3688430000 | 1.8266310000  | -1.7194640000 |
| H | 3.8480010000  | -1.5572340000 | -1.6299150000 |
| H | 2.5361930000  | 2.6157350000  | -1.5837630000 |
| H | -4.6899740000 | 2.1703740000  | -1.4519680000 |
| C | 1.1591910000  | 1.0584270000  | -1.1015600000 |
| C | -3.1242470000 | 0.7673130000  | -1.0347290000 |
| C | 4.9933060000  | 0.1334190000  | -0.9417970000 |
| C | -4.3850370000 | 1.3368660000  | -0.8260190000 |
| C | 1.8712700000  | 2.2262220000  | -0.8207080000 |
| C | 4.0435180000  | -0.8748970000 | -0.8108550000 |
| O | 1.4390360000  | -2.2134470000 | -0.6326970000 |
| I | -0.7297540000 | -1.3019330000 | -0.4603630000 |
| H | -7.3555300000 | 1.0050690000  | -0.3265380000 |
| C | -2.7361520000 | -0.3000510000 | -0.2132460000 |
| H | 2.6550900000  | 4.7680410000  | -0.1786810000 |
| H | 3.5722360000  | -3.7340660000 | -0.1609940000 |
| C | 0.3348640000  | 0.5757010000  | -0.0788470000 |
| H | 5.9602820000  | 1.8114570000  | 0.0093460000  |
| H | -6.6154260000 | 2.5494130000  | 0.0943500000  |
| C | 5.2230800000  | 1.0222540000  | 0.1107510000  |
| C | -5.2587710000 | 0.8675330000  | 0.1531900000  |
| C | -6.6245690000 | 1.4836700000  | 0.3340150000  |
| C | 3.3023570000  | -1.0149930000 | 0.3673680000  |
| C | 1.7816720000  | 2.8805960000  | 0.4064740000  |
| C | 2.2666490000  | -2.1334860000 | 0.4894040000  |
| C | 2.6255540000  | 4.0979840000  | 0.6840500000  |
| C | 2.9679350000  | -3.4848750000 | 0.7155830000  |
| C | -3.5981050000 | -0.8166220000 | 0.7672680000  |
| H | 2.2173260000  | -4.2682660000 | 0.8498930000  |
| H | 3.6554750000  | 3.7945150000  | 0.8988070000  |
| C | -4.8493270000 | -0.2132910000 | 0.9326370000  |
| H | -3.0578140000 | -2.8988240000 | 1.0588200000  |
| C | 0.2052280000  | 1.1755520000  | 1.1741030000  |
| C | 4.4933470000  | 0.8899860000  | 1.2894810000  |
| H | -6.9829060000 | 1.3666190000  | 1.3591470000  |
| C | 0.9451630000  | 2.3460580000  | 1.3819250000  |
| H | 1.6821770000  | -1.9157650000 | 1.4068230000  |
| C | 3.5412890000  | -0.1218520000 | 1.4123380000  |
| H | 2.2537670000  | 4.6596740000  | 1.5431850000  |
| H | 3.6219990000  | -3.4590980000 | 1.5936550000  |
| C | -3.2413870000 | -1.9948850000 | 1.6465940000  |
| H | -5.5188960000 | -0.6019810000 | 1.6941470000  |
| H | -1.7013090000 | 0.6491450000  | 2.0420590000  |
| H | 4.6554400000  | 1.5815860000  | 2.1096350000  |
| H | -2.3413710000 | -1.8056370000 | 2.2367830000  |
| C | -0.6395020000 | 0.6298820000  | 2.2953860000  |
| H | 2.9606360000  | -0.2056620000 | 2.3257760000  |

|   |               |               |              |
|---|---------------|---------------|--------------|
| H | -4.0542830000 | -2.2149070000 | 2.3399470000 |
| H | 0.8733410000  | 2.8333490000  | 2.3488290000 |
| H | -0.3696980000 | -0.4052520000 | 2.5203110000 |
| H | -0.4951820000 | 1.2183180000  | 3.2016950000 |

**1e-OR (M06-2X, Toluene)**

$E_0 + E_{ZPE}$  = -1095.200421  
 $E_0 + E_{tot}$  = -1095.200421  
 $E_0 + H_{corr}$  = -1095.199477  
 $E_0 + G_{corr}$  = -1095.294157

Coordinates:

|   |               |               |               |
|---|---------------|---------------|---------------|
| H | -3.3685910000 | 1.0921120000  | -2.9323580000 |
| H | 0.2206970000  | 0.7676780000  | -2.8724340000 |
| H | 1.5251720000  | 1.9586750000  | -2.8585190000 |
| H | -1.9196060000 | 0.0973340000  | -2.7773970000 |
| C | 1.0193820000  | 1.1996290000  | -2.2633250000 |
| C | -2.6297080000 | 0.7165660000  | -2.2247650000 |
| H | 1.7168330000  | 0.3963990000  | -2.0133710000 |
| H | -2.0840220000 | 1.5721920000  | -1.8195800000 |
| H | -5.2474090000 | 0.5965690000  | -1.7329790000 |
| H | 1.1046420000  | 3.7758560000  | -1.5636440000 |
| H | 6.1155310000  | -3.0671800000 | -1.2371580000 |
| C | -3.3036690000 | -0.0775510000 | -1.1358640000 |
| C | -4.6959100000 | -0.0276420000 | -1.0360040000 |
| C | 0.4641850000  | 1.8157800000  | -1.0086680000 |
| H | 3.7273970000  | -2.4463000000 | -0.8475490000 |
| C | 0.5995730000  | 3.1914120000  | -0.8015080000 |
| C | 5.8685270000  | -2.1430680000 | -0.7262530000 |
| H | -7.3334960000 | -1.5292360000 | -0.5914390000 |
| C | 4.5342220000  | -1.8080540000 | -0.5087340000 |
| H | 7.9228010000  | -1.5546100000 | -0.4712990000 |
| H | -7.2823370000 | 0.2261300000  | -0.4182000000 |
| O | 1.8978350000  | -1.0290130000 | -0.3721280000 |
| H | 0.7752270000  | 5.7694790000  | -0.3158500000 |
| C | 6.8846380000  | -1.2958070000 | -0.2980330000 |
| I | -0.4004440000 | -1.0287220000 | -0.2865220000 |
| C | -2.6001780000 | -0.8745610000 | -0.2271490000 |
| C | -5.3939550000 | -0.7572620000 | -0.0807610000 |
| C | -6.8979350000 | -0.7103780000 | -0.0122190000 |
| C | -0.1908590000 | 1.0968390000  | -0.0075740000 |
| C | 4.1999640000  | -0.6248010000 | 0.1443610000  |
| H | 2.6392330000  | 0.8100730000  | 0.1968210000  |
| C | 0.1174280000  | 3.8237100000  | 0.3381540000  |
| C | 6.5581510000  | -0.1064430000 | 0.3493770000  |
| C | 2.7411200000  | -0.2721750000 | 0.4191690000  |
| C | 0.2771660000  | 5.3078420000  | 0.5366100000  |
| C | 5.2256450000  | 0.2231940000  | 0.5667550000  |
| H | -0.6961210000 | 5.7865990000  | 0.6659950000  |
| H | 7.3429560000  | 0.5646450000  | 0.6801380000  |
| C | -3.2752310000 | -1.6444100000 | 0.7307560000  |
| C | -4.6661930000 | -1.5670740000 | 0.7869170000  |
| H | -7.2477340000 | -0.8107880000 | 1.0163660000  |
| H | 4.9744300000  | 1.1547490000  | 1.0666830000  |
| C | -0.6823430000 | 1.6717900000  | 1.1675770000  |
| H | -2.0093350000 | -3.3441340000 | 1.1813820000  |
| C | -0.5132590000 | 3.0489550000  | 1.3078470000  |
| H | 0.8678990000  | 5.5160900000  | 1.4315970000  |
| H | -5.1943150000 | -2.1550490000 | 1.5318460000  |
| C | -2.5613990000 | -2.5562790000 | 1.7001670000  |
| C | 2.4500860000  | -0.4527850000 | 1.9186500000  |
| H | -2.3493030000 | 0.5539890000  | 1.9538100000  |
| H | 1.4435340000  | -0.0956880000 | 2.1546090000  |

|   |               |               |              |
|---|---------------|---------------|--------------|
| H | 2.5168710000  | -1.5146510000 | 2.1715340000 |
| H | -0.8843540000 | 3.5241530000  | 2.2106970000 |
| C | -1.3633350000 | 0.9033950000  | 2.2682420000 |
| H | -1.8458970000 | -2.0104220000 | 2.3196140000 |
| H | -3.2798890000 | -3.0382730000 | 2.3627030000 |
| H | 3.1577030000  | 0.1026800000  | 2.5389860000 |
| H | -0.7774270000 | 0.0306720000  | 2.5657230000 |
| H | -1.4869310000 | 1.5397000000  | 3.1435930000 |

**1d-(OR)<sub>2</sub> (B3LYP-D3, Toluene)**

|                  |   |              |
|------------------|---|--------------|
| $E_0 + E_{ZPE}$  | = | -1245.567999 |
| $E_0 + E_{tot}$  | = | -1245.537736 |
| $E_0 + H_{corr}$ | = | -1245.536791 |
| $E_0 + G_{corr}$ | = | -1245.633072 |

Coordinates:

|   |               |               |               |
|---|---------------|---------------|---------------|
| H | 1.6661620000  | -1.2595960000 | -2.3727250000 |
| H | 1.9949200000  | -3.0101900000 | -2.3684560000 |
| H | -5.1886600000 | 2.4539730000  | -2.0242350000 |
| H | -2.7952380000 | 1.7455500000  | -1.9215830000 |
| H | 0.3881660000  | -2.4034220000 | -1.9172970000 |
| C | 1.4614360000  | -2.2021380000 | -1.8555020000 |
| C | -4.8558360000 | 1.7747910000  | -1.2460700000 |
| C | -3.5229810000 | 1.3616310000  | -1.2163770000 |
| O | -0.5750950000 | 2.1708630000  | -1.1265030000 |
| H | -3.1888250000 | -2.2462240000 | -1.0828410000 |
| H | -0.6044620000 | 4.2100090000  | -1.0813330000 |
| H | 3.3658820000  | 0.1640320000  | -0.5900570000 |
| H | 5.8386550000  | 0.4310280000  | -0.5794190000 |
| H | -3.8082870000 | -4.5729760000 | -0.5138540000 |
| C | 4.0129700000  | -0.6955740000 | -0.4719210000 |
| C | 5.3979400000  | -0.5536580000 | -0.4574890000 |
| C | -0.3860750000 | 3.3417900000  | -0.4217290000 |
| C | 1.8927840000  | -2.0802310000 | -0.3732050000 |
| C | 3.4179680000  | -1.9521830000 | -0.3179450000 |
| C | -2.6471530000 | -2.7745890000 | -0.3067880000 |
| H | -6.7878850000 | 1.6540010000  | -0.2995010000 |
| C | 6.2184540000  | -1.6704440000 | -0.2814390000 |
| C | -5.7536980000 | 1.3272430000  | -0.2769300000 |
| H | 7.2978570000  | -1.5603180000 | -0.2627840000 |
| C | -3.0982670000 | 0.4898100000  | -0.2198690000 |
| I | -0.9489770000 | -0.0940390000 | -0.1764080000 |
| C | 4.2473070000  | -3.0624540000 | -0.1415450000 |
| C | 5.6368590000  | -2.9270900000 | -0.1221400000 |
| H | 3.7989610000  | -4.0438170000 | -0.0109930000 |
| C | -2.9994950000 | -4.0849190000 | 0.0202020000  |
| H | 6.2641270000  | -3.8012300000 | 0.0240350000  |
| H | 0.8984850000  | 5.7043910000  | 0.0485300000  |
| C | 1.0519810000  | 3.5601670000  | 0.0781970000  |
| H | 1.6430880000  | -3.0555500000 | 0.1021960000  |
| H | 1.5568650000  | 1.4693010000  | 0.2072620000  |
| O | 1.2840850000  | -1.0285450000 | 0.2832050000  |
| C | 1.5371820000  | 4.8571080000  | 0.2861280000  |
| C | -1.6080750000 | -2.1479580000 | 0.3749430000  |
| C | 1.8939970000  | 2.4844910000  | 0.3771150000  |
| H | -2.3793400000 | 3.3743540000  | 0.4511810000  |
| C | -5.3148180000 | 0.4654880000  | 0.7270310000  |
| C | -3.9842400000 | 0.0440130000  | 0.7556990000  |
| C | 2.8196990000  | 5.0814840000  | 0.7840080000  |
| C | -1.3457210000 | 3.4795430000  | 0.7895870000  |
| C | 3.1755720000  | 2.7033840000  | 0.8847850000  |
| H | 3.1751230000  | 6.0973980000  | 0.9287160000  |
| C | -2.3129280000 | -4.7631240000 | 1.0265580000  |

|   |               |               |              |
|---|---------------|---------------|--------------|
| C | 3.6463140000  | 4.0001220000  | 1.0901280000 |
| H | 3.8052770000  | 1.8512860000  | 1.1185390000 |
| H | -2.5863990000 | -5.7817590000 | 1.2801600000 |
| H | -1.2302990000 | 4.4453240000  | 1.2939180000 |
| C | -0.9080910000 | -2.8222080000 | 1.3700270000 |
| H | 4.6459510000  | 4.1664270000  | 1.4786960000 |
| H | -6.0034460000 | 0.1213730000  | 1.4918380000 |
| H | -1.1411210000 | 2.6891280000  | 1.5184500000 |
| H | -3.6482520000 | -0.6311280000 | 1.5337360000 |
| C | -1.2672450000 | -4.1305740000 | 1.6981680000 |
| H | -0.0664000000 | -2.3334580000 | 1.8466190000 |
| H | -0.7220930000 | -4.6559240000 | 2.4754530000 |

**1d-(OR)<sub>2</sub> (M06-2X, Toluene)**

|                  |   |              |
|------------------|---|--------------|
| $E_0 + E_{ZPE}$  | = | -1244.917269 |
| $E_0 + E_{tot}$  | = | -1244.887307 |
| $E_0 + H_{corr}$ | = | -1244.886363 |
| $E_0 + G_{corr}$ | = | -1244.982335 |

Coordinates:

|   |               |               |               |
|---|---------------|---------------|---------------|
| H | 0.5716830000  | -4.5104340000 | -2.6730490000 |
| H | -0.0545400000 | -2.2118460000 | -1.9338080000 |
| C | 1.1144420000  | -4.0342500000 | -1.8640510000 |
| H | -4.1945830000 | 4.3728120000  | -1.7939920000 |
| H | 3.4521060000  | -0.5192870000 | -1.6115130000 |
| H | 2.4015680000  | -5.7230530000 | -1.5202830000 |
| H | 5.8379420000  | 0.1164180000  | -1.5135550000 |
| C | 0.7718080000  | -2.7414730000 | -1.4723060000 |
| H | 1.4944690000  | 2.6401400000  | -1.3180430000 |
| C | -3.2459590000 | 4.1525070000  | -1.3172690000 |
| H | -3.5772730000 | 2.0262750000  | -1.2505660000 |
| H | -2.6224550000 | 6.2106860000  | -1.2236360000 |
| C | 2.1409410000  | -4.7154040000 | -1.2173610000 |
| H | 1.6136060000  | 4.3879570000  | -1.0457780000 |
| C | -2.9000440000 | 2.8400880000  | -1.0112970000 |
| C | -2.3621950000 | 5.1812900000  | -0.9998210000 |
| C | 3.8350590000  | 0.0135680000  | -0.7474940000 |
| C | 5.1805740000  | 0.3670280000  | -0.6887100000 |
| C | 1.6529350000  | 3.4103100000  | -0.5556230000 |
| H | -1.8963080000 | -2.9526610000 | -0.5140780000 |
| C | 1.4710000000  | -2.1292330000 | -0.4397360000 |
| C | -1.6835790000 | 2.5535380000  | -0.3939930000 |
| C | -1.1472800000 | 4.8887200000  | -0.3903620000 |
| O | -1.3447280000 | -0.9751400000 | -0.3345860000 |
| C | 2.8272400000  | -4.1019290000 | -0.1738190000 |
| H | -1.4400800000 | 1.5249270000  | -0.1506840000 |
| H | -0.4632150000 | 5.6961320000  | -0.1405940000 |
| H | 2.6468850000  | 3.2659070000  | -0.1241710000 |
| C | -0.7862520000 | 3.5742410000  | -0.0818860000 |
| H | -4.0841210000 | -3.8760220000 | 0.1168820000  |
| C | -2.0063580000 | -2.0703160000 | 0.1561060000  |
| I | 0.8683260000  | -0.1335900000 | 0.2039740000  |
| C | 2.4936560000  | -2.8076220000 | 0.2146770000  |
| C | -4.4362240000 | -2.8567840000 | 0.2540400000  |
| C | -3.5093950000 | -1.8144880000 | 0.2736120000  |
| C | 2.9879800000  | 0.3423750000  | 0.3036500000  |
| H | 3.6219770000  | -4.6294430000 | 0.3417820000  |
| H | -6.5052310000 | -3.4292320000 | 0.3743430000  |
| C | -5.7978580000 | -2.6071280000 | 0.3992140000  |
| C | 5.6759250000  | 1.0403170000  | 0.4233030000  |
| C | -3.9745220000 | -0.5114190000 | 0.4417330000  |
| H | -3.2421190000 | 0.2871990000  | 0.4491210000  |
| H | 6.7240200000  | 1.3132960000  | 0.4701390000  |

|   |               |               |              |   |               |               |               |
|---|---------------|---------------|--------------|---|---------------|---------------|---------------|
| C | 0.5795020000  | 3.2755230000  | 0.5486300000 | H | -7.3338650000 | 1.5614740000  | -0.1451260000 |
| C | -6.2524320000 | -1.3019380000 | 0.5681930000 | H | -2.8107340000 | 3.2105040000  | -0.0153730000 |
| C | -5.3342070000 | -0.2552180000 | 0.5902270000 | H | 2.5191230000  | -2.1742630000 | 0.0690780000  |
| H | -7.3126150000 | -1.1029610000 | 0.6782180000 | C | -1.1090500000 | -4.3308130000 | 0.0902720000  |
| H | -5.6781590000 | 0.7655770000  | 0.7208200000 | C | 0.5662520000  | 3.9563660000  | 0.2439580000  |
| H | 3.0349070000  | -2.3306640000 | 1.0251840000 | C | 1.6690220000  | 3.0986170000  | 0.2761820000  |
| O | 0.6417320000  | 2.0734790000  | 1.2047290000 | C | -0.5508020000 | -2.0094170000 | 0.3816750000  |
| H | 0.7615460000  | 4.1085590000  | 1.2594470000 | C | -1.8912110000 | 3.4675630000  | 0.5165410000  |
| C | 3.4716680000  | 1.0287250000  | 1.4092050000 | H | -7.4639910000 | -0.0045730000 | 0.6586660000  |
| H | -0.4318130000 | -2.7912590000 | 1.4705330000 | H | -0.1744890000 | 5.8725160000  | 0.8908480000  |
| C | 4.8207430000  | 1.3695420000  | 1.4707860000 | C | 0.6630730000  | 5.1805630000  | 0.9213760000  |
| C | -1.4874600000 | -2.5127820000 | 1.5407410000 | C | -4.8069490000 | 0.1372860000  | 0.9363110000  |
| H | -2.0473310000 | -3.3681060000 | 1.9312000000 | C | -3.4094880000 | 0.0457200000  | 0.9395280000  |
| H | 2.7781590000  | 1.3319030000  | 2.1845090000 | H | -0.4981550000 | -6.8012290000 | 0.9737500000  |
| H | -1.5846330000 | -1.6782860000 | 2.2419060000 | C | 2.8169590000  | 3.4390890000  | 0.9956740000  |
| H | 5.2000040000  | 1.9022800000  | 2.3355790000 | H | 3.6492390000  | 2.7432580000  | 1.0221020000  |

**1e-(OR)<sub>2</sub> (B3LYP-D3, Toluene)**

|                  |   |              |
|------------------|---|--------------|
| $E_0 + E_{ZPE}$  | = | -1481.389611 |
| $E_0 + E_{tot}$  | = | -1481.349771 |
| $E_0 + H_{corr}$ | = | -1481.348826 |
| $E_0 + G_{corr}$ | = | -1481.465065 |

Coordinates:

|   |               |               |               |
|---|---------------|---------------|---------------|
| H | -3.4408720000 | 0.9208120000  | -3.5723600000 |
| H | -2.1209230000 | -0.1512170000 | -3.0847140000 |
| C | -2.7186590000 | 0.7122950000  | -2.7799820000 |
| H | 2.3845440000  | -1.0351510000 | -2.7651500000 |
| H | -2.0321840000 | 1.5591470000  | -2.6668680000 |
| H | -1.1603290000 | -2.2192850000 | -2.3925380000 |
| H | 2.8408580000  | -2.7067760000 | -2.3476510000 |
| H | -5.3603480000 | 0.7495370000  | -2.3365820000 |
| H | -2.1355210000 | -3.6781010000 | -2.1845880000 |
| C | 2.2550550000  | -1.8362680000 | -2.0316540000 |
| H | 1.2004360000  | -2.1215580000 | -2.0102590000 |
| C | -1.8301090000 | -2.7451580000 | -1.7072640000 |
| H | -2.7156710000 | -2.1195400000 | -1.5779970000 |
| C | -3.4218200000 | 0.4656150000  | -1.4693170000 |
| C | -4.8174530000 | 0.5451600000  | -1.4177200000 |
| O | -0.6227010000 | 2.4520620000  | -1.2919710000 |
| H | -0.9629220000 | 4.4583500000  | -1.1397570000 |
| H | -7.4840730000 | 0.0927440000  | -1.1086290000 |
| H | 6.3850360000  | 1.5503660000  | -0.6975580000 |
| C | 6.0341030000  | 0.5230800000  | -0.6743750000 |
| H | 8.0186350000  | -0.3238490000 | -0.6652460000 |
| C | 6.9525390000  | -0.5266340000 | -0.6572820000 |
| C | 4.6643340000  | 0.2611490000  | -0.6568290000 |
| H | 3.9335080000  | 1.0600510000  | -0.6554340000 |
| C | 2.6751870000  | -1.3213360000 | -0.6323440000 |
| C | 4.1868920000  | -1.0514670000 | -0.6287310000 |
| C | 6.4868150000  | -1.8419670000 | -0.6226270000 |
| C | 5.1163200000  | -2.0971950000 | -0.6088700000 |
| H | 7.1921250000  | -2.6672930000 | -0.6014190000 |
| H | 4.7591950000  | -3.1231690000 | -0.5747460000 |
| C | -0.7263070000 | 3.5749270000  | -0.5039630000 |
| H | -1.5719400000 | -5.1161870000 | -0.5010010000 |
| C | -1.1538270000 | -3.0154070000 | -0.3858020000 |
| I | -0.5028020000 | 0.1026010000  | -0.3517140000 |
| C | -2.7312880000 | 0.1950410000  | -0.2765970000 |
| H | 1.6396180000  | 2.1596480000  | -0.2602990000 |
| O | 1.9672240000  | -0.2096260000 | -0.2460440000 |
| C | -5.5286800000 | 0.3807470000  | -0.2293900000 |
| C | -7.0332290000 | 0.5095280000  | -0.2039890000 |

**1e-(OR)<sub>2</sub> (M06-2X, Toluene)**

|                  |   |              |
|------------------|---|--------------|
| $E_0 + E_{ZPE}$  | = | -1480.596517 |
| $E_0 + E_{tot}$  | = | -1480.557083 |
| $E_0 + H_{corr}$ | = | -1480.556139 |
| $E_0 + G_{corr}$ | = | -1480.670346 |

Coordinates:

|   |               |               |               |
|---|---------------|---------------|---------------|
| H | -3.3521070000 | 0.7623030000  | -3.6249630000 |
| H | -2.0366310000 | -0.2957430000 | -3.0959540000 |
| C | -2.6321530000 | 0.5803060000  | -2.8258810000 |
| H | -1.9495150000 | 1.4312710000  | -2.7316340000 |
| H | 2.3214960000  | -1.1793140000 | -2.6929760000 |
| H | -5.2743750000 | 0.6283280000  | -2.4077780000 |
| H | -1.0641920000 | -2.2381870000 | -2.3637840000 |
| H | 2.9016850000  | -2.7886000000 | -2.1887700000 |
| H | -1.9982620000 | -3.7224950000 | -2.1455180000 |
| C | 2.2696940000  | -1.9403450000 | -1.9081390000 |
| H | 1.2375230000  | -2.2928890000 | -1.8280920000 |
| C | -1.7380900000 | -2.7685500000 | -1.6857370000 |
| H | -2.6482970000 | -2.1714620000 | -1.5917090000 |
| C | -3.3458180000 | 0.3754860000  | -1.5159190000 |
| C | -4.7383340000 | 0.4489200000  | -1.4797140000 |
| O | -0.7021350000 | 2.3905470000  | -1.2929850000 |
| H | -1.0519860000 | 4.3970600000  | -1.1518940000 |

|   |               |               |               |
|---|---------------|---------------|---------------|
| H | -7.3992260000 | -0.0839390000 | -1.1463100000 |
| H | 6.2450710000  | 1.7308220000  | -0.8677830000 |
| H | 7.9673530000  | -0.0547020000 | -0.8266580000 |
| C | 5.9465380000  | 0.6900180000  | -0.7967670000 |
| C | 6.9145610000  | -0.3094200000 | -0.7751580000 |
| H | 3.8208770000  | 1.1204830000  | -0.7275310000 |
| C | 4.5952770000  | 0.3617300000  | -0.7234660000 |
| C | 6.5193600000  | -1.6418390000 | -0.6809480000 |
| H | 7.2659460000  | -2.4286320000 | -0.6554680000 |
| C | 4.1894390000  | -0.9679560000 | -0.6325490000 |
| C | 5.1678540000  | -1.9638410000 | -0.6115350000 |
| C | 2.6961500000  | -1.3033910000 | -0.5686310000 |
| H | 4.8644510000  | -3.0044050000 | -0.5284330000 |
| C | -0.8309740000 | 3.5110040000  | -0.5183340000 |
| H | -1.4904860000 | -5.0946590000 | -0.4051190000 |
| I | -0.4789780000 | 0.0941950000  | -0.3673250000 |
| C | -1.0858410000 | -2.9923520000 | -0.3457620000 |
| H | -7.2637630000 | 1.4771350000  | -0.3385810000 |
| C | -2.6627170000 | 0.1414530000  | -0.3135690000 |
| C | -5.4568900000 | 0.3090020000  | -0.2950490000 |
| H | 1.5564580000  | 2.1322830000  | -0.2899950000 |
| C | -6.9596540000 | 0.4277990000  | -0.2877490000 |
| O | 1.9505750000  | -0.2021770000 | -0.2586430000 |
| H | -2.9136750000 | 3.1186860000  | -0.0800680000 |
| C | -1.0382050000 | -4.2886920000 | 0.1666740000  |
| H | 2.6005730000  | -2.1028970000 | 0.2034540000  |
| C | 0.4360380000  | 3.8861910000  | 0.2657750000  |
| C | 1.5519230000  | 3.0493620000  | 0.2881380000  |
| C | -0.5000070000 | -1.9578340000 | 0.3955790000  |
| C | -2.0111030000 | 3.3923580000  | 0.4735330000  |
| H | -7.3842440000 | 0.0003820000  | 0.6218570000  |
| C | -4.7466710000 | 0.0954430000  | 0.8792540000  |
| C | -3.3512310000 | 0.0119120000  | 0.8951390000  |
| H | -0.3581640000 | 5.7572260000  | 0.9671840000  |
| C | 0.4924510000  | 5.0812390000  | 0.9918660000  |
| H | -2.1943560000 | 4.3183860000  | 1.0266000000  |
| C | 2.6734800000  | 3.3809180000  | 1.0490250000  |
| H | 3.5189690000  | 2.7008660000  | 1.0686470000  |
| H | -0.0073430000 | -6.6826600000 | 1.1631640000  |
| H | -1.8040360000 | 2.5976750000  | 1.1976810000  |
| C | -0.4210950000 | -4.5783970000 | 1.3804540000  |
| C | 0.1525560000  | -2.2168420000 | 1.6069100000  |
| C | 1.6141920000  | 5.4227980000  | 1.7380790000  |
| H | 1.5640180000  | -0.6148680000 | 1.7745740000  |
| C | 2.7113400000  | 4.5647070000  | 1.7771270000  |
| H | -5.2864510000 | -0.0026590000 | 1.8169750000  |
| C | -0.3983690000 | -5.9891350000 | 1.9112480000  |
| C | 0.1727270000  | -3.5337670000 | 2.0774960000  |
| H | -1.4060300000 | -6.3221400000 | 2.1737430000  |
| C | -2.6574270000 | -0.1809550000 | 2.2183920000  |
| H | -2.1960740000 | -1.1694030000 | 2.2884270000  |
| H | 1.6330550000  | 6.3554600000  | 2.2922300000  |
| H | -1.8674770000 | 0.5614940000  | 2.3551950000  |
| H | 3.5854990000  | 4.8209270000  | 2.3657120000  |
| C | 0.8450950000  | -1.1455310000 | 2.4084310000  |
| H | 0.1296680000  | -0.4068490000 | 2.7805990000  |
| H | 0.2249380000  | -6.0629370000 | 2.8033730000  |
| H | 0.6782980000  | -3.7407190000 | 3.0162970000  |
| H | -3.3685850000 | -0.0746530000 | 3.0380760000  |
| H | 1.3531440000  | -1.5860310000 | 3.2672060000  |

### 1a-(OH)OH (B3LYP-D3, CH<sub>2</sub>Cl<sub>2</sub>)

|                  |   |             |
|------------------|---|-------------|
| $E_0 + E_{ZPE}$  | = | -830.907560 |
| $E_0 + E_{tot}$  | = | -830.888177 |
| $E_0 + H_{corr}$ | = | -830.887232 |
| $E_0 + G_{corr}$ | = | -830.958021 |

Coordinates:

|   |               |               |               |
|---|---------------|---------------|---------------|
| H | 3.4324570000  | 2.6097400000  | -2.7468260000 |
| H | 2.5284130000  | 0.3306340000  | -2.4034640000 |
| H | -3.3659170000 | -0.5912870000 | -2.0772830000 |
| H | -1.0656110000 | -1.5442360000 | -1.9840510000 |
| C | 3.0833040000  | 2.3106470000  | -1.7645940000 |
| C | 2.5747150000  | 1.0249890000  | -1.5718540000 |
| C | -2.7191550000 | -0.3957160000 | -1.2341630000 |
| O | -5.2226340000 | 0.6776020000  | -1.2003380000 |
| C | -1.4337510000 | -0.9193710000 | -1.1831260000 |
| H | 3.5286890000  | 4.2044230000  | -0.8464290000 |
| C | 3.1356490000  | 3.2049730000  | -0.6957900000 |
| C | 2.1266700000  | 0.6538870000  | -0.3065020000 |
| N | -4.5244090000 | 0.9485700000  | -0.2264820000 |
| C | -3.1610180000 | 0.3915460000  | -0.1712720000 |
| C | -0.6496860000 | -0.6240820000 | -0.0738340000 |
| I | 1.3678670000  | -1.4187360000 | -0.0207040000 |
| O | 0.2178490000  | -3.5224200000 | 0.0815860000  |
| C | 2.6819820000  | 2.8156020000  | 0.5644240000  |
| O | -4.8997340000 | 1.6578840000  | 0.7021420000  |
| C | 2.1739120000  | 1.5305070000  | 0.7741470000  |
| H | -0.2310240000 | -3.5996190000 | 0.9325160000  |
| C | -2.3648530000 | 0.6654780000  | 0.9368720000  |
| C | -1.0705880000 | 0.1473310000  | 0.9970030000  |
| H | 2.7207220000  | 3.5129100000  | 1.3944780000  |
| H | -2.7476420000 | 1.2709000000  | 1.7468840000  |
| H | 1.8017030000  | 1.2288850000  | 1.7561160000  |
| H | -0.4316690000 | 0.3354690000  | 1.8836000000  |
| O | 0.6639200000  | 0.6703820000  | 3.3289900000  |
| H | 0.6654740000  | 0.0928720000  | 4.1002400000  |

### 1a-(OH)OH (B3LYP-D3, H<sub>2</sub>O)

|                  |   |             |
|------------------|---|-------------|
| $E_0 + E_{ZPE}$  | = | -830.920679 |
| $E_0 + E_{tot}$  | = | -830.900839 |
| $E_0 + H_{corr}$ | = | -830.899895 |
| $E_0 + G_{corr}$ | = | -830.972110 |

Coordinates:

|   |               |               |               |
|---|---------------|---------------|---------------|
| H | 3.4045580000  | 2.6582070000  | -2.7248750000 |
| H | 2.5172030000  | 0.3681600000  | -2.4148030000 |
| H | -3.3311830000 | -0.5112400000 | -2.1264090000 |
| H | -1.0287570000 | -1.4527620000 | -2.0498260000 |
| C | 3.0622060000  | 2.3413680000  | -1.7461030000 |
| C | 2.5633210000  | 1.0489690000  | -1.5726410000 |
| C | -2.6975060000 | -0.3512820000 | -1.2660250000 |
| C | -1.4101170000 | -0.8720820000 | -1.2221390000 |
| O | -5.2088210000 | 0.7044000000  | -1.2120780000 |
| H | 3.5005990000  | 4.2230550000  | -0.8004740000 |
| C | 3.1144930000  | 3.2192100000  | -0.6637440000 |
| C | 2.1245320000  | 0.6559340000  | -0.3112200000 |
| N | -4.5211360000 | 0.9400970000  | -0.2225730000 |
| C | -3.1558260000 | 0.3867130000  | -0.1759670000 |
| C | -0.6413940000 | -0.6251410000 | -0.0907910000 |
| I | 1.3737270000  | -1.4167740000 | -0.0407030000 |
| O | 0.2117720000  | -3.5280160000 | 0.1000500000  |
| C | 2.6698920000  | 2.8076530000  | 0.5927580000  |
| O | -4.9077500000 | 1.6113620000  | 0.7295920000  |
| C | 2.1719170000  | 1.5159100000  | 0.7830130000  |
| C | -2.3737300000 | 0.6190260000  | 0.9514640000  |



|   |               |               |              |   |               |               |               |
|---|---------------|---------------|--------------|---|---------------|---------------|---------------|
| H | -0.2204650000 | -3.5913370000 | 0.9607330000 | C | -2.1302410000 | -0.1852790000 | -1.4967700000 |
| C | -1.0792010000 | 0.1026950000  | 1.0049530000 | H | 6.1376690000  | 1.3593730000  | -1.2697030000 |
| H | 2.7090750000  | 3.4923030000  | 1.4331870000 | C | 2.3730040000  | -0.4283140000 | -1.1423050000 |
| H | 1.8096000000  | 1.1985390000  | 1.7604740000 | C | 3.4578070000  | 0.4529080000  | -1.1376390000 |
| H | -2.7680590000 | 1.1915020000  | 1.7795890000 | C | 5.6244820000  | 2.2850130000  | -0.9921660000 |
| H | -0.4512530000 | 0.2703400000  | 1.8973190000 | O | -4.1340450000 | 2.7561770000  | -0.8233080000 |
| O | 0.6648780000  | 0.6325210000  | 3.3895040000 | H | 6.3565760000  | 3.0245180000  | -0.6744490000 |
| H | 0.5269380000  | 0.2056050000  | 4.2424740000 | C | -3.2503590000 | 1.7506640000  | -0.5736720000 |

**1c-(OH)OH (B3LYP-D3, CH<sub>2</sub>Cl<sub>2</sub>)**

|                  |   |             |
|------------------|---|-------------|
| $E_0 + E_{ZPE}$  | = | -855.399393 |
| $E_0 + E_{tot}$  | = | -855.377118 |
| $E_0 + H_{corr}$ | = | -855.376174 |
| $E_0 + G_{corr}$ | = | -855.452677 |

Coordinates:

|   |               |               |               |
|---|---------------|---------------|---------------|
| H | -3.6003230000 | 0.9791500000  | -2.5463070000 |
| H | -2.0286550000 | -0.9282210000 | -2.2716990000 |
| H | 4.0760850000  | 0.5115560000  | -2.0258590000 |
| H | 2.1679590000  | -1.0272260000 | -2.0202220000 |
| H | 5.0777920000  | 2.6348510000  | -1.8843410000 |
| C | -3.0581690000 | 0.8390810000  | -1.6190840000 |
| C | -2.1760550000 | -0.2205570000 | -1.4672410000 |
| H | 6.1442930000  | 1.3334600000  | -1.2776830000 |
| C | 3.4652710000  | 0.4333780000  | -1.1369580000 |
| C | 2.3770360000  | -0.4442720000 | -1.1299920000 |
| C | 5.6315920000  | 2.2645460000  | -1.0156850000 |
| O | -4.1487870000 | 2.7493070000  | -0.8213720000 |
| H | 6.3655800000  | 3.0080090000  | -0.7108370000 |
| C | -3.2601830000 | 1.7457060000  | -0.5681870000 |
| C | -1.5033490000 | -0.3486000000 | -0.2562630000 |
| O | -2.0860750000 | -3.3908930000 | -0.2493220000 |
| H | -5.1358090000 | 4.3992350000  | -0.2072500000 |
| I | -0.1118640000 | -1.9914840000 | -0.0184580000 |
| C | 1.5769770000  | -0.5584170000 | -0.0008150000 |
| C | 3.7369530000  | 1.1947640000  | 0.0034780000  |
| O | 4.7703950000  | 2.0832140000  | 0.1083120000  |
| C | -4.4075470000 | 3.7060170000  | 0.2089330000  |
| H | -2.7567900000 | -3.1143290000 | 0.3867910000  |
| H | -3.4979280000 | 4.2503350000  | 0.4803640000  |
| C | -2.5725040000 | 1.5832280000  | 0.6373860000  |
| C | -1.6777770000 | 0.5198840000  | 0.8043590000  |
| H | -4.8267380000 | 3.2254850000  | 1.0981190000  |
| C | 2.9217090000  | 1.0723100000  | 1.1362650000  |
| C | 1.8427120000  | 0.1967530000  | 1.1434830000  |
| H | -2.7159460000 | 2.2655860000  | 1.4638810000  |
| H | -1.1529190000 | 0.4002430000  | 1.7647790000  |
| H | 3.1478990000  | 1.6759260000  | 2.0080130000  |
| H | 1.2029400000  | 0.1260280000  | 2.0281120000  |
| O | -0.2107220000 | 0.3268160000  | 3.4709440000  |
| H | -0.5171300000 | -0.2419410000 | 4.1858590000  |

**1c-(OH)OH (B3LYP-D3, H<sub>2</sub>O)**

|                  |   |             |
|------------------|---|-------------|
| $E_0 + E_{ZPE}$  | = | -855.414195 |
| $E_0 + E_{tot}$  | = | -855.391710 |
| $E_0 + H_{corr}$ | = | -855.390766 |
| $E_0 + G_{corr}$ | = | -855.467906 |

Coordinates:

|   |               |               |               |
|---|---------------|---------------|---------------|
| H | -3.5242480000 | 1.0408790000  | -2.5836580000 |
| H | -1.9513990000 | -0.8635730000 | -2.3199180000 |
| H | 2.1610590000  | -0.9947240000 | -2.0419190000 |
| H | 4.0632200000  | 0.5495230000  | -2.0281870000 |
| H | 5.0671550000  | 2.6691090000  | -1.8518340000 |
| C | -3.0119310000 | 0.8753240000  | -1.6438100000 |

|   |               |               |               |
|---|---------------|---------------|---------------|
| C | -2.1302410000 | -0.1852790000 | -1.4967700000 |
| H | 6.1376690000  | 1.3593730000  | -1.2697030000 |
| C | 2.3730040000  | -0.4283140000 | -1.1423050000 |
| C | 3.4578070000  | 0.4529080000  | -1.1376390000 |
| C | 5.6244820000  | 2.2850130000  | -0.9921660000 |
| O | -4.1340450000 | 2.7561770000  | -0.8233080000 |
| H | 6.3565760000  | 3.0245180000  | -0.6744490000 |
| C | -3.2503590000 | 1.7506640000  | -0.5736720000 |
| C | -1.4948040000 | -0.3486180000 | -0.2697040000 |
| O | -2.1112500000 | -3.3904560000 | -0.2203740000 |
| H | -5.1456500000 | 4.3871000000  | -0.1953750000 |
| I | -0.1066230000 | -1.9907690000 | -0.0351430000 |
| C | 1.5801620000  | -0.5662440000 | -0.0107200000 |
| C | 3.7346630000  | 1.1935200000  | 0.0156360000  |
| O | 4.7638750000  | 2.0815350000  | 0.1321210000  |
| C | -4.4263060000 | 3.6871430000  | 0.2241820000  |
| H | -2.8016530000 | -3.0438550000 | 0.3577590000  |
| H | -3.5267980000 | 4.2277380000  | 0.5329580000  |
| C | -2.5966960000 | 1.5562840000  | 0.6468920000  |
| C | -1.7042800000 | 0.4908370000  | 0.8089770000  |
| H | -4.8680760000 | 3.1820640000  | 1.0880760000  |
| C | 1.8504550000  | 0.1675100000  | 1.1465450000  |
| C | 2.9261500000  | 1.0466110000  | 1.1512390000  |
| H | -2.7669140000 | 2.2167590000  | 1.4861190000  |
| H | -1.2009180000 | 0.3516180000  | 1.7743800000  |
| H | 1.2185860000  | 0.0778030000  | 2.0309580000  |
| H | 3.1569590000  | 1.6332700000  | 2.0332760000  |
| O | -0.2332010000 | 0.2902320000  | 3.5157460000  |
| H | -0.6001840000 | -0.0708660000 | 4.3305120000  |

**1d-(OH)OH (B3LYP-D3, CH<sub>2</sub>Cl<sub>2</sub>)**

|                  |   |             |
|------------------|---|-------------|
| $E_0 + E_{ZPE}$  | = | -626.338416 |
| $E_0 + E_{tot}$  | = | -626.321460 |
| $E_0 + H_{corr}$ | = | -626.320515 |
| $E_0 + G_{corr}$ | = | -626.384645 |

Coordinates

|   |               |               |               |
|---|---------------|---------------|---------------|
| H | -3.4277780000 | 1.5256080000  | -2.6830680000 |
| H | 4.0490060000  | 0.0373050000  | -2.5826080000 |
| H | 1.9586700000  | -1.2016350000 | -2.1104190000 |
| H | -2.1122270000 | -0.4987690000 | -2.1063730000 |
| C | -2.8477170000 | 1.5036940000  | -1.7676240000 |
| C | 3.5125950000  | 0.2179390000  | -1.6573830000 |
| C | -2.1059930000 | 0.3644630000  | -1.4553840000 |
| C | 2.3343950000  | -0.4821350000 | -1.3912330000 |
| H | -3.4232720000 | 3.4830310000  | -1.1534910000 |
| H | 4.9044510000  | 1.6954900000  | -0.9445920000 |
| C | -2.8424130000 | 2.6016220000  | -0.9062200000 |
| C | 3.9907560000  | 1.1495280000  | -0.7363000000 |
| C | -1.3736230000 | 0.3766160000  | -0.2770440000 |
| C | 1.6516350000  | -0.2388870000 | -0.2020220000 |
| I | -0.2060140000 | -1.3916400000 | 0.2072790000  |
| C | -2.0967490000 | 2.5653300000  | 0.2700930000  |
| O | -2.3692830000 | -2.4638220000 | 0.3886230000  |
| C | 3.2938980000  | 1.3796840000  | 0.4499210000  |
| C | -1.3398080000 | 1.4379670000  | 0.6105070000  |
| C | 2.1150910000  | 0.6835960000  | 0.7320790000  |
| H | -2.0969260000 | 3.4146780000  | 0.9445080000  |
| H | -2.8933230000 | -2.0209700000 | 1.0671800000  |
| H | 3.6642690000  | 2.1058790000  | 1.1656920000  |
| H | -0.7616820000 | 1.4135380000  | 1.5478920000  |
| H | 1.5629070000  | 0.8756440000  | 1.6561940000  |
| O | 0.3326940000  | 1.5095040000  | 3.1359750000  |

H 0.0349690000 1.2051750000 4.0001750000

**1d-(OH)OH (B3LYP-D3, H<sub>2</sub>O)**

$E_0 + E_{ZPE}$  = -626.352324  
 $E_0 + E_{tot}$  = -626.335084  
 $E_0 + H_{corr}$  = -626.334140  
 $E_0 + G_{corr}$  = -626.398950

Coordinates

H -3.3173680000 1.5964950000 -2.7489870000  
H 4.0571730000 0.0804380000 -2.5668160000  
H -2.0089910000 -0.4342220000 -2.1907220000  
H 1.9709990000 -1.1756270000 -2.1256970000  
C -2.7814950000 1.5450640000 -1.8084180000  
C 3.5142330000 0.2461070000 -1.6429590000  
C -2.0448950000 0.4000450000 -1.5035290000  
C 2.3380490000 -0.4643120000 -1.3946310000  
H -3.4008410000 3.4973560000 -1.1528430000  
C -2.8250160000 2.6117740000 -0.9101580000  
H 4.8949600000 1.7198540000 -0.9017050000  
C 3.9826310000 1.1673600000 -0.7067220000  
C -1.3681980000 0.3726150000 -0.2923070000  
C 1.6479570000 -0.2401190000 -0.2064880000  
I -0.2054000000 -1.3968960000 0.1874680000  
C -2.1306200000 2.5406610000 0.2958790000  
O -2.3829680000 -2.4701140000 0.4088690000  
C 3.2779660000 1.3786280000 0.4785400000  
C -1.3815240000 1.4066960000 0.6294230000  
C 2.1015620000 0.6719990000 0.7429170000  
H -2.1655920000 3.3687930000 0.9951500000  
H -2.8926180000 -2.0202560000 1.0938630000  
H 3.6422570000 2.0964320000 1.2057880000  
H -0.8339060000 1.3605850000 1.5784330000  
H 1.5466430000 0.8482070000 1.6651210000  
O 0.3050700000 1.4607110000 3.2148990000  
H 0.0327890000 1.3535520000 4.1331600000

**1d-(OH)OH (M06-2X, Toluene)**

$E_0 + E_{ZPE}$  = 625.950965  
 $E_0 + E_{tot}$  = -625.934650  
 $E_0 + H_{corr}$  = -625.933706  
 $E_0 + G_{corr}$  = -625.996162

Coordinates

H 3.8474090000 0.3033230000 -2.7175380000  
H -3.6633280000 1.5866300000 -2.3609720000  
H 1.7444580000 -0.9102260000 -2.2483680000  
H -2.3678500000 -0.4907000000 -1.8923660000  
C 3.3869680000 0.3787690000 -1.7385420000  
C -2.9762980000 1.5534620000 -1.5234980000  
C 2.2032250000 -0.3045810000 -1.4728710000  
C -2.2450560000 0.3948460000 -1.2829070000  
H 4.8921140000 1.6927680000 -0.9482760000  
H -3.4033950000 3.5576480000 -0.8795940000  
C 3.9705050000 1.1586530000 -0.7445570000  
C -2.8284820000 2.6585930000 -0.6880680000  
C 1.6131930000 -0.2039600000 -0.2163350000  
C -1.3705780000 0.3993880000 -0.2079650000  
I -0.2116060000 -1.3701090000 0.1441460000  
O -2.2882600000 -2.3838520000 0.1586990000  
C -1.9595200000 2.6072550000 0.3957040000  
C 3.3695030000 1.2545090000 0.5067420000  
C -1.2044840000 1.4616460000 0.6604820000  
C 2.1837420000 0.5739150000 0.7863250000  
H -2.8445890000 -2.0550010000 0.8706780000

H -1.8665360000 3.4569860000 1.0621450000  
H 3.8197070000 1.8675540000 1.2797320000  
H -0.5580620000 1.3842460000 1.5546870000  
H 1.6910000000 0.6630500000 1.7635940000  
O 0.4181590000 1.0454430000 3.1073410000  
H 0.0287080000 0.6718320000 3.9011660000

**TS1-1a (B3LYP-D3, CH<sub>2</sub>Cl<sub>2</sub>)**

$E_0 + E_{ZPE}$  = -830.905137  
 $E_0 + E_{tot}$  = -830.885673  
 $E_0 + H_{corr}$  = -830.884729  
 $E_0 + G_{corr}$  = -830.956727

Frequency: -1254.990

Coordinates:

H 3.6227100000 2.8142950000 -2.4440340000  
H 2.7474420000 0.5053330000 -2.2836910000  
H -3.2559190000 -0.2900040000 -2.2358440000  
H -0.9367090000 -1.2158740000 -2.1552200000  
C 3.1955180000 2.4639070000 -1.5107490000  
C 2.7032890000 1.1604930000 -1.4206900000  
C -2.6597350000 -0.2199790000 -1.3375510000  
O -5.1660530000 0.8444570000 -1.2928530000  
C -1.3688050000 -0.7293380000 -1.2916530000  
H 3.5123170000 4.3238920000 -0.4764150000  
C 3.1317650000 3.3110470000 -0.4051220000  
N -4.5382480000 0.9344330000 -0.2384470000  
C 2.1547110000 0.7164670000 -0.2198890000  
C -3.1709840000 0.3888850000 -0.1876320000  
O 0.3457490000 -3.5520690000 -0.1360180000  
I 1.4121690000 -1.3764630000 -0.0931410000  
C -0.6829590000 -0.5787770000 -0.0906120000  
H -0.2309880000 -3.6403830000 0.6326300000  
O -4.9963690000 1.4591030000 0.7740520000  
C 2.5775590000 2.8555770000 0.7912150000  
C 2.0869560000 1.5520540000 0.8924820000  
C -2.4377110000 0.4958510000 0.9940730000  
C -1.1271560000 -0.0058870000 1.0650000000  
H 2.5248550000 3.5140060000 1.6516220000  
H 1.6427560000 1.1951240000 1.8169230000  
H -2.8939750000 0.9685100000 1.8556630000  
H -0.3958670000 0.0306430000 2.2322160000  
O 0.2606840000 0.0686310000 3.2724990000  
H 0.6193530000 -0.8168410000 3.3970920000

**TS1-1a (B3LYP-D3, H<sub>2</sub>O)**

$E_0 + E_{ZPE}$  = -830.916212  
 $E_0 + E_{tot}$  = -830.896575  
 $E_0 + H_{corr}$  = -830.895631  
 $E_0 + G_{corr}$  = -830.968876

Frequency: -1270.12

Coordinates:

H 3.5870410000 2.9438870000 -2.3361050000  
H -3.1968030000 -0.1068920000 -2.2877570000  
H 2.7610480000 0.6123060000 -2.2662850000  
H -0.8716220000 -1.0160190000 -2.2405480000  
C 3.1595070000 2.5518250000 -1.4199760000  
C 2.6956400000 1.2352560000 -1.3815650000  
C -2.6220740000 -0.1149730000 -1.3729800000  
C -1.3278360000 -0.6182460000 -1.3443110000  
O -5.1588990000 0.8718940000 -1.2736770000

|   |               |               |               |
|---|---------------|---------------|---------------|
| H | 3.4265640000  | 4.3807020000  | -0.3188100000 |
| C | 3.0676160000  | 3.3582780000  | -0.2862050000 |
| N | -4.5335320000 | 0.9217200000  | -0.2156860000 |
| C | 2.1464920000  | 0.7399440000  | -0.2018180000 |
| O | 0.3585140000  | -3.5595670000 | -0.1991740000 |
| C | -3.1620340000 | 0.3858340000  | -0.1850510000 |
| I | 1.4291970000  | -1.3589200000 | -0.1408340000 |
| C | -0.6724750000 | -0.5750050000 | -0.1177490000 |
| H | -0.1502170000 | -3.6755610000 | 0.6126100000  |
| O | -4.9984560000 | 1.3972980000  | 0.8180930000  |
| C | 2.5136500000  | 2.8499870000  | 0.8889410000  |
| C | 2.0514560000  | 1.5333940000  | 0.9388780000  |
| C | -2.4545060000 | 0.3942280000  | 1.0172660000  |
| C | -1.1428640000 | -0.1068610000 | 1.0742010000  |
| H | 2.4402710000  | 3.4767040000  | 1.7710450000  |
| H | 1.6075300000  | 1.1352840000  | 1.8457650000  |
| H | -2.9335850000 | 0.7893040000  | 1.9052000000  |
| H | -0.4115090000 | -0.1466520000 | 2.2600760000  |
| H | 0.7858150000  | -0.9525690000 | 3.2522930000  |
| O | 0.2272540000  | -0.1685950000 | 3.2946010000  |

**TS1-1c (B3LYP-D3, CH<sub>2</sub>Cl<sub>2</sub>)**

|                  |   |             |
|------------------|---|-------------|
| $E_0 + E_{ZPE}$  | = | -855.391237 |
| $E_0 + E_{tot}$  | = | -855.369371 |
| $E_0 + H_{corr}$ | = | -855.368427 |
| $E_0 + G_{corr}$ | = | -855.444359 |

Frequency: -1176.000

Coordinates:

|   |               |               |               |
|---|---------------|---------------|---------------|
| H | -1.9769720000 | -0.3632570000 | -2.1801420000 |
| H | 2.1993710000  | -0.7104010000 | -2.1509850000 |
| H | -3.5610350000 | 1.5291360000  | -2.0622780000 |
| H | 4.0942360000  | 0.8338630000  | -1.9867980000 |
| H | -4.1756910000 | 3.7536480000  | -1.6574740000 |
| H | 5.0861040000  | 2.9227720000  | -1.5914540000 |
| H | -5.4966540000 | 2.6046770000  | -1.2955110000 |
| C | -2.1515810000 | 0.1417620000  | -1.2388770000 |
| C | 2.4191290000  | -0.2475890000 | -1.1951790000 |
| H | 6.1720320000  | 1.5664490000  | -1.1682900000 |
| C | -3.0491480000 | 1.2102730000  | -1.1649280000 |
| C | 3.5002170000  | 0.6346960000  | -1.1053420000 |
| C | -4.8474130000 | 3.3808820000  | -0.8769930000 |
| C | 5.6566450000  | 2.4526300000  | -0.7841220000 |
| O | -2.0337730000 | -3.3720250000 | -0.6189030000 |
| H | -5.4591680000 | 4.2015520000  | -0.5061020000 |
| H | 6.3897100000  | 3.1592380000  | -0.3997640000 |
| I | -0.0529110000 | -1.9366910000 | -0.2625150000 |
| C | 1.6370160000  | -0.5221080000 | -0.0806800000 |
| C | -1.5220920000 | -0.2207480000 | -0.0610690000 |
| H | -2.7478440000 | -3.0690950000 | -0.0453470000 |
| C | -3.2604550000 | 1.8399350000  | 0.0696200000  |
| C | 3.7868540000  | 1.2451380000  | 0.1184600000  |
| O | -4.1179030000 | 2.8959190000  | 0.2482880000  |
| O | 4.8147590000  | 2.1238180000  | 0.3209440000  |
| C | 1.9240720000  | 0.0857690000  | 1.1437510000  |
| C | -1.6757580000 | 0.3295060000  | 1.1748860000  |
| C | -2.5828160000 | 1.3985190000  | 1.2144450000  |
| C | 2.9932550000  | 0.9672330000  | 1.2389110000  |
| H | 1.3041730000  | -0.1166620000 | 2.0121010000  |
| H | -2.7901970000 | 1.9141900000  | 2.1493480000  |
| H | 3.2303860000  | 1.4531850000  | 2.1784230000  |
| H | -1.0414600000 | -0.1649530000 | 2.3488920000  |
| H | -0.6210180000 | -1.5418510000 | 3.2952090000  |

**TS1-1c (B3LYP-D3, H<sub>2</sub>O)**

|                  |   |             |
|------------------|---|-------------|
| $E_0 + E_{ZPE}$  | = | -855.404715 |
| $E_0 + E_{tot}$  | = | -855.382542 |
| $E_0 + H_{corr}$ | = | -855.381597 |
| $E_0 + G_{corr}$ | = | -855.458775 |

Frequency: -1143.760

Coordinates:

|   |               |               |               |
|---|---------------|---------------|---------------|
| H | -1.7775890000 | -0.1379010000 | -2.2413420000 |
| H | 2.2451190000  | -0.6925250000 | -2.1523940000 |
| H | -3.3397400000 | 1.7668570000  | -2.0751530000 |
| H | 4.1239510000  | 0.8615770000  | -1.9204110000 |
| H | -3.9446920000 | 3.9616360000  | -1.5053830000 |
| H | 5.0900350000  | 2.9532370000  | -1.4749600000 |
| H | -5.3155330000 | 2.8205630000  | -1.3798750000 |
| C | -2.0294180000 | 0.2744780000  | -1.2727080000 |
| C | 2.4385860000  | -0.2417130000 | -1.1857140000 |
| C | -2.9137410000 | 1.3517880000  | -1.1724080000 |
| C | 3.5102400000  | 0.6467490000  | -1.0565460000 |
| H | 6.1763200000  | 1.5999300000  | -1.0417730000 |
| C | -4.6924540000 | 3.5333430000  | -0.8304560000 |
| C | 5.6450240000  | 2.4773730000  | -0.6608360000 |
| O | -2.0902980000 | -3.3542010000 | -0.6513740000 |
| H | -5.3188990000 | 4.3297250000  | -0.4330180000 |
| I | -0.0557380000 | -1.9344910000 | -0.3190280000 |
| H | 6.3613920000  | 3.1844940000  | -0.2477910000 |
| C | 1.6325020000  | -0.5349890000 | -0.0935460000 |
| C | -1.5127180000 | -0.2133050000 | -0.0847050000 |
| H | -2.7852940000 | -3.0146110000 | -0.0749020000 |
| C | -3.2229160000 | 1.8659060000  | 0.0950070000  |
| C | 3.7630310000  | 1.2437340000  | 0.1817830000  |
| O | -4.0762600000 | 2.9175550000  | 0.3018670000  |
| O | 4.7765240000  | 2.1264910000  | 0.4200120000  |
| C | 1.8854410000  | 0.0575310000  | 1.1456170000  |
| C | -1.7598610000 | 0.2222810000  | 1.1816710000  |
| C | -2.6512320000 | 1.3037420000  | 1.2458500000  |
| C | 2.9448150000  | 0.9449620000  | 1.2799090000  |
| H | 1.2482300000  | -0.1604770000 | 1.9962290000  |
| H | -2.9278660000 | 1.7390270000  | 2.2036710000  |
| H | 3.1558110000  | 1.4185420000  | 2.2318030000  |
| H | -1.1753660000 | -0.3834450000 | 2.3491080000  |
| H | -0.4815880000 | -1.7867750000 | 3.0484410000  |
| O | -0.6854650000 | -0.8802340000 | 3.3030870000  |

**TS1-1d (B3LYP-D3, CH<sub>2</sub>Cl<sub>2</sub>)**

|                  |   |             |
|------------------|---|-------------|
| $E_0 + E_{ZPE}$  | = | -626.331982 |
| $E_0 + E_{tot}$  | = | -626.314966 |
| $E_0 + H_{corr}$ | = | -626.314021 |
| $E_0 + G_{corr}$ | = | -626.379538 |

Frequency: -1228.320

Coordinates:

|   |               |               |               |
|---|---------------|---------------|---------------|
| H | -3.1317760000 | 1.8382730000  | -2.7873070000 |
| H | -1.7402250000 | -0.1820420000 | -2.3374410000 |
| H | 4.3222800000  | 0.4200610000  | -2.2247970000 |
| H | 2.2878420000  | -0.9747330000 | -2.0252120000 |
| C | -2.6947360000 | 1.6895200000  | -1.8060140000 |
| C | -1.9148700000 | 0.5565700000  | -1.5663600000 |
| C | 3.6830210000  | 0.5215370000  | -1.3544070000 |
| C | 2.5362590000  | -0.2672600000 | -1.2417460000 |

|   |               |               |               |   |               |               |               |
|---|---------------|---------------|---------------|---|---------------|---------------|---------------|
| H | -3.5135750000 | 3.4969880000  | -0.9738960000 | H | 1.8733650000  | -1.1358440000 | -2.0710030000 |
| C | -2.9049760000 | 2.6185060000  | -0.7819380000 | C | 3.5198770000  | 0.1823210000  | -1.6806720000 |
| H | 4.8890510000  | 2.0530150000  | -0.4422850000 | H | -2.5960380000 | -0.9579230000 | -1.5571190000 |
| C | 3.9995530000  | 1.4391760000  | -0.3535250000 | C | -3.2706160000 | 1.1017530000  | -1.5383080000 |
| C | -1.3946430000 | 0.4528170000  | -0.2845670000 | C | 2.3184880000  | -0.4441060000 | -1.3624540000 |
| C | 1.7159250000  | -0.1334260000 | -0.1238760000 | H | -3.7009220000 | 3.1935810000  | -1.2841990000 |
| I | -0.0964020000 | -1.4069730000 | 0.0469370000  | C | -2.4386810000 | 0.0448030000  | -1.1793730000 |
| O | -2.2055630000 | -2.6784030000 | 0.0614310000  | H | 5.0367630000  | 1.5510190000  | -1.0151870000 |
| C | -2.3403880000 | 2.4197900000  | 0.4783410000  | C | -3.0527480000 | 2.3709090000  | -0.9991490000 |
| H | -2.8358260000 | -2.2169410000 | 0.6275360000  | C | 4.0998680000  | 1.0614570000  | -0.7751580000 |
| C | 3.1698810000  | 1.5671090000  | 0.7605350000  | C | -1.4382620000 | 0.3438120000  | -0.2648440000 |
| C | -1.5436650000 | 1.2900290000  | 0.7685380000  | C | 1.6848070000  | -0.1854640000 | -0.1462310000 |
| C | 2.0237460000  | 0.7791140000  | 0.8833090000  | C | -2.0375580000 | 2.5693670000  | -0.0734620000 |
| H | -2.5237140000 | 3.1542750000  | 1.2596150000  | I | -0.1320840000 | -1.3473970000 | 0.2909770000  |
| H | 3.4125500000  | 2.2817010000  | 1.5398250000  | C | -1.1887100000 | 1.5286050000  | 0.3478290000  |
| H | 1.3708720000  | 0.8832630000  | 1.7443390000  | H | -1.9146240000 | 3.5483910000  | 0.3836720000  |
| H | -0.9986820000 | 1.0472470000  | 2.0460450000  | C | 3.4652020000  | 1.3297450000  | 0.4322320000  |
| O | -0.5229690000 | 0.8381380000  | 3.1311810000  | O | -2.1409320000 | -2.5008280000 | 0.5022020000  |
| H | -0.6118700000 | -0.1103040000 | 3.2752850000  | C | 2.2573570000  | 0.7159370000  | 0.7619600000  |

#### TS1-1d (B3LYP-D3, H<sub>2</sub>O)

|                  |   |             |
|------------------|---|-------------|
| $E_0 + E_{ZPE}$  | = | -626.343837 |
| $E_0 + E_{tot}$  | = | -626.326845 |
| $E_0 + H_{corr}$ | = | -626.325901 |
| $E_0 + G_{corr}$ | = | -626.391100 |

Frequency: -1217.270

Coordinates:

|   |               |               |               |
|---|---------------|---------------|---------------|
| H | -2.9048040000 | 2.0846750000  | -2.8015240000 |
| H | -1.5444560000 | 0.0298930000  | -2.4208130000 |
| H | 4.3843260000  | 0.5132940000  | -2.0952370000 |
| H | 2.3595560000  | -0.9059150000 | -2.0086400000 |
| C | -2.5506900000 | 1.8476170000  | -1.8044950000 |
| C | -1.7891950000 | 0.6945520000  | -1.6027910000 |
| C | 3.7148730000  | 0.5828080000  | -1.2449950000 |
| C | 2.5733370000  | -0.2203380000 | -1.1965660000 |
| H | -3.4404260000 | 3.5779150000  | -0.8862660000 |
| C | -2.8475500000 | 2.6833510000  | -0.7230550000 |
| C | -1.3785080000 | 0.4769170000  | -0.2957050000 |
| H | 4.8733230000  | 2.0971100000  | -0.2474450000 |
| C | 3.9878460000  | 1.4729430000  | -0.2072280000 |
| C | 1.7154970000  | -0.1260440000 | -0.1036520000 |
| O | -2.2209960000 | -2.6962730000 | -0.0605240000 |
| I | -0.0899180000 | -1.4056160000 | -0.0254610000 |
| C | -2.3873150000 | 2.3726450000  | 0.5572750000  |
| H | -2.7963590000 | -2.3382150000 | 0.6262920000  |
| C | -1.6134460000 | 1.2177350000  | 0.8118250000  |
| C | 3.1207280000  | 1.5596870000  | 0.8822490000  |
| C | 1.9802170000  | 0.7568220000  | 0.9413790000  |
| H | -2.6351500000 | 3.0394440000  | 1.3803500000  |
| H | 3.3306450000  | 2.2515740000  | 1.6906830000  |
| H | 1.3005150000  | 0.8279090000  | 1.7840600000  |
| H | -1.1385190000 | 0.8626280000  | 2.1047070000  |
| H | -0.5503480000 | -0.3827740000 | 3.1403510000  |
| O | -0.7324320000 | 0.5622670000  | 3.1852060000  |

#### TS1-1d (M06-2X, Toluene)

|                  |   |             |
|------------------|---|-------------|
| $E_0 + E_{ZPE}$  | = | -625.947943 |
| $E_0 + E_{tot}$  | = | -625.931756 |
| $E_0 + H_{corr}$ | = | -625.930812 |
| $E_0 + G_{corr}$ | = | -625.994000 |

Frequency: -1175.400

Coordinates:

|   |               |               |               |
|---|---------------|---------------|---------------|
| H | 3.9999310000  | -0.0215210000 | -2.6317680000 |
| H | -4.0720210000 | 0.9387340000  | -2.2496710000 |

#### TS2-1a (B3LYP-D3, CH<sub>2</sub>Cl<sub>2</sub>)

|                  |   |             |
|------------------|---|-------------|
| $E_0 + E_{ZPE}$  | = | -754.945733 |
| $E_0 + E_{tot}$  | = | -754.929531 |
| $E_0 + H_{corr}$ | = | -754.928587 |
| $E_0 + G_{corr}$ | = | -754.993321 |

Frequency: -1216.100

Coordinates:

|   |               |               |               |
|---|---------------|---------------|---------------|
| H | 2.4701730000  | -0.5885600000 | -2.1531450000 |
| H | 3.6832830000  | -2.7455000000 | -2.1350080000 |
| C | 2.7350700000  | -1.0555860000 | -1.2133680000 |
| C | 3.4169190000  | -2.2720580000 | -1.1975270000 |
| O | -0.4535770000 | 3.4821380000  | -0.0568600000 |
| H | -1.2814780000 | 2.6100870000  | -0.0253010000 |
| H | -3.9732770000 | 1.3707710000  | -0.0190740000 |
| C | -1.7992090000 | 1.3131140000  | -0.0153580000 |
| C | -3.0853330000 | 0.7515550000  | -0.0116390000 |
| I | 1.3085660000  | 1.4059640000  | -0.0101610000 |
| O | -4.6772570000 | -2.4504410000 | -0.0084000000 |
| C | -0.8017380000 | 0.4100610000  | -0.0075920000 |
| C | -0.8402560000 | -0.9722490000 | -0.0023500000 |
| C | -3.2189200000 | -0.6386840000 | -0.0016300000 |
| H | 0.0340380000  | -1.6083580000 | -0.0000500000 |
| C | 2.3997640000  | -0.4627790000 | 0.0009600000  |
| C | -2.1249030000 | -1.5096090000 | 0.0021250000  |
| N | -4.5729590000 | -1.2263310000 | 0.0031410000  |
| H | -2.2755470000 | -2.5794920000 | 0.0091620000  |
| C | 3.7510440000  | -2.8737470000 | 0.0149000000  |
| O | -5.5352430000 | -0.4645320000 | 0.0184980000  |
| H | 4.2796840000  | -3.8195170000 | 0.0203570000  |
| H | -0.4782990000 | 3.9089670000  | 0.8080400000  |
| C | 3.4082880000  | -2.2629730000 | 1.2203730000  |
| C | 2.7265560000  | -1.0463710000 | 1.2221060000  |
| H | 2.4551170000  | -0.5721290000 | 2.1564280000  |
| H | 3.6679380000  | -2.7294240000 | 2.1632380000  |

#### TS2-1a (B3LYP-D3, H<sub>2</sub>O)

|                 |   |             |
|-----------------|---|-------------|
| $E_0 + E_{ZPE}$ | = | -754.949131 |
|-----------------|---|-------------|

$E_0 + E_{\text{tot}} = -754.932849$   
 $E_0 + H_{\text{corr}} = -754.931904$   
 $E_0 + G_{\text{corr}} = -754.997314$   
 Frequency: -1214.980  
 Coordinates:

|   |               |               |               |
|---|---------------|---------------|---------------|
| H | -2.4735220000 | 0.5837020000  | -2.1537130000 |
| H | -3.6985460000 | 2.7340800000  | -2.1339770000 |
| C | -2.7411910000 | 1.0488880000  | -1.2140300000 |
| C | -3.4298140000 | 2.2615490000  | -1.1967930000 |
| O | 0.4905600000  | -3.5055780000 | -0.0557080000 |
| H | 1.2939700000  | -2.6174850000 | -0.0231030000 |
| H | 3.9770500000  | -1.3614360000 | -0.0186910000 |
| C | 1.8033950000  | -1.3113460000 | -0.0169220000 |
| C | 3.0872150000  | -0.7448430000 | -0.0120970000 |
| I | -1.3052830000 | -1.4023070000 | -0.0109810000 |
| O | 4.6723130000  | 2.4605760000  | -0.0108290000 |
| C | 0.8024440000  | -0.4102300000 | -0.0092720000 |
| C | 0.8382620000  | 0.9723180000  | -0.0025540000 |
| C | 3.2173870000  | 0.6460450000  | -0.0015400000 |
| H | -0.0373880000 | 1.6064810000  | 0.0005700000  |
| C | -2.4034730000 | 0.4592640000  | 0.0009140000  |
| C | 2.1209330000  | 1.5139160000  | 0.0024560000  |
| N | 4.5686670000  | 1.2360990000  | 0.0035710000  |
| H | 2.2667810000  | 2.5843870000  | 0.0104650000  |
| C | -3.7673160000 | 2.8602890000  | 0.0162640000  |
| O | 5.5341390000  | 0.4771230000  | 0.0217180000  |
| H | -4.3010910000 | 3.8031130000  | 0.0223020000  |
| H | 0.4983290000  | -3.9072170000 | 0.8216190000  |
| C | -3.4214900000 | 2.2507950000  | 1.2216030000  |
| C | -2.7329630000 | 1.0379620000  | 1.2233710000  |
| H | -2.4589310000 | 0.5642660000  | 2.1569740000  |
| H | -3.6837400000 | 2.7150740000  | 2.1647310000  |

**TS2-1a (M06-2X, Toluene)**

$E_0 + E_{\text{ZPE}} = -754.550115$   
 $E_0 + E_{\text{tot}} = -754.534352$   
 $E_0 + H_{\text{corr}} = -754.533408$   
 $E_0 + G_{\text{corr}} = -754.596122$   
 Frequency: -1178.02  
 Coordinates:

|   |               |               |               |
|---|---------------|---------------|---------------|
| H | -2.3920980000 | 0.5944970000  | -2.1502960000 |
| H | -3.5542050000 | 2.7778050000  | -2.1452750000 |
| C | -2.6530600000 | 1.0700880000  | -1.2125140000 |
| C | -3.3049910000 | 2.2994360000  | -1.2060720000 |
| O | 0.2873800000  | -3.3995530000 | -0.0675170000 |
| H | 1.2127560000  | -2.5961890000 | -0.0411810000 |
| H | 3.9250350000  | -1.3899300000 | -0.0375490000 |
| C | 1.7525170000  | -1.3410570000 | -0.0216720000 |
| C | 3.0343370000  | -0.7742350000 | -0.0207990000 |
| I | -1.2903390000 | -1.4016240000 | -0.0032920000 |
| C | 3.1664960000  | 0.6077630000  | -0.0005470000 |
| C | 0.7454020000  | -0.4336970000 | -0.0003180000 |
| C | -2.3358640000 | 0.4686180000  | 0.0000600000  |
| C | -3.6314560000 | 2.9103880000  | 0.0002360000  |
| H | -4.1370730000 | 3.8682770000  | 0.0003080000  |
| N | 4.5243480000  | 1.1934300000  | 0.0021670000  |
| O | 5.4686440000  | 0.4335110000  | 0.0032330000  |
| O | 4.6199870000  | 2.4036530000  | 0.0037680000  |
| C | 0.8013900000  | 0.9494890000  | 0.0149600000  |
| C | 2.0840140000  | 1.4825470000  | 0.0160970000  |
| H | -0.0670920000 | 1.5947330000  | 0.0266840000  |
| H | 2.2455630000  | 2.5511200000  | 0.0299250000  |

|   |               |               |              |
|---|---------------|---------------|--------------|
| H | 0.3370300000  | -3.9303240000 | 0.7330280000 |
| C | -3.3125880000 | 2.2953000000  | 1.2064980000 |
| C | -2.6606710000 | 1.0659280000  | 1.2126700000 |
| H | -3.5678880000 | 2.7705070000  | 2.1456830000 |
| H | -2.4057160000 | 0.5872660000  | 2.1505450000 |

**TS2-1c (B3LYP-D3, CH<sub>2</sub>Cl<sub>2</sub>)**

$E_0 + E_{\text{ZPE}} = -779.437494$   
 $E_0 + E_{\text{tot}} = -779.418572$   
 $E_0 + H_{\text{corr}} = -779.417628$   
 $E_0 + G_{\text{corr}} = -779.487374$   
 Frequency: -1195.640  
 Coordinates:

|   |               |               |               |
|---|---------------|---------------|---------------|
| H | -1.9955800000 | -0.5183890000 | -2.0389760000 |
| H | -3.9530430000 | 0.9475510000  | -1.9219830000 |
| H | -5.0706800000 | 2.9448420000  | -1.3693860000 |
| H | -6.1528940000 | 1.5200020000  | -1.3054160000 |
| C | -2.3647250000 | -0.2042100000 | -1.0710490000 |
| H | 2.6785530000  | -3.3736030000 | -1.0062520000 |
| C | -3.4780750000 | 0.6331850000  | -1.0034170000 |
| H | 5.9238030000  | 2.1760150000  | -0.9370630000 |
| C | -5.7276690000 | 2.3476300000  | -0.7304110000 |
| H | -6.5296550000 | 2.9738400000  | -0.3462230000 |
| O | 2.5192620000  | -3.0517330000 | -0.1111110000 |
| H | 2.8899890000  | -1.9195680000 | -0.1004470000 |
| H | 4.8509490000  | 0.2867060000  | -0.0799780000 |
| C | 2.8383950000  | -0.5054470000 | -0.0524240000 |
| C | 3.7959410000  | 0.5296340000  | -0.0480610000 |
| C | 5.6320450000  | 2.7014950000  | -0.0222570000 |
| I | 0.0080460000  | -1.8692760000 | -0.0124120000 |
| C | 1.5703700000  | -0.0865090000 | -0.0085430000 |
| H | 6.1018640000  | 3.6830340000  | -0.0024600000 |
| C | 3.3785480000  | 1.8670140000  | 0.0007710000  |
| O | 4.2247810000  | 2.9426790000  | 0.0100180000  |
| C | 1.0455080000  | 1.1908040000  | 0.0434080000  |
| C | 2.0104360000  | 2.1937670000  | 0.0455190000  |
| H | -0.0113100000 | 1.4200220000  | 0.0788230000  |
| H | 1.7193380000  | 3.2365930000  | 0.0822270000  |
| C | -1.7406370000 | -0.6201690000 | 0.0987380000  |
| C | -3.9564020000 | 1.0514900000  | 0.2435410000  |
| O | -5.0266200000 | 1.8668940000  | 0.4217330000  |
| H | 5.9555410000  | 2.1245080000  | 0.8497850000  |
| C | -2.2118800000 | -0.2094320000 | 1.3476890000  |
| C | -3.3168220000 | 0.6239440000  | 1.4163700000  |
| H | -1.7220450000 | -0.5293140000 | 2.2583320000  |
| H | -3.7008680000 | 0.9575140000  | 2.3724780000  |

**TS2-1c (B3LYP-D3, H<sub>2</sub>O)**

$E_0 + E_{\text{ZPE}} = -779.440859$   
 $E_0 + E_{\text{tot}} = -779.421842$   
 $E_0 + H_{\text{corr}} = -779.420898$   
 $E_0 + G_{\text{corr}} = -779.491078$   
 Frequency: -1192.360  
 Coordinates:

|   |               |               |               |
|---|---------------|---------------|---------------|
| H | -1.9832820000 | -0.5035000000 | -2.0405100000 |
| H | -3.9433310000 | 0.9581700000  | -1.9246160000 |
| H | -5.0694300000 | 2.9473710000  | -1.3654520000 |
| H | -6.1488690000 | 1.5198980000  | -1.3183860000 |
| C | -2.3591320000 | -0.1972490000 | -1.0728580000 |
| H | 2.6922770000  | -3.3683990000 | -1.0261810000 |
| C | -3.4741020000 | 0.6375490000  | -1.0054030000 |

|   |               |               |               |
|---|---------------|---------------|---------------|
| H | 5.9167010000  | 2.1860190000  | -0.9442570000 |
| C | -5.7295620000 | 2.3446460000  | -0.7354430000 |
| H | -6.5351500000 | 2.9663240000  | -0.3516220000 |
| O | 2.5655030000  | -3.0615210000 | -0.1205020000 |
| H | 2.9043640000  | -1.9242340000 | -0.1114000000 |
| H | 4.8518310000  | 0.2924100000  | -0.0868690000 |
| C | 2.8410900000  | -0.5055210000 | -0.0548630000 |
| C | 3.7962540000  | 0.5324430000  | -0.0495200000 |
| C | 5.6303380000  | 2.7073900000  | -0.0256990000 |
| I | 0.0051260000  | -1.8647100000 | -0.0118630000 |
| H | 6.0982670000  | 3.6896960000  | -0.0050730000 |
| C | 1.5714820000  | -0.0887430000 | -0.0049660000 |
| C | 3.3769690000  | 1.8691280000  | 0.0056230000  |
| O | 4.2216480000  | 2.9459550000  | 0.0163000000  |
| C | 1.0455150000  | 1.1881360000  | 0.0526350000  |
| C | 2.0083810000  | 2.1930650000  | 0.0557090000  |
| H | -0.0114320000 | 1.4162130000  | 0.0911090000  |
| H | 1.7140290000  | 3.2348520000  | 0.0966280000  |
| C | -1.7431980000 | -0.6196770000 | 0.0989030000  |
| C | -3.9612300000 | 1.0451440000  | 0.2418960000  |
| O | -5.0340900000 | 1.8568360000  | 0.4188460000  |
| H | 5.9597500000  | 2.1278440000  | 0.8421660000  |
| C | -2.2216340000 | -0.2210230000 | 1.3487450000  |
| C | -3.3287190000 | 0.6096790000  | 1.4158620000  |
| H | -1.7375000000 | -0.5474200000 | 2.2599070000  |
| H | -3.7190860000 | 0.9344260000  | 2.3724450000  |

#### TS2-1c (M06-2X, Toluene)

|                  |   |             |
|------------------|---|-------------|
| $E_0 + E_{ZPE}$  | = | -779.022794 |
| $E_0 + E_{tot}$  | = | -779.004493 |
| $E_0 + H_{corr}$ | = | -779.003549 |
| $E_0 + G_{corr}$ | = | -779.071182 |

Frequency: -1107.61

Coordinates:

|   |               |               |               |
|---|---------------|---------------|---------------|
| H | 1.9608530000  | 0.5273550000  | -2.0349950000 |
| H | 3.9312620000  | -0.9234890000 | -1.9078520000 |
| H | 5.0224300000  | -2.8855570000 | -1.3589890000 |
| H | 6.0868250000  | -1.4492840000 | -1.2814660000 |
| C | 2.3232900000  | 0.2090870000  | -1.0648430000 |
| C | 3.4422530000  | -0.6183220000 | -0.9931380000 |
| H | -2.6157830000 | 3.4249490000  | -0.9194110000 |
| H | -5.8370070000 | -2.1640930000 | -0.9067970000 |
| C | 5.6769320000  | -2.2907220000 | -0.7161630000 |
| H | 6.4891190000  | -2.9123660000 | -0.3489910000 |
| O | -2.3657360000 | 3.0145740000  | -0.0867430000 |
| H | -2.8356430000 | 1.8995590000  | -0.0782790000 |
| H | -4.7963100000 | -0.3093580000 | -0.0544820000 |
| C | -2.8034910000 | 0.5122520000  | -0.0470530000 |
| C | -3.7377770000 | -0.5390360000 | -0.0402060000 |
| C | -1.5164400000 | 0.1132050000  | -0.0239530000 |
| I | -0.0509030000 | 1.8503850000  | -0.0163050000 |
| C | -3.3084070000 | -1.8666500000 | -0.0102700000 |
| C | -5.5335800000 | -2.7000210000 | -0.0027740000 |
| O | -4.1398290000 | -2.9445020000 | 0.0013640000  |
| C | -0.9917850000 | -1.1679400000 | 0.0070080000  |
| C | -1.9402950000 | -2.1781960000 | 0.0113190000  |
| H | -6.0104240000 | -3.6771790000 | 0.0179910000  |
| H | 0.0669100000  | -1.3943510000 | 0.0258100000  |
| H | -1.6428500000 | -3.2194250000 | 0.0332020000  |
| C | 1.6813250000  | 0.6137270000  | 0.0950640000  |
| C | 3.9091830000  | -1.0368260000 | 0.2532780000  |
| O | 4.9820030000  | -1.8378540000 | 0.4339410000  |

|   |               |               |              |
|---|---------------|---------------|--------------|
| H | -5.8350730000 | -2.1271740000 | 0.8788970000 |
| C | 2.1470950000  | 0.1972420000  | 1.3426080000 |
| C | 3.2554680000  | -0.6246620000 | 1.4201270000 |
| H | 1.6428010000  | 0.5076140000  | 2.2498290000 |
| H | 3.6366260000  | -0.9641810000 | 2.3751960000 |

#### TS2-1d (B3LYP-D3, CH<sub>2</sub>Cl<sub>2</sub>)

|                  |   |             |
|------------------|---|-------------|
| $E_0 + E_{ZPE}$  | = | -550.377094 |
| $E_0 + E_{tot}$  | = | -550.363404 |
| $E_0 + H_{corr}$ | = | -550.362460 |
| $E_0 + G_{corr}$ | = | -550.420120 |

Frequency: -1249.870

Coordinates:

|   |               |               |               |
|---|---------------|---------------|---------------|
| H | -1.8966520000 | -0.1050080000 | -2.1537320000 |
| H | -3.9889190000 | 1.2150950000  | -2.1372360000 |
| C | -2.3553830000 | 0.1738010000  | -1.2138380000 |
| C | -3.5339490000 | 0.9195120000  | -1.1991920000 |
| O | 2.6528370000  | -2.2933360000 | -0.0560060000 |
| H | 2.9432510000  | -1.1235040000 | -0.0286470000 |
| H | 4.7392560000  | 1.2208130000  | -0.0154160000 |
| C | 2.7907710000  | 0.2648880000  | -0.0145340000 |
| I | 0.0664490000  | -1.3193980000 | -0.0114680000 |
| C | 3.6639370000  | 1.3740200000  | -0.0073660000 |
| C | 1.5010660000  | 0.6072590000  | -0.0050430000 |
| C | -1.7821920000 | -0.1985300000 | -0.0006100000 |
| C | 0.8731910000  | 1.8329610000  | 0.0048590000  |
| C | 3.1535310000  | 2.6744410000  | 0.0071330000  |
| H | -0.1983890000 | 1.9797170000  | 0.0079860000  |
| C | -4.1201540000 | 1.2828380000  | 0.0123700000  |
| C | 1.7737330000  | 2.9063760000  | 0.0127080000  |
| H | 3.8326170000  | 3.5206180000  | 0.0127370000  |
| H | -5.0352620000 | 1.8631120000  | 0.0174630000  |
| H | 1.3847130000  | 3.9182840000  | 0.0234560000  |
| H | 2.8717930000  | -2.6390540000 | 0.8175340000  |
| C | -3.5315620000 | 0.9021320000  | 1.2174210000  |
| C | -2.3529380000 | 0.1563810000  | 1.2189800000  |
| H | -1.8924300000 | -0.1359540000 | 2.1539120000  |
| H | -3.9847790000 | 1.1841790000  | 2.1604760000  |

#### TS2-1d (B3LYP-D3, H<sub>2</sub>O)

|                  |   |             |
|------------------|---|-------------|
| $E_0 + E_{ZPE}$  | = | -550.379793 |
| $E_0 + E_{tot}$  | = | -550.366032 |
| $E_0 + H_{corr}$ | = | -550.365088 |
| $E_0 + G_{corr}$ | = | -550.422998 |

Frequency: -1252.090

Coordinates:

|   |               |               |               |
|---|---------------|---------------|---------------|
| H | -1.9103110000 | -0.1211380000 | -2.1534520000 |
| H | -4.0058110000 | 1.1937120000  | -2.1318480000 |
| C | -2.3644280000 | 0.1617680000  | -1.2127610000 |
| C | -3.5449130000 | 0.9045180000  | -1.1948100000 |
| O | 2.7044460000  | -2.2964180000 | -0.0499830000 |
| H | 2.9589710000  | -1.1230830000 | -0.0156880000 |
| I | 0.0636040000  | -1.3160780000 | -0.0134540000 |
| C | 2.7922580000  | 0.2683800000  | -0.0089310000 |
| C | 1.5006500000  | 0.6068900000  | -0.0078020000 |
| H | -0.2026570000 | 1.9749010000  | -0.0077220000 |
| C | 0.8692690000  | 1.8310670000  | -0.0055810000 |
| H | 4.7369370000  | 1.2330060000  | -0.0030340000 |
| C | 3.6608520000  | 1.3817590000  | -0.0020670000 |
| C | -1.7853980000 | -0.2009550000 | 0.0003000000  |
| C | 1.7657990000  | 2.9078440000  | 0.0021110000  |
| C | 3.1464230000  | 2.6807670000  | 0.0042420000  |
| H | 1.3727360000  | 3.9181420000  | 0.0068680000  |
| H | 3.8226610000  | 3.5291570000  | 0.0099070000  |

|   |               |               |              |
|---|---------------|---------------|--------------|
| C | -4.1248850000 | 1.2729970000  | 0.0182830000 |
| H | -5.0412450000 | 1.8511380000  | 0.0253590000 |
| H | 2.8884320000  | -2.6321620000 | 0.8355470000 |
| C | -2.3482060000 | 0.1577940000  | 1.2221640000 |
| C | -3.5286910000 | 0.9007060000  | 1.2223350000 |
| H | -1.8815930000 | -0.1283710000 | 2.1557450000 |
| H | -3.9770690000 | 1.1869620000  | 2.1663280000 |

**TS2-1d (M06-2X, Toluene)**

|                  |   |             |
|------------------|---|-------------|
| $E_0 + E_{ZPE}$  | = | -550.060434 |
| $E_0 + E_{tot}$  | = | -550.047179 |
| $E_0 + H_{corr}$ | = | -550.046235 |
| $E_0 + G_{corr}$ | = | -550.102493 |

Frequency: -1140.71

Coordinates:

|   |               |               |               |
|---|---------------|---------------|---------------|
| H | -1.8207850000 | -0.0984150000 | -2.1513540000 |
| H | -3.9394100000 | 1.1779820000  | -2.1409350000 |
| C | -2.2938620000 | 0.1632280000  | -1.2126120000 |
| C | -3.4850280000 | 0.8827940000  | -1.2029730000 |
| O | 2.5200570000  | -2.2473420000 | -0.0619640000 |
| H | 2.8976760000  | -1.0918090000 | -0.0380690000 |
| H | 4.6529420000  | 1.3002990000  | -0.0338010000 |
| C | 2.7472540000  | 0.2808470000  | -0.0175140000 |
| C | 3.5740800000  | 1.4196790000  | -0.0148220000 |
| I | 0.1216970000  | -1.3005710000 | -0.0094760000 |
| C | -1.7189360000 | -0.2094240000 | -0.0029530000 |
| C | -4.0868680000 | 1.2215720000  | 0.0044350000  |
| C | 1.4335040000  | 0.5785480000  | 0.0045970000  |
| H | -5.0133650000 | 1.7827150000  | 0.0073390000  |
| C | 3.0327470000  | 2.7018160000  | 0.0083660000  |
| H | 3.6875700000  | 3.5661600000  | 0.0097350000  |
| C | 0.7869370000  | 1.7985030000  | 0.0241400000  |
| C | 1.6505740000  | 2.8933950000  | 0.0277560000  |
| H | -0.2878460000 | 1.9249010000  | 0.0369970000  |
| H | 1.2340390000  | 3.8935120000  | 0.0457750000  |
| H | 2.8305450000  | -2.6676610000 | 0.7451770000  |
| C | -3.5017670000 | 0.8429730000  | 1.2081750000  |
| C | -2.3105070000 | 0.1234840000  | 1.2103110000  |
| H | -1.8510400000 | -0.1695520000 | 2.1466460000  |
| H | -3.9694870000 | 1.1063950000  | 2.1489990000  |

**TS2-1l (M06-2X, Toluene)**

|                  |   |             |
|------------------|---|-------------|
| $E_0 + E_{ZPE}$  | = | -642.303847 |
| $E_0 + E_{tot}$  | = | -642.288834 |
| $E_0 + H_{corr}$ | = | -642.287890 |
| $E_0 + G_{corr}$ | = | -642.348740 |

Frequency: -1182.98

Coordinates:

|   |               |               |               |
|---|---------------|---------------|---------------|
| H | 2.2324520000  | 0.4092110000  | -2.1433690000 |
| H | 3.6240350000  | 2.4542260000  | -2.1403090000 |
| C | 2.5065480000  | 0.8796670000  | -1.2067920000 |
| C | 3.2870890000  | 2.0318740000  | -1.2014540000 |
| H | -1.0233160000 | -3.7693610000 | -0.7269100000 |
| H | -2.2653240000 | 2.8691230000  | -0.0679910000 |
| H | -0.0709100000 | 1.6940620000  | -0.0621060000 |
| C | -2.2244030000 | 1.7876810000  | -0.0413550000 |
| C | -0.9975370000 | 1.1356170000  | -0.0389240000 |
| N | -5.6790010000 | 2.2783240000  | -0.0130340000 |
| C | -4.6685020000 | 1.7279650000  | -0.0109280000 |
| C | -3.4070550000 | 1.0379930000  | -0.0092750000 |
| C | -1.0766800000 | -0.2449100000 | -0.0071320000 |
| H | 4.2390520000  | 3.5329740000  | 0.0024210000  |
| C | 3.6319370000  | 2.6358800000  | 0.0030730000  |
| C | 2.0815720000  | 0.3468060000  | 0.0049090000  |

|   |               |               |              |
|---|---------------|---------------|--------------|
| I | 0.8601830000  | -1.4100330000 | 0.0081190000 |
| C | -3.3833220000 | -0.3600010000 | 0.0250070000 |
| C | -2.1651020000 | -1.0500540000 | 0.0266180000 |
| H | -1.7520100000 | -2.3496320000 | 0.0504900000 |
| H | -4.3244230000 | -0.8987990000 | 0.0529910000 |
| O | -0.9134130000 | -3.2473040000 | 0.0731600000 |
| C | 3.2021370000  | 2.0909750000  | 1.2087410000 |
| C | 2.4227480000  | 0.9381960000  | 1.2159360000 |
| H | 3.4717870000  | 2.5603100000  | 2.1468670000 |
| H | 2.0827060000  | 0.5136960000  | 2.1530230000 |

**TS2-1m (M06-2X, Toluene)**

|                  |   |             |
|------------------|---|-------------|
| $E_0 + E_{ZPE}$  | = | -754.545377 |
| $E_0 + E_{tot}$  | = | -754.529591 |
| $E_0 + H_{corr}$ | = | -754.528647 |
| $E_0 + G_{corr}$ | = | -754.592000 |

Frequency: -1141.78

Coordinates:

|   |               |               |               |
|---|---------------|---------------|---------------|
| H | -0.9679670000 | -0.7046240000 | -2.1466510000 |
| H | -3.3443350000 | 0.0418500000  | -2.1415070000 |
| C | -2.8055330000 | -0.1122670000 | -1.2167320000 |
| C | -1.4806760000 | -0.5296220000 | -1.2090520000 |
| O | -5.3812390000 | 0.7029990000  | -1.0768900000 |
| H | 4.1336270000  | -2.0420780000 | -0.7365530000 |
| H | 1.1120280000  | 3.9923790000  | -0.0436250000 |
| H | 0.0760640000  | 1.7303360000  | -0.0369380000 |
| C | 1.7450860000  | 3.1130880000  | -0.0277800000 |
| C | 1.1512390000  | 1.8509500000  | -0.0246670000 |
| H | 3.5750960000  | 4.2311700000  | -0.0108470000 |
| C | 3.1347950000  | 3.2404440000  | -0.0097330000 |
| C | 2.0638160000  | 0.8162060000  | -0.0064110000 |
| N | -4.8434470000 | 0.5504950000  | -0.0022330000 |
| C | -3.4318400000 | 0.1068430000  | 0.0002370000  |
| C | -0.8253020000 | -0.7152570000 | 0.0045140000  |
| I | 1.2271590000  | -1.3418730000 | 0.0085970000  |
| C | 3.9551540000  | 2.1160890000  | 0.0119890000  |
| C | 3.4062020000  | 0.8198380000  | 0.0146240000  |
| H | 5.0325970000  | 2.2452490000  | 0.0299640000  |
| H | 3.8568670000  | -0.4885810000 | 0.0388120000  |
| O | 3.7331360000  | -1.6946750000 | 0.0659160000  |
| O | -5.3753080000 | 0.7338580000  | 1.0704350000  |
| C | -1.4723580000 | -0.4913740000 | 1.2161290000  |
| C | -2.7970840000 | -0.0734010000 | 1.2192380000  |
| H | -3.3296940000 | 0.1103280000  | 2.1422290000  |
| H | -0.9533020000 | -0.6369110000 | 2.1552680000  |

**TS2-1n (M06-2X, Toluene)**

|                  |   |              |
|------------------|---|--------------|
| $E_0 + E_{ZPE}$  | = | -1469.280224 |
| $E_0 + E_{tot}$  | = | -1469.264565 |
| $E_0 + H_{corr}$ | = | -1469.263621 |
| $E_0 + G_{corr}$ | = | -1469.326520 |

Frequency: -1139.37

Coordinates:

|   |               |               |               |
|---|---------------|---------------|---------------|
| H | 1.8188890000  | -0.5879490000 | -2.1425350000 |
| H | 3.7994280000  | 0.9015800000  | -2.1412030000 |
| C | 3.3370120000  | 0.6027930000  | -1.2093260000 |
| C | 2.2267240000  | -0.2336980000 | -1.2035240000 |
| H | -2.5833940000 | -3.5242040000 | -0.7376820000 |
| H | -1.7249520000 | 3.1690900000  | -0.0591390000 |

|    |               |               |               |   |               |               |               |
|----|---------------|---------------|---------------|---|---------------|---------------|---------------|
| H  | 0.0066850000  | 1.3737240000  | -0.0524780000 | H | -4.1799020000 | -1.3222970000 | -0.5809040000 |
| C  | -2.0150880000 | 2.1265660000  | -0.0359770000 | O | 0.5513260000  | -3.6516450000 | -0.0565850000 |
| C  | -1.0468950000 | 1.1262560000  | -0.0329280000 | H | 0.2853680000  | 1.7150590000  | -0.0301870000 |
| Cl | -4.5620280000 | 3.0446540000  | -0.0110130000 | C | 1.0900930000  | 0.9914850000  | -0.0224680000 |
| C  | -3.3614670000 | 1.7689800000  | -0.0086380000 | I | -1.2706630000 | -1.2016090000 | -0.0197660000 |
| C  | -1.5496400000 | -0.1601930000 | -0.0059840000 | C | 0.8645260000  | -0.3845600000 | -0.0191260000 |
| Cl | 5.2393430000  | 2.1003350000  | -0.0028700000 | H | 1.2439230000  | -2.7606270000 | -0.0169130000 |
| C  | 3.8489460000  | 1.0538400000  | 0.0007180000  | C | 1.8342490000  | -1.3676770000 | -0.0135050000 |
| C  | 1.6503500000  | -0.6034180000 | 0.0061580000  | C | 2.4077520000  | 1.4333260000  | -0.0130530000 |
| I  | -0.0669740000 | -1.8795460000 | 0.0105660000  | H | 2.6461380000  | 2.4874500000  | -0.0125560000 |
| C  | -3.7807300000 | 0.4446940000  | 0.0213380000  | C | 3.1561270000  | -0.8981370000 | -0.0045090000 |
| C  | -2.8314740000 | -0.5875770000 | 0.0232320000  | C | 3.4247090000  | 0.4753080000  | -0.0027490000 |
| H  | -2.8357710000 | -1.9643510000 | 0.0451080000  | O | 5.0338630000  | 2.1556950000  | -0.0025690000 |
| H  | -4.8429910000 | 0.2277280000  | 0.0457900000  | H | 3.9937280000  | -1.5869010000 | -0.0002330000 |
| O  | -2.3197290000 | -3.0668600000 | 0.0662040000  | C | -2.1012120000 | 0.7819950000  | 0.0039690000  |
| C  | 3.2779430000  | 0.6890590000  | 1.2133230000  | N | 4.8165260000  | 0.9420630000  | 0.0087010000  |
| C  | 2.1686650000  | -0.1486100000 | 1.2135170000  | C | -3.1453260000 | 3.3433880000  | 0.0254550000  |
| H  | 3.6946750000  | 1.0544500000  | 2.1431060000  | O | 5.7187910000  | 0.1046010000  | 0.0290380000  |
| H  | 1.7144690000  | -0.4361840000 | 2.1539770000  | H | -3.5546510000 | 4.3467340000  | 0.0343670000  |

### TS2-1o (M06-2X, Toluene)

|                  |   |             |
|------------------|---|-------------|
| $E_0 + E_{ZPE}$  | = | -748.559989 |
| $E_0 + E_{tot}$  | = | -748.545165 |
| $E_0 + H_{corr}$ | = | -748.544221 |
| $E_0 + G_{corr}$ | = | -748.604341 |

Frequency: -1121.60

Coordinates:

|   |               |               |               |
|---|---------------|---------------|---------------|
| H | 1.8641880000  | -0.3998120000 | -2.1397910000 |
| H | 3.9254300000  | 1.0054190000  | -2.1318310000 |
| C | 3.4262100000  | 0.7360310000  | -1.2101070000 |
| C | 2.2780680000  | -0.0475760000 | -1.2028270000 |
| H | -2.6715010000 | -3.1455360000 | -0.7283310000 |
| H | -1.5844230000 | 3.5245000000  | -0.0790320000 |
| H | 0.0982900000  | 1.6592890000  | -0.0691350000 |
| C | -1.8946070000 | 2.4878470000  | -0.0505140000 |
| C | -0.9639350000 | 1.4530740000  | -0.0454140000 |
| F | -4.1313820000 | 3.1861220000  | -0.0213580000 |
| C | -3.2459460000 | 2.1676630000  | -0.0177980000 |
| C | -1.5135620000 | 0.1851790000  | -0.0108710000 |
| F | 5.0404640000  | 1.9296760000  | -0.0020250000 |
| C | 3.9323100000  | 1.1742450000  | 0.0010170000  |
| C | 1.6726030000  | -0.3706230000 | 0.0071010000  |
| I | -0.0895780000 | -1.5799090000 | 0.0140220000  |
| C | -3.7220230000 | 0.8687450000  | 0.0184690000  |
| C | -2.8106940000 | -0.1971870000 | 0.0230700000  |
| H | -4.7942530000 | 0.7065430000  | 0.0456010000  |
| H | -2.8608010000 | -1.5788570000 | 0.0498800000  |
| O | -2.3883380000 | -2.6955530000 | 0.0729870000  |
| C | 2.1972330000  | 0.0805250000  | 1.2142300000  |
| C | 3.3439590000  | 0.8658150000  | 1.2151060000  |
| H | 3.7795390000  | 1.2348040000  | 2.1347610000  |
| H | 1.7184130000  | -0.1713470000 | 2.1525070000  |

### TS3-1a (B3LYP-D3, CH<sub>2</sub>Cl<sub>2</sub>)

|                  |   |             |
|------------------|---|-------------|
| $E_0 + E_{ZPE}$  | = | -830.899261 |
| $E_0 + E_{tot}$  | = | -830.880150 |
| $E_0 + H_{corr}$ | = | -830.879205 |
| $E_0 + G_{corr}$ | = | -830.950415 |

Frequency: -501.620

Coordinates:

|   |               |              |               |
|---|---------------|--------------|---------------|
| H | -2.1584380000 | 0.9206070000 | -2.1473020000 |
| H | -3.0985220000 | 3.2099580000 | -2.1244780000 |
| C | -2.3613540000 | 1.4153520000 | -1.2062820000 |
| C | -2.8899820000 | 2.7065290000 | -1.1876240000 |

### TS3-1a (B3LYP-D3, H<sub>2</sub>O)

|                  |   |             |
|------------------|---|-------------|
| $E_0 + E_{ZPE}$  | = | -830.911375 |
| $E_0 + E_{tot}$  | = | -830.891935 |
| $E_0 + H_{corr}$ | = | -830.890991 |
| $E_0 + G_{corr}$ | = | -830.964546 |

Frequency: -475.440

Coordinates:

|   |               |               |               |
|---|---------------|---------------|---------------|
| H | -2.2010210000 | 0.9235590000  | -2.1428350000 |
| H | -3.1812850000 | 3.1956980000  | -2.0901320000 |
| C | -2.4036390000 | 1.4072040000  | -1.1965020000 |
| C | -2.9563910000 | 2.6871400000  | -1.1600900000 |
| O | -3.6957200000 | -1.8657110000 | -0.1357060000 |
| H | 0.2785270000  | 1.7241640000  | -0.0535870000 |
| H | 2.6361490000  | 2.5081780000  | -0.0460920000 |
| O | 5.0279500000  | 2.1838270000  | -0.0368480000 |
| C | 1.0876670000  | 1.0057910000  | -0.0349440000 |
| C | 2.4036430000  | 1.4529350000  | -0.0312270000 |
| I | -1.2505030000 | -1.1932610000 | -0.0279710000 |
| C | 0.8729150000  | -0.3710700000 | -0.0148400000 |
| C | 3.4241010000  | 0.4989590000  | -0.0075650000 |
| N | 4.8143780000  | 0.9704700000  | -0.0050120000 |
| C | -2.1223540000 | 0.7712550000  | 0.0074400000  |
| C | 1.8428990000  | -1.3523600000 | 0.0076760000  |
| C | 3.1625620000  | -0.8755560000 | 0.0113310000  |
| H | 4.0035820000  | -1.5598280000 | 0.0272450000  |
| O | 5.7193270000  | 0.1360750000  | 0.0285020000  |
| O | 0.6376220000  | -3.6887240000 | 0.0286400000  |
| H | 1.2789960000  | -2.7628490000 | 0.0386560000  |
| C | -3.2165440000 | 3.3066870000  | 0.0618220000  |
| H | -3.6455180000 | 4.3014190000  | 0.0828550000  |
| H | -4.1946430000 | -1.3210260000 | 0.4851350000  |
| H | 0.5626650000  | -3.9698990000 | 0.9477630000  |
| C | -2.3707710000 | 1.3693440000  | 1.2376830000  |
| C | -2.9255700000 | 2.6495770000  | 1.2560820000  |
| H | -2.1398960000 | 0.8586400000  | 2.1633580000  |
| H | -3.1260770000 | 3.1283170000  | 2.2072940000  |



**TS3-1a (M06-2X, CH<sub>2</sub>Cl<sub>2</sub>)**

$E_0 + E_{ZPE} = -830.475392$   
 $E_0 + E_{tot} = -830.456782$   
 $E_0 + H_{corr} = -830.455837$   
 $E_0 + G_{corr} = -830.524713$

Frequency: -907.850

Coordinates:

|   |               |               |               |
|---|---------------|---------------|---------------|
| H | -2.0409650000 | 0.9388640000  | -2.1449950000 |
| H | -2.9554320000 | 3.2380870000  | -2.1141210000 |
| C | -2.2745930000 | 1.4206150000  | -1.2037540000 |
| C | -2.7896660000 | 2.7135700000  | -1.1809410000 |
| H | -3.8335400000 | -2.5086230000 | -0.1092160000 |
| O | -3.6571900000 | -1.5650390000 | -0.0424230000 |
| O | 0.4275650000  | -3.5592520000 | -0.0253950000 |
| I | -1.2501910000 | -1.1948370000 | -0.0203120000 |
| O | 4.9954410000  | 2.1161930000  | -0.0047380000 |
| C | 1.7958100000  | -1.3724770000 | -0.0002480000 |
| H | 3.9533460000  | -1.5989670000 | -0.0000880000 |
| C | -2.0711480000 | 0.7603820000  | -0.0000520000 |
| C | 0.8193340000  | -0.3862670000 | 0.0015750000  |
| C | 3.1167380000  | -0.9091800000 | 0.0024090000  |
| N | 4.7811510000  | 0.9175070000  | 0.0033150000  |
| H | 1.2074780000  | -2.6840200000 | 0.0046890000  |
| C | 3.3837840000  | 0.4571150000  | 0.0053120000  |
| C | 1.0630370000  | 0.9856670000  | 0.0072770000  |
| C | 2.3817150000  | 1.4201810000  | 0.0086710000  |
| O | 5.6647820000  | 0.0818930000  | 0.0095600000  |
| H | 0.2667090000  | 1.7199880000  | 0.0097720000  |
| H | 2.6293930000  | 2.4725510000  | 0.0117490000  |
| C | -3.0916060000 | 3.3252110000  | 0.0316340000  |
| H | -3.4913300000 | 4.3318760000  | 0.0444210000  |
| H | 0.4638100000  | -4.0099560000 | 0.8233820000  |
| C | -2.3694990000 | 1.3521580000  | 1.2189590000  |
| C | -2.8841450000 | 2.6456460000  | 1.2277740000  |
| H | -2.2084150000 | 0.8189940000  | 2.1473780000  |
| H | -3.1223510000 | 3.1189220000  | 2.1726250000  |

**TS3-1a (M06-2X, H<sub>2</sub>O)**

$E_0 + E_{ZPE} = -830.487453$   
 $E_0 + E_{tot} = -830.468685$   
 $E_0 + H_{corr} = -830.467741$   
 $E_0 + G_{corr} = -830.537592$

Frequency: -873.000

Coordinates:

|   |               |               |               |
|---|---------------|---------------|---------------|
| H | -2.0766030000 | 0.9201620000  | -2.1519180000 |
| H | -3.0245310000 | 3.2050460000  | -2.1326810000 |
| C | -2.3019020000 | 1.4094080000  | -1.2124670000 |
| C | -2.8357110000 | 2.6945410000  | -1.1962060000 |
| O | -3.6190950000 | -1.7840600000 | -0.1048110000 |
| O | 0.4398710000  | -3.5668130000 | -0.0449060000 |
| H | 3.9560870000  | -1.5920910000 | -0.0196680000 |
| C | 1.7978390000  | -1.3687610000 | -0.0153960000 |
| H | 1.2065350000  | -2.6898260000 | -0.0130530000 |
| C | 3.1185490000  | -0.9035140000 | -0.0115670000 |
| I | -1.2435740000 | -1.1876420000 | -0.0108480000 |
| C | 0.8233800000  | -0.3812630000 | -0.0043010000 |
| C | -2.0668730000 | 0.7689830000  | -0.0028440000 |
| O | 5.6651230000  | 0.0864990000  | 0.0010180000  |
| C | 3.3842620000  | 0.4627890000  | 0.0017110000  |
| N | 4.7819700000  | 0.9227770000  | 0.0043410000  |
| O | 4.9968680000  | 2.1208790000  | 0.0096160000  |
| C | 1.0637250000  | 0.9909260000  | 0.0097500000  |
| C | 2.3823200000  | 1.4257680000  | 0.0126710000  |
| C | -3.1251840000 | 3.3178880000  | 0.0140730000  |

|   |               |               |              |
|---|---------------|---------------|--------------|
| H | 0.2672660000  | 1.7247120000  | 0.0190180000 |
| H | -3.5399220000 | 4.3183570000  | 0.0206680000 |
| H | 2.6278970000  | 2.4785390000  | 0.0235490000 |
| H | -4.1076040000 | -1.4270470000 | 0.6432040000 |
| H | 0.4695010000  | -4.0073110000 | 0.8097400000 |
| C | -2.3479180000 | 1.3738310000  | 1.2145350000 |
| C | -2.8828860000 | 2.6594800000  | 1.2153620000 |
| H | -2.1554940000 | 0.8596360000  | 2.1481110000 |
| H | -3.1072710000 | 3.1429250000  | 2.1583160000 |

**TS3-1a-Na (M06-2X, CH<sub>2</sub>Cl<sub>2</sub>)**

$E_0 + E_{ZPE} = -992.709334$   
 $E_0 + E_{tot} = -992.688618$   
 $E_0 + H_{corr} = -992.687674$   
 $E_0 + G_{corr} = -992.763017$

Frequency: -893.640

Coordinates:

|    |               |               |               |
|----|---------------|---------------|---------------|
| H  | -2.5706890000 | 3.6430300000  | -2.3538840000 |
| H  | -1.8510120000 | 1.2849600000  | -2.1342080000 |
| C  | -2.4456380000 | 3.2092360000  | -1.3694300000 |
| C  | -2.0418640000 | 1.8829870000  | -1.2521270000 |
| Na | -2.0237750000 | -3.7762670000 | -0.6952310000 |
| H  | -3.0033700000 | 5.0018460000  | -0.3287450000 |
| C  | -2.6881010000 | 3.9704420000  | -0.2302400000 |
| O  | 5.3897180000  | 1.6858990000  | -0.1471770000 |
| O  | 5.7618670000  | -0.4236940000 | -0.1164780000 |
| N  | 5.0117190000  | 0.5314010000  | -0.1021790000 |
| O  | -3.4171170000 | -2.1874390000 | -0.0968570000 |
| H  | 3.1028310000  | 2.3777490000  | -0.0269060000 |
| C  | 3.5612540000  | 0.2748670000  | -0.0248490000 |
| H  | 3.8447410000  | -1.8402900000 | -0.0124390000 |
| C  | 2.7086960000  | 1.3718440000  | 0.0053900000  |
| C  | 3.1129920000  | -1.0415650000 | 0.0163250000  |
| C  | -1.8850040000 | 1.3491720000  | 0.0208010000  |
| C  | 1.3418340000  | 1.1344050000  | 0.0799610000  |
| C  | 1.7431990000  | -1.3202210000 | 0.0904860000  |
| H  | 0.6489880000  | 1.9667030000  | 0.1070720000  |
| C  | 0.9353620000  | -0.1920570000 | 0.1181360000  |
| H  | 0.9568160000  | -2.5220520000 | 0.1497160000  |
| O  | 0.0483890000  | -3.2632440000 | 0.1741020000  |
| I  | -1.2341120000 | -0.6633870000 | 0.2099390000  |
| H  | -4.3024760000 | -2.2005030000 | 0.2716000000  |
| H  | 0.1206690000  | -3.7239260000 | 1.0167230000  |
| C  | -2.5319150000 | 3.4131160000  | 1.0348170000  |
| C  | -2.1266260000 | 2.0886160000  | 1.1714550000  |
| H  | -2.7257970000 | 4.0046610000  | 1.9209610000  |
| H  | -2.0012810000 | 1.6492100000  | 2.1530960000  |

**TS3-1a-Na (M06-2X, H<sub>2</sub>O)**

$E_0 + E_{ZPE} = -992.716216$   
 $E_0 + E_{tot} = -992.695186$   
 $E_0 + H_{corr} = -992.694242$   
 $E_0 + G_{corr} = -992.771164$

Frequency: -859.450

Coordinates:

|    |               |               |               |
|----|---------------|---------------|---------------|
| H  | -2.0594170000 | 3.6880290000  | -2.2734330000 |
| H  | -1.4967640000 | 1.2849140000  | -2.1074390000 |
| C  | -2.0057460000 | 3.2154280000  | -1.3003140000 |
| C  | -1.6912410000 | 1.8624050000  | -1.2121660000 |
| Na | -4.6056060000 | -2.6182750000 | -0.7569420000 |
| H  | -2.4943560000 | 5.0064930000  | -0.2207670000 |

|   |               |               |               |   |               |               |              |
|---|---------------|---------------|---------------|---|---------------|---------------|--------------|
| O | 5.8862430000  | -0.7367520000 | -0.1525110000 | H | 6.0911860000  | 2.0300110000  | 0.8220320000 |
| O | 5.5818880000  | 1.3829750000  | -0.1483710000 | C | -2.0604260000 | 0.1040890000  | 1.3495490000 |
| C | -2.2504300000 | 3.9538660000  | -0.1464600000 | C | -3.0835070000 | 1.0385500000  | 1.4180840000 |
| N | 5.1635770000  | 0.2406630000  | -0.1243880000 | H | -1.6033520000 | -0.2592310000 | 2.2610180000 |
| H | 3.9177360000  | -2.0924050000 | -0.0919620000 | H | -3.4344550000 | 1.4087160000  | 2.3737580000 |
| C | 3.7079850000  | 0.0300290000  | -0.0570880000 |   |               |               |              |
| C | 3.2123310000  | -1.2703450000 | -0.0475850000 |   |               |               |              |
| H | 3.3140590000  | 2.1464330000  | -0.0085850000 |   |               |               |              |
| C | 2.8897850000  | 1.1522610000  | -0.0025810000 |   |               |               |              |
| C | 1.8331100000  | -1.5027560000 | 0.0159650000  |   |               |               |              |
| C | -1.6271560000 | 1.2744250000  | 0.0437320000  |   |               |               |              |
| C | 1.5166970000  | 0.9539710000  | 0.0615960000  |   |               |               |              |
| H | 1.0174320000  | -2.6973670000 | 0.0653030000  |   |               |               |              |
| C | 1.0516860000  | -0.3574580000 | 0.0661170000  |   |               |               |              |
| O | 0.1065290000  | -3.4238570000 | 0.0842960000  |   |               |               |              |
| H | 0.8578490000  | 1.8121780000  | 0.1072270000  |   |               |               |              |
| I | -1.1229930000 | -0.7828030000 | 0.1776410000  |   |               |               |              |
| O | -3.6305930000 | -0.9399570000 | 0.2258620000  |   |               |               |              |
| H | -4.0293080000 | -0.2393180000 | 0.7476620000  |   |               |               |              |
| H | 0.1294860000  | -3.8870170000 | 0.9271090000  |   |               |               |              |
| C | -2.1838080000 | 3.3445700000  | 1.1022550000  |   |               |               |              |
| C | -1.8678470000 | 1.9921390000  | 1.2071950000  |   |               |               |              |
| H | -2.3754490000 | 3.9176890000  | 2.0011160000  |   |               |               |              |
| H | -1.8107120000 | 1.5148420000  | 2.1776750000  |   |               |               |              |

**TS3-1c (B3LYP-D3, CH<sub>2</sub>Cl<sub>2</sub>)**

$E_0 + E_{ZPE} = -855.382716$   
 $E_0 + E_{tot} = -855.361065$   
 $E_0 + H_{corr} = -855.360121$   
 $E_0 + G_{corr} = -855.435496$

Frequency: -1149.000

Coordinates:

|   |               |               |               |
|---|---------------|---------------|---------------|
| H | -1.8859760000 | -0.2488580000 | -2.0272940000 |
| H | -3.6958980000 | 1.3996850000  | -1.9180570000 |
| H | -4.6356430000 | 3.4845030000  | -1.3870870000 |
| H | -5.8340320000 | 2.1589020000  | -1.2973820000 |
| C | -2.2173560000 | 0.1102460000  | -1.0615220000 |
| C | -3.2482450000 | 1.0497620000  | -0.9984370000 |
| H | 2.5967350000  | -3.3656120000 | -0.9933700000 |
| H | 6.0421660000  | 2.0715890000  | -0.9626160000 |
| C | -5.3369330000 | 2.9549470000  | -0.7347450000 |
| H | -6.0816710000 | 3.6538760000  | -0.3595430000 |
| O | 2.4650070000  | -3.0210250000 | -0.1023750000 |
| H | 2.8738930000  | -1.9020940000 | -0.0897070000 |
| H | 4.9001020000  | 0.2412540000  | -0.0809650000 |
| O | -2.0871540000 | -3.3608910000 | -0.0793420000 |
| C | 5.7809990000  | 2.6164930000  | -0.0492360000 |
| C | 3.8522360000  | 0.5195330000  | -0.0443170000 |
| H | 6.2969820000  | 3.5754860000  | -0.0411450000 |
| C | 2.8702400000  | -0.4871180000 | -0.0393690000 |
| O | 4.3893220000  | 2.9195930000  | -0.0038220000 |
| I | -0.0047550000 | -1.7542590000 | -0.0036330000 |
| C | 3.4941260000  | 1.8727040000  | -0.0014740000 |
| C | 1.5632310000  | -0.0623680000 | 0.0099730000  |
| H | -1.7159900000 | -4.2471730000 | 0.0118680000  |
| C | 2.1442950000  | 2.2450040000  | 0.0484780000  |
| C | 1.1540020000  | 1.2660170000  | 0.0558180000  |
| H | 1.8877220000  | 3.2979160000  | 0.0815840000  |
| H | 0.1112380000  | 1.5567700000  | 0.0958820000  |
| C | -1.6296450000 | -0.3552440000 | 0.1055840000  |
| C | -3.6822460000 | 1.5174330000  | 0.2454830000  |
| O | -4.6753780000 | 2.4347830000  | 0.4205840000  |

**TS3-1c (B3LYP-D3, H<sub>2</sub>O)**

$E_0 + E_{ZPE} = -855.396610$   
 $E_0 + E_{tot} = -855.374713$   
 $E_0 + H_{corr} = -855.373768$   
 $E_0 + G_{corr} = -855.450279$

Frequency: -1156.410

Coordinates:

|   |               |               |               |
|---|---------------|---------------|---------------|
| H | -1.8638850000 | -0.2131750000 | -2.0349110000 |
| H | -3.6804500000 | 1.4257290000  | -1.9202580000 |
| H | -4.6237410000 | 3.5048000000  | -1.3636950000 |
| H | -5.8260670000 | 2.1801350000  | -1.3163100000 |
| C | -2.2091560000 | 0.1269940000  | -1.0670670000 |
| H | 2.6279050000  | -3.3664120000 | -1.0084990000 |
| C | -3.2437870000 | 1.0617390000  | -1.0009670000 |
| H | 6.0512980000  | 2.0768110000  | -0.9449130000 |
| C | -5.3356280000 | 2.9646540000  | -0.7327620000 |
| H | -6.0836310000 | 3.6572020000  | -0.3530830000 |
| O | 2.5089500000  | -3.0338040000 | -0.1110110000 |
| H | 2.8888670000  | -1.9095890000 | -0.0993000000 |
| H | 4.9067860000  | 0.2413620000  | -0.0724870000 |
| C | 2.8769550000  | -0.4895710000 | -0.0414110000 |
| C | 3.8586050000  | 0.5183080000  | -0.0394340000 |
| O | -2.1128550000 | -3.3840310000 | -0.0368860000 |
| C | 5.7861860000  | 2.6181740000  | -0.0310370000 |
| H | -1.7306790000 | -4.2702170000 | -0.0300600000 |
| H | 6.2985270000  | 3.5787230000  | -0.0183590000 |
| I | -0.0066660000 | -1.7448600000 | -0.0110550000 |
| C | 1.5724730000  | -0.0623490000 | 0.0026410000  |
| C | 3.4988630000  | 1.8713840000  | 0.0049210000  |
| O | 4.3913600000  | 2.9176430000  | 0.0095030000  |
| C | 2.1476400000  | 2.2424580000  | 0.0489790000  |
| C | 1.1573550000  | 1.2639310000  | 0.0491630000  |
| H | 1.8892810000  | 3.2947720000  | 0.0824760000  |
| H | 0.1142030000  | 1.5531440000  | 0.0840830000  |
| C | -1.6347090000 | -0.3537700000 | 0.1009280000  |
| C | -3.6929570000 | 1.5102070000  | 0.2454160000  |
| O | -4.6895570000 | 2.4195880000  | 0.4228370000  |
| H | 6.0930900000  | 2.0308500000  | 0.8403730000  |
| C | -2.0773000000 | 0.0867090000  | 1.3479220000  |
| C | -3.1045560000 | 1.0162080000  | 1.4178630000  |
| H | -1.6268850000 | -0.2852190000 | 2.2591560000  |
| H | -3.4644180000 | 1.3730330000  | 2.3752200000  |

**TS3-1c (M06-2X, CH<sub>2</sub>Cl<sub>2</sub>)**

$E_0 + E_{ZPE} = -854.939212$   
 $E_0 + E_{tot} = -854.918102$   
 $E_0 + H_{corr} = -854.917158$   
 $E_0 + G_{corr} = -854.991512$

Frequency: -274.100

Coordinates:

|   |               |              |               |
|---|---------------|--------------|---------------|
| H | -1.3826970000 | 0.2336940000 | -1.9790230000 |
| H | -3.2463640000 | 1.8208830000 | -1.8896350000 |
| H | -5.4368960000 | 2.4481490000 | -1.6119930000 |
| H | -4.2903340000 | 3.7107380000 | -1.0764160000 |
| C | -1.9398450000 | 0.3455650000 | -1.0566750000 |

|   |               |               |               |
|---|---------------|---------------|---------------|
| H | 5.7859120000  | 2.2808450000  | -1.0564120000 |
| C | -2.9976900000 | 1.2529690000  | -1.0039120000 |
| C | -5.1188170000 | 3.0671650000  | -0.7690180000 |
| O | 2.6004510000  | -3.0367110000 | -0.4420690000 |
| H | -5.9513960000 | 3.6797360000  | -0.4332170000 |
| H | 2.8804190000  | -1.9465700000 | -0.3792680000 |
| H | 4.8014990000  | 0.3500270000  | -0.3416620000 |
| H | -2.6978410000 | -3.0133870000 | -0.2940090000 |
| C | 2.8054310000  | -0.4533210000 | -0.2116920000 |
| C | 3.7575480000  | 0.5825990000  | -0.1569510000 |
| C | 5.6358760000  | 2.6798420000  | -0.0490670000 |
| I | 0.0297330000  | -1.7324410000 | -0.0313360000 |
| C | 1.5036980000  | -0.0698660000 | 0.0342940000  |
| H | 6.1551390000  | 3.6310360000  | 0.0455910000  |
| C | -1.6052810000 | -0.3922480000 | 0.0651250000  |
| O | -1.8889610000 | -3.3720590000 | 0.0832890000  |
| C | 3.3935220000  | 1.8986930000  | 0.1309390000  |
| C | -3.7107840000 | 1.4077900000  | 0.1837120000  |
| O | 4.2688460000  | 2.9510330000  | 0.1956720000  |
| C | 1.0913610000  | 1.2249830000  | 0.3395030000  |
| O | -4.7500080000 | 2.2636410000  | 0.3412480000  |
| H | 2.9545160000  | -3.4591520000 | 0.3458560000  |
| C | 2.0570900000  | 2.2199710000  | 0.3850930000  |
| H | 0.0572530000  | 1.4793910000  | 0.5434010000  |
| H | 1.7959790000  | 3.2459120000  | 0.6177310000  |
| H | 6.0358710000  | 1.9715310000  | 0.6821820000  |
| C | -2.3180200000 | -0.2488690000 | 1.2522090000  |
| C | -3.3677570000 | 0.6505490000  | 1.3097540000  |
| H | -2.0598930000 | -0.8400040000 | 2.1216950000  |
| H | -3.9376010000 | 0.7844010000  | 2.2209890000  |

#### TS3-1c (M06-2X, H<sub>2</sub>O)

|                  |   |             |
|------------------|---|-------------|
| $E_0 + E_{ZPE}$  | = | -854.953370 |
| $E_0 + E_{tot}$  | = | -854.931989 |
| $E_0 + H_{corr}$ | = | -854.931044 |
| $E_0 + G_{corr}$ | = | -855.006243 |

Frequency: -183.420

Coordinates:

|   |               |               |               |
|---|---------------|---------------|---------------|
| H | -1.5254540000 | 0.1030390000  | -2.0191610000 |
| H | -3.3966560000 | 1.6784070000  | -1.9204720000 |
| H | -5.5903520000 | 2.2850020000  | -1.5404400000 |
| H | -4.4316590000 | 3.6016040000  | -1.1897650000 |
| C | -2.0225190000 | 0.2763790000  | -1.0724480000 |
| H | 5.8429190000  | 2.2236470000  | -1.0557060000 |
| C | -3.0862090000 | 1.1756470000  | -1.0151890000 |
| C | -5.2239070000 | 2.9734580000  | -0.7749680000 |
| H | -6.0409330000 | 3.5994180000  | -0.4265460000 |
| O | 2.5986200000  | -3.0606910000 | -0.3938390000 |
| H | 2.8830190000  | -1.9822150000 | -0.3312030000 |
| H | 4.8291990000  | 0.3175100000  | -0.3039890000 |
| C | 2.8241750000  | -0.4683140000 | -0.1870270000 |
| C | 3.7839950000  | 0.5619200000  | -0.1443830000 |
| H | -2.7702090000 | -2.9745200000 | -0.1321160000 |
| C | 5.6785230000  | 2.6470880000  | -0.0609450000 |
| I | 0.0331260000  | -1.7032970000 | -0.0244520000 |
| H | 6.2019010000  | 3.5969440000  | 0.0205550000  |
| C | 1.5263290000  | -0.0612260000 | 0.0256430000  |
| O | -1.9269590000 | -3.4055140000 | 0.0364970000  |
| C | -1.6094960000 | -0.3765030000 | 0.0761540000  |
| C | 3.4253560000  | 1.8888940000  | 0.0992120000  |
| O | 4.3073320000  | 2.9335440000  | 0.1521230000  |
| C | -3.7255580000 | 1.4081800000  | 0.2026130000  |

|   |               |               |              |
|---|---------------|---------------|--------------|
| C | 1.1117620000  | 1.2430130000  | 0.2809410000 |
| C | 2.0861220000  | 2.2295770000  | 0.3154950000 |
| O | -4.7613710000 | 2.2631690000  | 0.3659930000 |
| H | 2.9443670000  | -3.4827070000 | 0.3983300000 |
| H | 0.0750410000  | 1.5092000000  | 0.4531600000 |
| H | 1.8289300000  | 3.2642210000  | 0.5103840000 |
| H | 6.0593280000  | 1.9544120000  | 0.6946520000 |
| C | -2.2451970000 | -0.1546990000 | 1.2951330000 |
| C | -3.3017670000 | 0.7364160000  | 1.3551590000 |
| H | -1.9222040000 | -0.6720290000 | 2.1898490000 |
| H | -3.8135310000 | 0.9297760000  | 2.2898830000 |

#### TS3-1c-Na (M06-2X, CH<sub>2</sub>Cl<sub>2</sub>)

|                  |   |              |
|------------------|---|--------------|
| $E_0 + E_{ZPE}$  | = | -1017.178413 |
| $E_0 + E_{tot}$  | = | -1017.155196 |
| $E_0 + H_{corr}$ | = | -1017.154252 |
| $E_0 + G_{corr}$ | = | -1017.234210 |

Frequency: -283.790

Coordinates:

|    |               |               |               |
|----|---------------|---------------|---------------|
| H  | 3.8836880000  | -1.1865510000 | -2.0097430000 |
| H  | 1.8168180000  | 0.1255360000  | -1.9584760000 |
| H  | 5.1729210000  | -3.0410910000 | -1.5772260000 |
| H  | 6.1256050000  | -1.5270170000 | -1.5742710000 |
| H  | -5.5648190000 | -2.8862730000 | -1.2091440000 |
| C  | 3.4598600000  | -0.9122490000 | -1.0540280000 |
| C  | 2.2847680000  | -0.1663170000 | -1.0266530000 |
| C  | 5.8332130000  | -2.4009080000 | -0.9869920000 |
| Na | -1.4662480000 | 4.2173480000  | -0.8580550000 |
| H  | 6.7189650000  | -2.9593900000 | -0.6969860000 |
| H  | -5.7858990000 | -4.4119440000 | -0.3172110000 |
| C  | -5.3477410000 | -3.4174000000 | -0.2782050000 |
| H  | -4.7028060000 | -1.0106800000 | -0.2369830000 |
| O  | 0.5739150000  | 4.0398010000  | -0.1207660000 |
| O  | -3.9538470000 | -3.6087400000 | -0.1128130000 |
| C  | -3.6399360000 | -1.1857640000 | -0.1114390000 |
| C  | -3.1652060000 | -2.4976150000 | -0.0360830000 |
| C  | -2.7716780000 | -0.0816660000 | -0.0311770000 |
| H  | -2.9298750000 | 1.4144050000  | -0.0156250000 |
| O  | -2.7091970000 | 2.5181960000  | 0.0450510000  |
| C  | -1.4438900000 | -0.4184580000 | 0.1288420000  |
| C  | -1.7987890000 | -2.7514590000 | 0.1289970000  |
| H  | 1.2206590000  | 4.7017870000  | 0.1303970000  |
| C  | 4.0668400000  | -1.2870910000 | 0.1459560000  |
| H  | -1.4566020000 | -3.7776080000 | 0.1878790000  |
| C  | 1.7285780000  | 0.1929130000  | 0.1906320000  |
| C  | -0.9047390000 | -1.6947810000 | 0.2143130000  |
| I  | -0.0613460000 | 1.3196890000  | 0.2207790000  |
| O  | 5.2056990000  | -2.0071630000 | 0.2259040000  |
| H  | 0.1547030000  | -1.8865980000 | 0.3407060000  |
| H  | -5.7721340000 | -2.8636690000 | 0.5639250000  |
| H  | -3.0489900000 | 2.7949310000  | 0.9024410000  |
| C  | 3.4947510000  | -0.9143700000 | 1.3679150000  |
| C  | 2.3274100000  | -0.1739630000 | 1.3946190000  |
| H  | 3.9844830000  | -1.2148840000 | 2.2857080000  |
| H  | 1.8901290000  | 0.1127220000  | 2.3427270000  |

#### TS3-1c-Na (M06-2X, H<sub>2</sub>O)

|                  |   |              |
|------------------|---|--------------|
| $E_0 + E_{ZPE}$  | = | -1017.183032 |
| $E_0 + E_{tot}$  | = | -1017.159593 |
| $E_0 + H_{corr}$ | = | -1017.158648 |
| $E_0 + G_{corr}$ | = | -1017.240483 |

Frequency: -169.840

Coordinates:

|   |              |               |               |
|---|--------------|---------------|---------------|
| H | 1.6466830000 | -0.4424440000 | -2.0622670000 |
|---|--------------|---------------|---------------|

|    |               |               |               |   |               |               |              |
|----|---------------|---------------|---------------|---|---------------|---------------|--------------|
| H  | 3.2995790000  | -2.2420960000 | -1.8963830000 | C | -3.6724540000 | 2.0564160000  | 0.0217690000 |
| H  | 5.3296360000  | -3.1465310000 | -1.3259410000 | H | -4.4767720000 | 2.7829940000  | 0.0288180000 |
| H  | 4.0061200000  | -4.3458190000 | -1.2290990000 | O | -2.0879200000 | -2.7334960000 | 0.0684380000 |
| C  | 1.9885780000  | -0.7606920000 | -1.0851790000 | H | 2.6731430000  | -2.7908670000 | 0.8276350000 |
| C  | 2.9288090000  | -1.7850280000 | -0.9896230000 | C | -2.0552590000 | 0.7139860000  | 1.2175380000 |
| H  | -6.3371610000 | -1.5341830000 | -0.9388690000 | C | -3.0916370000 | 1.6479550000  | 1.2214190000 |
| C  | 4.8028800000  | -3.8463220000 | -0.6725080000 | H | -1.6016190000 | 0.3985110000  | 2.1483400000 |
| H  | 5.5018250000  | -4.5858380000 | -0.2913250000 | H | -3.4415620000 | 2.0534200000  | 2.1639270000 |
| H  | 3.0680390000  | 2.1375050000  | -0.2179700000 |   |               |               |              |
| O  | -2.2763330000 | 3.1311150000  | -0.1875250000 |   |               |               |              |
| H  | -2.7220370000 | 2.1070740000  | -0.1629350000 |   |               |               |              |
| O  | 2.3226410000  | 2.7379990000  | -0.1484310000 |   |               |               |              |
| H  | -4.9967170000 | 0.1260010000  | -0.1390040000 |   |               |               |              |
| C  | -2.8926250000 | 0.5958150000  | -0.1068950000 |   |               |               |              |
| I  | 0.0624730000  | 1.3759290000  | -0.0873700000 |   |               |               |              |
| C  | -3.9935710000 | -0.2820530000 | -0.0719780000 |   |               |               |              |
| C  | -1.6637910000 | -0.0181160000 | -0.0151940000 |   |               |               |              |
| C  | -6.1743340000 | -2.0649440000 | 0.0031890000  |   |               |               |              |
| C  | -3.8266040000 | -1.6633020000 | 0.0457530000  |   |               |               |              |
| H  | -6.8300320000 | -2.9313290000 | 0.0494220000  |   |               |               |              |
| C  | 1.5030410000  | -0.1629290000 | 0.0653550000  |   |               |               |              |
| O  | -4.8516230000 | -2.5673260000 | 0.0838010000  |   |               |               |              |
| C  | -1.4330550000 | -1.3851210000 | 0.1017190000  |   |               |               |              |
| C  | -2.5440140000 | -2.2152260000 | 0.1334930000  |   |               |               |              |
| H  | -0.4401890000 | -1.8146840000 | 0.1682750000  |   |               |               |              |
| Na | 2.2362710000  | 4.8694090000  | 0.1877090000  |   |               |               |              |
| H  | -2.4356020000 | -3.2896540000 | 0.2246180000  |   |               |               |              |
| C  | 3.3715330000  | -2.1977500000 | 0.2676400000  |   |               |               |              |
| O  | 4.2802250000  | -3.1786890000 | 0.4686050000  |   |               |               |              |
| H  | -2.4575500000 | 3.5273000000  | 0.6700190000  |   |               |               |              |
| H  | -6.3933350000 | -1.3954600000 | 0.8395840000  |   |               |               |              |
| C  | 1.9387090000  | -0.5675560000 | 1.3247480000  |   |               |               |              |
| C  | 2.8720950000  | -1.5840880000 | 1.4221560000  |   |               |               |              |
| H  | 1.5559740000  | -0.0981410000 | 2.2223780000  |   |               |               |              |
| H  | 3.2295080000  | -1.9203820000 | 2.3876450000  |   |               |               |              |

**TS3-1d (B3LYP-D3, CH<sub>2</sub>Cl<sub>2</sub>)**

|                  |   |             |
|------------------|---|-------------|
| $E_0 + E_{ZPE}$  | = | -626.322537 |
| $E_0 + E_{tot}$  | = | -626.306149 |
| $E_0 + H_{corr}$ | = | -626.305205 |
| $E_0 + G_{corr}$ | = | -626.368318 |

Frequency: -1192.740

Coordinates:

|   |               |               |               |
|---|---------------|---------------|---------------|
| H | -1.8337980000 | 0.1824000000  | -2.1390470000 |
| H | -3.6718710000 | 1.8399810000  | -2.1219780000 |
| C | -2.1852800000 | 0.5934900000  | -1.2014870000 |
| C | -3.2208820000 | 1.5281150000  | -1.1868250000 |
| H | 0.0888440000  | 2.1217890000  | -0.0576790000 |
| O | 2.5111920000  | -2.4088140000 | -0.0429420000 |
| C | 1.1380140000  | 1.8544250000  | -0.0400700000 |
| H | 1.8201080000  | 3.8956360000  | -0.0376200000 |
| C | 2.1185180000  | 2.8522530000  | -0.0291460000 |
| C | 1.5783570000  | 0.5375230000  | -0.0256800000 |
| H | 2.9115240000  | -1.2718230000 | -0.0188270000 |
| I | 0.0290910000  | -1.1929540000 | -0.0146410000 |
| C | 2.8918410000  | 0.1248280000  | -0.0109440000 |
| C | 3.4698020000  | 2.5020930000  | -0.0081060000 |
| C | 3.8468620000  | 1.1557930000  | -0.0017710000 |
| H | 4.2261400000  | 3.2817050000  | 0.0006630000  |
| C | -1.6144880000 | 0.1991880000  | 0.0033620000  |
| H | 4.9073360000  | 0.9105530000  | 0.0084150000  |
| H | -1.7498500000 | -3.6356460000 | 0.0089850000  |

**TS3-1d (B3LYP-D3, H<sub>2</sub>O)**

|                  |   |             |
|------------------|---|-------------|
| $E_0 + E_{ZPE}$  | = | -626.335779 |
| $E_0 + E_{tot}$  | = | -626.318987 |
| $E_0 + H_{corr}$ | = | -626.318043 |
| $E_0 + G_{corr}$ | = | -626.383078 |

Frequency: -1205.870

Coordinates:

|   |               |               |               |
|---|---------------|---------------|---------------|
| H | -1.7977200000 | 0.2376270000  | -2.1457380000 |
| H | -3.6498690000 | 1.8791700000  | -2.1247700000 |
| C | -2.1715530000 | 0.6223520000  | -1.2056790000 |
| C | -3.2147760000 | 1.5487630000  | -1.1887010000 |
| O | 2.5517670000  | -2.4236000000 | -0.0414050000 |
| H | 0.0996950000  | 2.1231260000  | -0.0388250000 |
| C | 1.1484980000  | 1.8545950000  | -0.0276540000 |
| H | 1.8358420000  | 3.8932040000  | -0.0235160000 |
| C | 2.1321240000  | 2.8495140000  | -0.0193100000 |
| C | 1.5914560000  | 0.5391610000  | -0.0191240000 |
| I | 0.0246370000  | -1.1788900000 | -0.0139350000 |
| H | 2.9245940000  | -1.2822150000 | -0.0111770000 |
| C | 2.9006560000  | 0.1190110000  | -0.0100330000 |
| C | 3.4828520000  | 2.4959390000  | -0.0055540000 |
| C | 3.8579580000  | 1.1491030000  | -0.0027040000 |
| H | 4.2405600000  | 3.2737770000  | 0.0012570000  |
| C | -1.6225020000 | 0.2065360000  | 0.0024260000  |
| H | 4.9178710000  | 0.9021900000  | 0.0041300000  |
| C | -3.6919030000 | 2.0468130000  | 0.0229950000  |
| H | -1.7322240000 | -3.6763600000 | 0.0291780000  |
| O | -2.0998220000 | -2.7839430000 | 0.0300230000  |
| H | -4.5010610000 | 2.7676490000  | 0.0309380000  |
| H | 2.6943480000  | -2.7961870000 | 0.8368050000  |
| C | -2.0856590000 | 0.6921440000  | 1.2206260000  |
| C | -3.1290720000 | 1.6184090000  | 1.2244550000  |
| H | -1.6446230000 | 0.3622700000  | 2.1524400000  |
| H | -3.4972230000 | 2.0032290000  | 2.1684290000  |

**TS3-1d (M06-2X, Toluene)**

|                  |   |             |
|------------------|---|-------------|
| $E_0 + E_{ZPE}$  | = | -625.943884 |
| $E_0 + E_{tot}$  | = | -625.927915 |
| $E_0 + H_{corr}$ | = | -625.926971 |
| $E_0 + G_{corr}$ | = | -625.988516 |

Frequency: -807.170

Coordinates:

|   |               |               |               |
|---|---------------|---------------|---------------|
| H | -2.7815430000 | -0.8239940000 | -1.3407810000 |
| H | -4.6463950000 | 0.8360310000  | -1.2356210000 |
| H | 1.9562020000  | 3.6859160000  | -1.0874430000 |
| H | 0.1878160000  | 1.9626540000  | -0.9708190000 |
| C | -2.7218400000 | 0.0538360000  | -0.7112850000 |
| C | 2.1855100000  | 2.7034950000  | -0.6886680000 |
| C | 1.1883430000  | 1.7336220000  | -0.6200690000 |
| C | -3.7651050000 | 0.9709640000  | -0.6194030000 |
| H | 4.2516020000  | 3.1529750000  | -0.3050360000 |
| C | 3.4729730000  | 2.3974160000  | -0.2525390000 |
| O | -1.9934950000 | -2.5868100000 | -0.2025220000 |
| H | 3.0761270000  | -2.8509770000 | -0.2021060000 |
| C | 1.5258340000  | 0.4880170000  | -0.1003190000 |

|   |               |               |               |
|---|---------------|---------------|---------------|
| I | 0.0158670000  | -1.1516570000 | -0.0311290000 |
| H | -1.6992930000 | -3.4832450000 | -0.0185910000 |
| C | -1.6021170000 | 0.2408170000  | 0.0843020000  |
| C | 3.7613290000  | 1.1212860000  | 0.2269200000  |
| C | -3.6877420000 | 2.0431910000  | 0.2639850000  |
| C | 2.7898930000  | 0.1087330000  | 0.3155420000  |
| H | -4.5058980000 | 2.7508330000  | 0.3321760000  |
| O | 2.5450060000  | -2.4557150000 | 0.4943420000  |
| H | 2.8361350000  | -1.3255850000 | 0.5224960000  |
| H | 4.7831150000  | 0.9088600000  | 0.5369220000  |
| C | -1.5118150000 | 1.2930740000  | 0.9842310000  |
| C | -2.5649070000 | 2.1998030000  | 1.0693950000  |
| H | -0.6298650000 | 1.4143620000  | 1.6020480000  |
| H | -2.5032110000 | 3.0246930000  | 1.7694680000  |

**TS4-1a (B3LYP-D3, CH<sub>2</sub>Cl<sub>2</sub>)**

|                  |   |             |
|------------------|---|-------------|
| $E_0 + E_{ZPE}$  | = | -754.944523 |
| $E_0 + E_{tot}$  | = | -754.928699 |
| $E_0 + H_{corr}$ | = | -754.927755 |
| $E_0 + G_{corr}$ | = | -754.990968 |

Frequency: -304.380

Coordinates:

|   |               |               |               |
|---|---------------|---------------|---------------|
| H | -0.7458320000 | -0.7701690000 | -2.1701870000 |
| H | -2.9312620000 | 0.3945710000  | -2.1486820000 |
| H | 2.2369680000  | 0.7927830000  | -2.1450470000 |
| H | 2.9896390000  | 3.1500240000  | -2.1408820000 |
| C | -1.2364510000 | -0.5458410000 | -1.2340870000 |
| C | -2.4587160000 | 0.1007160000  | -1.2219290000 |
| C | 2.4017400000  | 1.3086460000  | -1.2076310000 |
| C | 2.8258920000  | 2.6372170000  | -1.2004330000 |
| O | -4.8575470000 | 1.3934290000  | -1.0742160000 |
| O | -0.3941150000 | -3.0679530000 | -0.1592850000 |
| C | -0.6728470000 | -0.9367100000 | -0.0144730000 |
| C | -3.0809550000 | 0.3795390000  | -0.0007200000 |
| I | 1.4923930000  | -1.3951870000 | 0.0060700000  |
| N | -4.3583830000 | 1.0686550000  | 0.0061210000  |
| H | 3.3657290000  | 4.3318720000  | 0.0074420000  |
| C | 3.0363950000  | 3.2995920000  | 0.0081690000  |
| C | 2.1982030000  | 0.6659190000  | 0.0101480000  |
| H | -0.7292620000 | -3.4305050000 | 0.6719670000  |
| O | -4.8955180000 | 1.3011950000  | 1.0922280000  |
| C | -1.2604690000 | -0.6143380000 | 1.2142010000  |
| C | -2.4857070000 | 0.0288180000  | 1.2145220000  |
| C | 2.8243370000  | 2.6393800000  | 1.2177180000  |
| C | 2.3994920000  | 1.3110130000  | 1.2268940000  |
| H | -2.9757710000 | 0.2713440000  | 2.1469850000  |
| H | -0.7860800000 | -0.8837670000 | 2.1474210000  |
| H | 2.9869500000  | 3.1540340000  | 2.1573570000  |
| H | 2.2327440000  | 0.7970820000  | 2.1649860000  |

**TS4-1a (B3LYP-D3, H<sub>2</sub>O)**

|                  |   |             |
|------------------|---|-------------|
| $E_0 + E_{ZPE}$  | = | -754.948781 |
| $E_0 + E_{tot}$  | = | -754.932943 |
| $E_0 + H_{corr}$ | = | -754.931999 |
| $E_0 + G_{corr}$ | = | -754.995271 |

Frequency: -306.470

Coordinates:

|   |               |               |               |
|---|---------------|---------------|---------------|
| H | -2.2313490000 | 0.7894390000  | -2.1657550000 |
| H | -2.9893480000 | 3.1454950000  | -2.1610340000 |
| H | 2.9708440000  | 0.2705650000  | -2.1480320000 |
| H | 0.7861730000  | -0.8887940000 | -2.1475020000 |

|   |               |               |               |
|---|---------------|---------------|---------------|
| C | -2.3987160000 | 1.3048580000  | -1.2287700000 |
| C | -2.8253030000 | 2.6327930000  | -1.2206620000 |
| C | 2.4826330000  | 0.0279520000  | -1.2146810000 |
| C | 1.2600600000  | -0.6189640000 | -1.2142420000 |
| O | 4.8885460000  | 1.3091960000  | -1.0922960000 |
| H | 0.7509700000  | -3.4047670000 | -0.6958510000 |
| H | -3.3691500000 | 4.3260350000  | -0.0125630000 |
| C | -3.0378230000 | 3.2944150000  | -0.0117860000 |
| C | -2.1965220000 | 0.6641110000  | -0.0099600000 |
| N | 4.3504560000  | 1.0728810000  | -0.0061810000 |
| I | -1.4932600000 | -1.3942530000 | -0.0036570000 |
| C | 3.0769400000  | 0.3827250000  | 0.0008690000  |
| C | 0.6724710000  | -0.9427450000 | 0.0151210000  |
| O | 0.4304110000  | -3.0735000000 | 0.1541330000  |
| O | 4.8528310000  | 1.3975450000  | 1.0741670000  |
| C | -2.8257460000 | 2.6345490000  | 1.1980790000  |
| C | -2.3998770000 | 1.3064320000  | 1.2079620000  |
| C | 2.4526390000  | 0.1065560000  | 1.2225330000  |
| C | 1.2328090000  | -0.5435380000 | 1.2347930000  |
| H | -2.9900040000 | 3.1484400000  | 2.1377740000  |
| H | -2.2337950000 | 0.7921070000  | 2.1457940000  |
| H | 2.9203810000  | 0.4068500000  | 2.1496060000  |
| H | 0.7391300000  | -0.7608920000 | 2.1710660000  |

**TS4-1a (M06-2X, Toluene)**

|                  |   |             |
|------------------|---|-------------|
| $E_0 + E_{ZPE}$  | = | -754.541526 |
| $E_0 + E_{tot}$  | = | -754.525854 |
| $E_0 + H_{corr}$ | = | -754.524909 |
| $E_0 + G_{corr}$ | = | -754.587913 |

Frequency: -391.86

Coordinates:

|   |               |               |               |
|---|---------------|---------------|---------------|
| H | 2.9811380000  | 3.1189410000  | -2.1602930000 |
| H | -0.7574180000 | -0.8458660000 | -2.1558210000 |
| H | 2.2155910000  | 0.7695920000  | -2.1505300000 |
| H | -2.9624000000 | 0.3031940000  | -2.1424640000 |
| C | -1.2347580000 | -0.5802260000 | -1.2231020000 |
| C | 2.8094520000  | 2.6141320000  | -1.2174790000 |
| C | -2.4648230000 | 0.0491790000  | -1.2163580000 |
| C | 2.3768840000  | 1.2918300000  | -1.2150160000 |
| O | -4.8584570000 | 1.3138230000  | -1.0726910000 |
| O | -0.3048070000 | -2.9926000000 | -0.1253100000 |
| H | 3.3569230000  | 4.3116610000  | -0.0225340000 |
| C | 3.0191660000  | 3.2825510000  | -0.0158080000 |
| C | -0.6508310000 | -0.9205000000 | -0.0013010000 |
| C | -3.0632120000 | 0.3625400000  | 0.0000270000  |
| N | -4.3542640000 | 1.0451620000  | 0.0006340000  |
| C | 2.1630020000  | 0.6540880000  | 0.0013300000  |
| I | 1.4795540000  | -1.3835310000 | 0.0139120000  |
| H | -0.6848360000 | -3.5055810000 | 0.5962380000  |
| O | -4.8593250000 | 1.3106100000  | 1.0747640000  |
| C | 2.7958240000  | 2.6345560000  | 1.1945250000  |
| C | 2.3625880000  | 1.3126210000  | 1.2090420000  |
| C | -2.4552640000 | 0.0700980000  | 1.2147570000  |
| C | -1.2215750000 | -0.5566640000 | 1.2196580000  |
| H | 2.9571950000  | 3.1549320000  | 2.1306540000  |
| H | -2.9405290000 | 0.3464300000  | 2.1410170000  |
| H | 2.1901770000  | 0.8061080000  | 2.1512210000  |
| H | -0.7303440000 | -0.7882960000 | 2.1549940000  |

**TS4-1c (B3LYP-D3, CH<sub>2</sub>Cl<sub>2</sub>)**

|                  |   |             |
|------------------|---|-------------|
| $E_0 + E_{ZPE}$  | = | -779.429641 |
| $E_0 + E_{tot}$  | = | -779.410978 |
| $E_0 + H_{corr}$ | = | -779.410033 |

$\epsilon_0 + G_{\text{corr}} = -779.479248$   
 Frequency: -358.380  
 Coordinates:  
 H 3.4264960000 1.0393750000 -2.3892710000  
 H 1.5837310000 -0.6138780000 -2.2885060000  
 H -1.9534940000 -0.3611060000 -2.0292970000  
 H -3.0846490000 1.8126440000 -1.8903070000  
 C 3.0651380000 0.6739230000 -1.4357970000  
 C 2.0350870000 -0.2515400000 -1.3734260000  
 H -3.2766150000 4.0843600000 -1.3250390000  
 H -4.8538760000 3.2431830000 -1.2599840000  
 C -2.1511700000 0.0790660000 -1.0619520000  
 C -2.8001390000 1.3153060000 -0.9732230000  
 C -4.1210220000 3.8154360000 -0.6817600000  
 O 4.6580040000 2.0574980000 -0.4300920000  
 H -4.5884340000 4.7219160000 -0.3019480000  
 C 3.6569470000 1.1547320000 -0.2589940000  
 C 1.5938750000 -0.7074520000 -0.1288530000  
 I -0.0572680000 -2.1005330000 -0.0265630000  
 O -2.5912030000 -2.5853130000 -0.0012750000  
 C -1.7997120000 -0.5684650000 0.1072300000  
 C -3.0650840000 1.8831130000 0.2752030000  
 H 6.0657730000 3.2755150000 0.3499770000  
 O -3.6868240000 3.0888780000 0.4670010000  
 C 5.3126450000 2.5872080000 0.7270720000  
 H -3.0085660000 -2.7291010000 0.8587120000  
 C 3.2050800000 0.6997920000 0.9847050000  
 C 2.1679180000 -0.2312960000 1.0439580000  
 H 5.7978370000 1.7932880000 1.3025120000  
 C -2.0245570000 -0.0190930000 1.3636080000  
 H 4.6080140000 3.1292800000 1.3645250000  
 C -2.6729390000 1.2084840000 1.4368560000  
 H 3.6426570000 1.0571240000 1.9062280000  
 H 1.8208540000 -0.5756700000 2.0101960000  
 H -1.7224290000 -0.5326390000 2.2661970000  
 H -2.8743350000 1.6601930000 2.4009920000

**TS4-1c (B3LYP-D3, H<sub>2</sub>O)**

$\epsilon_0 + \epsilon_{\text{ZPE}} = -779.433699$   
 $\epsilon_0 + E_{\text{tot}} = -779.415011$   
 $\epsilon_0 + H_{\text{corr}} = -779.414067$   
 $\epsilon_0 + G_{\text{corr}} = -779.483444$

Frequency: -364.90  
 Coordinates:  
 H 3.3950080000 1.0589350000 -2.3868720000  
 H 1.5542990000 -0.5955720000 -2.2915030000  
 H -1.9513210000 -0.3540850000 -2.0291470000  
 H -3.0514430000 1.8342080000 -1.8880570000  
 C 3.0424780000 0.6820170000 -1.4345580000  
 C 2.0131400000 -0.2445940000 -1.3759380000  
 H -3.1956000000 4.1097240000 -1.3116270000  
 H -4.7902710000 3.3009620000 -1.2680500000  
 C -2.1499030000 0.0832650000 -1.0605830000  
 C -2.7802180000 1.3294450000 -0.9710360000  
 C -4.0522400000 3.8551390000 -0.6793220000  
 O 4.6435670000 2.0527070000 -0.4241660000  
 H -4.5049940000 4.7686280000 -0.2988410000  
 C 3.6442820000 1.1478490000 -0.2565100000  
 C 1.5837920000 -0.7149290000 -0.1326430000  
 I -0.0622160000 -2.1077580000 -0.0335280000  
 O -2.6366010000 -2.5713220000 0.0114960000  
 C -1.8126230000 -0.5725770000 0.1084270000  
 C -3.0404640000 1.8980540000 0.2781340000

H 6.0594690000 3.2599500000 0.3602280000  
 O -3.6444870000 3.1126190000 0.4706930000  
 C 5.3093750000 2.5673320000 0.7352340000  
 H -3.0123150000 -2.6937280000 0.8938010000  
 C 3.2032260000 0.6770500000 0.9854250000  
 C 2.1668960000 -0.2549130000 1.0423300000  
 H 5.7985550000 1.7653590000 1.2953710000  
 C -2.0320400000 -0.0229200000 1.3657460000  
 H 4.6103490000 3.1010600000 1.3853240000  
 C -2.6618600000 1.2145520000 1.4394770000  
 H 3.6488220000 1.0221560000 1.9076540000  
 H 1.8288650000 -0.6123510000 2.0068070000  
 H -1.7375990000 -0.5414570000 2.2679140000  
 H -2.8572630000 1.6667540000 2.4046760000

**TS4-1c (M06-2X, Toluene)**

$\epsilon_0 + \epsilon_{\text{ZPE}} = -779.007349$   
 $\epsilon_0 + E_{\text{tot}} = -778.989118$   
 $\epsilon_0 + H_{\text{corr}} = -778.988174$   
 $\epsilon_0 + G_{\text{corr}} = -779.055916$

Frequency: -430.89  
 Coordinates:  
 H 3.3470310000 1.0579060000 -2.3889320000  
 H 1.5053220000 -0.6000190000 -2.2818430000  
 H -1.8880170000 -0.3454850000 -2.0248020000  
 H -3.0157430000 1.8282680000 -1.8767310000  
 C 2.9956230000 0.6782570000 -1.4374550000  
 C 1.9694560000 -0.2455570000 -1.3692360000  
 H -3.2152500000 4.0518980000 -1.3162350000  
 H -4.7785960000 3.1890770000 -1.2402400000  
 C -2.0775970000 0.0960950000 -1.0558280000  
 C -2.7293550000 1.3271460000 -0.9619220000  
 C -4.0571770000 3.7830370000 -0.6705770000  
 O 4.5950610000 2.0466140000 -0.4381390000  
 H -4.5383370000 4.6890430000 -0.3096140000  
 C 3.6024010000 1.1442990000 -0.2663640000  
 C 1.5433410000 -0.7161840000 -0.1269770000  
 O -2.5011700000 -2.5158430000 -0.0261740000  
 I -0.0853330000 -2.0941580000 -0.0206550000  
 C -1.7334500000 -0.5682650000 0.1058770000  
 C -2.9952600000 1.8873960000 0.2841040000  
 H 5.9979870000 3.2447950000 0.3575820000  
 O -3.6175250000 3.0866840000 0.4776020000  
 H -3.1193170000 -2.7459340000 0.6762300000  
 C 5.2496140000 2.5433370000 0.7168870000  
 C 3.1723660000 0.6767450000 0.9753690000  
 C 2.1365080000 -0.2528630000 1.0370340000  
 H 5.7393480000 1.7348290000 1.2667300000  
 C -1.9505160000 -0.0097880000 1.3614270000  
 H 4.5458210000 3.0633950000 1.3725170000  
 C -2.5998930000 1.2116640000 1.4393740000  
 H 3.6235310000 1.0242910000 1.8943640000  
 H 1.8030290000 -0.6092020000 2.0045400000  
 H -1.6505250000 -0.5293740000 2.2620350000  
 H -2.8009100000 1.6653110000 2.4025300000

**TS4-1d (B3LYP-D3, CH<sub>2</sub>Cl<sub>2</sub>)**

$\epsilon_0 + \epsilon_{\text{ZPE}} = -550.371368$   
 $\epsilon_0 + E_{\text{tot}} = -550.357931$   
 $\epsilon_0 + H_{\text{corr}} = -550.356987$   
 $\epsilon_0 + G_{\text{corr}} = -550.414342$

Frequency: -353.030  
 Coordinates:  
 H -2.6662720000 2.5697420000 -2.1785220000

|   |               |               |               |
|---|---------------|---------------|---------------|
| H | -1.6389900000 | 0.3190250000  | -2.1722830000 |
| H | 3.8406430000  | 1.3594930000  | -2.1479080000 |
| H | 1.9027210000  | -0.1781590000 | -2.1355740000 |
| C | -1.8832650000 | 0.8129050000  | -1.2423800000 |
| C | -2.4667260000 | 2.0801840000  | -1.2317050000 |
| C | 3.3842640000  | 1.0786560000  | -1.2058420000 |
| C | 2.2924380000  | 0.2106580000  | -1.2032190000 |
| O | -2.5644360000 | -1.7709830000 | -0.1326290000 |
| H | -3.2352440000 | 3.6984770000  | -0.0353170000 |
| C | -2.7876290000 | 2.7121620000  | -0.0302540000 |
| C | -1.6562240000 | 0.1987630000  | -0.0192730000 |
| H | 4.7297270000  | 2.2585750000  | -0.0130400000 |
| C | 3.8823250000  | 1.5831390000  | -0.0053690000 |
| C | 1.7180050000  | -0.1449710000 | 0.0145630000  |
| I | -0.0280470000 | -1.4417670000 | 0.0227280000  |
| H | -3.0425970000 | -1.8682890000 | 0.7018130000  |
| C | -2.5176640000 | 2.0698880000  | 1.1769840000  |
| C | -1.9308740000 | 0.8028070000  | 1.1995960000  |
| C | 3.2920470000  | 1.2217320000  | 1.2049210000  |
| C | 2.2006930000  | 0.3533880000  | 1.2220900000  |
| H | -2.7529600000 | 2.5516280000  | 2.1195740000  |
| H | -1.7168570000 | 0.3068420000  | 2.1363650000  |
| H | 3.6768480000  | 1.6142190000  | 2.1390390000  |
| H | 1.7405990000  | 0.0741160000  | 2.1615980000  |

#### TS4-1d (B3LYP-D3, H<sub>2</sub>O)

|                  |   |             |
|------------------|---|-------------|
| $E_0 + E_{ZPE}$  | = | -550.374835 |
| $E_0 + E_{tot}$  | = | -550.361335 |
| $E_0 + H_{corr}$ | = | -550.360391 |
| $E_0 + G_{corr}$ | = | -550.418094 |

Frequency: -360.050

Coordinates:

|   |               |               |               |
|---|---------------|---------------|---------------|
| H | -1.6322990000 | 0.3383920000  | -2.1689340000 |
| H | -2.6227610000 | 2.6052680000  | -2.1580710000 |
| H | 1.8532370000  | -0.1173930000 | -2.1450960000 |
| H | 3.7865410000  | 1.4266820000  | -2.1434680000 |
| C | -1.8734770000 | 0.8265620000  | -1.2350910000 |
| C | -2.4349590000 | 2.1041120000  | -1.2149400000 |
| C | 2.2600300000  | 0.2420450000  | -1.2084720000 |
| C | 3.3491650000  | 1.1136050000  | -1.2026480000 |
| O | -2.6086690000 | -1.7446060000 | -0.1263220000 |
| C | -1.6587540000 | 0.1990270000  | -0.0160620000 |
| C | -2.7459270000 | 2.7322070000  | -0.0086860000 |
| H | -3.1753340000 | 3.7265710000  | -0.0062610000 |
| H | 4.7146720000  | 2.2571840000  | 0.0026250000  |
| C | 3.8690730000  | 1.5795440000  | 0.0043240000  |
| C | 1.7115520000  | -0.1536940000 | 0.0088510000  |
| I | -0.0294610000 | -1.4498380000 | 0.0095940000  |
| H | -3.0513640000 | -1.8212940000 | 0.7296530000  |
| C | -2.4871370000 | 2.0761750000  | 1.1940110000  |
| C | -1.9226040000 | 0.7987230000  | 1.2075910000  |
| C | 3.3035070000  | 1.1766530000  | 1.2134810000  |
| C | 2.2143430000  | 0.3052460000  | 1.2237220000  |
| H | -2.7132020000 | 2.5550450000  | 2.1402680000  |
| H | -1.7151290000 | 0.2931500000  | 2.1406930000  |
| H | 3.7054210000  | 1.5389040000  | 2.1524790000  |
| H | 1.7721510000  | -0.0055040000 | 2.1617140000  |

#### TS4-1d (M06-2X, Toluene)

|                  |   |             |
|------------------|---|-------------|
| $E_0 + E_{ZPE}$  | = | -550.048331 |
| $E_0 + E_{tot}$  | = | -550.035107 |
| $E_0 + H_{corr}$ | = | -550.034163 |
| $E_0 + G_{corr}$ | = | -550.090652 |

Frequency: -424.580

Coordinates:

|   |               |               |               |
|---|---------------|---------------|---------------|
| H | 2.5872670000  | 2.3724310000  | -2.3907430000 |
| H | 1.4614400000  | 0.1826660000  | -2.2150540000 |
| H | -4.3621640000 | 0.6347830000  | -1.8528030000 |
| H | -2.4204630000 | -0.8918740000 | -1.7951320000 |
| C | 2.4256150000  | 1.9378090000  | -1.4108360000 |
| C | 1.7851100000  | 0.7041170000  | -1.3240700000 |
| C | -3.6605230000 | 0.6893440000  | -1.0292660000 |
| C | -2.5691030000 | -0.1734860000 | -0.9976630000 |
| H | 3.0013820000  | -2.0165290000 | -0.6054170000 |
| H | 3.3256550000  | 3.5758490000  | -0.3488430000 |
| C | 2.8369300000  | 2.6134070000  | -0.2680770000 |
| C | 1.6087690000  | 0.1500480000  | -0.0633680000 |
| H | -4.6907360000 | 2.2949690000  | -0.0439220000 |
| C | -3.8428240000 | 1.6216140000  | -0.0137710000 |
| C | -1.6789560000 | -0.1017210000 | 0.0670750000  |
| I | 0.0190910000  | -1.4166480000 | 0.1031340000  |
| O | 2.4305620000  | -1.7750680000 | 0.1323540000  |
| C | 2.6027700000  | 2.0456430000  | 0.9815430000  |
| C | -2.9375700000 | 1.6924510000  | 1.0399900000  |
| C | -1.8502220000 | 0.8255730000  | 1.0882850000  |
| C | 1.9703670000  | 0.8138750000  | 1.1021590000  |
| H | -3.0767230000 | 2.4203840000  | 1.8301230000  |
| H | 2.9142690000  | 2.5620500000  | 1.8822140000  |
| H | -1.1486690000 | 0.8774960000  | 1.9125510000  |
| H | 1.8102290000  | 0.3586020000  | 2.0701060000  |

#### TS4-1l (M06-2X, Toluene)

|                  |   |             |
|------------------|---|-------------|
| $E_0 + E_{ZPE}$  | = | -642.294248 |
| $E_0 + E_{tot}$  | = | -642.279179 |
| $E_0 + H_{corr}$ | = | -642.278235 |
| $E_0 + G_{corr}$ | = | -642.339843 |

Frequency: -392.26

Coordinates:

|   |               |               |               |
|---|---------------|---------------|---------------|
| H | -1.8675640000 | 0.7312530000  | -2.1571010000 |
| H | 1.1156330000  | -0.6565670000 | -2.1479100000 |
| H | 3.1743380000  | 0.7089370000  | -2.1331140000 |
| H | -2.8250720000 | 3.0092760000  | -2.1258280000 |
| C | -2.1341400000 | 1.1953790000  | -1.2149700000 |
| C | 1.5621180000  | -0.3533040000 | -1.2103730000 |
| C | 2.7201740000  | 0.4055670000  | -1.1977940000 |
| C | -2.6737760000 | 2.4775190000  | -1.1944250000 |
| H | 1.3401200000  | -3.3296270000 | -0.5480130000 |
| I | -1.0643710000 | -1.4383800000 | -0.0265590000 |
| C | -1.9462910000 | 0.5222410000  | -0.0133340000 |
| C | 1.0180470000  | -0.7578530000 | 0.0078160000  |
| C | 3.2958300000  | 0.7963110000  | 0.0142960000  |
| C | -3.0141550000 | 3.0722810000  | 0.0158620000  |
| C | 4.4838630000  | 1.5958570000  | 0.0174890000  |
| N | 5.4383380000  | 2.2403690000  | 0.0185770000  |
| H | -3.4318890000 | 4.0715350000  | 0.0275090000  |
| O | 0.8860170000  | -2.8453170000 | 0.1504470000  |
| C | -2.2778000000 | 1.1071700000  | 1.2030820000  |
| C | -2.8171080000 | 2.3896960000  | 1.2115560000  |
| C | 2.6965420000  | 0.4253480000  | 1.2232300000  |
| C | 1.5417880000  | -0.3352870000 | 1.2288790000  |
| H | -2.1221080000 | 0.5760780000  | 2.1345780000  |
| H | -3.0794080000 | 2.8540150000  | 2.1543360000  |
| H | 1.0831910000  | -0.6363070000 | 2.1604620000  |
| H | 3.1373900000  | 0.7399460000  | 2.1612100000  |

#### TS4-1m (M06-2X, Toluene)

|                 |   |             |
|-----------------|---|-------------|
| $E_0 + E_{ZPE}$ | = | -754.534401 |
|-----------------|---|-------------|

$E_0 + E_{\text{tot}} = -754.518674$   
 $E_0 + H_{\text{corr}} = -754.517730$   
 $E_0 + G_{\text{corr}} = -754.581171$

Frequency: -439.75  
 Coordinates:

|   |               |               |               |
|---|---------------|---------------|---------------|
| H | -0.8470890000 | -0.7079810000 | -2.1601430000 |
| H | 2.1521490000  | 0.7618330000  | -2.1443960000 |
| H | -3.1969670000 | 0.1148820000  | -2.1385950000 |
| H | 2.3289560000  | 3.2261400000  | -2.1223630000 |
| C | -1.3635730000 | -0.5660790000 | -1.2189480000 |
| C | -2.6741050000 | -0.1068340000 | -1.2184590000 |
| C | 2.2008150000  | 1.2995780000  | -1.2067840000 |
| C | 2.3063780000  | 2.6884830000  | -1.1816180000 |
| O | -5.2212090000 | 0.7915260000  | -1.0620060000 |
| H | 4.3074550000  | -0.8500690000 | -0.5952390000 |
| I | 1.3359200000  | -1.4509920000 | -0.0198850000 |
| C | -0.7291130000 | -0.8390580000 | -0.0109240000 |
| C | -3.3078480000 | 0.0683420000  | 0.0017840000  |
| C | 2.1993160000  | 0.6305240000  | 0.0080060000  |
| N | -4.7024480000 | 0.5596060000  | 0.0082580000  |
| C | 2.3690430000  | 3.3793650000  | 0.0226980000  |
| H | 2.4432610000  | 4.4590810000  | 0.0292610000  |
| O | 3.6608210000  | -0.8699320000 | 0.1191910000  |
| O | -5.2433660000 | 0.7007840000  | 1.0831980000  |
| C | -1.3818030000 | -0.6528330000 | 1.2037690000  |
| C | -2.6928250000 | -0.1944380000 | 1.2158460000  |
| C | 2.3269200000  | 2.6714080000  | 1.2203370000  |
| C | 2.2264070000  | 1.2843630000  | 1.2305640000  |
| H | -0.8789550000 | -0.8616380000 | 2.1398470000  |
| H | -3.2293900000 | -0.0393410000 | 2.1417280000  |
| H | 2.2136940000  | 0.7292710000  | 2.1583610000  |
| H | 2.3726400000  | 3.1971740000  | 2.1669780000  |

**TS4-1n (M06-2X, Toluene)**

$E_0 + E_{\text{ZPE}} = -1469.267200$   
 $E_0 + E_{\text{tot}} = -1469.251571$   
 $E_0 + H_{\text{corr}} = -1469.250627$   
 $E_0 + G_{\text{corr}} = -1469.313757$

Frequency: -423.21  
 Coordinates:

|    |               |               |               |
|----|---------------|---------------|---------------|
| H  | 1.7013560000  | -0.3886240000 | -2.1524010000 |
| H  | -1.6492530000 | -0.5756940000 | -2.1509550000 |
| H  | 2.8825060000  | 1.7879750000  | -2.1420170000 |
| H  | -3.5002340000 | 1.0709010000  | -2.1383940000 |
| C  | 1.9795000000  | 0.0743510000  | -1.2150270000 |
| C  | -3.0947640000 | 0.6936800000  | -1.2083250000 |
| C  | -2.0555310000 | -0.2291300000 | -1.2082590000 |
| C  | 2.6487960000  | 1.2939620000  | -1.2073700000 |
| H  | 3.0900710000  | -2.7255650000 | -0.5942630000 |
| I  | 0.0946580000  | -2.0765260000 | -0.0105170000 |
| C  | 2.9997480000  | 1.8803130000  | -0.0009060000 |
| C  | -1.5520810000 | -0.6999050000 | -0.0008270000 |
| C  | 1.7174020000  | -0.5468010000 | -0.0007190000 |
| Cl | 3.8265670000  | 3.4216020000  | 0.0010340000  |
| C  | -3.6073030000 | 1.1319030000  | 0.0056000000  |
| Cl | -4.9093480000 | 2.2901320000  | 0.0097020000  |
| O  | 2.4756700000  | -2.4921830000 | 0.1104670000  |
| C  | 2.6911050000  | 1.2683530000  | 1.2071780000  |
| C  | -2.0671690000 | -0.2516230000 | 1.2100190000  |
| C  | 2.0276720000  | 0.0488930000  | 1.2154700000  |
| C  | -3.1063150000 | 0.6714670000  | 1.2162800000  |
| H  | 2.9656640000  | 1.7407090000  | 2.1419320000  |
| H  | -3.5207760000 | 1.0320240000  | 2.1489630000  |

|   |               |               |              |
|---|---------------|---------------|--------------|
| H | 1.7993200000  | -0.4454260000 | 2.1494890000 |
| H | -1.6700100000 | -0.6152210000 | 2.1501010000 |

**TS4-1o (M06-2X, Toluene)**

$E_0 + E_{\text{ZPE}} = -748.546024$   
 $E_0 + E_{\text{tot}} = -748.531159$   
 $E_0 + H_{\text{corr}} = -748.530215$   
 $E_0 + G_{\text{corr}} = -748.590562$

Frequency: -430.39  
 Coordinates:

|   |               |               |               |
|---|---------------|---------------|---------------|
| H | 1.7175140000  | -0.0114010000 | -2.1307810000 |
| H | -1.3802010000 | 0.1291760000  | -2.1106510000 |
| H | -3.2813030000 | 1.7403940000  | -2.0577910000 |
| H | 2.8400520000  | 2.2149900000  | -2.0560950000 |
| C | -1.9348890000 | 0.2830460000  | -1.1929540000 |
| C | 1.9519530000  | 0.4524000000  | -1.1819280000 |
| C | -2.9942230000 | 1.1823220000  | -1.1758590000 |
| C | 2.5862900000  | 1.6911240000  | -1.1431890000 |
| H | 3.1157290000  | -2.3301070000 | -0.5683670000 |
| I | 0.0706850000  | -1.7526730000 | -0.0573840000 |
| C | -1.6013140000 | -0.4115780000 | -0.0345520000 |
| C | -3.6900960000 | 1.3578690000  | 0.0069810000  |
| C | 1.6727830000  | -0.1881740000 | 0.0183050000  |
| F | -4.7153270000 | 2.2241720000  | 0.0265340000  |
| C | 2.8800240000  | 2.2593300000  | 0.0808800000  |
| O | 2.4651530000  | -2.1201260000 | 0.1109640000  |
| F | 3.4826690000  | 3.4674000000  | 0.1130890000  |
| C | -2.3083450000 | -0.2134780000 | 1.1464480000  |
| C | -3.3733050000 | 0.6795300000  | 1.1703380000  |
| C | 1.9333480000  | 0.3989570000  | 1.2499250000  |
| C | 2.5626710000  | 1.6374450000  | 1.2751360000  |
| H | -2.0400170000 | -0.7499400000 | 2.0482860000  |
| H | -3.9473580000 | 0.8567650000  | 2.0706170000  |
| H | 1.6895190000  | -0.1133010000 | 2.1700900000  |
| H | 2.8030500000  | 2.1192220000  | 2.2145540000  |

**TS5-1a (B3LYP-D3, CH<sub>2</sub>Cl<sub>2</sub>)**

$E_0 + E_{\text{ZPE}} = -830.905548$   
 $E_0 + E_{\text{tot}} = -830.887314$   
 $E_0 + H_{\text{corr}} = -830.886370$   
 $E_0 + G_{\text{corr}} = -830.953681$

Frequency: -246.290  
 Coordinates:

|   |               |               |               |
|---|---------------|---------------|---------------|
| H | -0.9322940000 | -0.8946510000 | -2.1567690000 |
| H | -3.2331450000 | -0.0031670000 | -2.1197340000 |
| C | -1.4148070000 | -0.6742170000 | -1.2131840000 |
| C | -2.6970990000 | -0.1787590000 | -1.1970940000 |
| O | -5.2313520000 | 0.8380600000  | -1.0311580000 |
| H | 4.2711540000  | -1.4905310000 | -0.8210300000 |
| H | -0.1881230000 | 1.5316090000  | -0.4973160000 |
| H | 0.2716040000  | 3.9488510000  | -0.4728320000 |
| C | 0.8135280000  | 1.8810710000  | -0.2917070000 |
| C | 1.0787190000  | 3.2523920000  | -0.2753700000 |
| C | 1.8584550000  | 0.9995970000  | -0.0425950000 |
| O | -0.4886830000 | -2.9968270000 | -0.0235790000 |
| I | 1.4791090000  | -1.1858250000 | -0.0223060000 |
| C | 2.3641100000  | 3.7199130000  | -0.0096490000 |
| C | -0.7232700000 | -0.9179840000 | 0.0000570000  |
| H | 2.5620840000  | 4.7856550000  | 0.0031740000  |
| C | -3.3152150000 | 0.1246780000  | 0.0316800000  |
| N | -4.6374870000 | 0.6620870000  | 0.0478730000  |
| O | 3.9333520000  | -1.3999600000 | 0.0785800000  |
| C | 3.1465660000  | 1.4388850000  | 0.2232140000  |
| C | 3.3934120000  | 2.8131100000  | 0.2383770000  |



|   |               |               |              |   |               |               |               |
|---|---------------|---------------|--------------|---|---------------|---------------|---------------|
| H | 3.9241650000  | 0.7012410000  | 0.3943710000 | I | 1.4687350000  | -1.1889610000 | -0.0377880000 |
| H | 4.3965590000  | 3.1689820000  | 0.4460190000 | C | 2.3275910000  | 3.6780870000  | -0.0275710000 |
| H | -0.7933610000 | -3.2238260000 | 0.8646930000 | H | 2.5164350000  | 4.7447830000  | -0.0124030000 |
| O | -5.1646970000 | 0.9390450000  | 1.1404090000 | O | 3.8391270000  | -1.3488130000 | 0.0129150000  |
| C | -1.3352700000 | -0.5512060000 | 1.2234010000 | C | -0.6816450000 | -0.8713160000 | 0.0152660000  |
| C | -2.6210900000 | -0.0581800000 | 1.2405610000 | C | -3.2771180000 | 0.1269880000  | 0.0552920000  |
| H | -0.7908850000 | -0.6632470000 | 2.1530470000 | N | -4.6159060000 | 0.6480230000  | 0.0757540000  |
| H | -3.0953310000 | 0.2148200000  | 2.1732980000 | O | -0.4736740000 | -2.9432750000 | 0.0840440000  |

**TS5-1a (B3LYP-D3, H<sub>2</sub>O)**

|                  |   |             |
|------------------|---|-------------|
| $E_0 + E_{ZPE}$  | = | -830.915875 |
| $E_0 + E_{tot}$  | = | -830.897591 |
| $E_0 + H_{corr}$ | = | -830.896646 |
| $E_0 + G_{corr}$ | = | -830.965545 |

Frequency: -271.450

Coordinates:

|   |               |               |               |
|---|---------------|---------------|---------------|
| H | -0.8955850000 | -0.8059700000 | -2.1639980000 |
| H | -3.1912930000 | 0.0962140000  | -2.1386940000 |
| C | -1.3972170000 | -0.6235830000 | -1.2222570000 |
| C | -2.6774800000 | -0.1206620000 | -1.2122250000 |
| O | -5.2115920000 | 0.9215930000  | -1.0707250000 |
| H | 4.2472040000  | -1.5970070000 | -0.8306610000 |
| H | -0.2012000000 | 1.5606850000  | -0.2629320000 |
| H | 0.2931810000  | 3.9705100000  | -0.2447940000 |
| C | 0.8203710000  | 1.8935980000  | -0.1496520000 |
| C | 1.1058820000  | 3.2610660000  | -0.1381840000 |
| O | -0.5362390000 | -2.9854050000 | -0.0676390000 |
| C | 1.8736880000  | 0.9974690000  | -0.0161560000 |
| I | 1.4695970000  | -1.1821530000 | -0.0130580000 |
| C | -0.7347830000 | -0.9227880000 | -0.0050990000 |
| C | 2.4176240000  | 3.7081480000  | 0.0071340000  |
| C | -3.3205220000 | 0.1354570000  | 0.0145240000  |
| H | 2.6307070000  | 4.7708320000  | 0.0151320000  |
| N | -4.6453170000 | 0.6735770000  | 0.0249550000  |
| O | 3.9377710000  | -1.4537420000 | 0.0723730000  |
| C | 3.1874500000  | 1.4141340000  | 0.1324300000  |
| C | 3.4534970000  | 2.7851980000  | 0.1422140000  |
| H | 3.9673940000  | 0.6655230000  | 0.2291200000  |
| H | 4.4766110000  | 3.1254240000  | 0.2572090000  |
| H | -0.8363910000 | -3.2182210000 | 0.8208250000  |
| O | -5.2108160000 | 0.8807380000  | 1.1294950000  |
| C | -1.3649920000 | -0.5911070000 | 1.2197540000  |
| C | -2.6498060000 | -0.0942300000 | 1.2293440000  |
| H | -0.8378450000 | -0.7375110000 | 2.1543350000  |
| H | -3.1394460000 | 0.1468980000  | 2.1628860000  |

**TS5-1a (M06-2X, CH<sub>2</sub>Cl<sub>2</sub>)**

|                  |   |             |
|------------------|---|-------------|
| $E_0 + E_{ZPE}$  | = | -830.474331 |
| $E_0 + E_{tot}$  | = | -830.456302 |
| $E_0 + H_{corr}$ | = | -830.455358 |
| $E_0 + G_{corr}$ | = | -830.522110 |

Frequency: -332.800

Coordinates:

|   |               |               |               |
|---|---------------|---------------|---------------|
| H | -0.9461640000 | -0.9794450000 | -2.1312910000 |
| H | -3.2637700000 | -0.1246950000 | -2.0830180000 |
| C | -1.4070520000 | -0.7076780000 | -1.1893170000 |
| C | -2.6967690000 | -0.2353150000 | -1.1682560000 |
| O | -5.2239380000 | 0.7507810000  | -0.9827170000 |
| H | -0.0666240000 | 1.4550750000  | -0.9379650000 |
| H | 0.3766270000  | 3.8719930000  | -0.9130840000 |
| H | 4.2337550000  | -1.2065420000 | -0.8531090000 |
| C | 0.8756680000  | 1.8196260000  | -0.5500940000 |
| C | 1.1271120000  | 3.1902840000  | -0.5307750000 |
| C | 1.8471910000  | 0.9512710000  | -0.0694400000 |

**TS5-1a (M06-2X, H<sub>2</sub>O)**

|                  |   |             |
|------------------|---|-------------|
| $E_0 + E_{ZPE}$  | = | -830.485259 |
| $E_0 + E_{tot}$  | = | -830.467250 |
| $E_0 + H_{corr}$ | = | -830.466306 |
| $E_0 + G_{corr}$ | = | -830.533199 |

Frequency: -357.390

Coordinates:

|   |               |               |               |
|---|---------------|---------------|---------------|
| H | -0.9508290000 | -0.9925340000 | -2.1289900000 |
| H | -3.2640650000 | -0.1321580000 | -2.0718240000 |
| H | 0.0533600000  | 1.4058300000  | -1.1965260000 |
| C | -1.4062500000 | -0.7180280000 | -1.1850530000 |
| H | 0.4757190000  | 3.8299570000  | -1.1653580000 |
| C | -2.6941140000 | -0.2414900000 | -1.1587500000 |
| O | -5.2241570000 | 0.7339290000  | -0.9614700000 |
| H | 4.2710220000  | -0.9484990000 | -0.7894900000 |
| C | 0.9345830000  | 1.7890220000  | -0.6982020000 |
| C | 1.1732680000  | 3.1619820000  | -0.6744810000 |
| C | 1.8414330000  | 0.9420330000  | -0.0763790000 |
| I | 1.4728890000  | -1.1905710000 | -0.0506260000 |
| C | 2.2952530000  | 3.6690170000  | -0.0290500000 |
| H | 2.4742080000  | 4.7372260000  | -0.0118500000 |
| O | 3.8568080000  | -1.3265850000 | -0.0074380000 |
| C | -0.6777310000 | -0.8838820000 | 0.0182420000  |
| C | -3.2664700000 | 0.1286220000  | 0.0664610000  |
| N | -4.6040120000 | 0.6488260000  | 0.0920350000  |
| O | -0.5041240000 | -2.9383410000 | 0.1143000000  |
| C | 2.9687360000  | 1.4270670000  | 0.5700080000  |
| C | 3.1887980000  | 2.8018810000  | 0.5923860000  |
| H | -0.7949910000 | -3.1148680000 | 1.0157490000  |
| H | 3.6663420000  | 0.7304420000  | 1.0165760000  |
| H | 4.0650460000  | 3.1917560000  | 1.0966180000  |
| O | -5.0856960000 | 0.9883320000  | 1.1664110000  |
| C | -1.2430860000 | -0.4210870000 | 1.2279070000  |
| C | -2.5358600000 | 0.0536030000  | 1.2560470000  |
| H | -0.6633210000 | -0.4525080000 | 2.1429150000  |
| H | -2.9815220000 | 0.3927370000  | 2.1818670000  |

**TS5-1a-Na (M06-2X, CH<sub>2</sub>Cl<sub>2</sub>)**

|                  |   |             |
|------------------|---|-------------|
| $E_0 + E_{ZPE}$  | = | -992.701779 |
| $E_0 + E_{tot}$  | = | -992.681481 |
| $E_0 + H_{corr}$ | = | -992.680537 |
| $E_0 + G_{corr}$ | = | -992.753520 |

Frequency: -336.030

Coordinates:

|   |               |               |               |
|---|---------------|---------------|---------------|
| H | -1.1326650000 | -0.7615600000 | -2.1868960000 |
|---|---------------|---------------|---------------|

|    |               |               |               |   |               |               |              |
|----|---------------|---------------|---------------|---|---------------|---------------|--------------|
| H  | -3.5550530000 | -0.2908730000 | -2.0454260000 | O | -5.4745900000 | 0.1709740000  | 1.3315500000 |
| H  | -0.0526720000 | 1.5790330000  | -1.6707250000 | H | 2.7154750000  | 1.3482070000  | 1.5716030000 |
| H  | -0.0145190000 | 4.0443520000  | -1.5736340000 | H | 2.7140370000  | 3.8252800000  | 1.7147610000 |
| C  | -1.6104440000 | -0.6503750000 | -1.2215300000 | H | -0.8612510000 | -0.6654430000 | 2.1076120000 |
| C  | -2.9606380000 | -0.3959710000 | -1.1477120000 | H | -3.2777830000 | -0.1903780000 | 2.2581250000 |
| C  | 0.5819150000  | 2.0810280000  | -0.9507740000 |   |               |               |              |
| C  | 0.6033690000  | 3.4727680000  | -0.8918020000 |   |               |               |              |
| O  | -5.6134490000 | 0.1178550000  | -0.8587240000 |   |               |               |              |
| H  | 4.0940850000  | 0.3131440000  | -0.4723430000 |   |               |               |              |
| O  | -0.3144310000 | -2.8357100000 | -0.1484440000 |   |               |               |              |
| I  | 1.3126340000  | -0.7821520000 | -0.1172740000 |   |               |               |              |
| C  | 1.3832790000  | 1.3632990000  | -0.0744330000 |   |               |               |              |
| O  | 3.7818470000  | -0.5002470000 | -0.0686730000 |   |               |               |              |
| C  | -0.8598670000 | -0.8278030000 | -0.0397860000 |   |               |               |              |
| C  | 1.4146490000  | 4.1220170000  | 0.0316200000  |   |               |               |              |
| H  | 1.4273390000  | 5.2042730000  | 0.0734090000  |   |               |               |              |
| C  | -3.5664310000 | -0.2610550000 | 0.1057090000  |   |               |               |              |
| N  | -4.9800100000 | 0.0182910000  | 0.1820780000  |   |               |               |              |
| Na | 4.9258440000  | -2.3192390000 | 0.2358030000  |   |               |               |              |
| H  | -0.6610780000 | -3.1730260000 | 0.6843710000  |   |               |               |              |
| C  | 2.1989550000  | 1.9922610000  | 0.8553720000  |   |               |               |              |
| C  | 2.2107690000  | 3.3832290000  | 0.9022000000  |   |               |               |              |
| C  | -1.4673600000 | -0.5925450000 | 1.2099390000  |   |               |               |              |
| C  | -2.8220250000 | -0.3433810000 | 1.2826700000  |   |               |               |              |
| O  | -5.4932460000 | 0.1424830000  | 1.2847780000  |   |               |               |              |
| H  | 2.8235230000  | 1.4057550000  | 1.5166760000  |   |               |               |              |
| H  | 2.8417280000  | 3.8867540000  | 1.6246530000  |   |               |               |              |
| H  | -0.8803660000 | -0.6363320000 | 2.1192140000  |   |               |               |              |
| H  | -3.3069200000 | -0.1897530000 | 2.2375060000  |   |               |               |              |

**TS5-1a-Na (M06-2X, H<sub>2</sub>O)**

$E_0 + E_{ZPE} = -992.712806$   
 $E_0 + E_{tot} = -992.692612$   
 $E_0 + H_{corr} = -992.691668$   
 $E_0 + G_{corr} = -992.764629$

Frequency: -360.150

Coordinates:

|    |               |               |               |
|----|---------------|---------------|---------------|
| H  | -1.1663670000 | -0.7563000000 | -2.1978000000 |
| H  | -3.5778680000 | -0.2580970000 | -2.0248830000 |
| H  | 0.0030280000  | 1.5512440000  | -1.7564400000 |
| H  | 0.0196290000  | 4.0161360000  | -1.6201870000 |
| C  | -1.6316050000 | -0.6537580000 | -1.2250740000 |
| C  | -2.9765990000 | -0.3826360000 | -1.1341580000 |
| C  | 0.5951720000  | 2.0465460000  | -0.9968390000 |
| C  | 0.6054710000  | 3.4376810000  | -0.9162730000 |
| O  | -5.6216310000 | 0.1518390000  | -0.8103910000 |
| H  | 3.9932530000  | 0.3314240000  | -0.5822180000 |
| O  | 3.7331250000  | -0.4981770000 | -0.1731680000 |
| I  | 1.3035160000  | -0.8225310000 | -0.1676080000 |
| O  | -0.3834050000 | -2.8584700000 | -0.1599540000 |
| C  | 1.3566920000  | 1.3204390000  | -0.0924250000 |
| C  | -0.8666700000 | -0.8546940000 | -0.0533630000 |
| C  | 1.3664630000  | 4.0768290000  | 0.0560780000  |
| H  | 1.3711330000  | 5.1583900000  | 0.1143480000  |
| C  | -3.5680780000 | -0.2505240000 | 0.1278760000  |
| N  | -4.9729580000 | 0.0432710000  | 0.2221030000  |
| Na | 5.2030720000  | -1.9929590000 | 0.4429160000  |
| H  | -0.6249430000 | -3.1695100000 | 0.7194190000  |
| C  | 2.1220410000  | 1.9391820000  | 0.8861080000  |
| C  | 2.1230630000  | 3.3292880000  | 0.9543170000  |
| C  | -1.4590090000 | -0.6126360000 | 1.2055920000  |
| C  | -2.8078970000 | -0.3467990000 | 1.2961250000  |

**TS5-1c (B3LYP-D3, CH<sub>2</sub>Cl<sub>2</sub>)**

$E_0 + E_{ZPE} = -855.374957$   
 $E_0 + E_{tot} = -855.353609$   
 $E_0 + H_{corr} = -855.352664$   
 $E_0 + G_{corr} = -855.426573$

Frequency: -362.260

Coordinates:

|   |               |               |               |
|---|---------------|---------------|---------------|
| H | -1.7840290000 | -0.5823430000 | -2.0777930000 |
| H | -3.2211390000 | 1.3898450000  | -1.9364570000 |
| H | -5.1901560000 | 2.5525980000  | -1.3953760000 |
| H | -3.7410550000 | 3.5927380000  | -1.2997040000 |
| C | -2.1150250000 | -0.2378720000 | -1.1065510000 |
| C | -2.9337620000 | 0.8909120000  | -1.0202070000 |
| C | -4.5883260000 | 3.1870240000  | -0.7349970000 |
| H | 2.6875900000  | 4.7084600000  | -0.6911100000 |
| H | 2.6410310000  | -3.9948610000 | -0.6297430000 |
| H | -5.2018550000 | 4.0084540000  | -0.3680040000 |
| H | 3.3568780000  | -1.3038970000 | -0.2557060000 |
| H | 4.7678630000  | 0.7941160000  | -0.2550240000 |
| C | 2.9235710000  | -0.3119040000 | -0.1460620000 |
| C | 3.6908000000  | 0.8463570000  | -0.1448980000 |
| O | -2.2540140000 | -2.8495740000 | -0.1435940000 |
| O | 2.8546950000  | -3.2243790000 | -0.0903430000 |
| O | 3.9361290000  | 3.1749310000  | -0.0136830000 |
| I | 0.3285970000  | -2.0218080000 | -0.0133520000 |
| C | 1.5434920000  | -0.2012740000 | -0.0022100000 |
| C | 3.0885350000  | 2.1021750000  | -0.0002480000 |
| C | -1.7277910000 | -0.9189990000 | 0.0494620000  |
| H | 4.2231170000  | 5.1698950000  | 0.0864280000  |
| C | 3.3802380000  | 4.4825510000  | 0.1259760000  |
| C | 0.9247530000  | 1.0310360000  | 0.1465670000  |
| C | 1.7022760000  | 2.1934440000  | 0.1467380000  |
| C | -3.3551430000 | 1.3637260000  | 0.2244970000  |
| H | -0.1471000000 | 1.1167030000  | 0.2596820000  |
| H | 1.2088280000  | 3.1485590000  | 0.2624470000  |
| O | -4.1528220000 | 2.4742180000  | 0.4170870000  |
| H | -2.7351510000 | -2.9917160000 | 0.6823280000  |
| H | 2.8639760000  | 4.5943460000  | 1.0847960000  |
| C | -2.1220000000 | -0.4251330000 | 1.3027460000  |
| C | -2.9404910000 | 0.6958690000  | 1.3803930000  |
| H | -1.7894910000 | -0.9120020000 | 2.2112880000  |
| H | -3.2536110000 | 1.0758810000  | 2.3466290000  |

**TS5-1c (B3LYP-D3, H<sub>2</sub>O)**

$E_0 + E_{ZPE} = -855.388211$   
 $E_0 + E_{tot} = -855.366547$   
 $E_0 + H_{corr} = -855.365602$   
 $E_0 + G_{corr} = -855.440713$

Frequency: -375.850

Coordinates:

|   |               |               |               |
|---|---------------|---------------|---------------|
| H | -1.7876870000 | -0.5890840000 | -2.0808700000 |
| H | -3.2342660000 | 1.3784750000  | -1.9422570000 |
| H | -5.1942720000 | 2.5563270000  | -1.4150540000 |

|   |              |              |              |   |              |              |             |
|---|--------------|--------------|--------------|---|--------------|--------------|-------------|
| H | -3.740300000 | 3.587437000  | -1.288979000 | C | 3.416005000  | 4.372223000  | 0.211404000 |
| C | -2.124531000 | -0.246759000 | -1.111038000 | C | -3.285676000 | 1.395655000  | 0.211407000 |
| C | -2.949044000 | 0.879055000  | -1.025898000 | C | 1.733221000  | 2.133137000  | 0.260985000 |
| C | -4.597377000 | 3.180532000  | -0.741489000 | C | 0.938295000  | 0.985107000  | 0.275842000 |
| H | 2.678264000  | 4.725296000  | -0.669088000 | O | -4.099615000 | 2.489801000  | 0.403229000 |
| H | 2.676154000  | -4.036577000 | -0.597302000 | H | -2.964964000 | -2.764042000 | 0.459043000 |
| H | -5.210822000 | 4.000046000  | -0.371160000 | H | 1.271393000  | 3.087067000  | 0.475498000 |
| H | 4.763851000  | 0.807100000  | -0.290354000 | H | -0.115957000 | 1.084418000  | 0.500633000 |
| H | 3.356200000  | -1.288812000 | -0.285879000 | H | 2.997167000  | 4.415547000  | 1.220541000 |
| C | 3.688533000  | 0.858603000  | -0.164089000 | C | -2.087192000 | -0.417835000 | 1.277778000 |
| C | 2.921418000  | -0.299694000 | -0.163739000 | C | -2.913919000 | 0.691263000  | 1.357111000 |
| O | -2.238992000 | -2.882034000 | -0.141433000 | H | -1.786681000 | -0.930284000 | 2.184348000 |
| O | 2.941426000  | -3.255075000 | -0.098216000 | H | -3.266707000 | 1.040629000  | 2.321421000 |
| O | 3.933612000  | 3.184838000  | -0.018246000 |   |              |              |             |
| I | 0.331055000  | -2.009134000 | -0.010635000 |   |              |              |             |
| C | 3.087697000  | 2.113550000  | -0.001114000 |   |              |              |             |
| C | 1.543642000  | -0.189838000 | 0.001471000  |   |              |              |             |
| C | -1.742181000 | -0.919453000 | 0.047730000  |   |              |              |             |
| H | 4.223974000  | 5.179976000  | 0.092119000  |   |              |              |             |
| C | 3.380350000  | 4.494385000  | 0.137820000  |   |              |              |             |
| C | 1.703008000  | 2.203015000  | 0.166066000  |   |              |              |             |
| C | 0.925878000  | 1.040640000  | 0.168153000  |   |              |              |             |
| C | -3.376849000 | 1.347378000  | 0.218385000  |   |              |              |             |
| H | 1.211285000  | 3.157090000  | 0.295601000  |   |              |              |             |
| H | -0.144492000 | 1.124926000  | 0.296966000  |   |              |              |             |
| O | -4.178848000 | 2.450626000  | 0.409609000  |   |              |              |             |
| H | -2.693448000 | -3.035437000 | 0.697729000  |   |              |              |             |
| H | 2.877247000  | 4.598651000  | 1.103918000  |   |              |              |             |
| C | -2.142478000 | -0.439000000 | 1.300803000  |   |              |              |             |
| C | -2.965717000 | 0.678676000  | 1.375966000  |   |              |              |             |
| H | -1.814057000 | -0.928856000 | 2.208754000  |   |              |              |             |
| H | -3.285210000 | 1.054187000  | 2.341630000  |   |              |              |             |

**TS5-1c (M06-2X, CH<sub>2</sub>Cl<sub>2</sub>)**

$E_0 + E_{ZPE} = -854.926368$   
 $E_0 + E_{tot} = -854.905418$   
 $E_0 + H_{corr} = -854.904474$   
 $E_0 + G_{corr} = -854.977603$

Frequency: -404.800

Coordinates:

|   |              |              |              |
|---|--------------|--------------|--------------|
| H | -1.586316000 | -0.439983000 | -2.082920000 |
| H | -3.044537000 | 1.509232000  | -1.932826000 |
| H | -5.037849000 | 2.563752000  | -1.447613000 |
| H | -3.621135000 | 3.633218000  | -1.263794000 |
| C | -1.970438000 | -0.142583000 | -1.114880000 |
| C | -2.801654000 | 0.973422000  | -1.023897000 |
| C | -4.488415000 | 3.204832000  | -0.750671000 |
| H | 2.646258000  | 4.642925000  | -0.516635000 |
| H | 4.712713000  | 0.718981000  | -0.507104000 |
| H | 3.284373000  | -1.349903000 | -0.463702000 |
| H | -5.138135000 | 4.008216000  | -0.410052000 |
| C | 3.652322000  | 0.778451000  | -0.292162000 |
| C | 2.869163000  | -0.364500000 | -0.278950000 |
| O | -2.263804000 | -2.715070000 | -0.200009000 |
| H | 2.443447000  | -4.106988000 | -0.138400000 |
| O | 3.946579000  | 3.086780000  | -0.064293000 |
| O | 2.669171000  | -3.175262000 | -0.059329000 |
| C | 3.092241000  | 2.030144000  | -0.025155000 |
| I | 0.279837000  | -2.012726000 | 0.000236000  |
| C | 1.511198000  | -0.246333000 | 0.002957000  |
| C | -1.647263000 | -0.891979000 | 0.024665000  |
| H | 4.249572000  | 5.065684000  | 0.133645000  |

**TS5-1c (M06-2X, H<sub>2</sub>O)**

$E_0 + E_{ZPE} = -854.938804$   
 $E_0 + E_{tot} = -854.917899$   
 $E_0 + H_{corr} = -854.916955$   
 $E_0 + G_{corr} = -854.989813$

Frequency: -425.910

Coordinates:

|   |              |              |              |
|---|--------------|--------------|--------------|
| H | -1.485456000 | -0.400459000 | -2.086605000 |
| H | -2.940733000 | 1.551632000  | -1.943654000 |
| H | -4.887421000 | 2.687078000  | -1.540366000 |
| H | -3.447965000 | 3.679262000  | -1.182525000 |
| C | -1.913764000 | -0.132250000 | -1.128467000 |
| C | -2.743445000 | 0.986764000  | -1.041402000 |
| H | 4.599788000  | 0.823874000  | -0.801440000 |
| C | -4.369714000 | 3.261294000  | -0.765850000 |
| H | 3.227946000  | -1.277133000 | -0.710333000 |
| C | 3.573052000  | 0.843392000  | -0.455616000 |
| H | -5.012724000 | 4.069953000  | -0.425829000 |
| C | 2.816084000  | -0.316412000 | -0.423120000 |
| H | 2.472456000  | 4.678272000  | -0.325084000 |
| O | -2.241712000 | -2.744121000 | -0.281347000 |
| O | 3.852079000  | 3.138208000  | -0.113116000 |
| C | 3.028114000  | 2.062070000  | -0.040196000 |
| O | 2.756774000  | -3.137481000 | -0.031258000 |
| C | -1.650001000 | -0.914365000 | 0.001195000  |
| I | 0.295696000  | -2.023654000 | 0.021183000  |
| C | 1.501465000  | -0.248263000 | 0.028305000  |
| H | 2.548379000  | -4.073318000 | 0.051717000  |
| H | 4.133857000  | 5.114692000  | 0.145312000  |
| C | -3.282400000 | 1.372595000  | 0.182055000  |
| C | 3.331263000  | 4.396260000  | 0.289483000  |
| H | -2.976694000 | -2.809126000 | 0.338884000  |
| O | -4.099530000 | 2.462362000  | 0.369390000  |
| C | 1.712883000  | 2.113487000  | 0.416760000  |
| C | 0.944816000  | 0.948065000  | 0.449015000  |
| H | 1.267182000  | 3.040114000  | 0.751206000  |
| H | -0.077891000 | 1.004298000  | 0.801239000  |
| C | -2.147124000 | -0.482943000 | 1.246656000  |
| C | -2.970053000 | 0.628954000  | 1.321890000  |
| H | 3.039872000  | 4.379665000  | 1.342953000  |
| H | -1.894850000 | -1.028153000 | 2.148677000  |
| H | -3.365551000 | 0.949358000  | 2.279546000  |

**TS5-1c-Na (M06-2X, CH<sub>2</sub>Cl<sub>2</sub>)**

$E_0 + E_{ZPE} = -1017.158232$   
 $E_0 + E_{tot} = -1017.135151$   
 $E_0 + H_{corr} = -1017.134206$   
 $E_0 + G_{corr} = -1017.213074$

Frequency: -437.700

Coordinates:

|    |               |               |               |   |               |               |              |
|----|---------------|---------------|---------------|---|---------------|---------------|--------------|
| H  | -3.2839020000 | -0.7384410000 | -2.0922830000 | H | -1.5284910000 | 6.5272890000  | 0.0428400000 |
| H  | -0.9276530000 | -1.3598420000 | -2.0056130000 | C | -3.4717470000 | -1.4190020000 | 0.1006470000 |
| H  | -5.5481800000 | -1.1050650000 | -1.8313530000 | C | 0.8378700000  | 1.0433300000  | 0.1094280000 |
| H  | -5.0850810000 | 0.6017080000  | -1.5879480000 | O | 4.0114730000  | 0.0266850000  | 0.1469480000 |
| Na | 4.5647530000  | -2.0550900000 | -1.3061620000 | I | 1.4143750000  | -1.0180020000 | 0.1733210000 |
| C  | -2.8533970000 | -0.9957100000 | -1.1331020000 | C | -1.5043670000 | 5.4571220000  | 0.2303870000 |
| C  | -5.5661180000 | -0.2671370000 | -1.1274240000 | O | -4.8289750000 | -1.2647220000 | 0.2398910000 |
| C  | -1.5053690000 | -1.3527620000 | -1.0897680000 | H | -0.1573650000 | -4.0504270000 | 0.2797180000 |
| H  | -6.5975050000 | -0.0223960000 | -0.8836180000 | C | -0.8173620000 | 2.7476320000  | 0.4534360000 |
| H  | -1.4940810000 | 5.2577560000  | -0.5928320000 | C | -0.4260870000 | 1.4108100000  | 0.5394770000 |
| H  | 2.6762930000  | 3.7436840000  | -0.5623750000 | H | 4.2789060000  | 0.7231700000  | 0.7511960000 |
| H  | 3.0123180000  | 1.2537490000  | -0.3498540000 | H | -1.8058180000 | 3.0240320000  | 0.7932180000 |
| C  | 1.8568660000  | 3.0902730000  | -0.2877360000 | H | -1.1229860000 | 0.6828530000  | 0.9378110000 |
| C  | 2.0453850000  | 1.7221930000  | -0.1850200000 | C | -1.3876640000 | -1.9027970000 | 1.2351890000 |
| O  | 0.5232460000  | 5.0042780000  | -0.1636980000 | C | -2.7624990000 | -1.7381350000 | 1.2604870000 |
| H  | -0.5765150000 | 6.6850640000  | -0.0517620000 | H | -1.6544480000 | 5.2680420000  | 1.2964090000 |
| C  | 0.6033210000  | 3.6558170000  | -0.0354560000 | H | -0.8543790000 | -2.1269820000 | 2.1512390000 |
| O  | -0.0790600000 | -3.4597770000 | 0.0002110000  | H | -3.3037310000 | -1.8397070000 | 2.1945300000 |
| C  | -3.6137460000 | -0.9616050000 | 0.0319290000  |   |               |               |              |
| O  | -4.9398720000 | -0.6116240000 | 0.0919310000  |   |               |               |              |
| C  | -0.7283180000 | 5.6193490000  | 0.0985190000  |   |               |               |              |
| C  | -0.9027760000 | -1.7100720000 | 0.1197350000  |   |               |               |              |
| O  | 4.0319010000  | -0.5513580000 | 0.1238490000  |   |               |               |              |
| C  | 0.9657530000  | 0.9225040000  | 0.1740150000  |   |               |               |              |
| I  | 1.2583870000  | -1.1976690000 | 0.3126160000  |   |               |               |              |
| C  | -0.4675790000 | 2.8393930000  | 0.3246700000  |   |               |               |              |
| C  | -0.2842360000 | 1.4599190000  | 0.4307490000  |   |               |               |              |
| H  | -0.7077200000 | -4.0078880000 | 0.4832540000  |   |               |               |              |
| H  | -1.4466250000 | 3.2511780000  | 0.5274300000  |   |               |               |              |
| H  | -1.1259600000 | 0.8374700000  | 0.7100130000  |   |               |               |              |
| H  | 4.4845650000  | -0.1944930000 | 0.8908440000  |   |               |               |              |
| H  | -1.0455730000 | 5.4357820000  | 1.1284860000  |   |               |               |              |
| C  | -3.0045500000 | -1.2911320000 | 1.2437370000  |   |               |               |              |
| C  | -1.6665900000 | -1.6444840000 | 1.3003580000  |   |               |               |              |
| H  | -3.5946230000 | -1.2528570000 | 2.1526120000  |   |               |               |              |
| H  | -1.2081580000 | -1.8743770000 | 2.2545310000  |   |               |               |              |

#### TS5-1c-Na (M06-2X, H<sub>2</sub>O)

|                  |   |              |
|------------------|---|--------------|
| $E_0 + E_{ZPE}$  | = | -1017.167987 |
| $E_0 + E_{tot}$  | = | -1017.144574 |
| $E_0 + H_{corr}$ | = | -1017.143630 |
| $E_0 + G_{corr}$ | = | -1017.224402 |

Frequency: -445.600

Coordinates:

|    |               |               |               |
|----|---------------|---------------|---------------|
| H  | -0.8633670000 | -1.2876300000 | -2.0679700000 |
| H  | -3.2842350000 | -1.0035860000 | -2.0110500000 |
| H  | -5.4600690000 | -1.6655520000 | -1.6986310000 |
| H  | -5.2144600000 | 0.0598490000  | -1.3129360000 |
| C  | -1.3881930000 | -1.4316370000 | -1.1316860000 |
| C  | -2.7742150000 | -1.2657030000 | -1.0930570000 |
| C  | -5.5546560000 | -0.9030280000 | -0.9195150000 |
| H  | 2.0111300000  | 4.0555590000  | -0.8832320000 |
| H  | 2.7193290000  | 1.6535270000  | -0.7074140000 |
| H  | -6.5960210000 | -0.8232960000 | -0.6162880000 |
| Na | 5.1358150000  | -1.6590190000 | -0.6155390000 |
| C  | 1.3389420000  | 3.3033860000  | -0.4878970000 |
| C  | 1.7298670000  | 1.9777510000  | -0.4060080000 |
| H  | -2.2931700000 | 4.9663170000  | -0.3453880000 |
| O  | 0.3465340000  | -3.4134430000 | -0.2397340000 |
| O  | -0.2209500000 | 5.0148730000  | -0.1873900000 |
| C  | 0.0656050000  | 3.6954050000  | -0.0622300000 |
| C  | -0.6840440000 | -1.7863500000 | 0.0218660000  |

#### TS5-1d (B3LYP-D3, CH<sub>2</sub>Cl<sub>2</sub>)

|                  |   |             |
|------------------|---|-------------|
| $E_0 + E_{ZPE}$  | = | -626.319026 |
| $E_0 + E_{tot}$  | = | -626.302922 |
| $E_0 + H_{corr}$ | = | -626.301977 |
| $E_0 + G_{corr}$ | = | -626.364053 |

Frequency: -344.750

Coordinates:

|   |               |               |               |
|---|---------------|---------------|---------------|
| H | 3.4600280000  | 1.7787880000  | -2.1331240000 |
| H | 1.8975610000  | -0.1238130000 | -2.1298050000 |
| C | 2.2351510000  | 0.2994590000  | -1.1913480000 |
| C | 3.1144510000  | 1.3805450000  | -1.1840930000 |
| H | 2.7454140000  | -2.2966680000 | -0.6886850000 |
| H | 0.2792940000  | 1.8532030000  | -0.1256210000 |
| H | -1.0651860000 | 3.9215880000  | -0.1227710000 |
| O | -2.7688260000 | -2.4389400000 | -0.0825700000 |
| C | -0.7989120000 | 1.7933460000  | -0.0739510000 |
| C | -1.5654290000 | 2.9608450000  | -0.0712480000 |
| I | -0.2752420000 | -1.2817720000 | -0.0168890000 |
| C | -1.4580040000 | 0.5704750000  | -0.0070710000 |
| C | -2.9560920000 | 2.8934850000  | -0.0043650000 |
| H | -3.5439100000 | 3.8046110000  | -0.0042160000 |
| H | 4.2009620000  | 2.8159110000  | 0.0091970000  |
| C | 3.5301530000  | 1.9650230000  | 0.0133670000  |
| C | 1.7902200000  | -0.2414270000 | 0.0269000000  |
| C | -2.8408280000 | 0.4718680000  | 0.0581260000  |
| C | -3.5879110000 | 1.6521970000  | 0.0599810000  |
| H | -3.2875050000 | -0.5199140000 | 0.1035860000  |
| H | -4.6698940000 | 1.5936540000  | 0.1098770000  |
| O | 2.2690320000  | -2.1797470000 | 0.1437630000  |
| H | -2.6519000000 | -3.1410560000 | 0.5685730000  |
| C | 3.0455980000  | 1.4454010000  | 1.2176310000  |
| C | 2.1726030000  | 0.3625970000  | 1.2364360000  |
| H | 3.3410740000  | 1.8950260000  | 2.1606420000  |
| H | 1.7942520000  | -0.0208190000 | 2.1757360000  |

#### TS5-1d (B3LYP-D3, H<sub>2</sub>O)

|                  |   |             |
|------------------|---|-------------|
| $E_0 + E_{ZPE}$  | = | -626.331140 |
| $E_0 + E_{tot}$  | = | -626.314705 |
| $E_0 + H_{corr}$ | = | -626.313760 |
| $E_0 + G_{corr}$ | = | -626.376973 |

Frequency: -358.810

Coordinates:

|   |              |               |               |
|---|--------------|---------------|---------------|
| H | 1.9325240000 | -0.1539830000 | -2.1252130000 |
| H | 3.5006460000 | 1.7464000000  | -2.1247820000 |

|   |               |               |               |
|---|---------------|---------------|---------------|
| C | 2.2614920000  | 0.2759660000  | -1.1872580000 |
| C | 3.1441600000  | 1.3552950000  | -1.1772870000 |
| H | 2.7050220000  | -2.3476670000 | -0.6865340000 |
| H | 0.2856590000  | 1.8537390000  | -0.1828880000 |
| H | -1.0484620000 | 3.9285660000  | -0.1713210000 |
| C | -0.7915980000 | 1.7996580000  | -0.1081100000 |
| C | -1.5520800000 | 2.9710990000  | -0.1002760000 |
| O | -2.8639760000 | -2.4471700000 | -0.0670230000 |
| I | -0.2784330000 | -1.2702600000 | -0.0192280000 |
| C | -1.4555720000 | 0.5812090000  | -0.0157080000 |
| C | -2.9413620000 | 2.9114640000  | -0.0032240000 |
| H | -3.5242210000 | 3.8254170000  | 0.0016010000  |
| H | 4.2240440000  | 2.7915660000  | 0.0187170000  |
| C | 3.5501840000  | 1.9433340000  | 0.0215240000  |
| C | 1.8056490000  | -0.2471570000 | 0.0308020000  |
| C | -2.8376910000 | 0.4899500000  | 0.0800110000  |
| C | -3.5784960000 | 1.6744870000  | 0.0858480000  |
| H | -3.2951880000 | -0.4932760000 | 0.1459220000  |
| O | 2.2537760000  | -2.2129880000 | 0.1574640000  |
| H | -4.6592330000 | 1.6226140000  | 0.1599850000  |
| H | -2.6299770000 | -3.2806010000 | 0.3584760000  |
| C | 3.0547510000  | 1.4333170000  | 1.2245750000  |
| C | 2.1765170000  | 0.3530960000  | 1.2416490000  |
| H | 3.3441710000  | 1.8862020000  | 2.1674640000  |
| H | 1.7878350000  | -0.0242340000 | 2.1788550000  |

#### TS5-1d (M06-2X, Toluene)

|                  |   |             |
|------------------|---|-------------|
| $E_0 + E_{ZPE}$  | = | -625.936449 |
| $E_0 + E_{tot}$  | = | -625.920947 |
| $E_0 + H_{corr}$ | = | -625.920003 |
| $E_0 + G_{corr}$ | = | -625.980412 |

Frequency: -342.650

Coordinates:

|   |               |               |               |
|---|---------------|---------------|---------------|
| H | -1.6972010000 | 0.0553400000  | -2.1663920000 |
| H | -3.3220450000 | 1.8950620000  | -2.1511400000 |
| C | -2.0861940000 | 0.4264890000  | -1.2253680000 |
| C | -3.0029020000 | 1.4636070000  | -1.2072860000 |
| H | 2.3366180000  | -3.2770710000 | -0.2751530000 |
| O | -2.2604410000 | -2.0491370000 | -0.1032300000 |
| H | 3.2716200000  | -0.6324150000 | -0.0551030000 |
| H | 4.7059350000  | 1.4252000000  | -0.0394790000 |
| C | 2.8451160000  | 0.3668270000  | -0.0278650000 |
| C | 3.6260840000  | 1.5209370000  | -0.0213150000 |
| C | -1.6775470000 | -0.1840110000 | -0.0183110000 |
| C | -3.5030780000 | 1.9741800000  | -0.0062520000 |
| C | 1.4630650000  | 0.5025160000  | -0.0046300000 |
| H | -4.2082240000 | 2.7958230000  | -0.0033090000 |
| C | 3.0378320000  | 2.7804230000  | 0.0097220000  |
| I | 0.2297000000  | -1.2795280000 | 0.0116190000  |
| H | 3.6549430000  | 3.6717890000  | 0.0155620000  |
| O | 2.4958030000  | -2.3788500000 | 0.0275850000  |
| C | 0.8512860000  | 1.7510420000  | 0.0287790000  |
| C | 1.6527810000  | 2.8909580000  | 0.0343930000  |
| H | -0.2255930000 | 1.8546220000  | 0.0499050000  |
| H | 1.1808520000  | 3.8664680000  | 0.0597890000  |
| H | -2.9088160000 | -2.0609490000 | 0.6079390000  |
| C | -3.0418100000 | 1.4235780000  | 1.1875600000  |
| C | -2.1177410000 | 0.3868670000  | 1.1961250000  |
| H | -3.3852650000 | 1.8243500000  | 2.1365440000  |
| H | -1.7411690000 | 0.0001950000  | 2.1368930000  |

#### TS6-1a (B3LYP-D3, CH<sub>2</sub>Cl<sub>2</sub>)

|                 |   |              |
|-----------------|---|--------------|
| $E_0 + E_{ZPE}$ | = | -1716.729072 |
|-----------------|---|--------------|

|                  |   |              |
|------------------|---|--------------|
| $E_0 + E_{tot}$  | = | -1716.703024 |
| $E_0 + H_{corr}$ | = | -1716.702080 |
| $E_0 + G_{corr}$ | = | -1716.792232 |

Frequency: -247.450

Coordinates:

|   |               |               |               |
|---|---------------|---------------|---------------|
| H | -4.5291010000 | 0.0295690000  | -2.2930660000 |
| H | -2.3706230000 | -1.1716780000 | -2.0600100000 |
| H | 1.0461820000  | 3.2003370000  | -2.0528870000 |
| H | 0.7199910000  | 0.7475380000  | -1.9417790000 |
| O | 3.0856880000  | -0.4092730000 | -1.7428940000 |
| O | -6.4778950000 | 1.1892290000  | -1.4453520000 |
| C | -4.1018070000 | -0.1468090000 | -1.3159760000 |
| C | -2.8972280000 | -0.8136410000 | -1.1872040000 |
| C | 0.7873620000  | 2.7366890000  | -1.1085580000 |
| C | 0.5933750000  | 1.3567330000  | -1.0592040000 |
| F | 5.2817410000  | 1.3703940000  | -0.6973220000 |
| O | 4.9569490000  | -1.6662500000 | -0.6693700000 |
| S | 3.7590310000  | -0.8246320000 | -0.4977470000 |
| N | -6.0228830000 | 1.0149320000  | -0.3108190000 |
| C | -4.7667220000 | 0.3048930000  | -0.1694630000 |
| H | 0.8137020000  | 4.5800310000  | -0.0042080000 |
| C | 0.6594250000  | 3.5086260000  | 0.0443970000  |
| C | -2.4071330000 | -1.0461100000 | 0.0979970000  |
| C | 0.2726780000  | 0.7918460000  | 0.1669640000  |
| C | 4.4567380000  | 0.7879220000  | 0.1914070000  |
| O | -2.5977390000 | -3.3852720000 | 0.2552660000  |
| I | -0.1035180000 | -1.3290610000 | 0.2559190000  |
| F | 3.4774900000  | 1.6577950000  | 0.4801730000  |
| O | 2.8384390000  | -1.2647060000 | 0.5810780000  |
| O | -6.5908110000 | 1.4178400000  | 0.7092210000  |
| C | -4.2333570000 | 0.1078440000  | 1.1083370000  |
| H | -2.8349940000 | -3.3940830000 | 1.1909370000  |
| C | -3.0258170000 | -0.5549700000 | 1.2477350000  |
| C | 0.3398980000  | 2.9092830000  | 1.2617810000  |
| F | 5.1560700000  | 0.5619190000  | 1.3180130000  |
| C | 0.1416340000  | 1.5310470000  | 1.3354760000  |
| H | -4.7586730000 | 0.4785200000  | 1.9772140000  |
| H | 0.2455810000  | 3.5075790000  | 2.1601270000  |
| H | -2.5983450000 | -0.7104080000 | 2.2283910000  |
| H | -0.1006340000 | 1.0587930000  | 2.2777800000  |

#### TS6-1a (B3LYP-D3, H<sub>2</sub>O)

|                  |   |              |
|------------------|---|--------------|
| $E_0 + E_{ZPE}$  | = | -1716.740999 |
| $E_0 + E_{tot}$  | = | -1716.714890 |
| $E_0 + H_{corr}$ | = | -1716.713946 |
| $E_0 + G_{corr}$ | = | -1716.804527 |

Frequency: -252.540

Coordinates:

|   |               |               |               |
|---|---------------|---------------|---------------|
| H | -4.5498860000 | 0.0168240000  | -2.2991060000 |
| H | 1.0501980000  | 3.2309740000  | -2.0574810000 |
| H | -2.3609840000 | -1.1249340000 | -2.0554450000 |
| H | 0.6769480000  | 0.7842360000  | -1.9456360000 |
| O | 3.0836120000  | -0.4627610000 | -1.7404760000 |
| O | -6.5372740000 | 1.1153240000  | -1.4602750000 |
| C | -4.1245480000 | -0.1496710000 | -1.3194770000 |
| C | -2.9026310000 | -0.7845560000 | -1.1847710000 |
| C | 0.8101340000  | 2.7683910000  | -1.1077030000 |
| C | 0.5912100000  | 1.3921560000  | -1.0569920000 |
| F | 5.3068500000  | 1.3079030000  | -0.7347550000 |
| O | 4.9558300000  | -1.7187630000 | -0.6701850000 |
| S | 3.7644050000  | -0.8656450000 | -0.4953190000 |
| N | -6.0814240000 | 0.9578080000  | -0.3239040000 |
| C | -4.8048730000 | 0.2844450000  | -0.1758170000 |

|   |               |               |              |   |               |               |              |
|---|---------------|---------------|--------------|---|---------------|---------------|--------------|
| H | 0.8991730000  | 4.6073020000  | 0.0008230000 | C | 3.4236130000  | -1.6488760000 | 0.3864640000 |
| C | 0.7268910000  | 3.5387990000  | 0.0507370000 | C | -0.9868080000 | 2.7896010000  | 0.5689310000 |
| C | -2.4175630000 | -1.0035570000 | 0.1034870000 | C | 2.5737160000  | -4.3001820000 | 0.6324100000 |
| C | 4.4813800000  | 0.7486750000  | 0.1677110000 | H | -3.7617400000 | 0.8218920000  | 0.7188520000 |
| C | 0.2914630000  | 0.8308390000  | 0.1764220000 | H | 2.2399630000  | -5.3284820000 | 0.7258750000 |
| I | -0.1142860000 | -1.2853680000 | 0.2688380000 | C | 2.5063360000  | 1.7487860000  | 0.8026820000 |
| O | -2.6082300000 | -3.3418480000 | 0.2736310000 | C | 4.3143270000  | -2.6396050000 | 0.8050510000 |
| F | 3.5127640000  | 1.6302410000  | 0.4496030000 | C | 3.8937070000  | -3.9625360000 | 0.9289570000 |
| O | 2.8526990000  | -1.2917240000 | 0.5956240000 | H | 5.3387150000  | -2.3659700000 | 1.0341640000 |
| O | -6.6651670000 | 1.3458930000  | 0.6922870000 | C | 3.7577920000  | 2.3197830000  | 1.0353330000 |
| C | -4.2706640000 | 0.1082270000  | 1.1046460000 | C | -3.0026680000 | 1.5206380000  | 1.0490230000 |
| H | -2.7105340000 | -3.3733620000 | 1.2332240000 | H | -4.7251280000 | -2.5439670000 | 1.1830480000 |
| C | -3.0466990000 | -0.5233110000 | 1.2506200000 | H | 4.5919880000  | -4.7259640000 | 1.2552540000 |
| C | 0.4266430000  | 2.9421440000  | 1.2744070000 | H | 1.7904120000  | 1.6513860000  | 1.6093950000 |
| F | 5.1848670000  | 0.5277060000  | 1.2923070000 | H | -1.5279020000 | -1.1350690000 | 1.6374670000 |
| C | 0.2032510000  | 1.5675870000  | 1.3503950000 | C | -1.8011400000 | -2.1926470000 | 1.6573750000 |
| H | -4.8060270000 | 0.4699600000  | 1.9711050000 | C | -1.0102440000 | 3.2782940000  | 1.8777820000 |
| H | 0.3649780000  | 3.5396550000  | 2.1759890000 | H | -0.9470100000 | -2.7644070000 | 2.0315860000 |
| H | -2.6162630000 | -0.6611440000 | 2.2323390000 | H | 3.9910840000  | 2.6748150000  | 2.0349300000 |
| H | -0.0269790000 | 1.0980290000  | 2.2969890000 | H | -0.2246420000 | 3.9525990000  | 2.2075760000 |

#### TS7-1d (B3LYP-D3, Toluene)

|                  |   |              |
|------------------|---|--------------|
| $E_0 + E_{ZPE}$  | = | -1245.551281 |
| $E_0 + E_{tot}$  | = | -1245.521527 |
| $E_0 + H_{corr}$ | = | -1245.520583 |
| $E_0 + G_{corr}$ | = | -1245.615336 |

Frequency: -275.21

Coordinates:

|   |               |               |               |
|---|---------------|---------------|---------------|
| H | -4.1078890000 | 0.3451970000  | -2.7854580000 |
| H | 2.9080810000  | 0.9631060000  | -2.4895990000 |
| H | 5.1086830000  | 1.9848010000  | -2.0570820000 |
| H | 0.4308460000  | 4.6567190000  | -1.9814560000 |
| H | -1.2193260000 | 4.0043830000  | -1.9336910000 |
| H | -2.2218740000 | -1.0573660000 | -1.9323690000 |
| C | -4.2485570000 | -0.2878540000 | -1.9148590000 |
| H | -6.3103370000 | 0.2818450000  | -1.6358160000 |
| C | 3.1450310000  | 1.3496490000  | -1.5064160000 |
| C | -3.1872350000 | -1.0598970000 | -1.4414660000 |
| C | -0.3811240000 | 4.3455360000  | -1.3191070000 |
| C | -5.4851650000 | -0.3216190000 | -1.2723670000 |
| C | 4.3830210000  | 1.9252420000  | -1.2511940000 |
| O | 0.5443920000  | 2.1326210000  | -1.1998380000 |
| H | -1.9688350000 | 1.5050040000  | -0.8355920000 |
| H | -0.7112050000 | 5.2062650000  | -0.7265990000 |
| O | -1.0408280000 | -2.6516850000 | -0.6049620000 |
| I | 0.6828720000  | -0.4868660000 | -0.5489710000 |
| C | 2.1840000000  | 1.2812910000  | -0.4819370000 |
| C | 0.1081980000  | 3.1948090000  | -0.4190320000 |
| C | -3.3325210000 | -1.8688590000 | -0.3137700000 |
| C | -5.6510980000 | -1.1435890000 | -0.1555350000 |
| H | 0.6204060000  | -3.5327090000 | -0.0238190000 |
| C | 4.7076910000  | 2.4153470000  | 0.0196990000  |
| C | 2.1125120000  | -2.0161860000 | 0.0999960000  |
| C | -1.9957840000 | 1.9081460000  | 0.1693000000  |
| H | 0.9503200000  | 3.5880980000  | 0.1839260000  |
| H | 5.6818580000  | 2.8499840000  | 0.2116530000  |
| C | 1.6662880000  | -3.3259540000 | 0.2118850000  |
| C | -2.1338710000 | -2.6790060000 | 0.2188860000  |
| H | 3.7576100000  | -0.6246990000 | 0.2949900000  |
| C | -4.5847600000 | -1.9079470000 | 0.3135040000  |
| H | -2.5225200000 | -3.7199310000 | 0.3337980000  |
| H | -6.6113010000 | -1.1847440000 | 0.3498030000  |

#### TS7-1d (M062-X, Toluene)

|                  |   |              |
|------------------|---|--------------|
| $E_0 + E_{ZPE}$  | = | -1244.894236 |
| $E_0 + E_{tot}$  | = | -1244.864896 |
| $E_0 + H_{corr}$ | = | -1244.863952 |
| $E_0 + G_{corr}$ | = | -1244.956734 |

Frequency: -324.31

Coordinates:

|   |               |               |               |
|---|---------------|---------------|---------------|
| H | -4.1543180000 | 0.3272480000  | -2.7881590000 |
| H | 2.9105290000  | 0.8156710000  | -2.4631590000 |
| H | 5.1267710000  | 1.8203010000  | -2.0896180000 |
| H | 0.5015380000  | 4.6445920000  | -1.9713590000 |
| H | -1.1535490000 | 4.0045910000  | -1.9359140000 |
| H | -2.2309350000 | -1.0207280000 | -1.9268410000 |
| C | -4.2756830000 | -0.2991000000 | -1.9105590000 |
| H | -6.3471240000 | 0.2215300000  | -1.6335460000 |
| C | 3.1605070000  | 1.2457340000  | -1.5014210000 |
| C | -3.1961550000 | -1.0400340000 | -1.4332570000 |
| C | -0.3158740000 | 4.3363180000  | -1.3162310000 |
| C | 4.4052290000  | 1.8116940000  | -1.2790940000 |
| C | -5.5071080000 | -0.3568250000 | -1.2658420000 |
| O | 0.5893600000  | 2.1221280000  | -1.2040650000 |
| H | -1.9107840000 | 1.5062390000  | -0.8998560000 |
| H | -0.6404100000 | 5.1925730000  | -0.7165240000 |
| O | -1.0177350000 | -2.5306110000 | -0.5779480000 |
| I | 0.6576250000  | -0.4804430000 | -0.4784740000 |
| C | 2.2083870000  | 1.2456290000  | -0.4699250000 |
| C | 0.1597640000  | 3.1763810000  | -0.4285770000 |
| C | -3.3220090000 | -1.8392380000 | -0.2996720000 |
| H | 0.6335080000  | -3.5539890000 | -0.1908220000 |
| C | -5.6517820000 | -1.1705040000 | -0.1432810000 |
| C | 4.7460730000  | 2.3528880000  | -0.0361540000 |
| C | 1.6593750000  | -3.3341410000 | 0.1014010000  |
| C | -1.9583840000 | 1.9028380000  | 0.1096010000  |
| C | 2.0638400000  | -2.0069610000 | 0.1219760000  |
| H | 5.7275860000  | 2.7795350000  | 0.1290200000  |
| H | 0.9921890000  | 3.5629280000  | 0.1936560000  |

|   |               |               |              |   |               |               |               |
|---|---------------|---------------|--------------|---|---------------|---------------|---------------|
| C | -2.1076070000 | -2.6094900000 | 0.2383290000 | C | 4.5738330000  | 4.3932790000  | -0.9016710000 |
| C | -4.5689610000 | -1.9028820000 | 0.3301680000 | C | 5.4810820000  | -3.9857710000 | -0.8787790000 |
| H | -2.4595990000 | -3.6605430000 | 0.3489560000 | H | -8.1001050000 | -1.5446260000 | -0.7594680000 |
| H | -6.6099890000 | -1.2320070000 | 0.3618430000 | H | 4.0829240000  | 5.3440980000  | -0.6700760000 |
| H | 2.2730560000  | -5.3535230000 | 0.4666180000 | C | -5.9706190000 | -1.2489130000 | -0.6557010000 |
| C | 2.5770770000  | -4.3127200000 | 0.4771340000 | C | 3.6931300000  | 3.2163670000  | -0.5520960000 |
| C | 3.3494770000  | -1.6342160000 | 0.4987920000 | C | -3.4249870000 | -0.9864190000 | -0.5030900000 |
| H | 3.6603170000  | -0.5971800000 | 0.5091880000 | H | 2.3490310000  | -5.2236260000 | -0.4523760000 |
| C | -0.9553550000 | 2.7762260000  | 0.5356500000 | C | -7.1493180000 | -1.9593650000 | -0.4379870000 |
| H | -3.7535260000 | 0.8385980000  | 0.6117730000 | C | 3.1854860000  | -4.5343630000 | -0.3966610000 |
| C | 2.5438670000  | 1.7592400000  | 0.7898730000 | H | 5.5176290000  | 4.3745990000  | -0.3431980000 |
| C | 3.8681480000  | -3.9667510000 | 0.8616460000 | C | 5.3089220000  | -2.7489910000 | -0.2604790000 |
| C | 4.2498800000  | -2.6300260000 | 0.8711230000 | H | -3.6696240000 | 0.0729180000  | -0.2534310000 |
| C | -2.9924410000 | 1.5290280000  | 0.9606280000 | C | -4.7313430000 | -1.7580850000 | -0.2480570000 |
| C | 3.8041080000  | 2.3199400000  | 0.9861610000 | H | 6.1366010000  | -2.0460110000 | -0.2210870000 |
| H | 4.5746840000  | -4.7354470000 | 1.1530470000 | C | -3.8136500000 | 4.9975070000  | -0.0651710000 |
| H | 5.2531850000  | -2.3485810000 | 1.1694390000 | C | -2.9427540000 | 3.7647720000  | -0.0234160000 |
| H | -4.6919640000 | -2.5375930000 | 1.2035160000 | C | -1.2741520000 | 1.5302460000  | 0.0768900000  |
| H | 1.8336280000  | 1.7032910000  | 1.6070660000 | C | 2.0828960000  | 1.0204750000  | 0.1395880000  |
| H | -1.5938830000 | -1.0347060000 | 1.6512650000 | C | -7.1088930000 | -3.2011340000 | 0.1993280000  |
| C | -1.8086060000 | -2.1070330000 | 1.6715550000 | I | 0.0213180000  | -0.2036720000 | 0.2054930000  |
| C | -1.0108610000 | 3.2682620000  | 1.8387960000 | C | 3.0193680000  | -3.2946830000 | 0.2207870000  |
| H | 4.0514470000  | 2.7143980000  | 1.9665850000 | O | -2.3716730000 | -1.4570510000 | 0.2301750000  |
| H | -0.9270490000 | -2.6326860000 | 2.0500080000 | H | -3.2513660000 | 5.8832420000  | 0.2513370000  |
| H | -0.2295180000 | 3.9390100000  | 2.1863070000 | C | 4.0784420000  | -2.3874880000 | 0.2991480000  |
| C | -3.0356490000 | 2.0270730000  | 2.2616290000 | H | 4.3990440000  | -0.2843070000 | 0.3358480000  |
| H | -2.6415220000 | -2.2742690000 | 2.3616550000 | H | -8.0246090000 | -3.7570510000 | 0.3735250000  |
| C | -2.0429000000 | 2.8976000000  | 2.6989270000 | C | -4.7047920000 | -2.9955210000 | 0.3978580000  |
| H | -3.8339510000 | 1.7277800000  | 2.9312810000 | H | -4.6760350000 | 4.8996830000  | 0.5977520000  |
| H | -2.0656090000 | 3.2807170000  | 3.7135090000 | C | -5.8809490000 | -3.7140090000 | 0.6164810000  |

**TS7-1e (B3LYP-D3, Toluene)**

|                  |   |              |
|------------------|---|--------------|
| $E_0 + E_{ZPE}$  | = | -1481.365809 |
| $E_0 + E_{tot}$  | = | -1481.326081 |
| $E_0 + H_{corr}$ | = | -1481.325137 |
| $E_0 + G_{corr}$ | = | -1481.443793 |

Frequency: -250.16

Coordinates:

|   |               |               |               |
|---|---------------|---------------|---------------|
| H | -0.5740790000 | 2.7837100000  | -3.0553910000 |
| H | 3.4205470000  | -0.0891850000 | -2.8186630000 |
| H | -3.9590730000 | -0.6057890000 | -2.6258050000 |
| H | -0.4557120000 | 1.0765120000  | -2.6119950000 |
| H | 1.6681720000  | -0.1051830000 | -2.5804270000 |
| H | 4.0794450000  | 2.1217270000  | -2.3582600000 |
| H | -2.9195080000 | -2.0253250000 | -2.3459170000 |
| C | -0.3368670000 | 2.0973720000  | -2.2407180000 |
| H | -2.2426730000 | -0.3899300000 | -2.2220760000 |
| C | 2.6332530000  | -0.1302540000 | -2.0624470000 |
| C | -3.1288430000 | -0.9991390000 | -2.0272210000 |
| H | 0.7145260000  | 2.2309200000  | -1.9773790000 |
| H | 4.8243730000  | 4.3988080000  | -1.9657880000 |
| H | -2.0641280000 | 4.1123130000  | -1.9501530000 |
| H | 2.6978150000  | -1.0912870000 | -1.5511070000 |
| H | 4.5455870000  | -5.8484310000 | -1.4328610000 |
| C | 3.5557440000  | 2.1236110000  | -1.4049790000 |
| H | 6.4414490000  | -4.2452810000 | -1.3133990000 |
| H | -6.0092340000 | -0.2787010000 | -1.1442290000 |
| C | 2.7609180000  | 1.0133960000  | -1.0893680000 |
| C | -2.0799990000 | 3.4669020000  | -1.0768970000 |
| H | -4.1812950000 | 5.1908690000  | -1.0764380000 |
| C | -1.2322230000 | 2.3547050000  | -1.0557050000 |
| C | 4.4170050000  | -4.8864120000 | -0.9478650000 |

**TS7-1e (M062-X, Toluene)**

|                  |   |              |
|------------------|---|--------------|
| $E_0 + E_{ZPE}$  | = | -1480.569330 |
| $E_0 + E_{tot}$  | = | -1480.530088 |
| $E_0 + H_{corr}$ | = | -1480.529144 |
| $E_0 + G_{corr}$ | = | -1480.643617 |

Frequency: -334.06

Coordinates:

|   |               |              |               |
|---|---------------|--------------|---------------|
| H | -0.4144780000 | 2.7421020000 | -3.0626880000 |
|---|---------------|--------------|---------------|





|   |               |               |              |   |               |               |              |
|---|---------------|---------------|--------------|---|---------------|---------------|--------------|
| H | -7.7254410000 | 0.7759130000  | 0.5193830000 | I | 0.0195660000  | -0.9070010000 | 0.2599940000 |
| C | -3.2860540000 | 2.0391770000  | 0.8263950000 | O | -2.2325300000 | -2.1167160000 | 0.2604680000 |
| C | -4.9917690000 | -1.2286830000 | 0.8333460000 | C | 1.6649930000  | 0.9897180000  | 0.2763910000 |
| H | 2.6526950000  | -0.1127310000 | 0.8631200000 | O | 2.3460420000  | -2.0600160000 | 0.4533730000 |
| C | 1.9325930000  | 3.3554960000  | 0.9027000000 | H | -7.3517290000 | 1.1308130000  | 0.4556400000 |
| C | -2.3909310000 | 0.9749930000  | 0.9237060000 | C | 5.1804760000  | 0.2840040000  | 0.4724200000 |
| C | 3.1667580000  | -1.2026750000 | 0.9865620000 | C | -4.8785560000 | -1.1826630000 | 0.7348400000 |
| C | -6.1704460000 | -0.5692410000 | 1.1770920000 | H | 2.5885600000  | -0.1013930000 | 0.8604910000 |
| C | 1.5691880000  | 2.0443860000  | 1.2024220000 | C | 1.7069280000  | 3.3106420000  | 0.9139780000 |
| H | 5.0303860000  | 0.7924140000  | 1.2842040000 | C | 3.1642990000  | -1.1608200000 | 0.9771800000 |
| H | -4.1617000000 | 2.0542650000  | 1.4649590000 | C | -3.2054910000 | 1.9554290000  | 0.9999730000 |
| H | -4.4557220000 | -1.8393020000 | 1.5513580000 | C | -5.9932960000 | -0.4249380000 | 1.0741640000 |
| H | -2.5770410000 | 0.1515490000  | 1.5987600000 | C | -2.3216270000 | 0.8834190000  | 1.0794450000 |
| H | 1.7537010000  | 4.1369080000  | 1.6347430000 | C | 1.3779810000  | 1.9910190000  | 1.2050930000 |
| H | 1.0980060000  | 1.8155140000  | 2.1516940000 | H | 4.8395850000  | 0.9705130000  | 1.2428200000 |
| H | -6.5853700000 | -0.6867200000 | 2.1739080000 | H | -4.4554180000 | -1.9039920000 | 1.4262460000 |
| C | 3.3419750000  | -1.3168690000 | 2.5143650000 | H | 1.4872310000  | 4.0849200000  | 1.6412880000 |
| H | 3.8101730000  | -2.2775450000 | 2.7530120000 | H | -3.9900440000 | 2.0556500000  | 1.7409890000 |
| H | 3.9584740000  | -0.5160490000 | 2.9326030000 | H | -2.4264500000 | 0.1345800000  | 1.8545270000 |
| H | 2.3569670000  | -1.2897260000 | 2.9867500000 | H | -6.4753650000 | -0.5708230000 | 2.0356100000 |

#### TS8-1d (M062-X, Toluene)

|                  |   |              |
|------------------|---|--------------|
| $E_0 + E_{ZPE}$  | = | -1244.883789 |
| $E_0 + E_{tot}$  | = | -1244.854203 |
| $E_0 + H_{corr}$ | = | -1244.853259 |
| $E_0 + G_{corr}$ | = | -1244.946129 |

Frequency: -637.54

Coordinates:

|   |               |               |               |
|---|---------------|---------------|---------------|
| H | -4.0871460000 | -2.9520760000 | -2.4088910000 |
| H | 6.3108310000  | -2.0839730000 | -2.3561200000 |
| H | -4.2492900000 | 0.1039680000  | -2.3280560000 |
| H | 3.0310450000  | 2.8836780000  | -2.1788980000 |
| H | 7.6297870000  | -0.0475960000 | -1.8518170000 |
| H | -2.0378590000 | 3.4202660000  | -1.8285270000 |
| H | -2.6025070000 | -3.7383540000 | -1.8062600000 |
| H | -6.2315840000 | 1.4613260000  | -1.7327370000 |
| H | -0.4484680000 | 1.5340400000  | -1.6811810000 |
| H | 2.4753320000  | 0.5291640000  | -1.6634490000 |
| H | -2.4610030000 | -1.2697540000 | -1.6115130000 |
| C | 5.9962470000  | -1.4190120000 | -1.5589540000 |
| C | -3.4778710000 | -3.1505850000 | -1.5200140000 |
| C | -4.7496430000 | -0.0566170000 | -1.3765610000 |
| C | 6.7390810000  | -0.2763640000 | -1.2774980000 |
| C | 2.5701000000  | 2.6391380000  | -1.2279130000 |
| C | -5.8618040000 | 0.7117190000  | -1.0406880000 |
| H | 4.2439160000  | -2.5837840000 | -1.0399040000 |
| C | -2.1178410000 | 2.7143970000  | -1.0098140000 |
| C | 2.2525640000  | 1.3137700000  | -0.9478640000 |
| C | -1.2266010000 | 1.6474040000  | -0.9352510000 |
| C | -3.0077480000 | -1.8524990000 | -0.8324540000 |
| C | 4.8480360000  | -1.7094990000 | -0.8260250000 |
| H | -4.0696190000 | -3.7362230000 | -0.8102270000 |
| H | 2.5418780000  | 4.6756550000  | -0.5276550000 |
| C | -4.2406550000 | -1.0074870000 | -0.4946410000 |
| C | 2.2996640000  | 3.6439860000  | -0.3020920000 |
| C | 6.3229320000  | 0.5799520000  | -0.2603480000 |
| H | -3.8024090000 | 3.6973990000  | -0.1063430000 |
| H | 6.8830270000  | 1.4837170000  | -0.0470120000 |
| C | -3.1040280000 | 2.8710490000  | -0.0413160000 |
| C | -1.3364650000 | 0.7431220000  | 0.1124210000  |
| C | -6.4884870000 | 0.5311800000  | 0.1879200000  |
| C | 4.4365660000  | -0.8697250000 | 0.2070940000  |

#### TS8-1e (B3LYP-D3, Toluene)

|                  |   |              |
|------------------|---|--------------|
| $E_0 + E_{ZPE}$  | = | -1481.363727 |
| $E_0 + E_{tot}$  | = | -1481.324235 |
| $E_0 + H_{corr}$ | = | -1481.323291 |
| $E_0 + G_{corr}$ | = | -1481.437878 |

Frequency: -462.81

Coordinates:

|   |               |               |               |
|---|---------------|---------------|---------------|
| H | -0.5396300000 | 2.5265240000  | -3.0205680000 |
| H | 1.9735250000  | -0.1079990000 | -2.8619040000 |
| H | 3.7057890000  | -0.3945840000 | -2.6419950000 |
| H | -0.3824330000 | 0.8200830000  | -2.5869120000 |
| H | -4.2417030000 | 0.0474070000  | -2.5854260000 |
| H | -3.5116580000 | -1.5787770000 | -2.5805340000 |
| H | -2.5070140000 | -0.1536680000 | -2.2576460000 |
| C | -0.2259690000 | 1.8398820000  | -2.2318810000 |
| H | 4.0559890000  | 2.0161600000  | -2.2147920000 |
| C | 2.7480330000  | -0.3341900000 | -2.1196600000 |
| C | -3.4944230000 | -0.5943330000 | -2.1035480000 |
| H | 0.8456090000  | 1.9708040000  | -2.0730970000 |
| H | 2.5201870000  | -1.3090200000 | -1.6931160000 |
| H | 6.0561720000  | -4.0447550000 | -1.6662940000 |
| H | -1.5674060000 | 4.0587510000  | -1.6467640000 |
| C | 3.5084510000  | 1.9152760000  | -1.2806880000 |
| H | 5.1794910000  | 4.0380410000  | -1.2663040000 |
| H | 3.6779900000  | 4.9548230000  | -1.1449510000 |
| C | 2.7829900000  | 0.7408010000  | -1.0608790000 |
| H | 7.7890990000  | -2.3767780000 | -1.0454460000 |
| C | 5.8085280000  | -3.2292040000 | -0.9940290000 |
| C | -0.9908410000 | 2.1123380000  | -0.9615520000 |
| H | -6.1441730000 | 0.5234880000  | -0.9496150000 |
| C | -1.6425010000 | 3.3453120000  | -0.8312590000 |
| H | 3.7355430000  | -3.8130720000 | -0.7705750000 |
| C | 6.7839760000  | -2.2941830000 | -0.6453120000 |
| C | 4.3114070000  | 4.2243990000  | -0.6282990000 |
| H | -8.4331160000 | -0.3524090000 | -0.6044910000 |
| C | -6.2855630000 | -0.4972170000 | -0.6038750000 |

|   |               |               |               |   |               |               |               |
|---|---------------|---------------|---------------|---|---------------|---------------|---------------|
| C | -3.7348260000 | -0.7591580000 | -0.5797130000 | H | -3.4250070000 | -1.4204820000 | -2.5432400000 |
| H | -3.1915090000 | 5.4984510000  | -0.5452230000 | H | -4.1633480000 | 0.2020750000  | -2.5263060000 |
| C | 4.5152790000  | -3.1156130000 | -0.4884550000 | H | -0.1549190000 | 0.6749180000  | -2.4214430000 |
| C | -7.5747970000 | -0.9881040000 | -0.4078820000 | H | 3.7272010000  | -0.6841950000 | -2.3982940000 |
| C | -5.1612610000 | -1.2937970000 | -0.3538280000 | H | 3.9470560000  | 1.8715720000  | -2.2612210000 |
| C | 3.5536820000  | 2.9491930000  | -0.3436120000 | C | -0.1479090000 | 1.7421620000  | -2.1977470000 |
| H | -3.7565990000 | 0.2769600000  | -0.1648180000 | H | -2.4365950000 | -0.0000990000 | -2.1500530000 |
| I | -0.1178030000 | -0.7423660000 | -0.0082800000 | H | 0.8933260000  | 2.0597960000  | -2.1096070000 |
| O | -2.7785930000 | -1.5345680000 | 0.0121580000  | C | 2.7131790000  | -0.4839550000 | -2.0418850000 |
| C | -7.7635500000 | -2.2947710000 | 0.0471430000  | C | -3.4276560000 | -0.4486010000 | -2.0409150000 |
| C | -1.0970350000 | 1.1994150000  | 0.0956920000  | H | 5.7776460000  | -4.0524980000 | -1.8068130000 |
| C | -5.3621400000 | -2.5953350000 | 0.1103010000  | H | -1.4565880000 | 3.9840470000  | -1.6899550000 |
| C | 2.0914030000  | 0.6156010000  | 0.1516850000  | H | 2.3124530000  | -1.4082450000 | -1.6286120000 |
| O | 1.8098510000  | -2.5491560000 | 0.1945330000  | H | 4.9544350000  | 3.9821050000  | -1.5335070000 |
| H | -8.7659450000 | -2.6802250000 | 0.2038850000  | H | 7.5213720000  | -2.3286840000 | -1.4427690000 |
| C | 6.4541340000  | -1.2455340000 | 0.2142570000  | C | 3.4243120000  | 1.8050130000  | -1.3094490000 |
| H | 4.6641410000  | 4.6943850000  | 0.2936060000  | H | 3.4898180000  | 4.9014490000  | -1.1825830000 |
| C | -2.3830820000 | 3.6782910000  | 0.2989460000  | C | 5.5848990000  | -3.2198070000 | -1.1392050000 |
| C | -6.6505760000 | -3.0943000000 | 0.3058600000  | H | -6.1380850000 | 0.5355900000  | -1.0657890000 |
| H | -4.4810420000 | -3.1896510000 | 0.3225470000  | C | 2.7301920000  | 0.6280850000  | -1.0226890000 |
| C | 4.1787500000  | -2.0766770000 | 0.3830380000  | C | -0.9090050000 | 2.0577380000  | -0.9360110000 |
| C | -3.0439110000 | 5.0295320000  | 0.4305000000  | C | 6.5666010000  | -2.2523870000 | -0.9348930000 |
| H | 7.2007380000  | -0.5030270000 | 0.4770920000  | H | -8.4071560000 | -0.4259120000 | -0.8572360000 |
| H | -6.7868030000 | -4.1093350000 | 0.6673950000  | C | -1.5451730000 | 3.2981780000  | -0.8516990000 |
| C | 5.1621320000  | -1.1410050000 | 0.7247010000  | C | 4.1844370000  | 4.1579800000  | -0.7802200000 |
| H | 2.5533530000  | -0.7659650000 | 0.7791290000  | C | -6.2627100000 | -0.4869590000 | -0.7182120000 |
| C | 2.8634940000  | 2.7732220000  | 0.8563320000  | H | 3.5655610000  | -3.8369990000 | -0.6681840000 |
| C | 2.7535540000  | -1.9478450000 | 0.9052030000  | H | -3.4503980000 | 5.2719630000  | -0.6034580000 |
| H | -4.0180190000 | 4.9496900000  | 0.9202030000  | C | -7.5395070000 | -1.0245580000 | -0.5990000000 |
| H | -2.4303890000 | 5.7082860000  | 1.0334580000  | C | -3.7097620000 | -0.6649480000 | -0.5345140000 |
| C | 2.1292880000  | 1.6140330000  | 1.1299770000  | C | 4.3559130000  | -3.1146130000 | -0.4981430000 |
| C | -1.8771760000 | 1.4751280000  | 1.2329220000  | C | 3.4649600000  | 2.8805180000  | -0.4287860000 |
| C | -2.4964090000 | 2.7261940000  | 1.3108410000  | C | -5.1294510000 | -1.2364640000 | -0.3896430000 |
| H | 4.9022230000  | -0.3094100000 | 1.3719680000  | C | -7.7061070000 | -2.3312870000 | -0.1434040000 |
| H | 2.9053490000  | 3.5508590000  | 1.6152870000  | H | -3.7749300000 | 0.3598080000  | -0.0891590000 |
| H | -2.5568760000 | -0.4395770000 | 1.8753270000  | C | 6.3127280000  | -1.1834630000 | -0.0798500000 |
| H | -3.1031120000 | 2.9481760000  | 2.1839440000  | H | -8.7001600000 | -2.7541240000 | -0.0471040000 |
| C | -2.1233600000 | 0.4640900000  | 2.3220060000  | O | -2.7620030000 | -1.4348440000 | 0.0532170000  |
| C | 2.6584440000  | -2.1701370000 | 2.4301350000  | H | 7.0664980000  | -0.4188700000 | 0.0721300000  |
| H | 0.4411440000  | 1.9101410000  | 2.4320840000  | C | -5.3085320000 | -2.5373410000 | 0.0752940000  |
| C | 1.4377130000  | 1.4621210000  | 2.4607460000  | H | 4.6610700000  | 4.5969840000  | 0.0988650000  |
| H | 2.8857270000  | -3.2176450000 | 2.6546880000  | I | -0.0843920000 | -0.7517740000 | 0.1351350000  |
| H | 1.3213000000  | 0.4112000000  | 2.7258450000  | C | -1.0365460000 | 1.1791060000  | 0.1446080000  |
| H | 1.6356600000  | -1.9663060000 | 2.7539940000  | C | -6.5848300000 | -3.0831420000 | 0.1940420000  |
| H | -1.1948900000 | 0.1699630000  | 2.8189170000  | C | 2.0607950000  | 0.5368360000  | 0.2047350000  |
| H | 3.3496450000  | -1.5343580000 | 2.9917220000  | C | -2.2886460000 | 3.6756260000  | 0.2604290000  |
| H | -2.8003550000 | 0.8699820000  | 3.0762660000  | C | -2.9311770000 | 5.0373990000  | 0.3282410000  |
| H | 2.0044900000  | 1.9570300000  | 3.2535620000  | H | -4.4152920000 | -3.0892850000 | 0.3459960000  |
|   |               |               |               | C | 4.0965830000  | -2.0510980000 | 0.3657890000  |
|   |               |               |               | O | 1.7351730000  | -2.5228270000 | 0.4255550000  |
|   |               |               |               | H | -2.1779600000 | 5.8135950000  | 0.4898570000  |
|   |               |               |               | H | -6.7064480000 | -4.0983770000 | 0.5578090000  |
|   |               |               |               | C | 5.0858040000  | -1.0868380000 | 0.5687020000  |
|   |               |               |               | C | 2.8028710000  | 2.7433500000  | 0.7915850000  |
|   |               |               |               | H | 2.5227440000  | -0.7137530000 | 0.8664080000  |
|   |               |               |               | C | 2.7350290000  | -1.9271920000 | 1.0219780000  |
|   |               |               |               | C | 2.1070430000  | 1.5870180000  | 1.1344420000  |
|   |               |               |               | H | -3.6520320000 | 5.0929280000  | 1.1449300000  |
|   |               |               |               | H | 4.8761160000  | -0.2361100000 | 1.2121340000  |
|   |               |               |               | C | -1.8291570000 | 1.4977860000  | 1.2565780000  |
|   |               |               |               | C | -2.4283840000 | 2.7579270000  | 1.2955030000  |

**TSB-1e (M062-X, Toluene)**

|                               |   |              |
|-------------------------------|---|--------------|
| $\epsilon_0 + \epsilon_{ZPE}$ | = | -1480.559973 |
| $\epsilon_0 + E_{tot}$        | = | -1480.521064 |
| $\epsilon_0 + H_{corr}$       | = | -1480.520120 |
| $\epsilon_0 + G_{corr}$       | = | -1480.631707 |

Frequency: -915.66  
Coordinates:

|   |               |               |               |
|---|---------------|---------------|---------------|
| H | -0.5977550000 | 2.2696500000  | -3.0406240000 |
| H | 2.1015780000  | -0.1942850000 | -2.9036860000 |

|   |               |               |              |
|---|---------------|---------------|--------------|
| H | 2.8445730000  | 3.5547860000  | 1.5143550000 |
| H | -2.5530400000 | -0.3836530000 | 1.9151400000 |
| H | -3.0417440000 | 3.0132280000  | 2.1546390000 |
| C | -2.1112510000 | 0.5167050000  | 2.3610910000 |
| H | 0.4284050000  | 1.8379990000  | 2.4553400000 |
| C | 1.4584090000  | 1.4728390000  | 2.4877880000 |
| C | 2.7851690000  | -2.0704270000 | 2.5495450000 |
| H | 3.0726090000  | -3.0967160000 | 2.7997360000 |
| H | 1.4376890000  | 0.4341490000  | 2.8233680000 |
| H | -1.1969620000 | 0.2177500000  | 2.8815360000 |
| H | 1.7880010000  | -1.8878450000 | 2.9564780000 |
| H | 3.5019940000  | -1.3843960000 | 3.0086150000 |
| H | -2.7953750000 | 0.9535150000  | 3.0895500000 |
| H | 2.0023090000  | 2.0649290000  | 3.2259460000 |

#### TS9-1d (B3LYP-D3, Toluene)

|                  |   |             |
|------------------|---|-------------|
| $E_0 + E_{ZPE}$  | = | -859.999203 |
| $E_0 + E_{tot}$  | = | -859.978818 |
| $E_0 + H_{corr}$ | = | -859.977873 |
| $E_0 + G_{corr}$ | = | -860.052669 |

Frequency: -315.15

Coordinates:

|   |               |               |               |
|---|---------------|---------------|---------------|
| H | -4.8140180000 | -0.3759730000 | -3.4190890000 |
| H | 3.9264590000  | -1.0987000000 | -3.2599030000 |
| C | -4.3058510000 | -0.2971680000 | -2.4643320000 |
| H | -4.4417710000 | 1.8511400000  | -2.3840390000 |
| H | -4.0068290000 | -2.4187170000 | -2.2619890000 |
| H | 0.3257920000  | 3.1245950000  | -2.2352310000 |
| C | 3.7998290000  | -0.8500230000 | -2.2122210000 |
| H | 1.7901770000  | -1.6164320000 | -2.1264240000 |
| H | 5.7658210000  | -0.0015340000 | -2.0064730000 |
| C | -4.0991570000 | 0.9534080000  | -1.8806990000 |
| C | -3.8512790000 | -1.4432490000 | -1.8132400000 |
| H | -0.4337520000 | 0.8553020000  | -1.5830110000 |
| C | 2.5946330000  | -1.1451800000 | -1.5741900000 |
| C | 4.8317590000  | -0.2332830000 | -1.5077250000 |
| C | 0.4644140000  | 2.7864370000  | -1.2143420000 |
| C | 0.0383130000  | 1.5063110000  | -0.8590250000 |
| C | -3.4482570000 | 1.0516420000  | -0.6534720000 |
| C | -3.1962510000 | -1.3409570000 | -0.5867470000 |
| H | 1.3956430000  | 4.6116010000  | -0.5569280000 |
| C | 1.0600440000  | 3.6221500000  | -0.2700420000 |
| C | 2.4359280000  | -0.8226670000 | -0.2291930000 |
| H | -3.2767050000 | 2.0293960000  | -0.2152620000 |
| C | 4.6625830000  | 0.0865270000  | -0.1614150000 |
| H | -2.8288310000 | -2.2200970000 | -0.0717810000 |
| C | -2.9979610000 | -0.0954700000 | 0.0127890000  |
| H | 5.4632070000  | 0.5666340000  | 0.3899720000  |
| C | 0.2119580000  | 1.1038480000  | 0.4573850000  |
| C | 3.4620890000  | -0.2085520000 | 0.4834080000  |
| I | 0.5382090000  | -1.2870820000 | 0.7581110000  |
| C | 1.2281700000  | 3.1824090000  | 1.0420970000  |
| H | -1.3722040000 | 0.7327250000  | 1.0486820000  |
| C | -2.2359390000 | 0.0096670000  | 1.3299020000  |
| C | 0.8092350000  | 1.9052040000  | 1.4202710000  |
| H | 3.3306400000  | 0.0468980000  | 1.5277530000  |
| O | -1.6491500000 | -1.1273240000 | 1.7447210000  |
| H | 1.6884640000  | 3.8284060000  | 1.7815080000  |
| H | -3.3800620000 | 1.7091610000  | 2.1247400000  |
| H | 0.9333540000  | 1.5576890000  | 2.4378620000  |
| C | -3.0002530000 | 0.7372320000  | 2.4481070000  |
| H | -3.8458920000 | 0.1213160000  | 2.7657290000  |

|   |               |              |              |
|---|---------------|--------------|--------------|
| H | -2.3354090000 | 0.8807780000 | 3.3023720000 |
|---|---------------|--------------|--------------|

#### TS9-1d (M062-X, Toluene)

|                  |   |             |
|------------------|---|-------------|
| $E_0 + E_{ZPE}$  | = | -859.530377 |
| $E_0 + E_{tot}$  | = | -859.510218 |
| $E_0 + H_{corr}$ | = | -859.509274 |
| $E_0 + G_{corr}$ | = | -859.582461 |

Frequency: -456.93

Coordinates:

|   |               |               |               |
|---|---------------|---------------|---------------|
| H | -4.6676800000 | -0.4499670000 | -2.8344200000 |
| H | 4.0724710000  | 2.0606670000  | -2.2154380000 |
| H | 1.9347720000  | 0.8339770000  | -2.0330410000 |
| H | -5.5628090000 | 1.7151690000  | -2.0299360000 |
| C | -4.3626860000 | -0.0630080000 | -1.8686720000 |
| C | 3.9649730000  | 1.2737860000  | -1.4783250000 |
| H | -3.0520020000 | -1.7265800000 | -1.4228400000 |
| C | -4.8678750000 | 1.1524430000  | -1.4177400000 |
| C | 2.7626920000  | 0.5808290000  | -1.3806730000 |
| H | -1.0227150000 | 1.1072920000  | -1.2139420000 |
| C | -3.4655250000 | -0.7836770000 | -1.0848000000 |
| H | -0.5964310000 | 3.5358990000  | -1.0111520000 |
| H | 5.9595920000  | 1.4996280000  | -0.7116950000 |
| C | 5.0250790000  | 0.9570750000  | -0.6343220000 |
| C | 2.6306300000  | -0.4273530000 | -0.4329210000 |
| C | -0.4430210000 | 1.4950860000  | -0.3840150000 |
| C | -0.2042210000 | 2.8617220000  | -0.2585760000 |
| I | 0.76444070000 | -1.4929390000 | -0.2307540000 |
| C | -4.4721230000 | 1.6452010000  | -0.1766880000 |
| C | -3.0756080000 | -0.3032150000 | 0.1633710000  |
| H | -4.8525580000 | 2.5968600000  | 0.1763680000  |
| C | 4.8862320000  | -0.0557080000 | 0.3078760000  |
| O | -1.4428330000 | -2.0591130000 | 0.3504350000  |
| C | 3.6842680000  | -0.7512140000 | 0.4131290000  |
| C | 0.0630020000  | 0.6444540000  | 0.5902540000  |
| C | -3.5813650000 | 0.9217260000  | 0.6064960000  |
| C | 0.5294660000  | 3.3562670000  | 0.8139670000  |
| H | 0.7173220000  | 4.4191780000  | 0.8999030000  |
| H | 5.7096050000  | -0.3042080000 | 0.9669310000  |
| C | -2.0450460000 | -1.0570630000 | 0.9823250000  |
| H | -1.2192320000 | -0.2205150000 | 1.1236100000  |
| H | 3.5730080000  | -1.5341020000 | 1.1548490000  |
| H | -3.2549510000 | 1.3237550000  | 1.5610510000  |
| C | 0.8037270000  | 1.1107640000  | 1.6686850000  |
| C | 1.0257070000  | 2.4802970000  | 1.7757620000  |
| H | -3.2749740000 | -2.1377170000 | 2.3772470000  |
| H | 1.2014980000  | 0.4272750000  | 2.4091760000  |
| C | -2.4818900000 | -1.3869390000 | 2.4128880000  |
| H | 1.5940430000  | 2.8580030000  | 2.6177040000  |
| H | -2.8545450000 | -0.5101930000 | 2.9453960000  |
| H | -1.6338380000 | -1.8045970000 | 2.9586110000  |

#### TS9-1e (B3LYP-D3, Toluene)

|                  |   |              |
|------------------|---|--------------|
| $E_0 + E_{ZPE}$  | = | -1095.820908 |
| $E_0 + E_{tot}$  | = | -1095.790889 |
| $E_0 + H_{corr}$ | = | -1095.789945 |
| $E_0 + G_{corr}$ | = | -1095.882647 |

Frequency: -317.18

Coordinates:

|   |               |              |               |
|---|---------------|--------------|---------------|
| H | -2.6373600000 | 1.6114630000 | -2.9747380000 |
| H | -1.5866440000 | 0.1939910000 | -2.8795810000 |

|                                 |               |               |               |                    |               |               |               |
|---------------------------------|---------------|---------------|---------------|--------------------|---------------|---------------|---------------|
| H                               | 0.8985670000  | 0.6316480000  | -2.8043470000 | $E_0 + G_{corr}$   | =             | -1095.270924  |               |
| H                               | 2.4610900000  | 1.3533340000  | -2.3955080000 | Frequency: -522.21 |               |               |               |
| C                               | -2.0583360000 | 0.9858990000  | -2.2939440000 | Coordinates:       |               |               |               |
| C                               | 1.6492790000  | 0.7328950000  | -2.0132540000 | H                  | -2.4756280000 | 1.7013820000  | -2.8915090000 |
| H                               | -1.2622350000 | 1.5992110000  | -1.8682900000 | H                  | 1.2289870000  | 0.8718680000  | -2.8431550000 |
| H                               | 2.0404580000  | -0.2592100000 | -1.7984660000 | H                  | -1.1840030000 | 0.5485950000  | -2.5394530000 |
| H                               | 6.3739450000  | -1.0992420000 | -1.6861120000 | C                  | -1.8972960000 | 1.2397810000  | -2.0900830000 |
| H                               | -4.5272820000 | 1.7822810000  | -1.6822390000 | H                  | 2.7981660000  | 1.1206820000  | -2.0630390000 |
| H                               | 1.5528260000  | 3.3530280000  | -1.3995850000 | C                  | 1.8086990000  | 0.6756930000  | -1.9351610000 |
| C                               | -2.9421880000 | 0.4215060000  | -1.2104940000 | H                  | 1.9355830000  | -0.3990480000 | -1.8207580000 |
| H                               | 4.2047780000  | -2.1836650000 | -1.1077760000 | H                  | 6.2932770000  | -0.9594260000 | -1.6561610000 |
| C                               | -4.2195450000 | 0.9661790000  | -1.0356640000 | H                  | -1.3321700000 | 2.0276660000  | -1.5856750000 |
| C                               | 5.7172890000  | -0.6463300000 | -0.9507050000 | H                  | -4.3591650000 | 1.9968400000  | -1.4996680000 |
| C                               | 1.0303560000  | 1.3704720000  | -0.7958860000 | H                  | 1.6384110000  | 3.2773240000  | -1.3454860000 |
| H                               | -6.8092480000 | 1.6110980000  | -0.7896800000 | C                  | -2.8229000000 | 0.5548550000  | -1.1192970000 |
| C                               | 1.0549990000  | 2.7620140000  | -0.6364350000 | H                  | 4.1690550000  | -2.1464110000 | -1.1086290000 |
| C                               | 4.5112330000  | -1.2635120000 | -0.6249690000 | C                  | -4.0955440000 | 1.1078680000  | -0.9342810000 |
| H                               | 7.0165500000  | 1.0365240000  | -0.5964230000 | C                  | 5.6151100000  | -0.5507410000 | -0.9154670000 |
| I                               | -0.5640920000 | -1.5549300000 | -0.5394350000 | C                  | 1.1184360000  | 1.2966960000  | -0.7478040000 |
| C                               | -2.5565820000 | -0.6306440000 | -0.3687140000 | C                  | 4.4379980000  | -1.2240540000 | -0.6065340000 |
| C                               | 6.0806260000  | 0.5533370000  | -0.3381150000 | C                  | 1.1148580000  | 2.6851660000  | -0.5992820000 |
| O                               | 1.8155860000  | -2.1424030000 | -0.2972610000 | H                  | -6.5561530000 | 1.9799360000  | -0.5828580000 |
| C                               | -5.1044030000 | 0.4925390000  | -0.0701260000 | I                  | -0.5541020000 | -1.5469190000 | -0.5737310000 |
| H                               | 1.3668870000  | 5.3334750000  | 0.0903170000  | H                  | 6.8369960000  | 1.1773160000  | -0.5267910000 |
| H                               | -0.3967450000 | 5.3391450000  | 0.1037160000  | H                  | 0.3786420000  | 5.3039360000  | -0.3908040000 |
| C                               | -6.4594490000 | 1.1268710000  | 0.1245420000  | C                  | -2.4933870000 | -0.5888330000 | -0.3903930000 |
| C                               | 0.3929080000  | 0.6563990000  | 0.2137420000  | O                  | 1.7620720000  | -2.1722020000 | -0.3133890000 |
| C                               | 3.6578960000  | -0.6953160000 | 0.3232570000  | C                  | 5.9231300000  | 0.6496090000  | -0.2801130000 |
| H                               | -7.2052750000 | 0.3884570000  | 0.4279020000  | C                  | -5.0238130000 | 0.5562270000  | -0.0642470000 |
| C                               | 0.4750310000  | 3.3992080000  | 0.4610820000  | H                  | -7.1711310000 | 0.4309060000  | 0.0117220000  |
| C                               | 0.4892060000  | 4.9041310000  | 0.5785740000  | C                  | -6.3822170000 | 1.1761830000  | 0.1328630000  |
| C                               | -3.4328900000 | -1.1636960000 | 0.5933630000  | C                  | 0.4396890000  | 0.5727110000  | 0.2273520000  |
| C                               | 5.2301620000  | 1.1307340000  | 0.6048590000  | C                  | 3.5625030000  | -0.7084450000 | 0.3473890000  |
| C                               | 2.3350000000  | -1.3660620000 | 0.6703220000  | C                  | 0.4631490000  | 3.3229350000  | 0.4531370000  |
| C                               | -4.6964740000 | -0.5801520000 | 0.7225090000  | C                  | -3.4158860000 | -1.1914920000 | 0.4836330000  |
| H                               | 1.6136060000  | -0.4612460000 | 0.7837540000  | C                  | 0.4988240000  | 4.8241890000  | 0.5821910000  |
| H                               | -2.9106510000 | -3.2454980000 | 0.8793820000  | H                  | -2.8816480000 | -3.2849690000 | 0.6113090000  |
| H                               | -6.4187130000 | 1.8916340000  | 0.9076660000  | C                  | -4.6671750000 | -0.6001920000 | 0.6289960000  |
| C                               | 4.0278910000  | 0.5077780000  | 0.9327200000  | C                  | 2.2649610000  | -1.4287930000 | 0.6647190000  |
| H                               | 5.4997490000  | 2.0691330000  | 1.0776270000  | C                  | 5.0515950000  | 1.1705450000  | 0.6721590000  |
| C                               | -0.1817760000 | 1.2138310000  | 1.3484750000  | H                  | 1.5169390000  | -0.5131520000 | 0.7971860000  |
| C                               | -0.1270170000 | 2.6107650000  | 1.4423060000  | C                  | 3.8787290000  | 0.4915140000  | 0.9845810000  |
| H                               | -5.3810070000 | -0.9832340000 | 1.4626040000  | H                  | 1.4553280000  | 5.1541700000  | 0.9965310000  |
| C                               | -3.0889160000 | -2.3445530000 | 1.4725630000  | H                  | -6.4742180000 | 1.5919330000  | 1.1394770000  |
| H                               | 0.4901800000  | 5.2224690000  | 1.6235150000  | H                  | 5.2815370000  | 2.1083740000  | 1.1645830000  |
| H                               | 3.3585440000  | 0.9693810000  | 1.6522040000  | H                  | -0.2929480000 | 5.1819340000  | 1.2411550000  |
| H                               | 3.0601050000  | -2.8689740000 | 2.0473430000  | C                  | -3.1107260000 | -2.4437090000 | 1.2689610000  |
| C                               | 2.3584530000  | -2.0299480000 | 2.0619800000  | H                  | -5.3859730000 | -1.0574880000 | 1.3027040000  |
| H                               | -2.1869540000 | -2.1673930000 | 2.0624010000  | C                  | -0.2046110000 | 1.1394660000  | 1.3211760000  |
| H                               | -3.9066450000 | -2.5563170000 | 2.1627470000  | C                  | -0.1852870000 | 2.5341280000  | 1.4005960000  |
| H                               | -1.8523520000 | 0.2031680000  | 2.2434890000  | H                  | 3.1856510000  | 0.9090390000  | 1.7108280000  |
| H                               | 1.3642040000  | -2.4183860000 | 2.2964400000  | H                  | -3.9676050000 | -2.7186180000 | 1.8835090000  |
| H                               | -0.5512090000 | 3.0820830000  | 2.3241050000  | H                  | -2.2488060000 | -2.3039000000 | 1.9266430000  |
| C                               | -0.7982700000 | 0.3992450000  | 2.4533790000  | H                  | 3.0000190000  | -2.9241790000 | 2.0278730000  |
| H                               | -0.2911420000 | -0.5602990000 | 2.5648120000  | C                  | 2.2757290000  | -2.1051230000 | 2.0420380000  |
| H                               | 2.6663890000  | -1.3311260000 | 2.8447350000  | H                  | -1.9059250000 | 0.1292130000  | 2.1659710000  |
| H                               | -0.7391630000 | 0.9320240000  | 3.4039000000  | H                  | -0.6749510000 | 3.0066670000  | 2.2473800000  |
|                                 |               |               |               | H                  | 1.2879770000  | -2.5251280000 | 2.2479490000  |
|                                 |               |               |               | C                  | -0.8559730000 | 0.3223130000  | 2.4027700000  |
|                                 |               |               |               | H                  | -0.3491020000 | -0.6375970000 | 2.5225490000  |
|                                 |               |               |               | H                  | 2.5494570000  | -1.4089370000 | 2.8383360000  |
|                                 |               |               |               | H                  | -0.8173720000 | 0.8544050000  | 3.3537380000  |
| <b>TS9-1e (M062-X, Toluene)</b> |               |               |               |                    |               |               |               |
| $E_0 + E_{ZPE}$                 | =             | -1095.210218  |               |                    |               |               |               |
| $E_0 + E_{tot}$                 | =             | -1095.180476  |               |                    |               |               |               |
| $E_0 + H_{corr}$                | =             | -1095.179532  |               |                    |               |               |               |

**TS10-1d (B3LYP-D3, Toluene)**

$E_0 + E_{ZPE} = -859.995867$   
 $E_0 + E_{tot} = -859.975215$   
 $E_0 + H_{corr} = -859.974270$   
 $E_0 + G_{corr} = -860.050240$

Frequency: -287.65

Coordinates:

|   |               |               |               |
|---|---------------|---------------|---------------|
| H | -3.9437820000 | 1.0396720000  | -2.2198970000 |
| H | 3.4152590000  | -0.3043520000 | -1.9583020000 |
| H | -2.9080250000 | -1.2515730000 | -1.7731070000 |
| H | -3.4440850000 | 2.6744130000  | -1.7486230000 |
| H | 1.2198610000  | 2.4665300000  | -1.7084840000 |
| C | -3.7596400000 | 1.7001320000  | -1.3681220000 |
| O | -1.4507220000 | 1.0333550000  | -1.1927110000 |
| H | 5.7039810000  | -0.7608470000 | -1.1357220000 |
| C | 3.5629870000  | -0.7254800000 | -0.9714440000 |
| H | -3.5314620000 | -3.4666590000 | -0.8518160000 |
| I | 0.4597600000  | -0.5636420000 | -0.8445400000 |
| H | -4.6949970000 | 1.8193160000  | -0.8111180000 |
| C | -3.1331810000 | -1.3587360000 | -0.7173110000 |
| C | 0.9531980000  | 2.5724290000  | -0.6664490000 |
| C | 4.8514520000  | -0.9831080000 | -0.5041750000 |
| H | 1.7199670000  | 4.5612190000  | -0.4862910000 |
| C | -2.6456040000 | 1.1180370000  | -0.4809340000 |
| C | -3.4763310000 | -2.6031850000 | -0.1972110000 |
| C | 2.4746820000  | -1.0176170000 | -0.1531100000 |
| C | 0.2868840000  | 1.5599440000  | 0.0094400000  |
| C | 1.2237400000  | 3.7480100000  | 0.0320370000  |
| C | -3.0572480000 | -0.2299920000 | 0.1078510000  |
| H | -2.5116910000 | 1.8105150000  | 0.3731590000  |
| C | 5.0412840000  | -1.5201760000 | 0.7679830000  |
| C | 2.6505820000  | -1.5487810000 | 1.1222780000  |
| H | 6.0444560000  | -1.7174150000 | 1.1276770000  |
| C | -3.7489140000 | -2.7433090000 | 1.1655020000  |
| C | -0.0698870000 | 1.6452190000  | 1.3477620000  |
| C | 0.8620690000  | 3.8850280000  | 1.3730800000  |
| C | -3.3342140000 | -0.3820610000 | 1.4678640000  |
| H | -4.0131990000 | -3.7129330000 | 1.5728090000  |
| C | 3.9433890000  | -1.8020390000 | 1.5792720000  |
| H | 1.7969290000  | -1.7636140000 | 1.7532650000  |
| H | -0.5710630000 | 0.8277830000  | 1.8478660000  |
| H | 1.0841350000  | 4.8014330000  | 1.9063230000  |
| C | -3.6775180000 | -1.6279480000 | 1.9967350000  |
| C | 0.2195190000  | 2.8338130000  | 2.0222510000  |
| H | -3.2751100000 | 0.4832770000  | 2.1212420000  |
| H | 4.0888500000  | -2.2173820000 | 2.5699090000  |
| H | -3.8861290000 | -1.7263910000 | 3.0568660000  |
| H | -0.0588910000 | 2.9221320000  | 3.0667790000  |

**TS10-1d (M062-X, Toluene)**

$E_0 + E_{ZPE} = -859.527174$   
 $E_0 + E_{tot} = -859.506853$   
 $E_0 + H_{corr} = -859.505909$   
 $E_0 + G_{corr} = -859.580641$

Frequency: -346.17

Coordinates:

|   |               |               |               |
|---|---------------|---------------|---------------|
| H | 0.8134660000  | 1.8217520000  | -2.2661450000 |
| H | -4.8855400000 | -2.2994870000 | -1.8694560000 |
| H | 1.5656670000  | 4.1380510000  | -1.8363540000 |

|   |               |               |               |
|---|---------------|---------------|---------------|
| H | -2.9903210000 | -0.6828440000 | -1.7673860000 |
| C | 0.9070920000  | 2.1952840000  | -1.2556510000 |
| C | 1.3167380000  | 3.4954580000  | -0.9996810000 |
| C | -4.7009880000 | -1.7336940000 | -0.9630190000 |
| C | -3.6417500000 | -0.8304490000 | -0.9139690000 |
| H | -3.2810510000 | 2.4781260000  | -0.7763380000 |
| O | -1.3214550000 | 0.6905270000  | -0.7029970000 |
| H | 3.2585990000  | 0.8074510000  | -0.5226020000 |
| I | 0.5632490000  | -0.8372290000 | -0.4508950000 |
| C | 0.5544600000  | 1.3959700000  | -0.1715320000 |
| C | 3.5651610000  | -0.1657130000 | -0.1557480000 |
| C | 2.6407090000  | -1.1874670000 | 0.0160190000  |
| H | 5.6286370000  | 0.3845810000  | 0.0299120000  |
| H | -6.3463860000 | -2.6154800000 | 0.1059140000  |
| C | -5.5229640000 | -1.9119640000 | 0.1440980000  |
| C | 4.8998320000  | -0.4065470000 | 0.1591460000  |
| C | -2.7883040000 | 2.3477570000  | 0.1900650000  |
| C | -3.3934040000 | -0.0944990000 | 0.2425340000  |
| H | -1.9489500000 | 3.0455720000  | 0.2534850000  |
| C | -2.2537860000 | 0.9140240000  | 0.2916530000  |
| C | 1.4029930000  | 3.9785340000  | 0.3071450000  |
| H | 1.7276940000  | 4.9941900000  | 0.4929500000  |
| C | 3.0183430000  | -2.4336020000 | 0.4986940000  |
| C | 5.2964200000  | -1.6525710000 | 0.6323820000  |
| H | 2.2858040000  | -3.2199130000 | 0.6412270000  |
| C | 4.3574020000  | -2.6644260000 | 0.8006160000  |
| H | 6.3368570000  | -1.8349600000 | 0.8722890000  |
| H | -3.5032190000 | 2.5726440000  | 0.9862460000  |
| C | 0.6750460000  | 1.8229470000  | 1.1427670000  |
| H | 4.6615470000  | -3.6352490000 | 1.1729400000  |
| H | -1.7909770000 | 0.8043480000  | 1.2951580000  |
| C | -5.2795280000 | -1.1815270000 | 1.3048930000  |
| C | -4.2215740000 | -0.2816110000 | 1.3505370000  |
| C | 1.0850230000  | 3.1391700000  | 1.3649270000  |
| H | 0.4575780000  | 1.1654960000  | 1.9734810000  |
| H | -5.9122330000 | -1.3181720000 | 2.1745750000  |
| H | -4.0285080000 | 0.2810020000  | 2.2596970000  |
| H | 1.1692220000  | 3.4913820000  | 2.3865360000  |

**TS10-1e (B3LYP-D3, Toluene)**

$E_0 + E_{ZPE} = -1095.817006$   
 $E_0 + E_{tot} = -1095.786613$   
 $E_0 + H_{corr} = -1095.785668$   
 $E_0 + G_{corr} = -1095.880884$

Frequency: -236.80

Coordinates:

|   |               |               |               |
|---|---------------|---------------|---------------|
| H | -2.7140480000 | 0.5803090000  | -3.2517220000 |
| H | -1.3919720000 | -0.4980270000 | -2.7939170000 |
| H | 2.1034470000  | 1.5463080000  | -2.6236750000 |
| H | 0.7519570000  | 0.4121810000  | -2.6179950000 |
| C | -2.1109950000 | 0.2316290000  | -2.4127270000 |
| H | -4.7861730000 | 0.1239570000  | -2.3829860000 |
| H | 6.4494220000  | -0.8821180000 | -2.0255610000 |
| H | -1.5469590000 | 1.0830680000  | -2.0252480000 |
| C | 1.4781540000  | 0.9248850000  | -1.9810620000 |
| H | 1.1858310000  | 3.6005880000  | -1.9697080000 |
| H | 5.8242710000  | -3.2828350000 | -1.9069440000 |
| H | -7.0095700000 | -0.7209600000 | -1.7684570000 |
| H | 2.1101520000  | 0.1630280000  | -1.5260550000 |
| C | -4.3727580000 | -0.3394250000 | -1.4927380000 |
| C | 5.6275260000  | -1.1990560000 | -1.3920090000 |
| C | -2.9826810000 | -0.3739820000 | -1.3430140000 |

|   |               |               |               |   |               |               |               |
|---|---------------|---------------|---------------|---|---------------|---------------|---------------|
| C | 5.2765780000  | -2.5476580000 | -1.3275160000 | H | -6.8423210000 | 0.4836760000  | -1.5866660000 |
| C | 0.7234320000  | 3.1635610000  | -1.0896260000 | H | -2.0637490000 | -0.0142970000 | -1.5387740000 |
| H | 0.8149360000  | 5.8372870000  | -1.0261330000 | C | 4.4321190000  | 0.1594410000  | -1.4499680000 |
| C | 0.7901350000  | 1.7698850000  | -0.9409380000 | C | 3.0464710000  | 0.2649880000  | -1.3342780000 |
| H | -0.9365340000 | 5.7659400000  | -0.8243920000 | C | -5.7016450000 | 2.2622320000  | -1.1845110000 |
| C | -6.7326590000 | -0.7993750000 | -0.7150760000 | C | -5.9592320000 | 0.8955130000  | -1.1111170000 |
| H | 5.1885320000  | 0.7938310000  | -0.7122900000 | H | -0.7294840000 | -5.6601830000 | -1.0934010000 |
| C | 4.9182420000  | -0.2565020000 | -0.6499550000 | C | -0.7607330000 | -3.0290540000 | -1.0421180000 |
| C | -5.2361930000 | -0.8814380000 | -0.5423420000 | C | -0.7829350000 | -1.6333070000 | -0.9392880000 |
| C | 4.2136220000  | -2.9413090000 | -0.5151130000 | C | 6.7874650000  | 0.5301300000  | -0.6370410000 |
| H | 3.9349520000  | -3.9885370000 | -0.4577440000 | H | -4.3562320000 | 3.8413260000  | -0.6284520000 |
| C | 0.0184360000  | 5.4834290000  | -0.3678550000 | C | -4.5623400000 | 2.7779230000  | -0.5755080000 |
| H | -7.2309220000 | -1.6755840000 | -0.2940280000 | C | 5.2968140000  | 0.6890400000  | -0.4968330000 |
| H | -7.1315080000 | 0.0824410000  | -0.2024460000 | C | -5.0806450000 | 0.0572900000  | -0.4343080000 |
| C | -2.4698150000 | -0.9783160000 | -0.1881780000 | H | -5.2787500000 | -1.0100720000 | -0.3869290000 |
| C | 0.0987930000  | 3.9902230000  | -0.1580890000 | H | 0.8510850000  | -5.7218400000 | -0.3069310000 |
| C | 3.8491600000  | -0.6396320000 | 0.1663270000  | C | -0.1697880000 | -5.3430700000 | -0.2127480000 |
| I | -0.3003510000 | -1.0217770000 | 0.1782720000  | C | 2.5408320000  | 0.9256860000  | -0.2110680000 |
| C | 0.1890670000  | 1.2612660000  | 0.2053220000  | H | 7.1131310000  | -0.4142780000 | -0.1924520000 |
| C | 3.5070280000  | -1.9931450000 | 0.2237860000  | H | 7.3190730000  | 1.3372810000  | -0.1317540000 |
| H | 3.0799980000  | 1.3325870000  | 0.4018090000  | C | -0.1807540000 | -3.8418730000 | -0.0756070000 |
| H | 0.0982140000  | 6.0225270000  | 0.5794670000  | I | 0.4121100000  | 1.0936480000  | 0.0860110000  |
| C | -4.6795970000 | -1.4811130000 | 0.5869030000  | C | -3.6854890000 | 1.9336670000  | 0.1011260000  |
| C | -3.2984230000 | -1.5423230000 | 0.7951750000  | C | -3.9347350000 | 0.5649160000  | 0.1804970000  |
| H | 2.6751700000  | -2.2864640000 | 0.8535240000  | C | -0.1862060000 | -1.0992010000 | 0.1959180000  |
| C | -0.4655300000 | 3.3963150000  | 0.9729580000  | H | -2.9366810000 | -1.3004730000 | 0.3549950000  |
| C | 3.0704030000  | 0.3891450000  | 0.9892040000  | H | -2.7904750000 | 2.3198740000  | 0.5763590000  |
| C | -0.4401460000 | 2.0146260000  | 1.1888920000  | C | 4.7483270000  | 1.3508790000  | 0.5971820000  |
| O | 1.7687040000  | 0.0071010000  | 1.2418410000  | H | -0.6176210000 | -5.8190510000 | 0.6626240000  |
| H | -5.3357770000 | -1.9186100000 | 1.3327660000  | C | 3.3703910000  | 1.4836080000  | 0.7694570000  |
| H | -0.9284560000 | 4.0211870000  | 1.7309930000  | C | -2.9774580000 | -0.3531920000 | 0.9375770000  |
| H | -2.1626230000 | -3.0907660000 | 1.7972460000  | C | 0.3860620000  | -3.2283270000 | 1.0414670000  |
| C | -2.7754380000 | -2.2184160000 | 2.0408090000  | O | -1.7206530000 | 0.1763380000  | 1.0703390000  |
| H | 4.8385550000  | 1.0290180000  | 2.1337250000  | C | 0.4104630000  | -1.8445870000 | 1.2067690000  |
| H | -1.9124790000 | 0.8288470000  | 2.2245910000  | H | 5.4088330000  | 1.7821510000  | 1.3428480000  |
| C | 3.8149390000  | 0.6813920000  | 2.3093060000  | H | 2.2997020000  | 3.1274690000  | 1.6751830000  |
| C | -1.0122050000 | 1.4121340000  | 2.4424560000  | H | 0.8200270000  | -3.8425980000 | 1.8256340000  |
| H | -2.1539670000 | -1.5454260000 | 2.6367600000  | C | 2.8494440000  | 2.2307650000  | 1.9713460000  |
| H | -3.6016680000 | -2.5571850000 | 2.6668370000  | H | 1.9396690000  | -0.7094170000 | 2.2105360000  |
| H | 3.2686520000  | 1.4477450000  | 2.8651360000  | H | -4.5614870000 | -1.1576700000 | 2.2297590000  |
| H | -0.2757840000 | 0.7497750000  | 2.9013060000  | C | -3.5698960000 | -0.7032490000 | 2.3122880000  |
| H | 3.8529640000  | -0.2280440000 | 2.9157260000  | C | 0.9943380000  | -1.2131400000 | 2.4383050000  |
| H | -1.2841070000 | 2.1904670000  | 3.1568350000  | H | 2.1716040000  | 1.6156160000  | 2.5677090000  |

**TS10-1e (M062-X, Toluene)**

|                  |   |              |
|------------------|---|--------------|
| $E_0 + E_{ZPE}$  | = | -1095.208872 |
| $E_0 + E_{tot}$  | = | -1095.178728 |
| $E_0 + H_{corr}$ | = | -1095.177784 |
| $E_0 + G_{corr}$ | = | -1095.272367 |

Frequency: -320.77

Coordinates:

|   |               |               |               |
|---|---------------|---------------|---------------|
| H | 2.7754130000  | -0.7136820000 | -3.2208890000 |
| H | 1.5010270000  | 0.4434960000  | -2.8207050000 |
| H | -0.7063880000 | -0.2997340000 | -2.6333620000 |
| H | -2.0794890000 | -1.4114110000 | -2.6283220000 |
| C | 2.1678180000  | -0.3176420000 | -2.4080600000 |
| H | 4.8434030000  | -0.3483310000 | -2.3167600000 |
| H | 1.5516630000  | -1.1307210000 | -2.0156950000 |
| C | -1.4456830000 | -0.7911810000 | -1.9939560000 |
| H | -1.2266720000 | -3.4800680000 | -1.9134680000 |
| H | -6.3823260000 | 2.9176740000  | -1.7151790000 |
| H | 7.0847860000  | 0.5225190000  | -1.6866360000 |

**TS11-1d (B3LYP-D3, Toluene)**

|                  |   |              |
|------------------|---|--------------|
| $E_0 + E_{ZPE}$  | = | -1245.535112 |
| $E_0 + E_{tot}$  | = | -1245.504819 |
| $E_0 + H_{corr}$ | = | -1245.503875 |
| $E_0 + G_{corr}$ | = | -1245.600596 |

Frequency: -1344.44

Coordinates:

|   |               |               |               |
|---|---------------|---------------|---------------|
| H | -2.1753570000 | -1.7297410000 | -3.3612830000 |
| H | -3.7715390000 | -1.5239350000 | -2.6432500000 |

|                                  |               |               |               |                         |               |               |               |
|----------------------------------|---------------|---------------|---------------|-------------------------|---------------|---------------|---------------|
| C                                | -2.7845310000 | -1.9710210000 | -2.4852390000 | $\epsilon_0 + G_{corr}$ | =             | -1244.940316  |               |
| H                                | -2.9102190000 | -3.0664250000 | -2.4552920000 | Frequency: -1255.21     |               |               |               |
| H                                | -4.2070970000 | 1.6486570000  | -2.3305980000 | Coordinates:            |               |               |               |
| H                                | -2.1289180000 | 2.9910210000  | -2.2306490000 | H                       | 4.6163820000  | -1.3202900000 | -3.5284580000 |
| O                                | -1.6260900000 | 1.0394110000  | -2.0002670000 | H                       | 2.1768190000  | -1.8047220000 | -3.3933970000 |
| H                                | -1.9923010000 | -0.0003970000 | -1.5893430000 | H                       | 0.1894300000  | 3.8731640000  | -3.1681500000 |
| C                                | -2.2808980000 | 2.1795630000  | -1.5011620000 | H                       | 1.2109890000  | 1.6102800000  | -2.9855960000 |
| H                                | 1.1383090000  | -3.3661770000 | -1.4032680000 | H                       | -3.8832070000 | -2.6973640000 | -2.6681090000 |
| C                                | -3.7986080000 | 1.9676800000  | -1.3672050000 | C                       | 4.1176390000  | -1.3841460000 | -2.5684480000 |
| H                                | 4.1315630000  | -0.3912490000 | -1.2472990000 | C                       | 2.7499180000  | -1.6455750000 | -2.4840990000 |
| C                                | -2.0992450000 | -1.4405430000 | -1.2309160000 | C                       | 0.6005530000  | 3.5334510000  | -2.2239730000 |
| O                                | -0.7883020000 | -1.8949320000 | -1.1378260000 | C                       | 1.1741200000  | 2.2653450000  | -2.1217310000 |
| H                                | -4.2978220000 | 2.8929060000  | -1.0599520000 | C                       | -3.2578300000 | -2.8509670000 | -1.7963540000 |
| H                                | -0.9847540000 | 4.5349120000  | -0.9683670000 | H                       | -3.5421160000 | -4.9801380000 | -1.7605420000 |
| I                                | 0.8060690000  | -0.2848510000 | -0.8881910000 | H                       | -2.7940400000 | -0.7579960000 | -1.5877650000 |
| H                                | 6.0592650000  | 1.0901600000  | -0.7760340000 | H                       | 5.9015510000  | -1.0444800000 | -1.4127590000 |
| H                                | -4.8189730000 | -1.1572830000 | -0.7693030000 | C                       | 4.8312040000  | -1.2256730000 | -1.3784630000 |
| C                                | 3.9731350000  | 0.5547770000  | -0.7381250000 | C                       | -3.0638070000 | -4.1304330000 | -1.2874340000 |
| H                                | -4.0215200000 | 1.1943950000  | -0.6289270000 | C                       | 2.1070220000  | -1.7199440000 | -1.2563570000 |
| C                                | 1.7084430000  | -3.2355490000 | -0.4948640000 | H                       | 1.0479570000  | -1.9454570000 | -1.2039730000 |
| C                                | 5.0612070000  | 1.3851000000  | -0.4660010000 | C                       | -2.6453790000 | -1.7554690000 | -1.1926710000 |
| C                                | 2.6894420000  | 0.9268950000  | -0.3429420000 | H                       | -3.1681680000 | 3.9253000000  | -1.1807740000 |
| H                                | 2.2267630000  | -5.3093440000 | -0.2958710000 | H                       | 0.1097740000  | 5.3429870000  | -1.1723070000 |
| C                                | -1.6720270000 | 2.6577290000  | -0.1833200000 | C                       | 0.5576140000  | 4.3572910000  | -1.1047850000 |
| C                                | -1.0381320000 | 3.8990720000  | -0.0893200000 | C                       | 1.7023220000  | 1.8316090000  | -0.9126490000 |
| C                                | -2.8320730000 | -1.4955510000 | 0.0310240000  | H                       | 2.1382350000  | 0.8395150000  | -0.8393110000 |
| C                                | 1.8213810000  | -1.9751950000 | 0.0801860000  | H                       | -1.3400540000 | 2.3454430000  | -0.6623150000 |
| C                                | -4.2317610000 | -1.2776270000 | 0.1341860000  | C                       | -3.3861260000 | 3.0110190000  | -0.6390250000 |
| C                                | 2.3092370000  | -4.3213710000 | 0.1441160000  | H                       | -5.4905070000 | 3.4167250000  | -0.4628700000 |
| C                                | 4.8670020000  | 2.5938620000  | 0.2052740000  | C                       | -2.3558420000 | 2.1175810000  | -0.3486620000 |
| C                                | 2.4952290000  | 2.1356080000  | 0.3215770000  | C                       | -4.6865130000 | 2.7250400000  | -0.2383290000 |
| H                                | 5.7127180000  | 3.2392190000  | 0.4185590000  | C                       | -2.2461470000 | -4.3187850000 | -0.1781620000 |
| C                                | 3.5827480000  | 2.9680890000  | 0.5982360000  | C                       | 4.1978270000  | -1.3012460000 | -0.1469620000 |
| H                                | 1.4985550000  | 2.4361990000  | 0.6269750000  | C                       | -1.8453520000 | -1.9629620000 | -0.0793130000 |
| H                                | -2.1848670000 | 0.8721010000  | 0.9043740000  | C                       | 2.8011680000  | -1.5174290000 | -0.0360350000 |
| C                                | -1.7165300000 | 1.8464630000  | 0.9570180000  | C                       | 1.0860780000  | 3.9138970000  | 0.1078110000  |
| C                                | -0.4649580000 | 4.3279510000  | 1.1097280000  | H                       | -2.0809880000 | -5.3153650000 | 0.2143740000  |
| H                                | 3.4232840000  | 3.9044210000  | 1.1243310000  | C                       | 1.6662950000  | 2.6521760000  | 0.2191190000  |
| H                                | 0.0274900000  | 5.2939530000  | 1.1587070000  | C                       | -2.6221360000 | 0.9390890000  | 0.3399550000  |
| H                                | -1.0811170000 | -1.9040560000 | 1.2123540000  | C                       | -1.6237100000 | -3.2339650000 | 0.4340300000  |
| C                                | -2.1397110000 | -1.6827630000 | 1.2579810000  | C                       | -4.9549080000 | 1.5471340000  | 0.4564860000  |
| C                                | 2.4943740000  | -1.7793310000 | 1.2786130000  | H                       | 3.9486840000  | 1.1398220000  | 0.6555660000  |
| C                                | 3.0006430000  | -4.1426500000 | 1.3412160000  | C                       | -3.9235220000 | 0.6583310000  | 0.7462020000  |
| C                                | -4.8714700000 | -1.1922210000 | 1.3645520000  | H                       | 4.7879310000  | -1.1693810000 | 0.7537610000  |
| H                                | -5.9430280000 | -1.0120330000 | 1.3936680000  | H                       | -5.9677820000 | 1.3235430000  | 0.7738100000  |
| H                                | 2.5643410000  | -0.7900290000 | 1.7129970000  | I                       | -0.8401110000 | -0.3068930000 | 0.8631510000  |
| H                                | 3.4627110000  | -4.9912780000 | 1.8337610000  | H                       | 1.0439290000  | 4.5559280000  | 0.9827370000  |
| C                                | 3.0897910000  | -2.8726640000 | 1.9089510000  | H                       | 4.2736400000  | 2.8255460000  | 1.1093970000  |
| C                                | -1.1411220000 | 2.2644230000  | 2.1525070000  | O                       | 0.7621420000  | -1.9089420000 | 1.1139960000  |
| C                                | -0.5131270000 | 3.5095100000  | 2.2366110000  | C                       | 2.0692600000  | -1.4471060000 | 1.2228900000  |
| C                                | -2.7876310000 | -1.5965740000 | 2.4842290000  | H                       | -0.9462150000 | -3.3610470000 | 1.2668750000  |
| C                                | -4.1597410000 | -1.3380640000 | 2.5606180000  | H                       | -4.1398960000 | -0.2615610000 | 1.2819980000  |
| H                                | 3.6197890000  | -2.7266530000 | 2.8441080000  | C                       | 3.7519780000  | 1.9106950000  | 1.4054480000  |
| H                                | -1.1813360000 | 1.6119150000  | 3.0184510000  | C                       | 2.2435310000  | 2.1527480000  | 1.5407760000  |
| H                                | -0.0612880000 | 3.8336160000  | 3.1682240000  | H                       | 1.9498770000  | -0.0107150000 | 1.5922940000  |
| H                                | -2.2154450000 | -1.7418100000 | 3.3973100000  | O                       | 1.5733140000  | 1.0232870000  | 2.0084800000  |
| H                                | -4.6621360000 | -1.2654020000 | 3.5192970000  | H                       | 2.1018040000  | 2.9639930000  | 2.2719900000  |
|                                  |               |               |               | H                       | 4.1503130000  | 1.5673360000  | 2.3640930000  |
|                                  |               |               |               | H                       | 2.8513270000  | -3.0987020000 | 2.4231460000  |
|                                  |               |               |               | C                       | 2.7526480000  | -2.0023180000 | 2.4626100000  |
|                                  |               |               |               | H                       | 3.7498400000  | -1.5769990000 | 2.6114030000  |
|                                  |               |               |               | H                       | 2.1592970000  | -1.7511100000 | 3.3468150000  |
| <b>TS11-1d (M062-X, Toluene)</b> |               |               |               |                         |               |               |               |
| $\epsilon_0 + \epsilon_{ZPE}$    | =             | -1244.879549  |               |                         |               |               |               |
| $\epsilon_0 + E_{tot}$           | =             | -1244.850787  |               |                         |               |               |               |
| $\epsilon_0 + H_{corr}$          | =             | -1244.849842  |               |                         |               |               |               |

**TS11-1e (B3LYP-D3, Toluene)**

$E_0 + E_{ZPE} = -1481.353837$   
 $E_0 + E_{tot} = -1481.314088$   
 $E_0 + H_{corr} = -1481.313144$   
 $E_0 + G_{corr} = -1481.427908$

Frequency: -1303.60

Coordinates:

|   |               |               |               |
|---|---------------|---------------|---------------|
| H | -2.2714420000 | -1.7886310000 | -3.5466630000 |
| H | -4.6476530000 | 0.6669450000  | -2.8184420000 |
| H | -2.7112080000 | -3.3253310000 | -2.7752230000 |
| H | -3.8316340000 | -1.9470890000 | -2.7442150000 |
| C | -2.7751270000 | -2.2279060000 | -2.6811050000 |
| H | 2.4848130000  | -2.1047870000 | -2.6765640000 |
| H | 3.4792000000  | -0.0585280000 | -2.4373230000 |
| H | 2.4893100000  | -3.8498600000 | -2.3883000000 |
| H | 0.9644830000  | -2.9215130000 | -2.2996340000 |
| H | -3.1818330000 | 2.5949640000  | -2.2310170000 |
| C | 2.0357130000  | -2.9053120000 | -2.0818000000 |
| O | -2.1548490000 | 0.8730650000  | -1.9033850000 |
| H | 5.1086100000  | 0.3075730000  | -1.8592200000 |
| C | -4.5903220000 | 1.0401670000  | -1.7922100000 |
| H | -5.4123580000 | 1.7431480000  | -1.6208370000 |
| H | -2.2951220000 | -0.2547600000 | -1.5992410000 |
| C | -3.2265010000 | 1.7180140000  | -1.5651620000 |
| C | 4.0759240000  | 0.1418090000  | -1.5442210000 |
| O | -0.7366780000 | -1.9239950000 | -1.4329430000 |
| C | -2.1117820000 | -1.7187690000 | -1.4069080000 |
| H | -4.7116870000 | 0.1969330000  | -1.1088710000 |
| I | 0.5506100000  | -0.0767370000 | -1.0762510000 |
| H | 4.0487080000  | -0.7604350000 | -0.9299970000 |
| H | -4.7970960000 | -2.1338720000 | -0.8103970000 |
| C | 3.5415730000  | 1.3395240000  | -0.7951120000 |
| H | -3.2321680000 | 4.3178020000  | -0.6859380000 |
| H | 5.4944720000  | 2.2274300000  | -0.6637290000 |
| C | 2.2383690000  | -2.6723370000 | -0.6074370000 |
| C | 2.1836800000  | 1.4895740000  | -0.4775130000 |
| H | -0.3359770000 | 2.8735710000  | -0.4675380000 |
| C | 4.4410520000  | 2.3466820000  | -0.4213030000 |
| H | 3.3736000000  | -4.4699140000 | -0.3610710000 |
| C | -3.1292830000 | 2.2446530000  | -0.1328720000 |
| C | -2.7385810000 | -2.0266860000 | -0.1290200000 |
| H | 5.8869250000  | 4.5789430000  | 0.0116390000  |
| C | -4.1437150000 | -2.1448030000 | 0.0543280000  |
| C | 1.7136330000  | -1.5644520000 | 0.0711150000  |
| C | -3.1514800000 | 3.6143890000  | 0.1382250000  |
| C | 2.9562510000  | -3.6048530000 | 0.1464000000  |
| C | 1.7304860000  | 2.6618510000  | 0.1510100000  |
| C | 4.0247780000  | 3.4994700000  | 0.2421300000  |
| C | 0.2689570000  | 2.9102210000  | 0.4405550000  |
| C | 2.6634480000  | 3.6440660000  | 0.5056230000  |
| C | 5.0184450000  | 4.5517210000  | 0.6750880000  |
| H | 4.5674160000  | 5.5474460000  | 0.6846730000  |
| H | -2.9856250000 | 0.2916990000  | 0.7583960000  |
| H | 0.1193700000  | 3.8872400000  | 0.9027870000  |
| H | -0.8739450000 | -2.1181510000 | 0.9407890000  |
| C | -3.0124010000 | 1.3566350000  | 0.9434970000  |
| H | 2.3117840000  | 4.5477850000  | 0.9972700000  |
| C | -1.9496020000 | -2.1242080000 | 1.0504270000  |
| H | -0.1549420000 | 2.1579580000  | 1.1089140000  |
| C | -4.7099490000 | -2.2566650000 | 1.3179270000  |
| H | -5.7908630000 | -2.3261720000 | 1.4094210000  |

|   |               |               |              |
|---|---------------|---------------|--------------|
| C | -3.0534720000 | 4.0931880000  | 1.4461810000 |
| C | 1.8350990000  | -1.3989110000 | 1.4537010000 |
| C | 3.1381720000  | -3.4680700000 | 1.5233080000 |
| H | -3.0631520000 | 5.1626010000  | 1.6325170000 |
| H | 5.3869840000  | 4.3506370000  | 1.6875350000 |
| H | 1.6669780000  | 0.6922550000  | 1.9624430000 |
| H | 3.6741210000  | -5.5066800000 | 2.0000570000 |
| H | 0.1396050000  | -0.1840570000 | 2.0069820000 |
| H | 5.0117350000  | -4.3640070000 | 2.1147950000 |
| C | 2.5637000000  | -2.3698180000 | 2.1555970000 |
| C | 1.2076100000  | -0.2629240000 | 2.2228230000 |
| C | -2.9138000000 | 1.8275600000  | 2.2489840000 |
| C | 3.9386480000  | -4.4881110000 | 2.2971450000 |
| C | -2.5247240000 | -2.2390700000 | 2.3094200000 |
| C | -3.9137290000 | -2.2890320000 | 2.4687310000 |
| C | -2.9332160000 | 3.1998790000  | 2.5080950000 |
| H | -2.8217570000 | 1.1160720000  | 3.0628330000 |
| H | -1.8785650000 | -2.2993840000 | 3.1819540000 |
| H | 2.6665310000  | -2.2605200000 | 3.2311690000 |
| H | 1.3254490000  | -0.4198190000 | 3.2963990000 |
| H | 3.7720480000  | -4.3946380000 | 3.3725200000 |
| H | -4.3614910000 | -2.3701440000 | 3.4533140000 |
| H | -2.8508630000 | 3.5669600000  | 3.5258760000 |

**TS711-1e (M062-X, Toluene)**

$E_0 + E_{ZPE} = -1480.558598$   
 $E_0 + E_{tot} = -1480.519480$   
 $E_0 + H_{corr} = -1480.518536$   
 $E_0 + G_{corr} = -1480.630285$

Frequency: -1204.05

Coordinates:

|   |               |               |               |
|---|---------------|---------------|---------------|
| H | -2.3748180000 | -1.6710800000 | -3.6078130000 |
| H | -2.8844410000 | -3.1828390000 | -2.8345370000 |
| H | -3.9162070000 | -1.7388580000 | -2.7565860000 |
| C | -2.8781870000 | -2.0858540000 | -2.7305920000 |
| H | -4.6219010000 | 0.8414590000  | -2.7181160000 |
| H | 2.3914840000  | -2.2465120000 | -2.6505450000 |
| H | 2.3625740000  | -3.9740210000 | -2.2719490000 |
| H | 0.8511220000  | -3.0134350000 | -2.2489170000 |
| H | -3.1344710000 | 2.7281550000  | -2.0821790000 |
| H | 3.5065220000  | -0.4847400000 | -2.0775050000 |
| C | 1.9212520000  | -3.0085960000 | -2.0228280000 |
| O | -2.1150910000 | 0.9876430000  | -1.8336570000 |
| C | -4.5324510000 | 1.1558820000  | -1.6749860000 |
| H | 5.1279820000  | 0.0663760000  | -1.6435210000 |
| H | -2.2853540000 | -0.1498100000 | -1.5859060000 |
| O | -0.7824850000 | -1.8771190000 | -1.5627980000 |
| C | -2.1478970000 | -1.6275010000 | -1.4788410000 |
| C | -3.1681950000 | 1.8225580000  | -1.4555390000 |
| H | -5.3499670000 | 1.8418170000  | -1.4347470000 |
| C | 4.1215690000  | -0.1077310000 | -1.2592500000 |
| I | 0.5802920000  | -0.0965460000 | -1.1515840000 |
| H | -4.6208750000 | 0.2733390000  | -1.0350100000 |
| H | -0.3091400000 | 2.7534380000  | -0.8285530000 |
| H | -4.8132660000 | -2.0494850000 | -0.8131070000 |
| C | 3.5512010000  | 1.1684750000  | -0.6912780000 |
| C | 2.1120870000  | -2.7104810000 | -0.5612170000 |
| C | 2.1791170000  | 1.3918520000  | -0.5386910000 |
| H | 4.1768870000  | -0.8933300000 | -0.5008060000 |
| H | -3.0822190000 | 4.3812300000  | -0.4583020000 |
| H | 5.5147580000  | 1.9949420000  | -0.4319880000 |
| C | 4.4488630000  | 2.1725540000  | -0.3122330000 |



|   |               |               |               |   |               |               |              |
|---|---------------|---------------|---------------|---|---------------|---------------|--------------|
| H | 3.1881600000  | -4.5232450000 | -0.2075970000 | H | -5.7353760000 | -2.2163310000 | 1.4380960000 |
| C | -2.7347670000 | -1.9651410000 | -0.1963010000 | C | 2.9596760000  | -3.4159380000 | 1.6150750000 |
| C | 1.7179270000  | 2.6263600000  | -0.0525120000 | C | -2.8338180000 | 4.0438600000  | 1.6515950000 |
| C | -3.0380350000 | 2.2849820000  | -0.0067020000 | H | 5.1184010000  | 4.4540940000  | 1.7148170000 |
| C | -4.1327220000 | -2.0682690000 | 0.0309420000  | H | 0.0457960000  | -0.0187030000 | 1.8174110000 |
| C | 1.6146920000  | -1.5576680000 | 0.0525030000  | H | -2.7950990000 | 5.1014970000  | 1.8902310000 |
| C | 0.2474900000  | 2.9328140000  | 0.0952380000  | H | 1.6200130000  | 0.7782710000  | 1.9070830000 |
| H | 5.9831330000  | 4.2809280000  | 0.1854660000  | C | 1.0865950000  | -0.1496240000 | 2.1275030000 |
| C | 4.0184580000  | 3.3902290000  | 0.1985720000  | C | 2.4058400000  | -2.2762740000 | 2.1840600000 |
| C | 2.7906900000  | -3.6206530000 | 0.2474540000  | H | 3.4360230000  | -5.4363970000 | 2.1913730000 |
| C | 2.6465230000  | 3.6024450000  | 0.3087540000  | C | -2.4464190000 | -2.2019520000 | 2.2279790000 |
| C | -2.9998120000 | 3.6362750000  | 0.3283850000  | H | 4.7962800000  | -4.3178110000 | 2.2825830000 |
| H | 4.6585080000  | 5.4452130000  | 0.3315170000  | C | -2.7580990000 | 1.7409840000  | 2.3388210000 |
| H | 0.0975050000  | 3.9728540000  | 0.3877890000  | C | -3.8275190000 | -2.2088810000 | 2.4338690000 |
| C | 5.0000070000  | 4.4511740000  | 0.6274470000  | C | 3.7198810000  | -4.4143100000 | 2.4498640000 |
| H | 2.2856930000  | 4.5566520000  | 0.6846270000  | C | -2.7059750000 | 3.0970080000  | 2.6612930000 |
| H | -2.9584770000 | 0.2836800000  | 0.7809400000  | H | -1.7729180000 | -2.2857400000 | 3.0773600000 |
| H | -0.8387180000 | -2.1293120000 | 0.8051270000  | H | -2.6668830000 | 0.9853350000  | 3.1123980000 |
| H | -0.2247860000 | 2.3018420000  | 0.8559350000  | H | 1.1038590000  | -0.3096970000 | 3.2058470000 |
| C | -1.9113600000 | -2.1009360000 | 0.9523890000  | H | 2.4920180000  | -2.1186850000 | 3.2549980000 |
| C | -2.9270060000 | 1.3413880000  | 1.0190720000  | H | -4.2444610000 | -2.2792570000 | 3.4315660000 |
| C | -4.6578540000 | -2.1653300000 | 1.3108690000  | H | 3.5305070000  | -4.2636580000 | 3.5133370000 |
| C | 1.7143030000  | -1.3263990000 | 1.4250710000  | H | -2.5690430000 | 3.4107450000  | 3.6900670000 |

## 11. References

- [1] A. I. Vogel, B. S. Furniss, A. J. Hannaford, V. Rogers, P. W. G. Smith and A. R. Tatchell, *Vogel's Textbook of Practical Organic Chemistry 5th Ed.*, Prentice Hall: Harlow, **1996**, p. 456.
- [2] D. Seebach, R. Imwinkelried and G. Stucky, *Helv. Chim. Acta* **1987**, *70*, 448-464.
- [3] M. Bielawski, M. Zhu and B. Olofsson, *Adv. Synth. Catal.* **2007**, *349*, 2610-2618.
- [4] M. Zhu, N. Jalalian and B. Olofsson, *Synlett* **2008**, *2008*, 592-596.
- [5] L. Racicot *PhD thesis*, University of British Columbia, **2016** DOI: 10.14288/1.0318063.
- [6] M. Bielawski, M. Zhu and B. Olofsson, *Adv. Synth. Catal.* **2007**, *349*, 2610-2618.
- [7] M. Wang and Z. Huang, *Org. Biomol. Chem.* **2016**, *14*, 10185-10188.
- [8] T. L. Seidl, S. K. Sundalam, B. McCullough and D. R. Stuart, *J. Org. Chem.* **2016**, *81*, 1998-2009.
- [9] N. Miralles, R. M. Romero, E. Fernandez and K. Muniz, *Chem. Commun.* **2015**, *51*, 14068-14071.
- [10] M. Bielawski, D. Aili and B. Olofsson, *J. Org. Chem.* **2008**, *73*, 4602-4607.
- [11] C. Dey, E. Lindstedt and B. Olofsson, *Org. Lett.* **2015**, *17*, 4554-4557.
- [12] S. K. Sundalam, A. Nilova, T. L. Seidl and D. R. Stuart, *Angew. Chem. Int. Ed.* **2016**, *55*, 8431-8434.
- [13] T. Dohi, N. Yamaoka and Y. Kita, *Tetrahedron* **2010**, *66*, 5775-5785.
- [14] L. Wang, S. Shang, G. Li, L. Ren, Y. Lv and S. Gao, *J. Org. Chem.* **2016**, *81*, 2189-2193.
- [15] R. P. Hanzlik and G. O. Shearer, *J. Am. Chem. Soc.* **1975**, *97*, 5231-5233.
- [16] K. Zhu, M. P. Shaver and S. P. Thomas, *Eur. J. Org. Chem.* **2015**, *2015*, 2119-2123.
- [17] V. Gauchot, W. Kroutil and A. R. Schmitzer, *Chem. Eur. J.* **2010**, *16*, 6748-6751.
- [18] N. Jalalian, E. E. Ishikawa, L. F. Silva and B. Olofsson, *Org. Lett.* **2011**, *13*, 1552-1555.
- [19] A. B. Naidu, E. A. Jaseer and G. Sekar, *J. Org. Chem.* **2009**, *74*, 3675-3679.
- [20] T. Mino, F. Yagishita, M. Shibuya, K. Kajiwara, H. Shindo, M. Sakamoto and T. Fujita, *Synlett* **2009**, *2009*, 2457-2460.
- [21] A. Tlili, F. Monnier and M. Taillefer, *Chem. Eur. J.* **2010**, *16*, 12299-12302.
- [22] H.-J. Cristau, P. P. Cellier, S. Hamada, J.-F. Spindler and M. Taillefer, *Org. Lett.* **2004**, *6*, 913-916.
- [23] F.-F. Yong, Y.-C. Teo, Y.-K. Yan and G.-L. Chua, *Synlett* **2012**, *2012*, 101-106.
- [24] A. B. Naidu, E. A. Jaseer and G. Sekar, *J. Org. Chem.* **2009**, *74*, 3675-3679.
- [25] L. F. Tietze and F. Lotz, *Eur. J. Org. Chem.* **2006**, *2006*, 4676-4684.
- [26] L. Ackermann, A. R. Kapdi, S. Fenner, C. Kornhaas and C. Schulzke, *Chem. Eur. J.* **2011**, *17*, 2965-2971.
- [27] E. Lindstedt, R. Ghosh and B. Olofsson, *Org. Lett.* **2013**, *15*, 6070-6073.
- [28] E. Fillion, V. É. Trépanier, J. J. Heikkinen, A. A. Remorova, R. J. Carson, J. M. Goll and A. Seed, *Organometallics* **2009**, *28*, 3518-3531.
- [29] a) J. Chen, K. Zhao, B. Ge, C. Xu, D. Wang and Y. Ding, *Chem. Asian J.* **2015**, *10*, 468-473; b) H. Xu and Y. Chen, *Synth. Commun.* **2007**, *37*, 2411-2420.
- [30] I. Sapountzis, W. Lin, M. Fischer and P. Knochel, *Angew. Chem. Int. Ed.* **2004**, *43*, 4364-4366.
- [31] A. Bartoszewicz, R. Marcos, S. Sahoo, A. K. Inge, X. Zou and B. Martín-Matute, *Chem. Eur. J.* **2012**, *18*, 14510-14519.
- [32] S. Vanderheiden, B. Bulat, T. Zevaco, N. Jung and S. Brase, *Chem. Commun.* **2011**, *47*, 9063-9065.
- [33] Y. Fang, Y. Zheng and Z. Wang, *Eur. J. Org. Chem.* **2012**, *2012*, 1495-1498.
- [34] S. K. Sundalam and D. R. Stuart, *J. Org. Chem.* **2015**, *80*, 6456-6466.
- [35] M. J. Frisch, G. W. Trucks, H. B. Schlegel, G. E. Scuseria, M. A. Robb, J. R. Cheeseman, G. Scalmani, V. Barone, B. Mennucci, G. A. Petersson, H. Nakatsuji, M. Caricato, X. Li, H. P. Hratchian, A. F. Izmaylov, J. Bloino, G. Zheng, J. L. Sonnenberg, M. Hada, M. Ehara, K. Toyota, R. Fukuda, J. Hasegawa, M. Ishida, T. Nakajima, Y. Honda, O. Kitao, H. Nakai, T. Vreven, J. A. Montgomery, J. E. Peralta, F. Ogliaro, M. Bearpark, J. J. Heyd, E. Brothers, K. N. Kudin, V. N. Staroverov, R. Kobayashi, J. Normand, K. Raghavachari, A. Rendell, J. C. Burant, S. S. Iyengar, J. Tomasi, M. Cossi, N. Rega, J. M. Millam, M. Klene, J. E. Knox, J. B. Cross, V. Bakken, C. Adamo, J. Jaramillo, R. Gomperts, R. E. Stratmann, O. Yazyev, A. J. Austin, R. Cammi, C. Pomelli, J. W. Ochterski, R. L. Martin, K. Morokuma, V. G. Zakrzewski, G. A. Voth, P. Salvador, J. J. Dannenberg, S. Dapprich, A. D. Daniels, Farkas, J. B. Foresman, J. V. Ortiz, J. Cioslowski and D. J. Fox in *Gaussian 09, Revision B.01, Vol.* Wallingford CT, **2009**.
- [36] A. D. Becke, *J. Chem. Phys.* **1993**, *98*, 5648-5652.
- [37] S. Grimme, J. Antony, S. Ehrlich and H. Krieg, *J. Chem. Phys.* **2010**, *132*, 154104.

- [38] Y. Zhao and D. G. Truhlar, *Theor. Chem. Acc.* **2008**, *120*, 215-241.
- [39] A. Bergner, M. Dolg, W. Küchle, H. Stoll and H. Preuß, *Mol. Phys.* **1993**, *80*, 1431-1441.
- [40] a) T. Clark, J. Chandrasekhar, G. W. Spitznagel and P. V. R. Schleyer, *J. Comp. Chem.* **1983**, *4*, 294-301; b) R. Krishnan, J. S. Binkley, R. Seeger and J. A. Pople, *J. Chem. Phys.* **1980**, *72*, 650-654; c) A. D. McLean and G. S. Chandler, *J. Chem. Phys.* **1980**, *72*, 5639-5648.
- [41] a) M. Cossi, G. Scalmani, N. Rega and V. Barone, *J. Chem. Phys.* **2002**, *117*, 43-54; b) E. Cancès, B. Mennucci and J. Tomasi, *J. Chem. Phys.* **1997**, *107*, 3032-3041; c) B. Mennucci and J. Tomasi, *J. Chem. Phys.* **1997**, *106*, 5151.
- [42] M. Reitti, P. Villo and B. Olofsson, *Angew. Chem. Int. Ed.* **2016**, *55*, 8928-8932.

## 12. Copies of $^1\text{H}$ and $^{13}\text{C}$ NMR

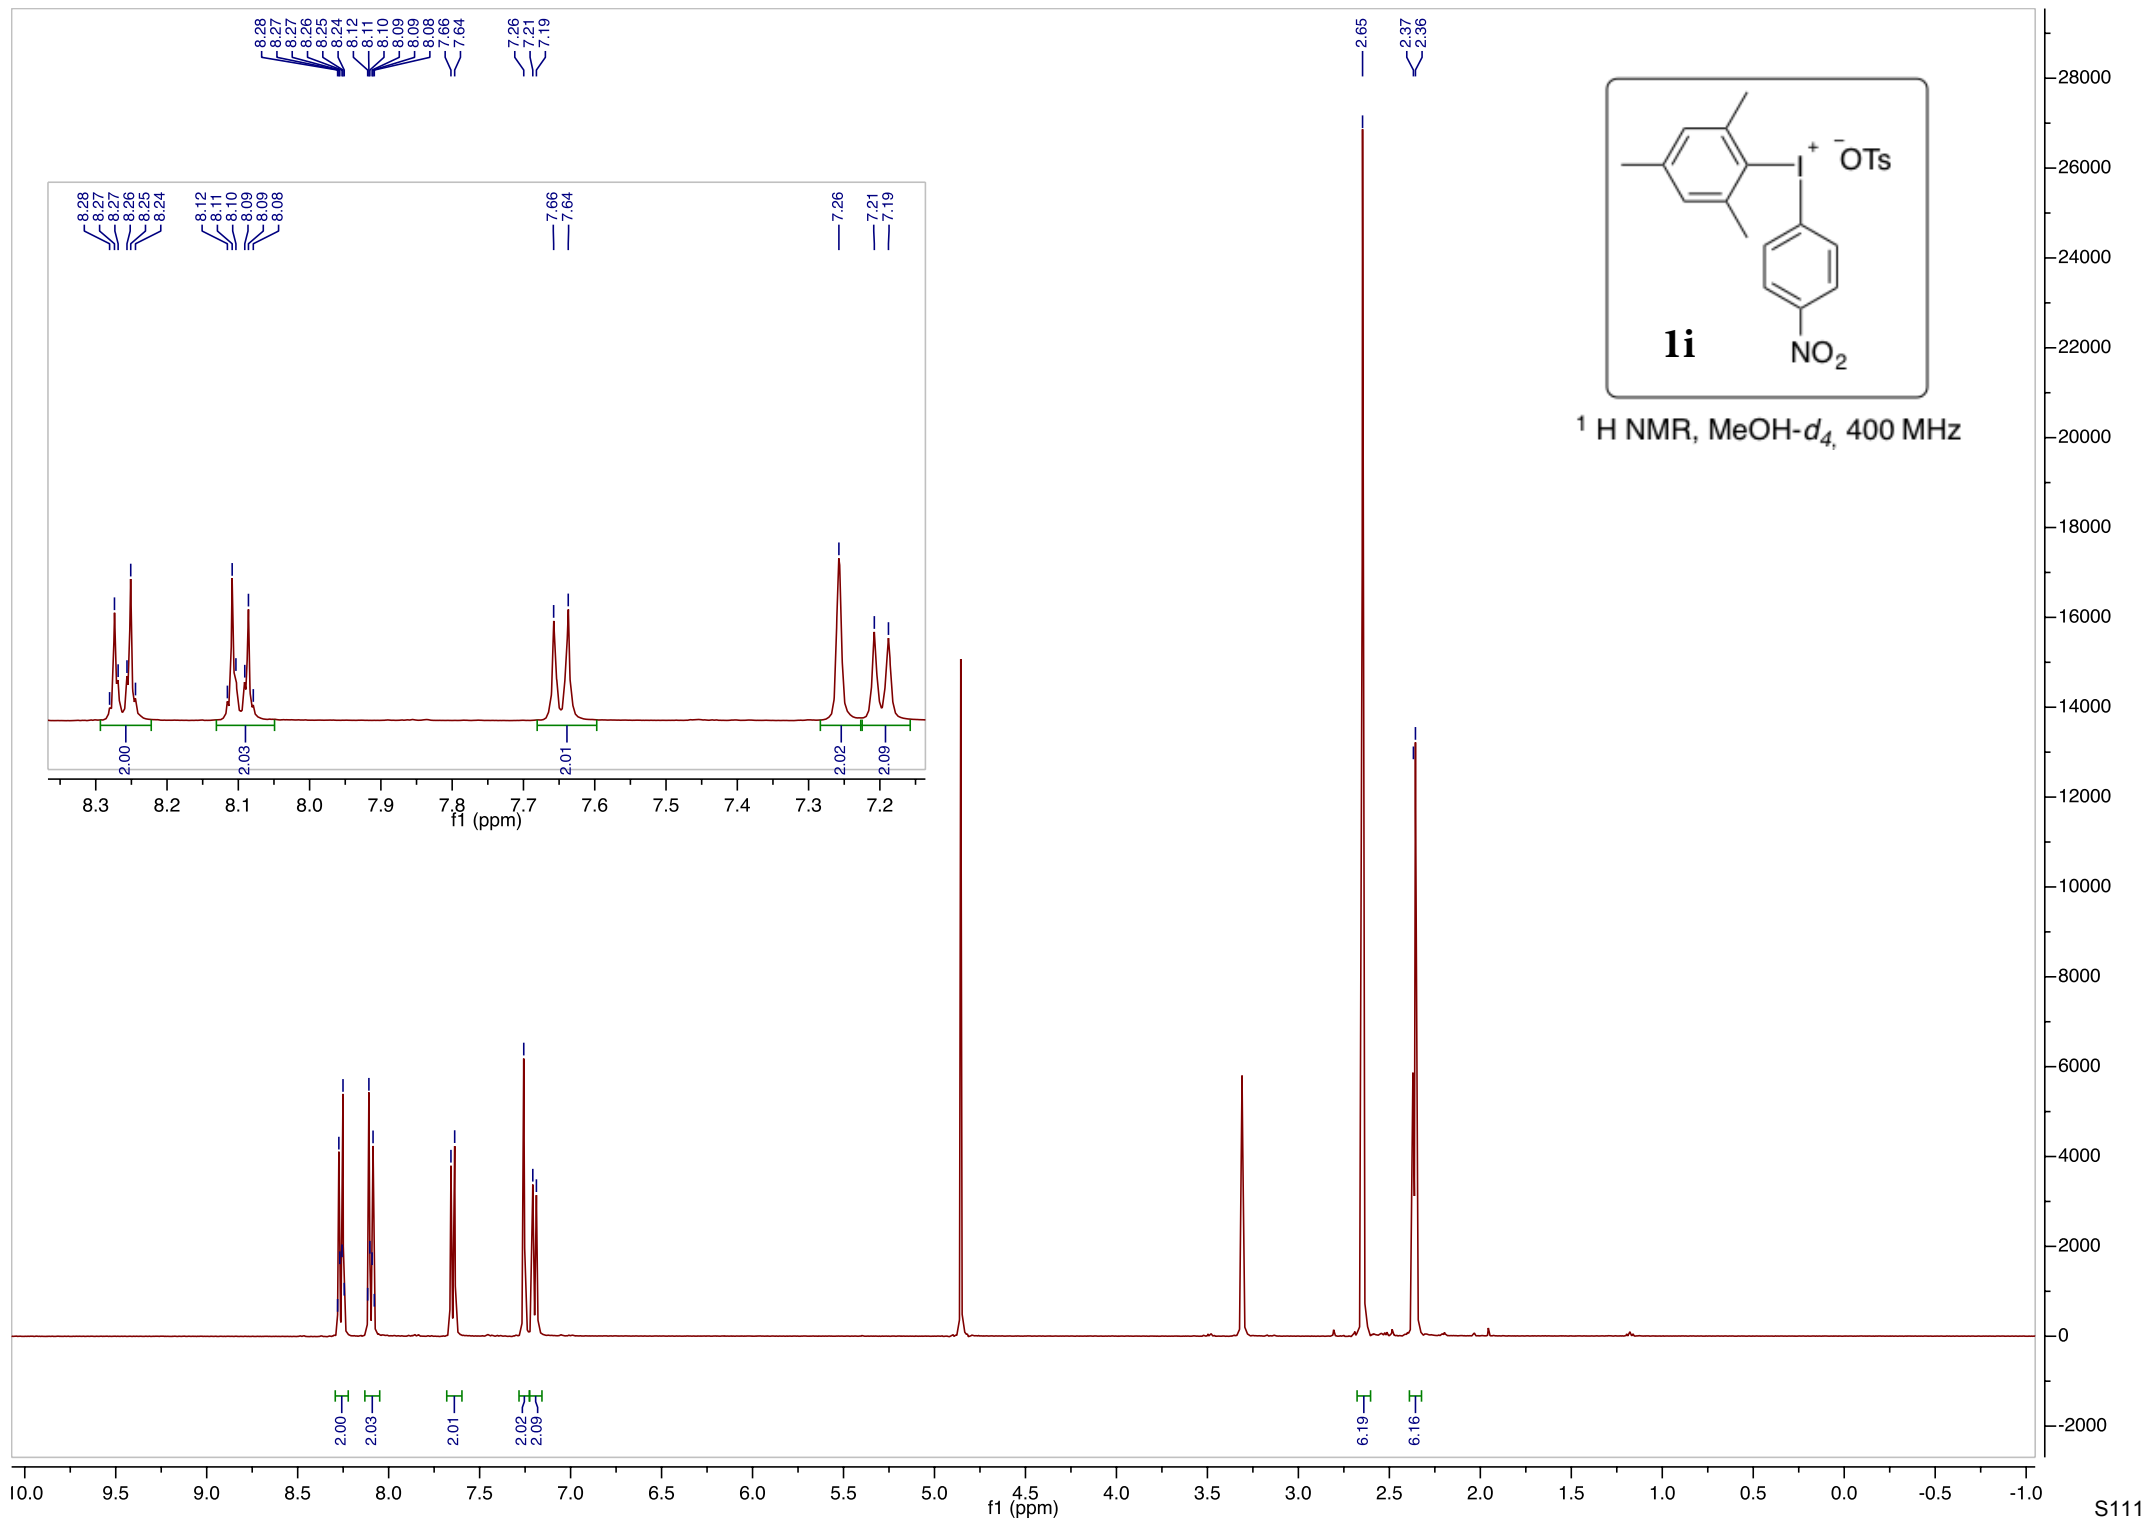

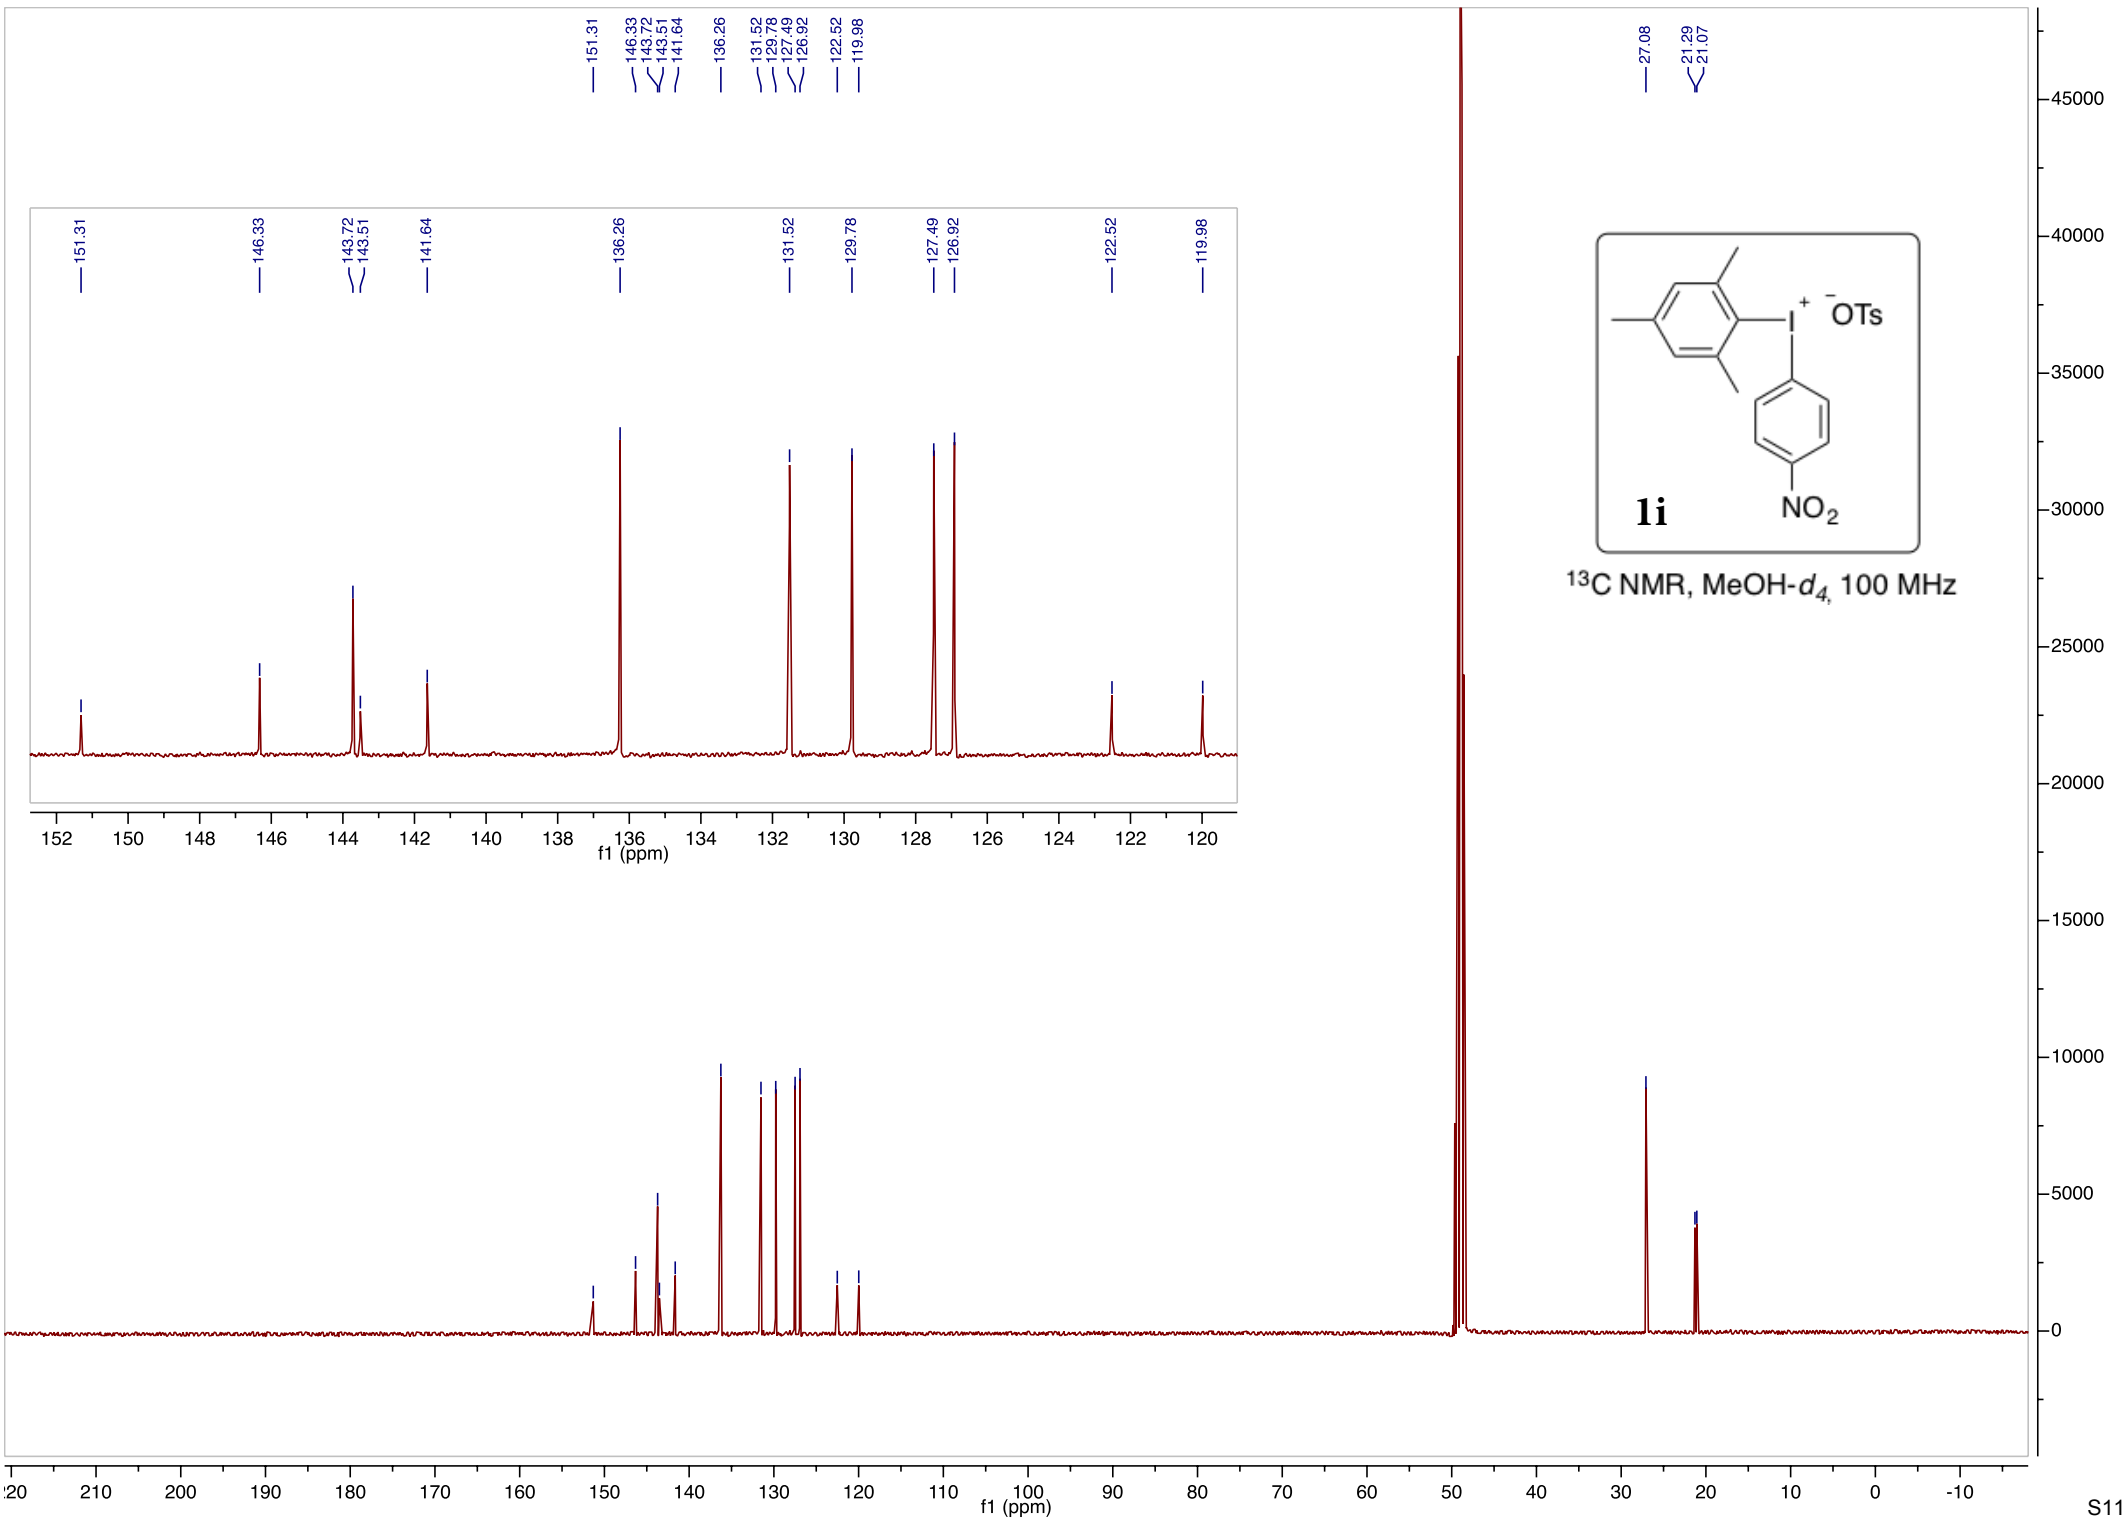

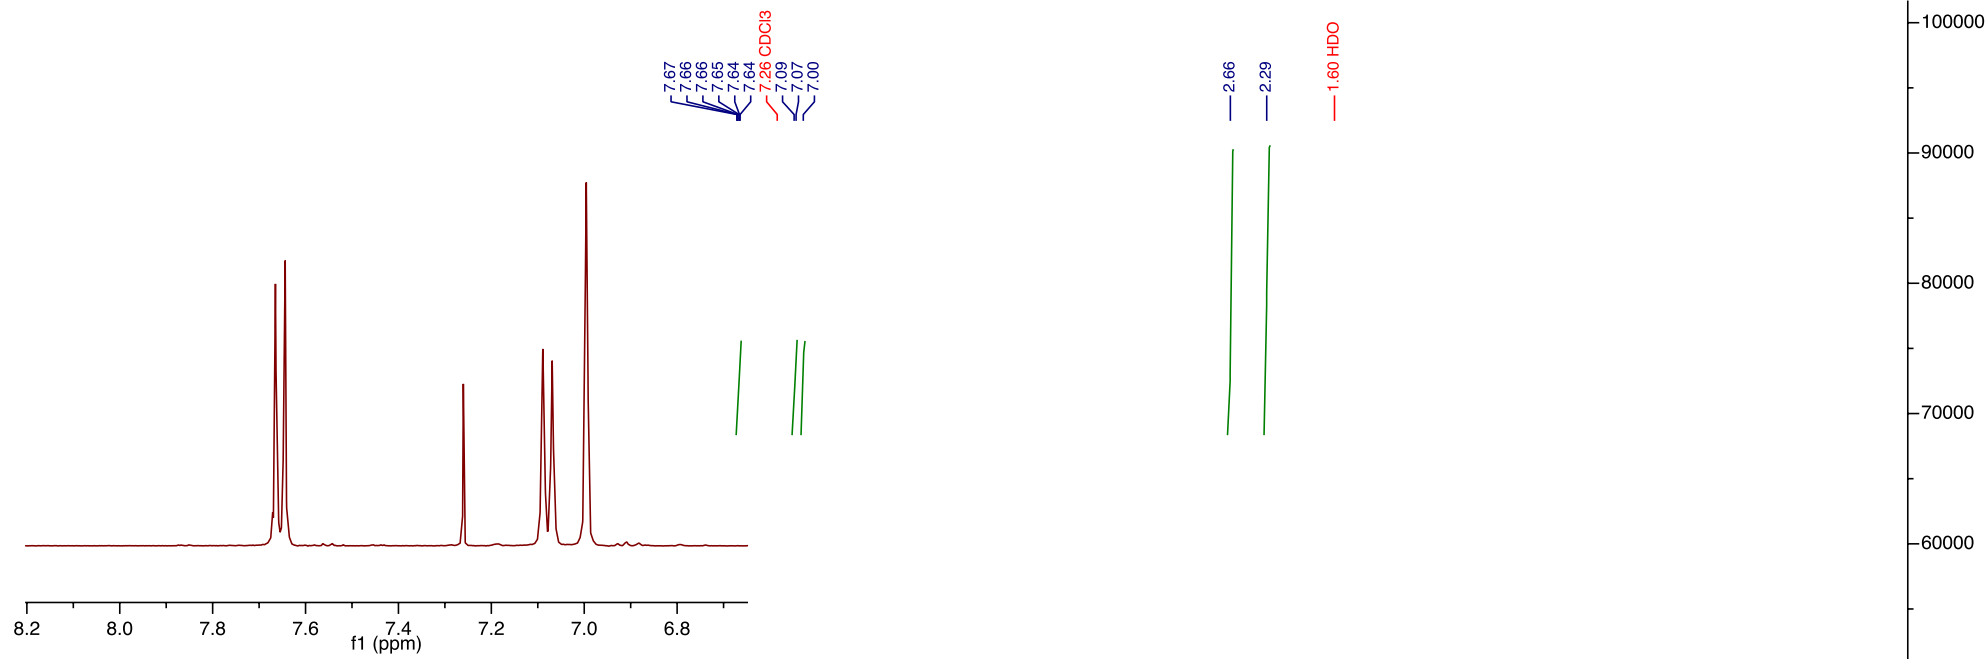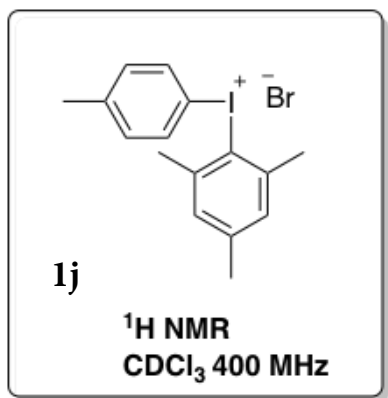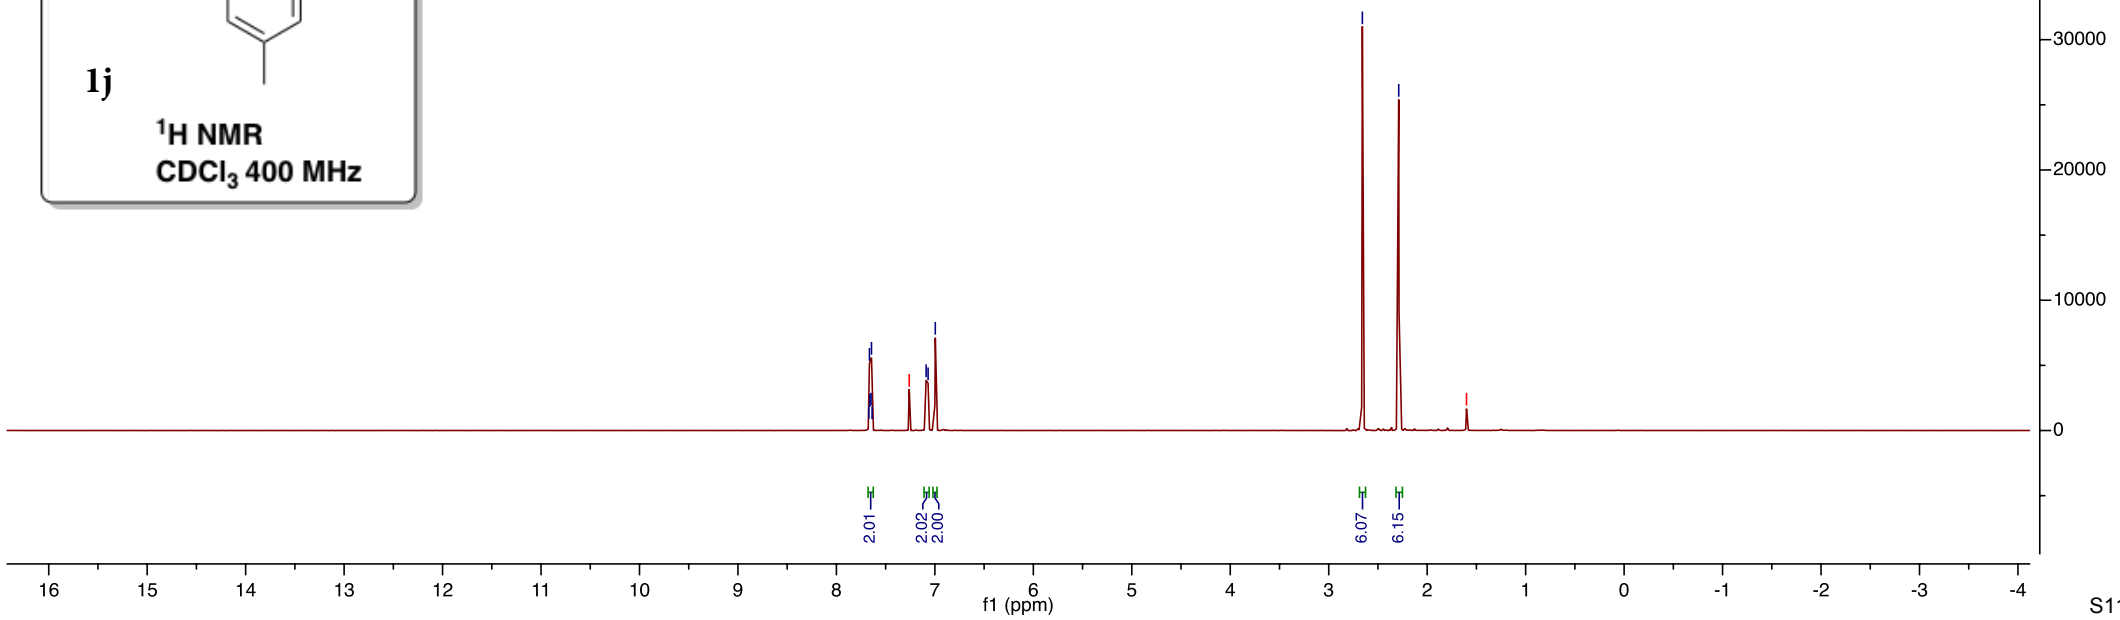

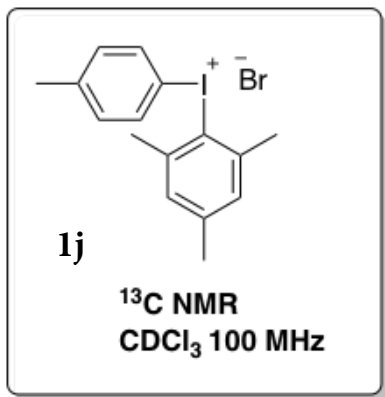

142.69  
141.48  
140.98

132.83  
132.16  
129.89  
126.83

115.62

77.48  $\text{CDCl}_3$   
77.16  $\text{CDCl}_3$   
76.84  $\text{CDCl}_3$

27.20

21.28  
21.20

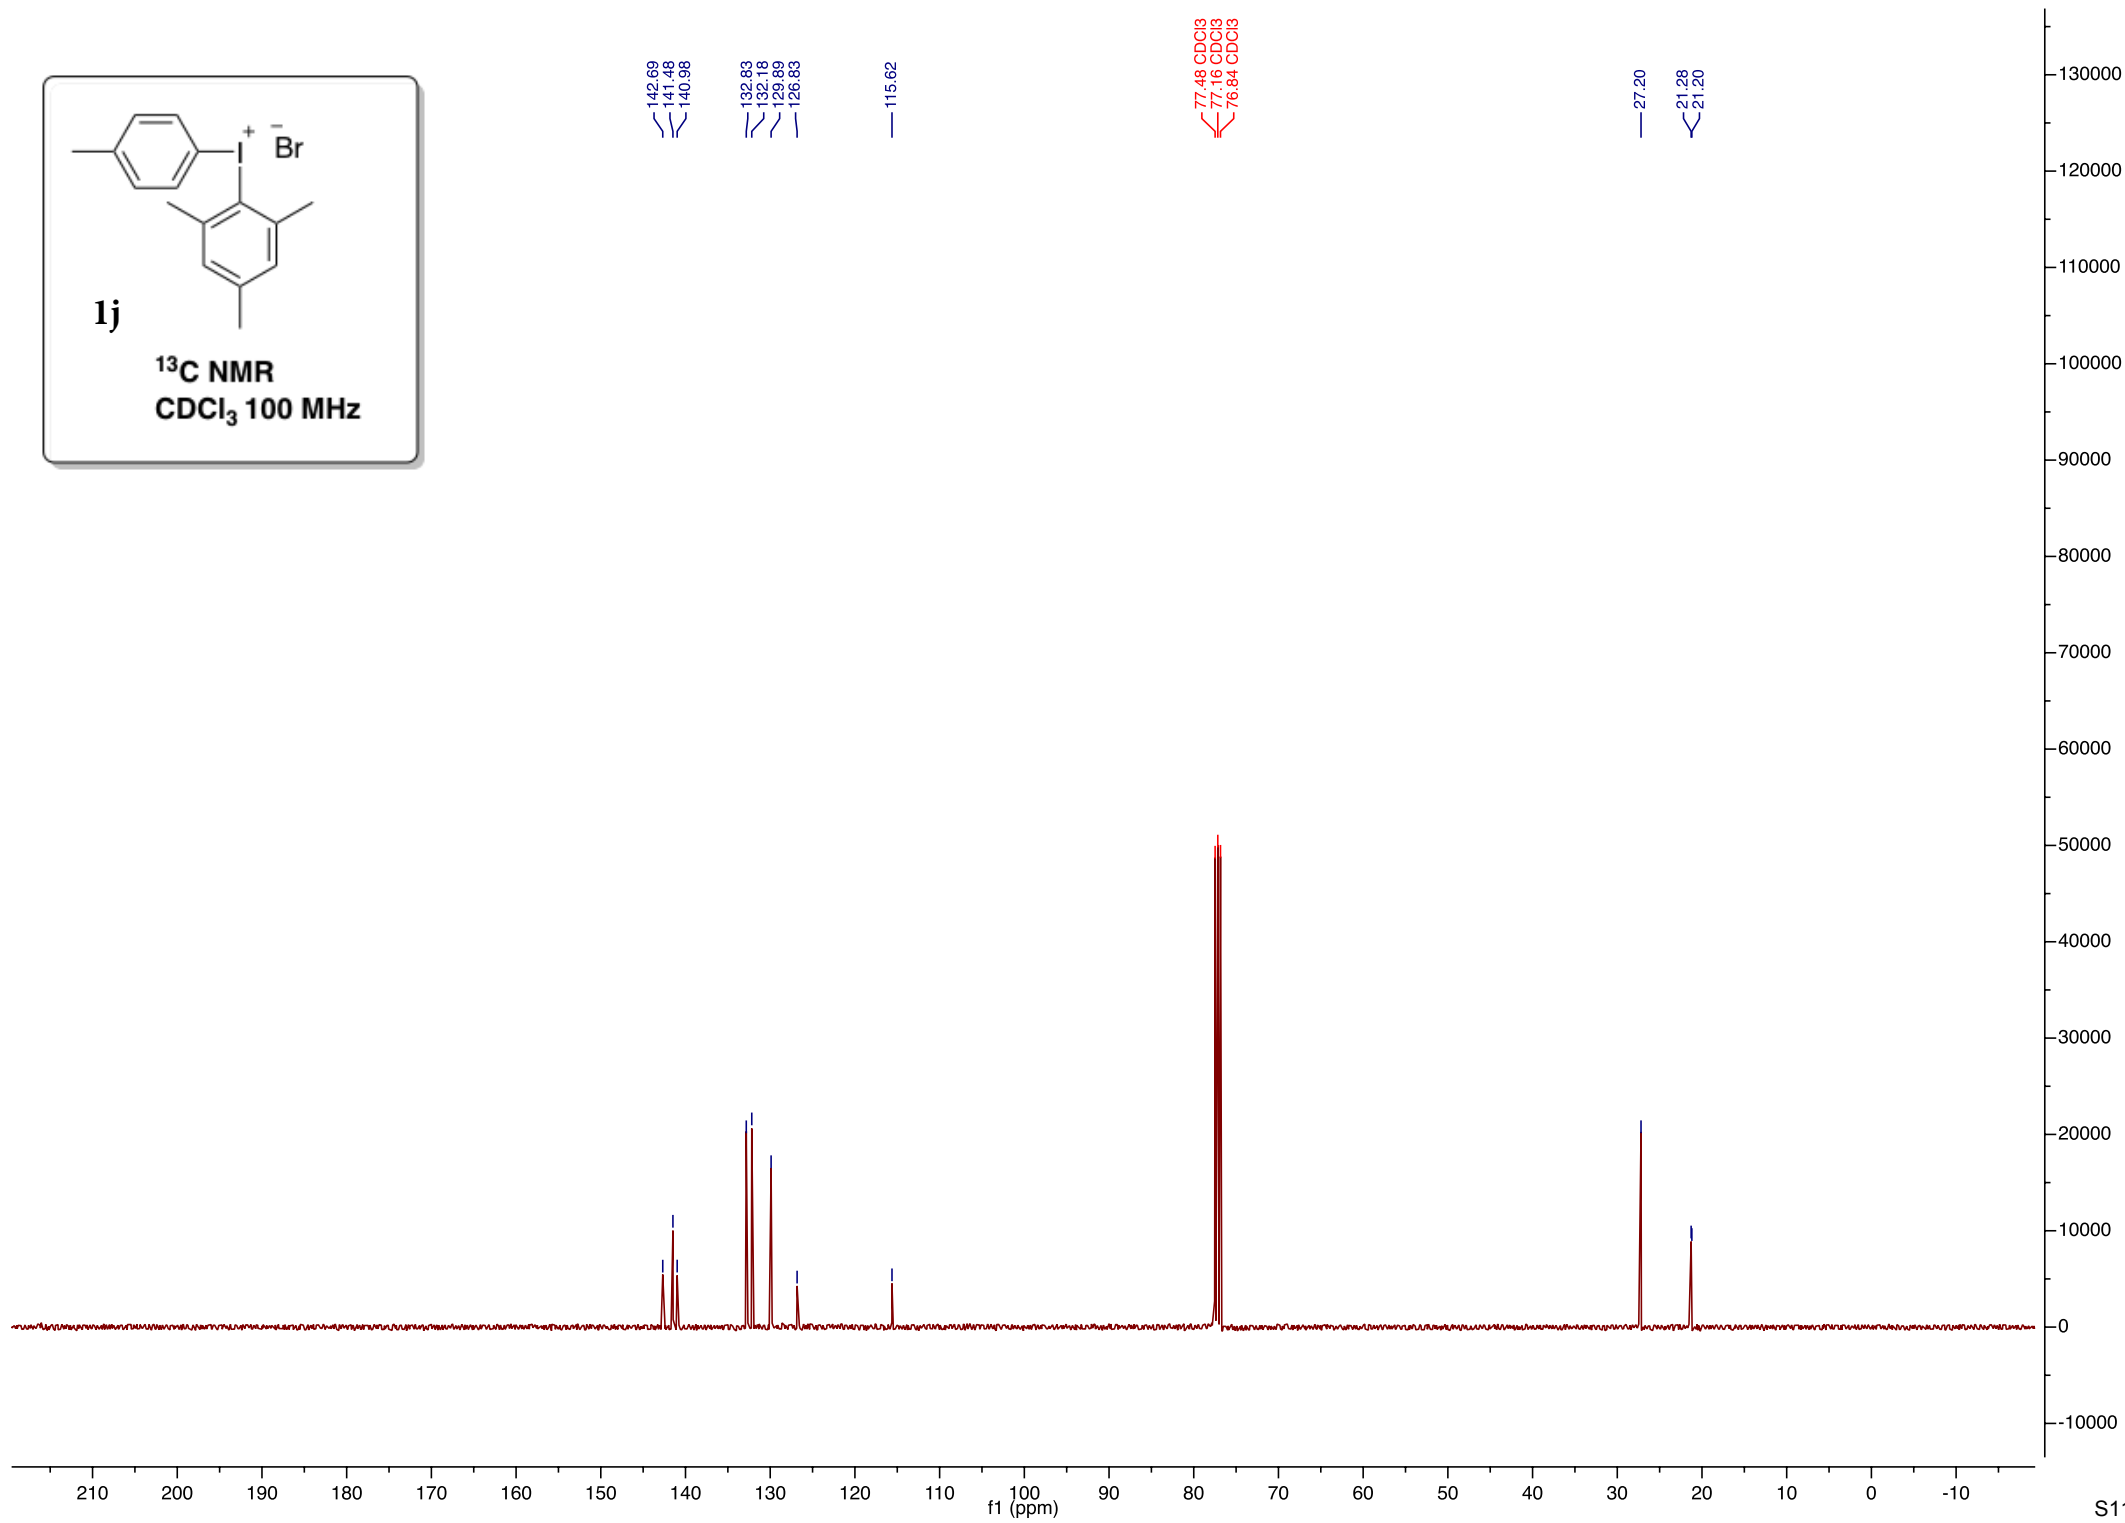

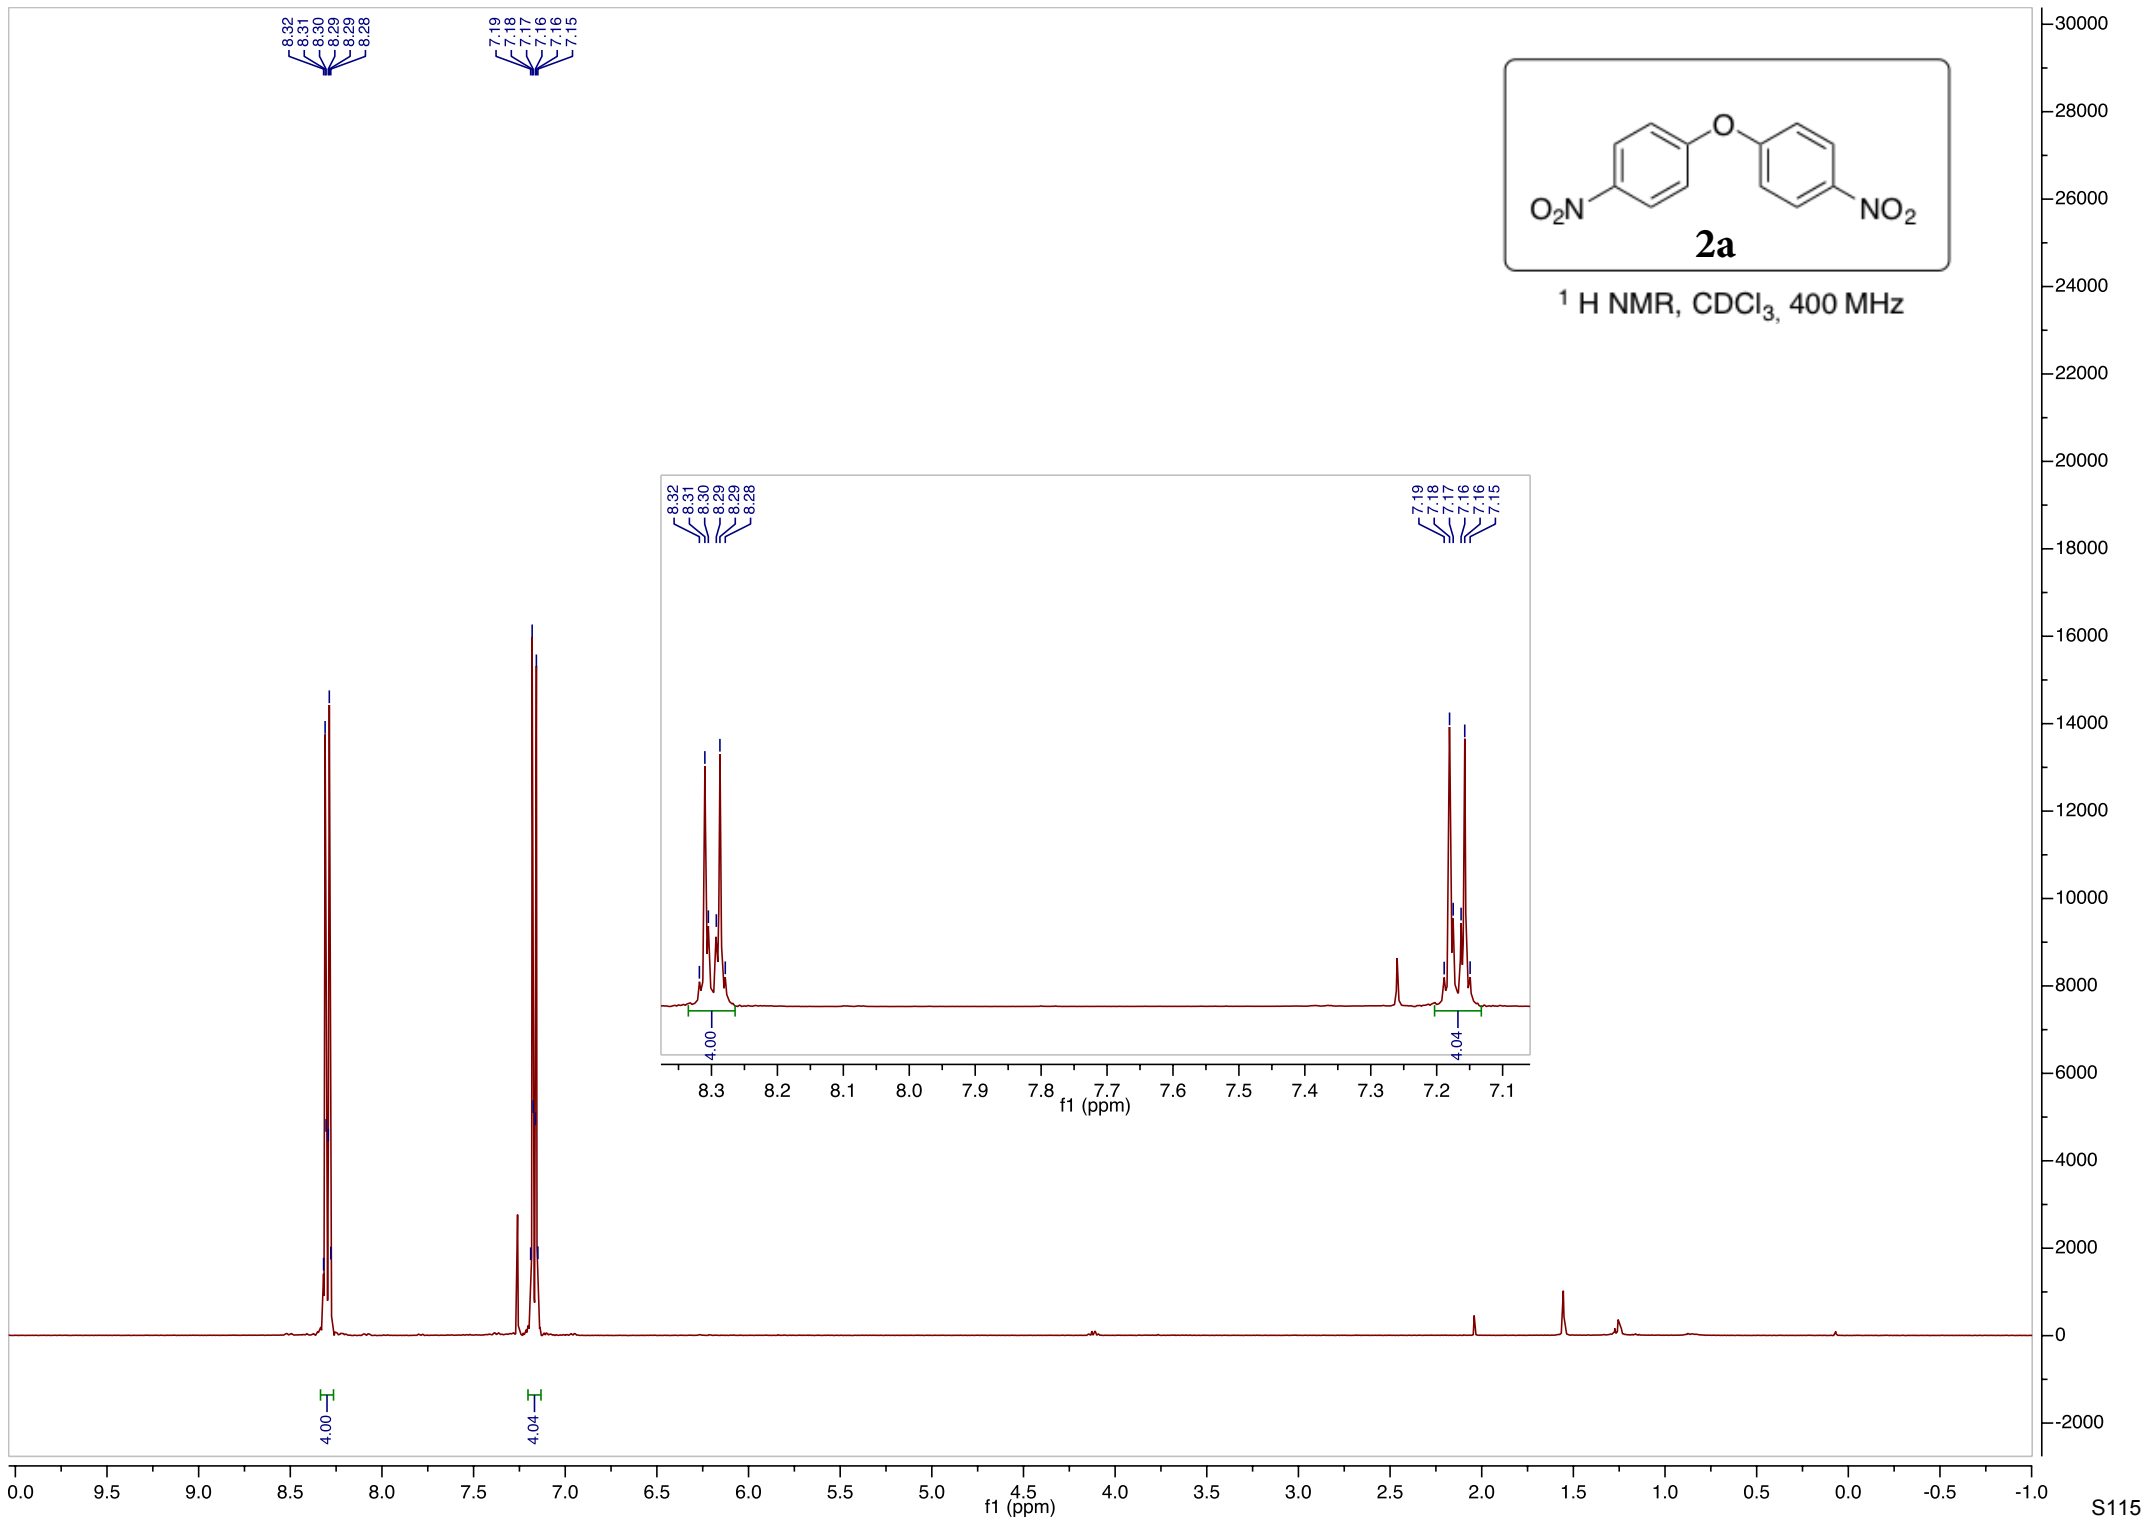



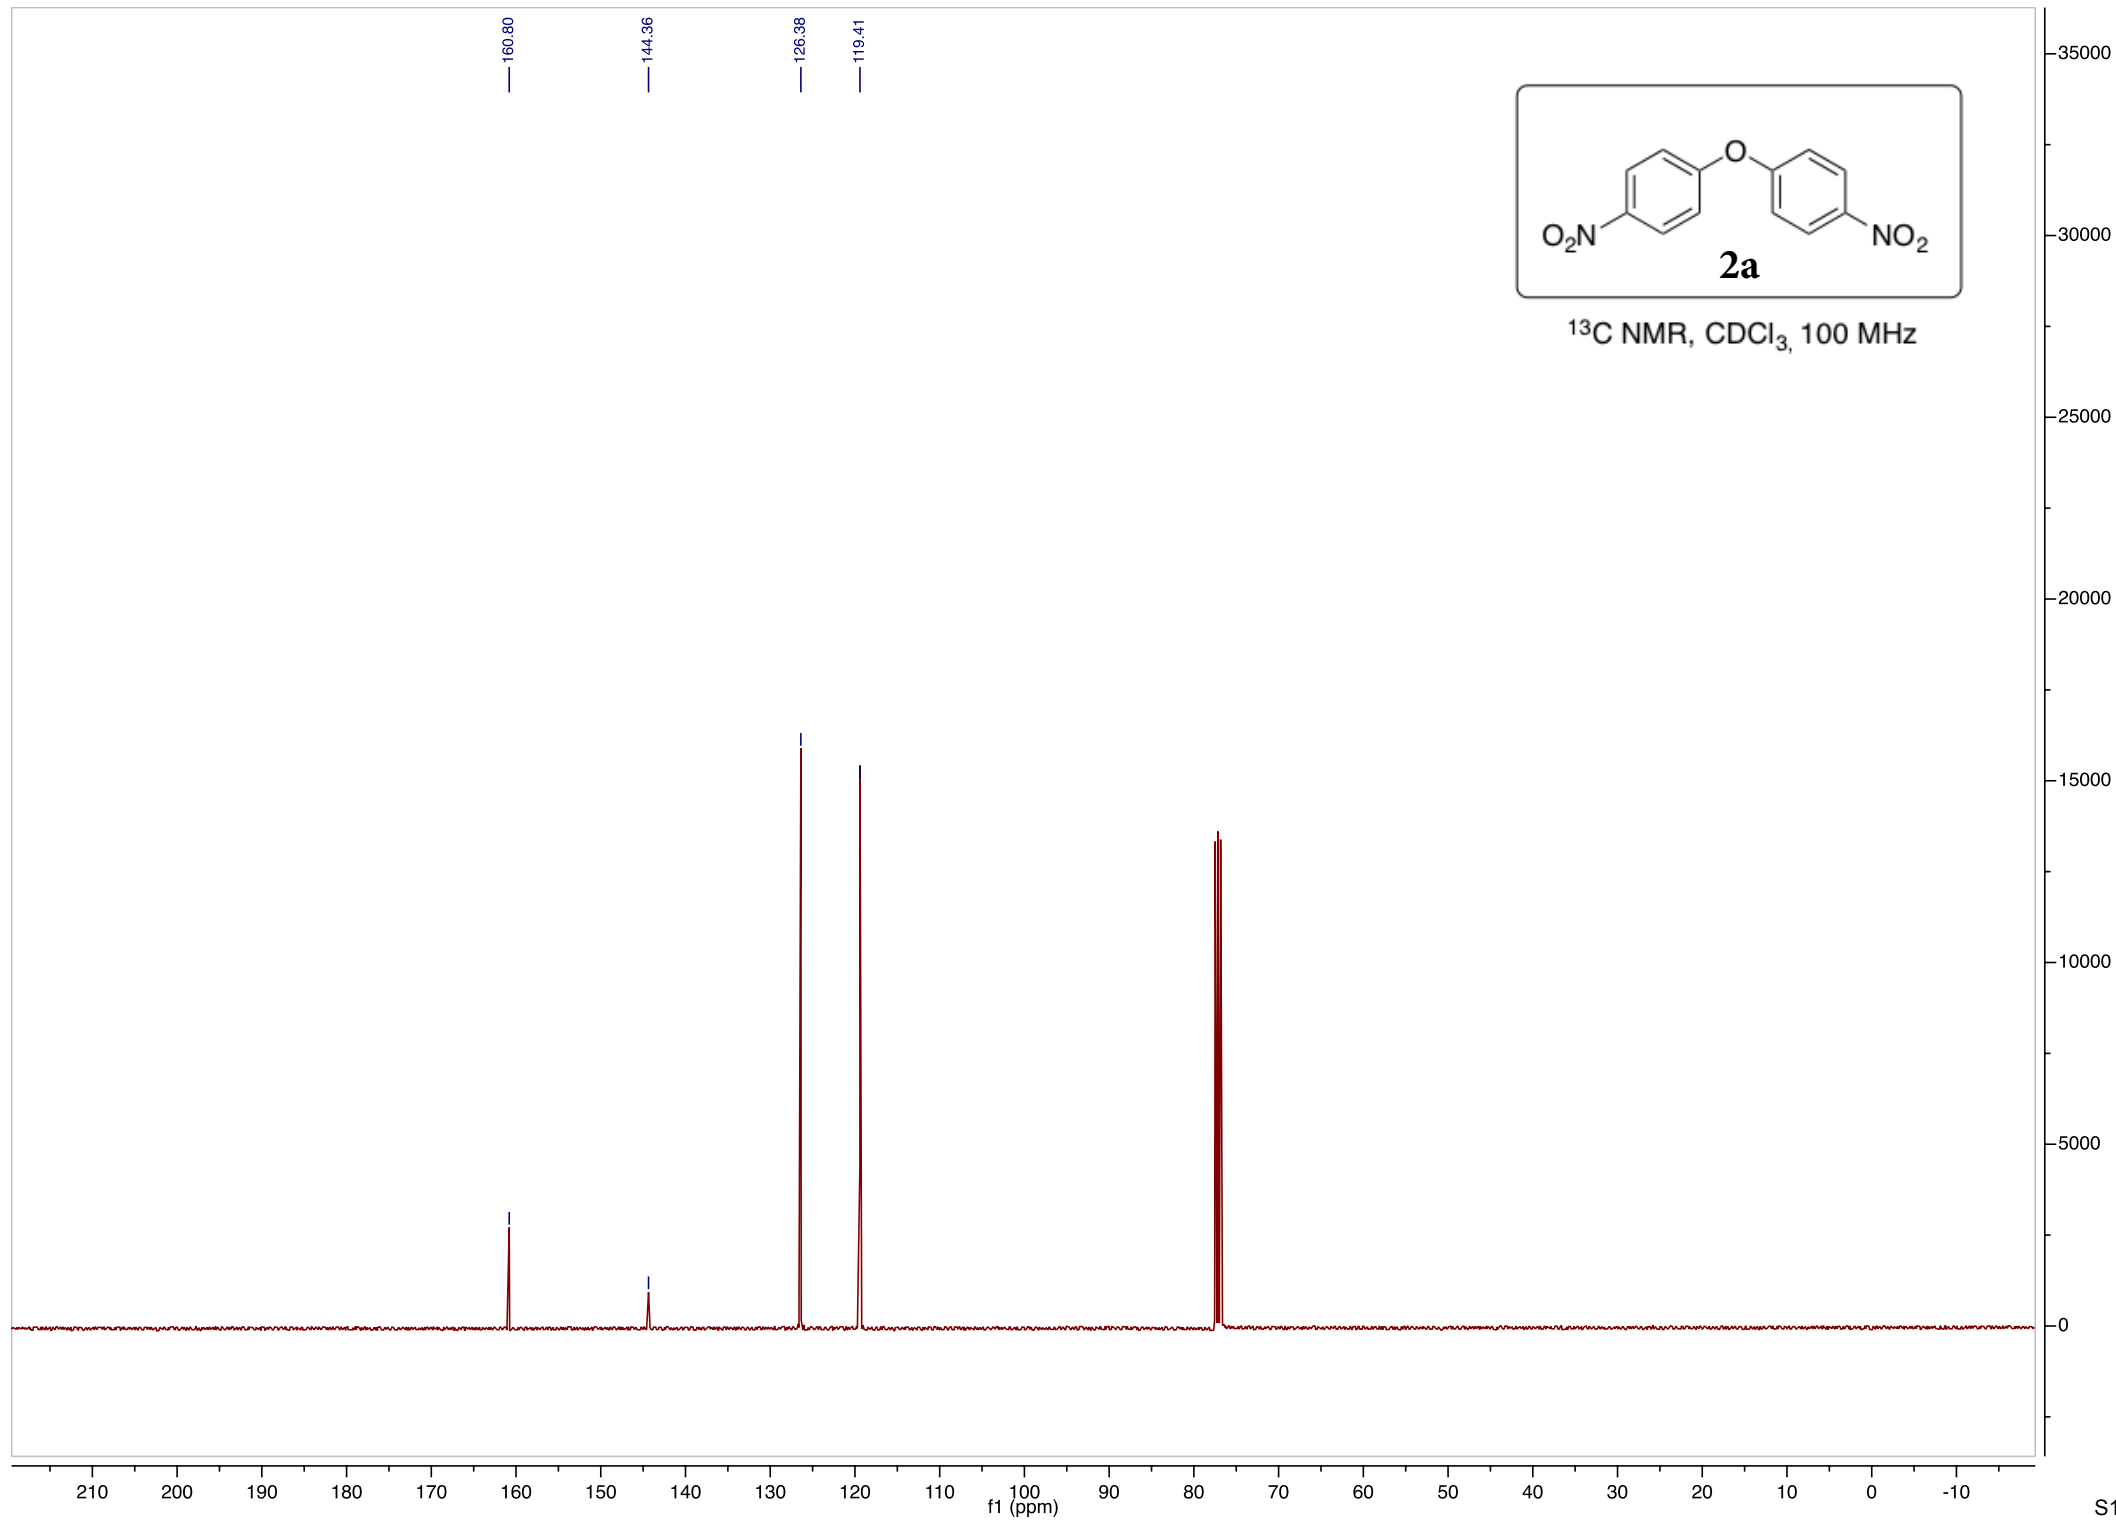

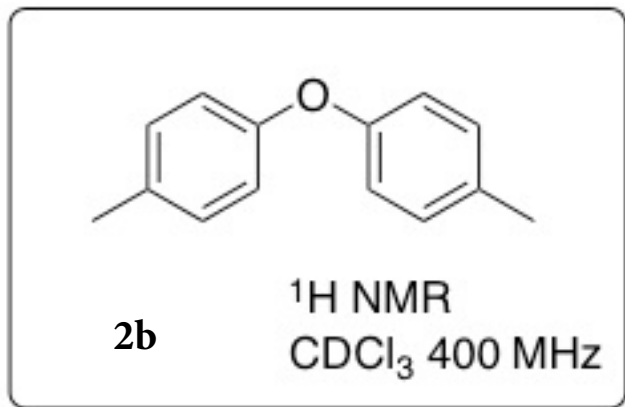

7.26 CDCl<sub>3</sub>  
7.13  
7.11  
6.91  
6.90  
6.89  
6.88

2.33

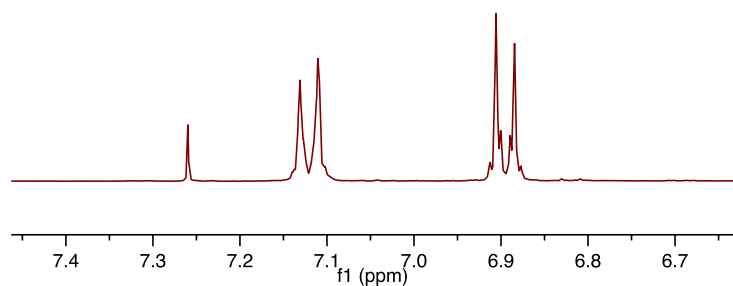

4.00  
3.95

6.00

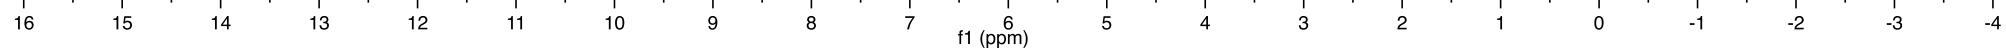

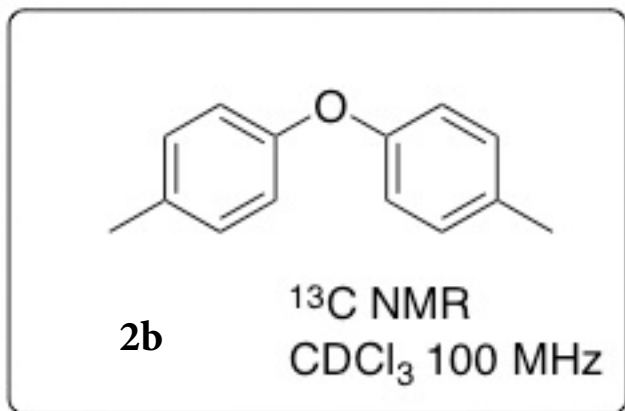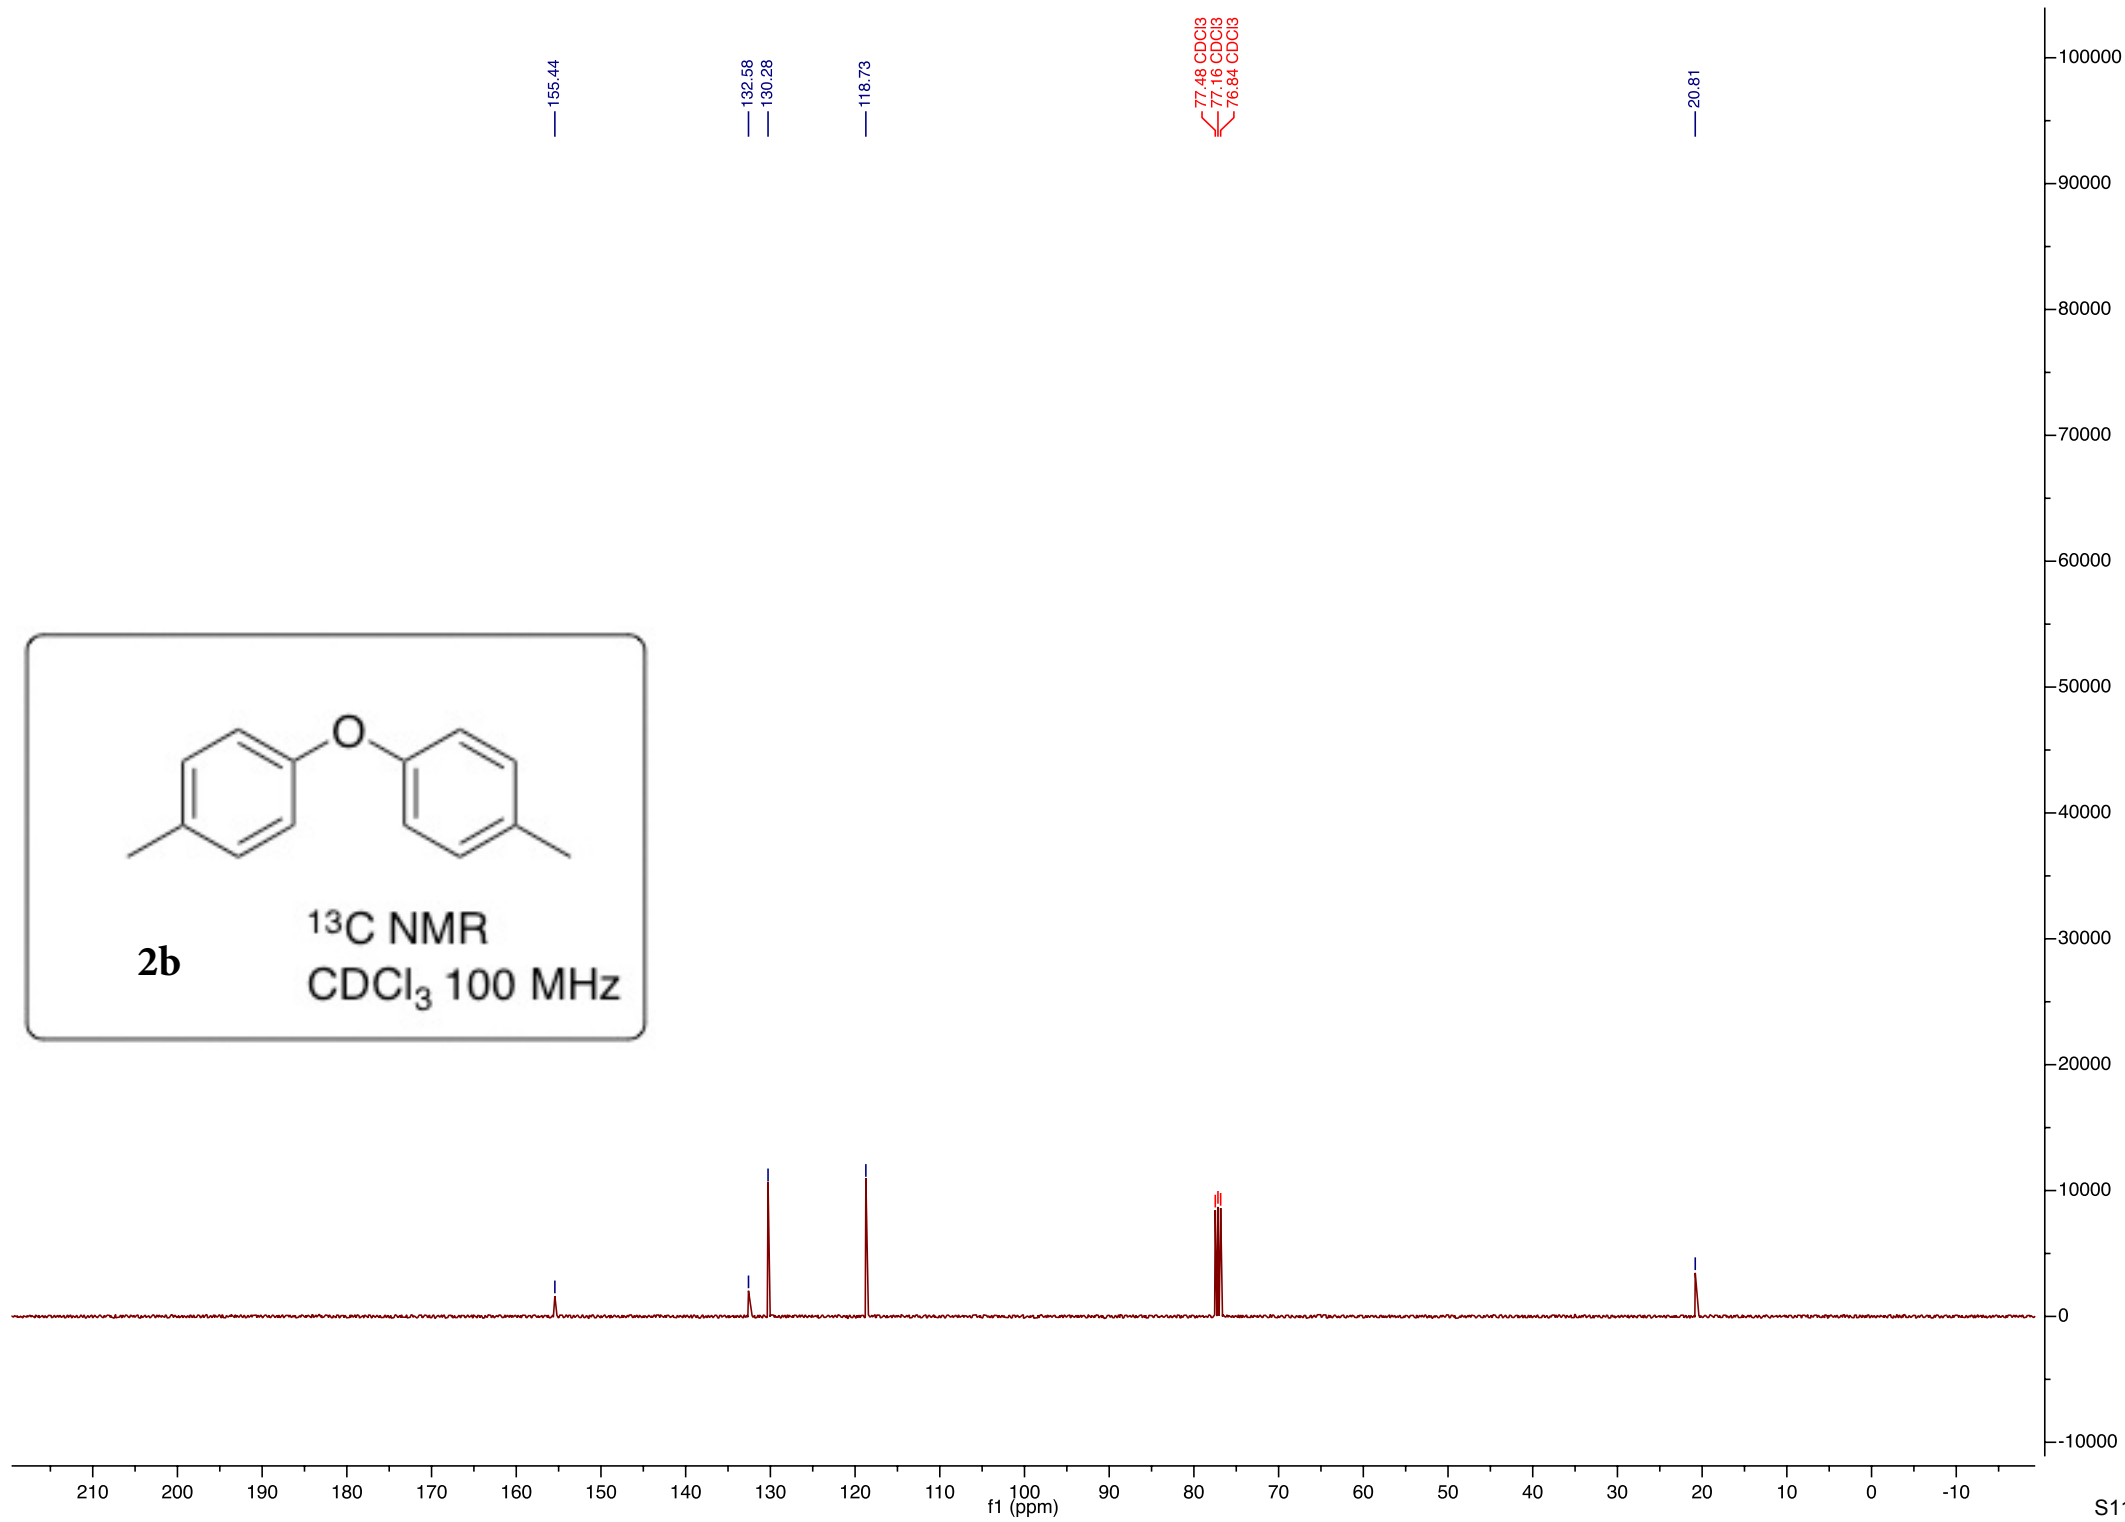

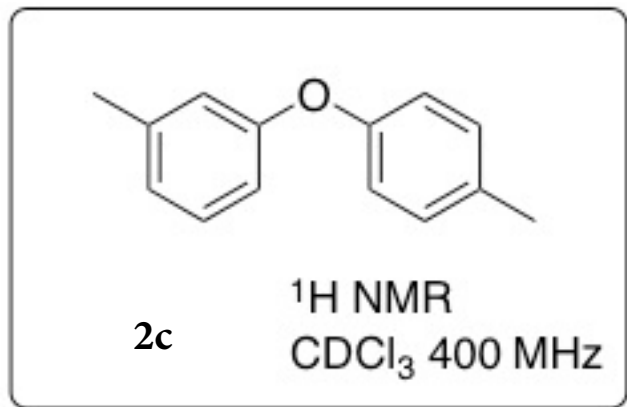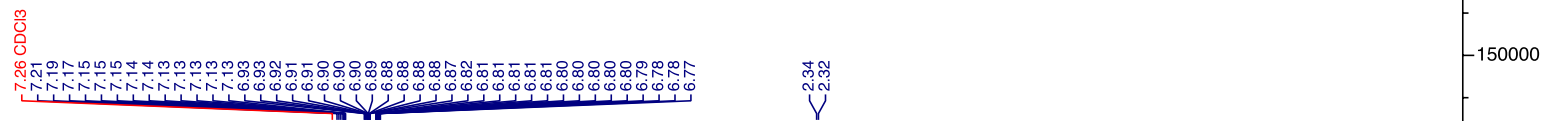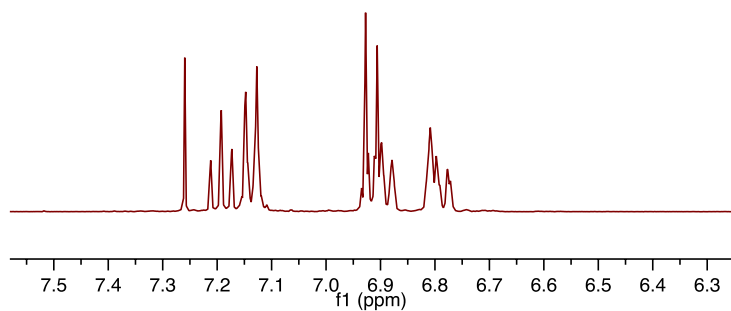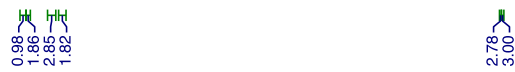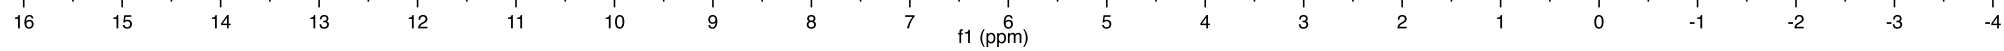

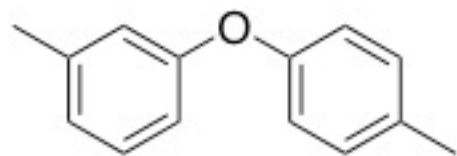

2c

<sup>13</sup>C NMR  
CDCl<sub>3</sub> 100 MHz

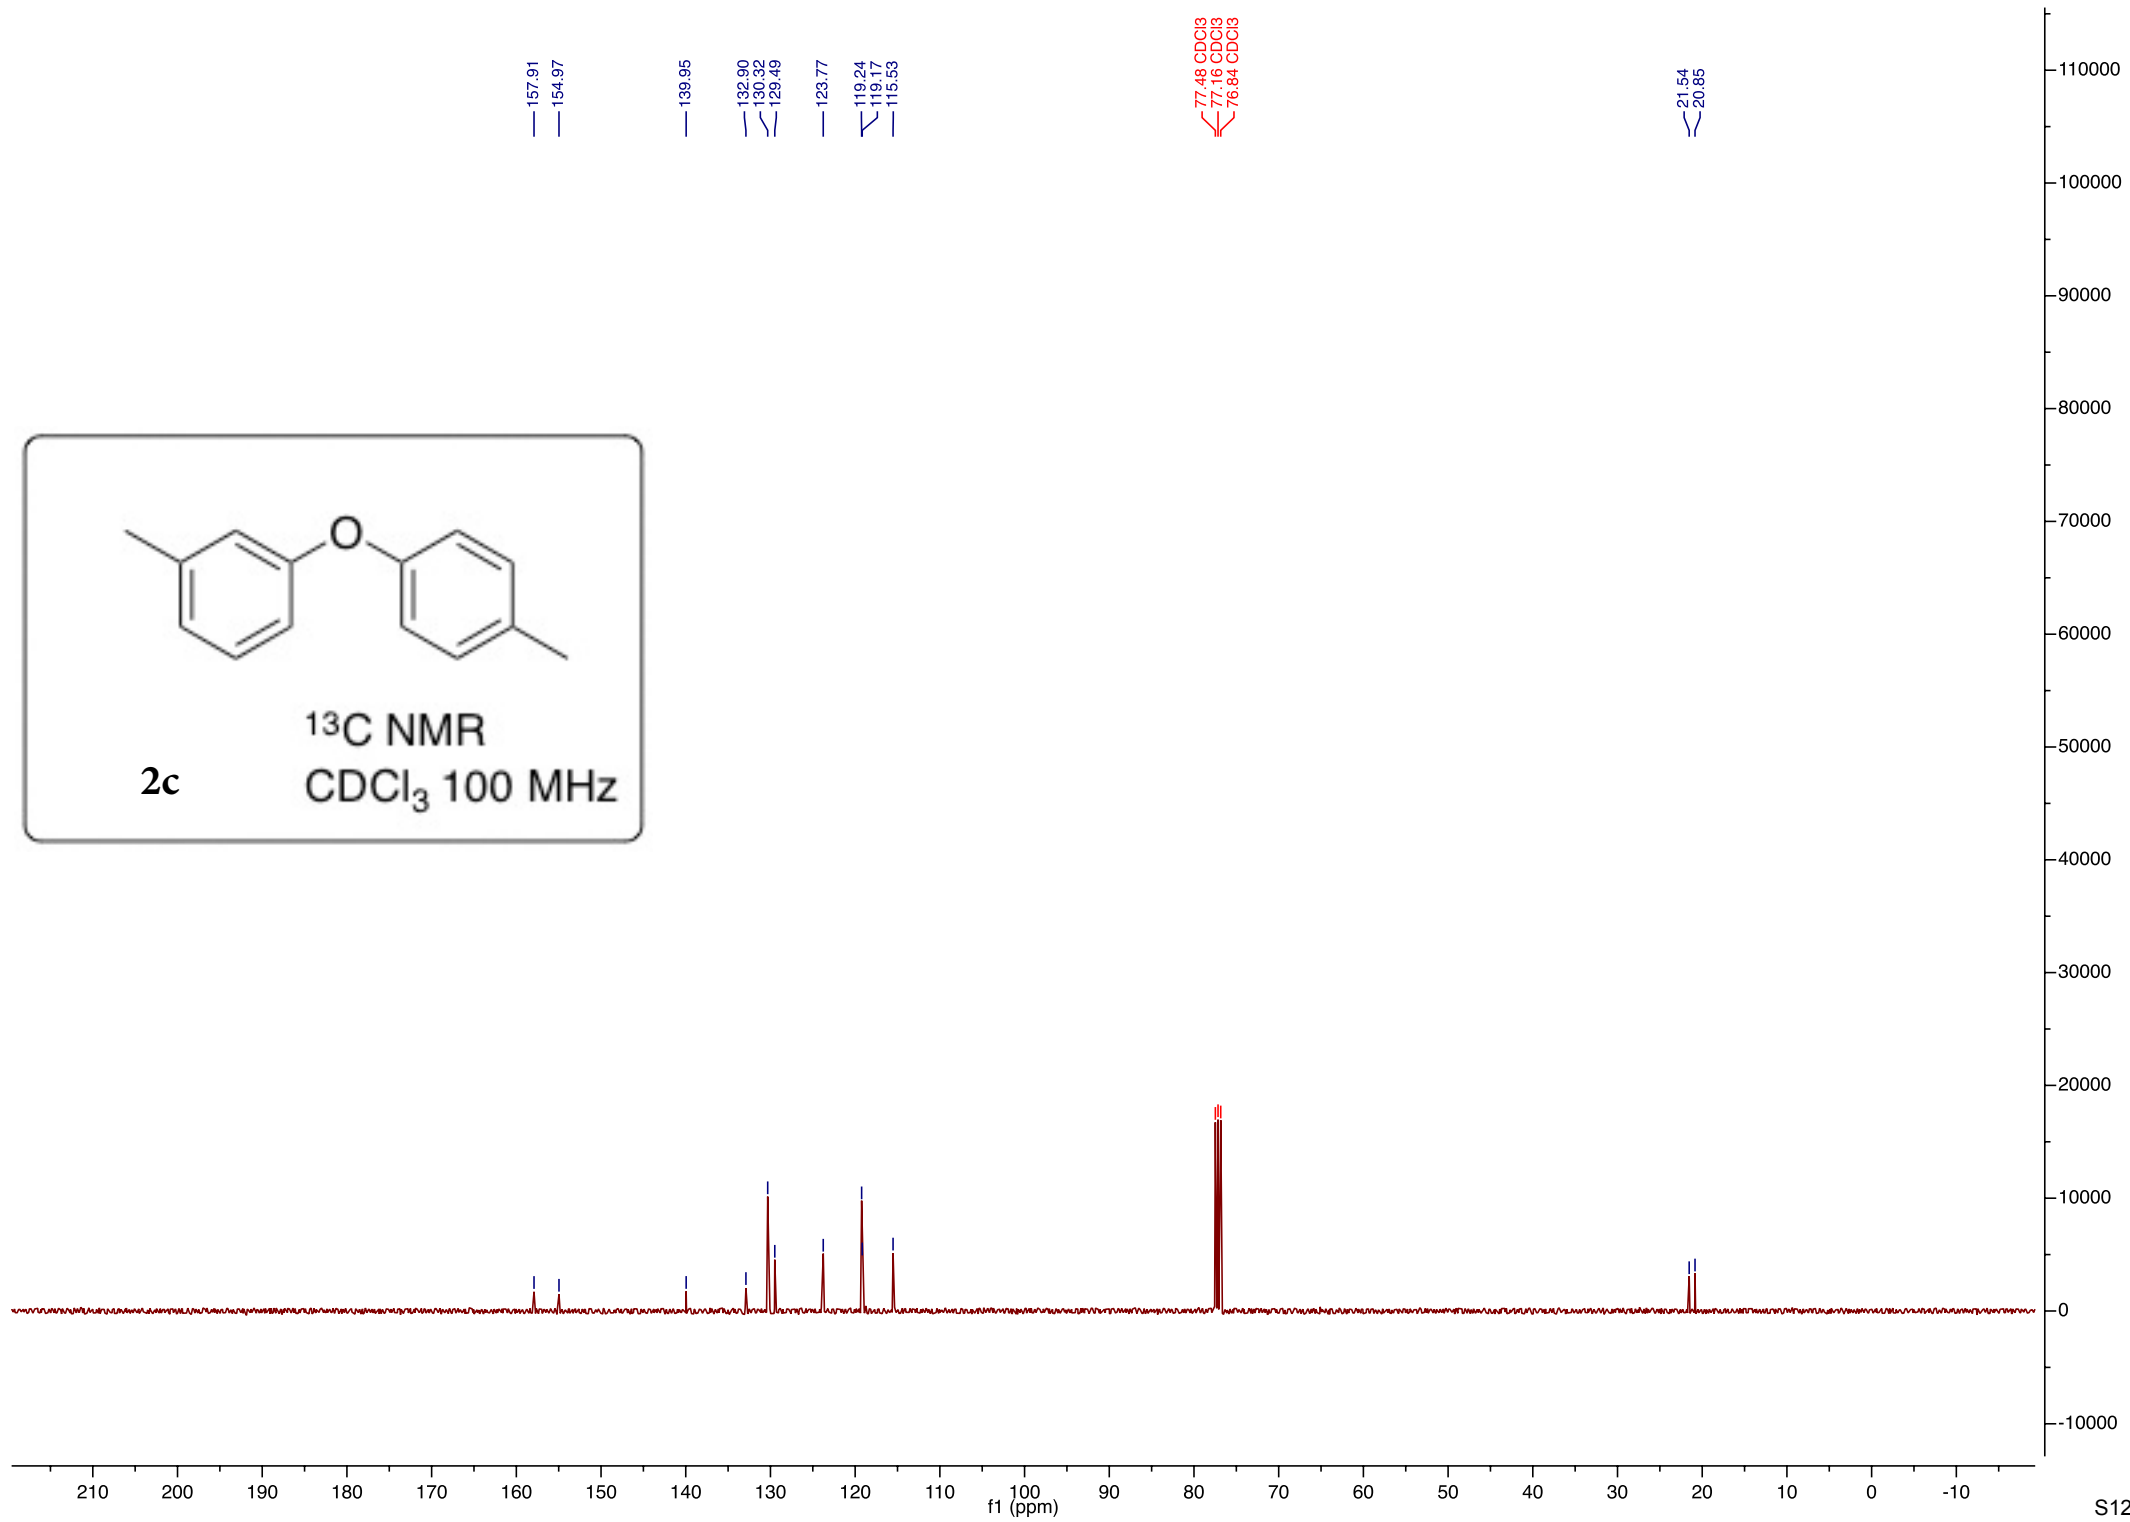

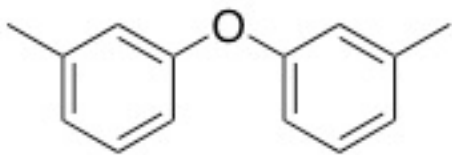

2d

<sup>1</sup>H NMR  
CDCl<sub>3</sub> 400 MHz

7.28 CDCl<sub>3</sub>  
7.27  
7.26  
7.25  
7.23  
6.97  
6.96  
6.96  
6.96  
6.95  
6.95  
6.94  
6.94  
6.88  
6.88  
6.87  
6.87  
6.87  
6.86  
6.86  
6.84  
6.84

2.37

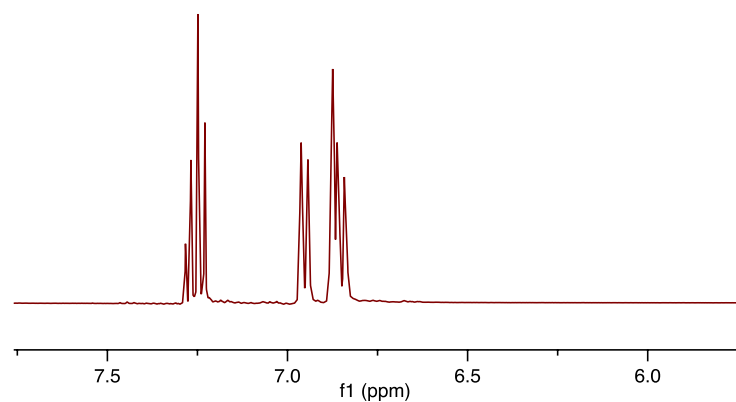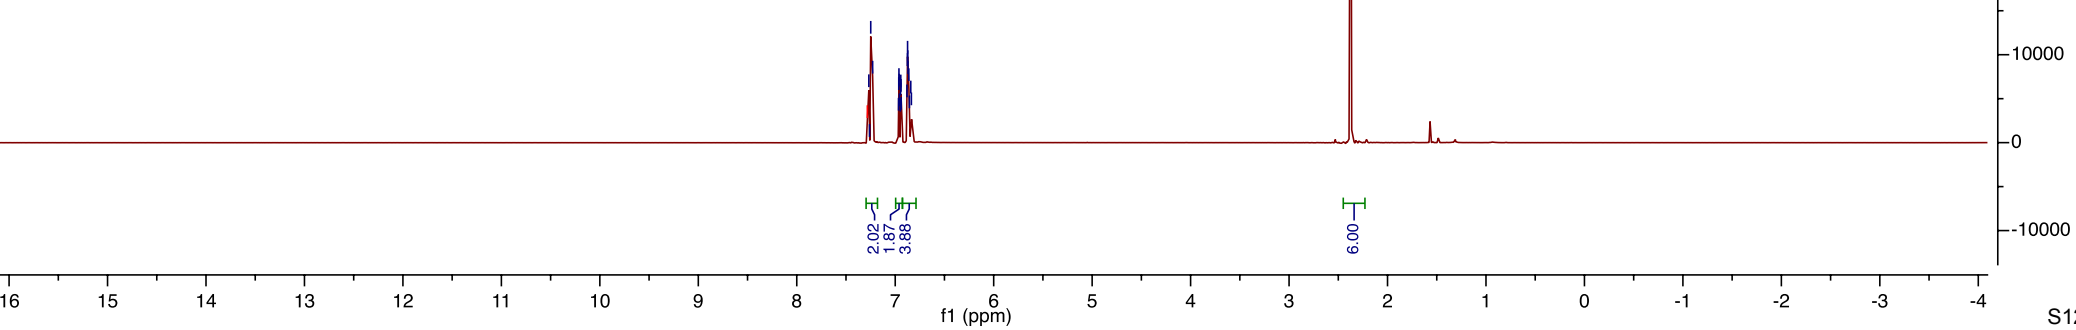

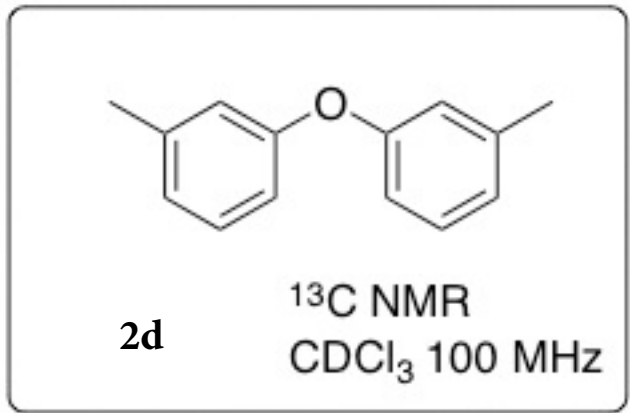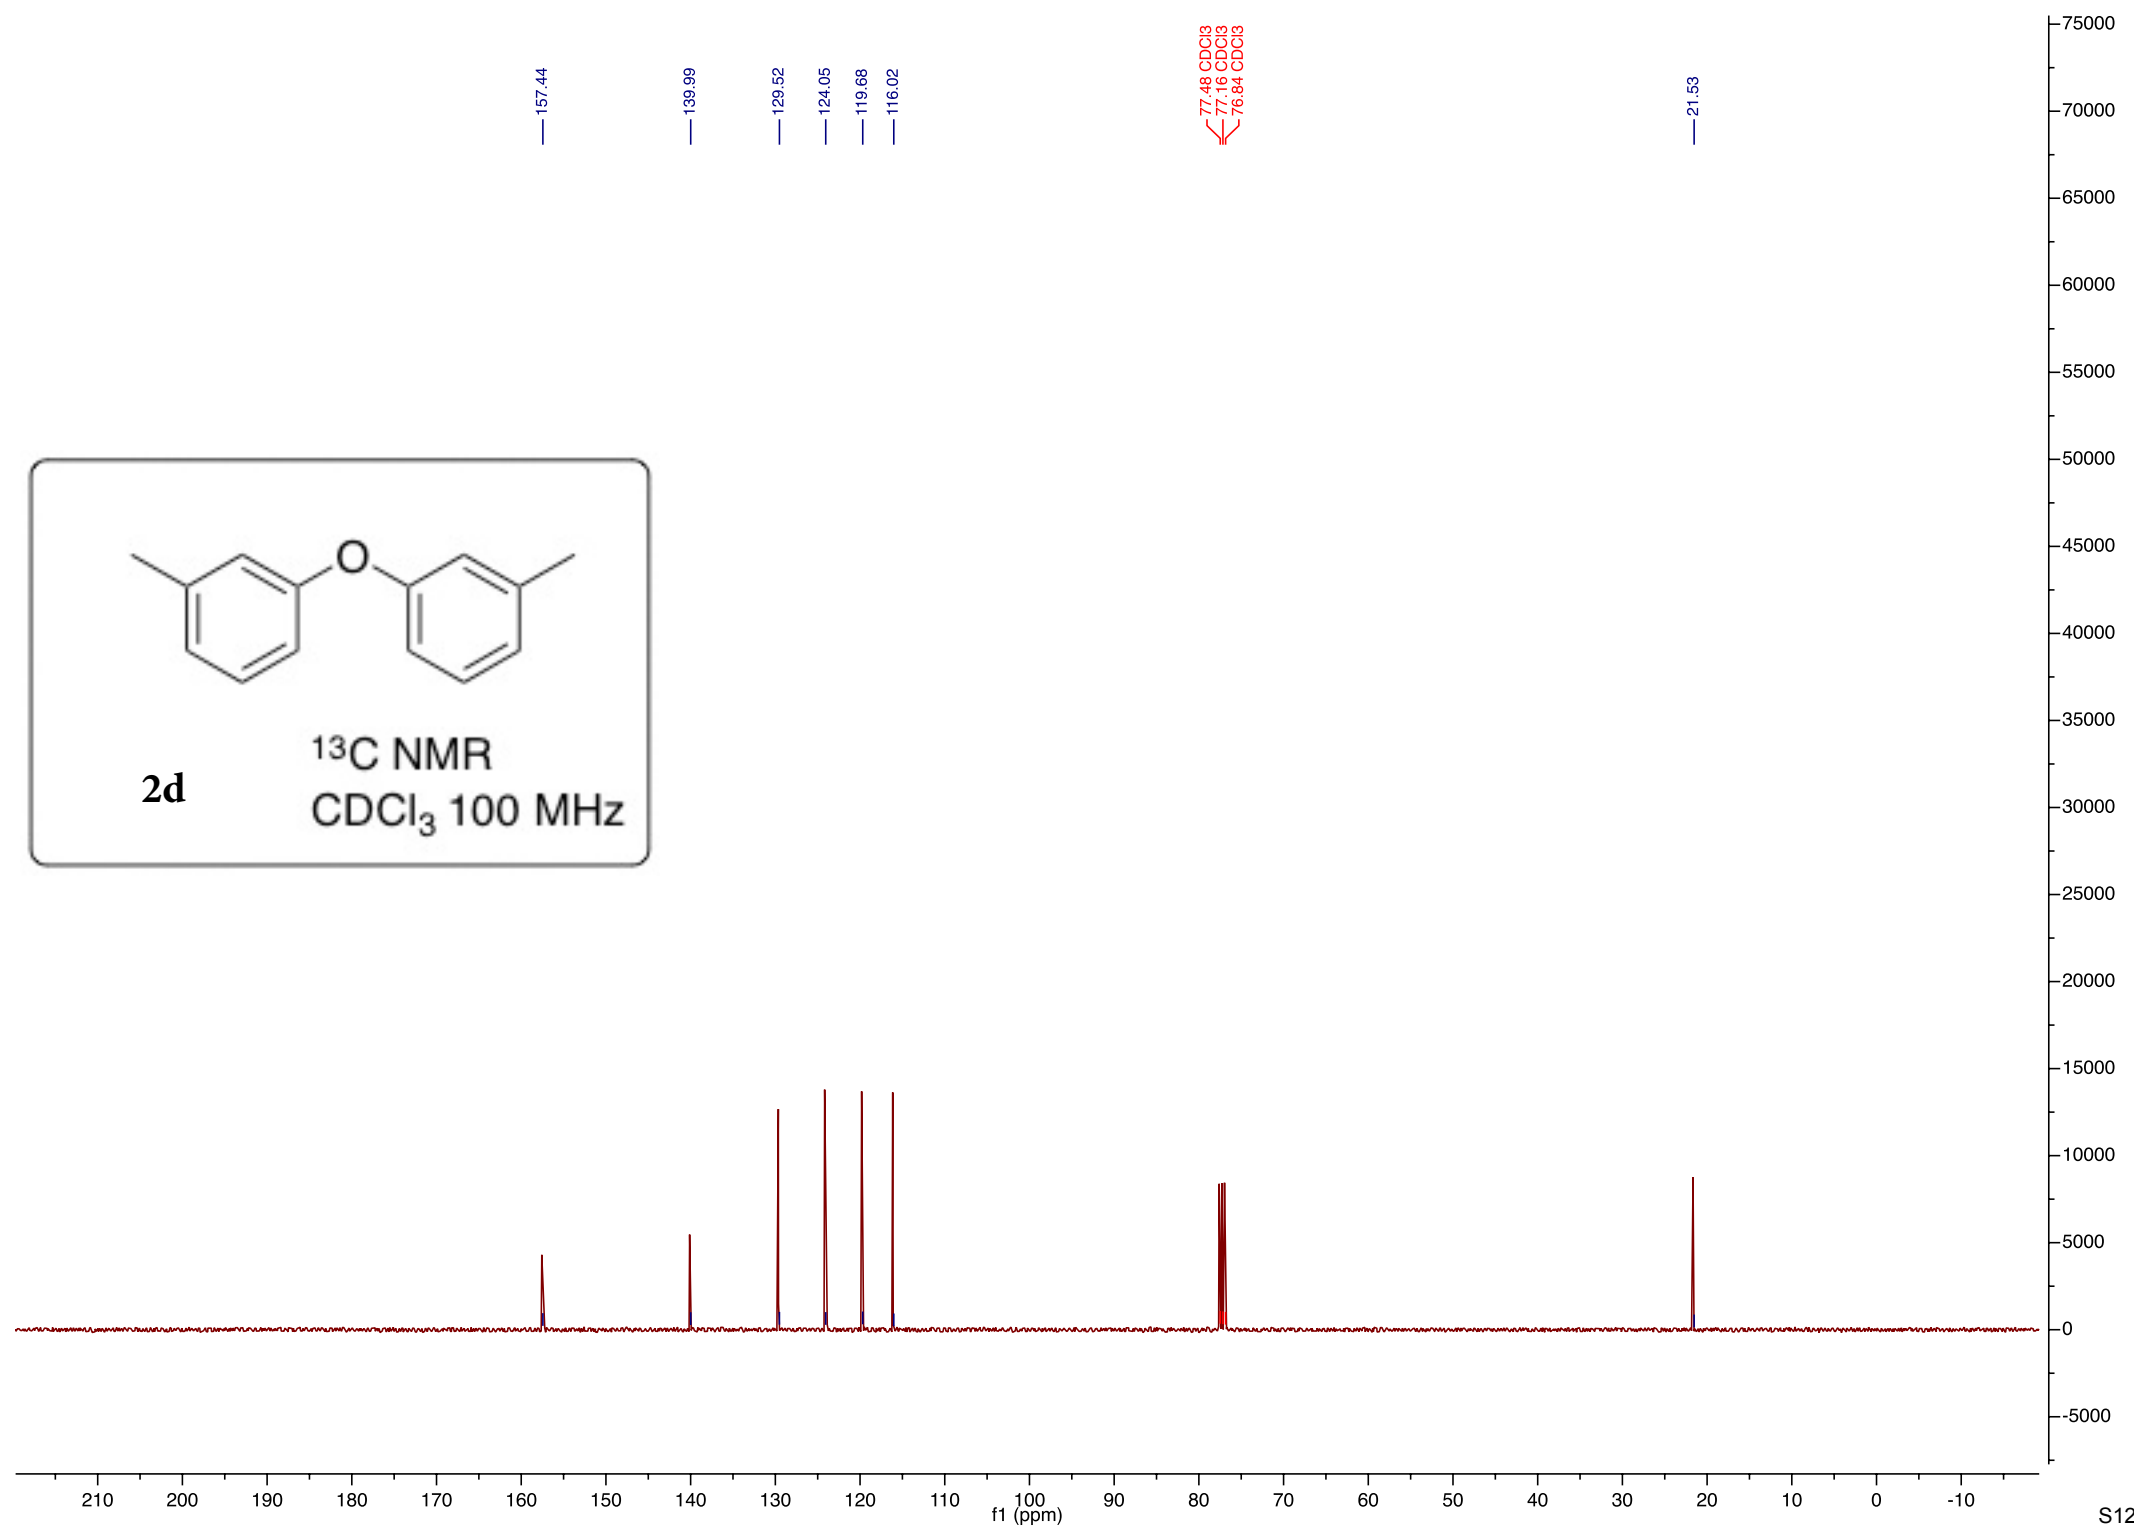

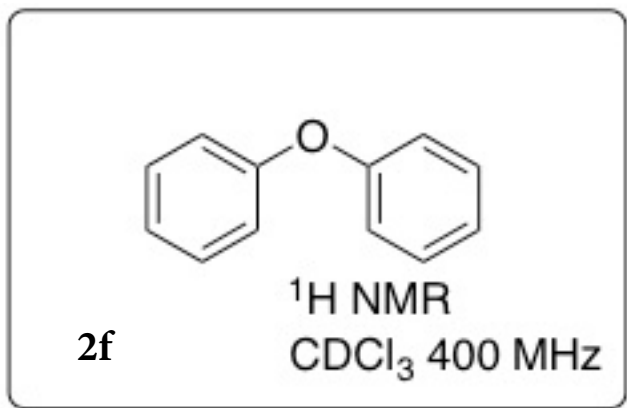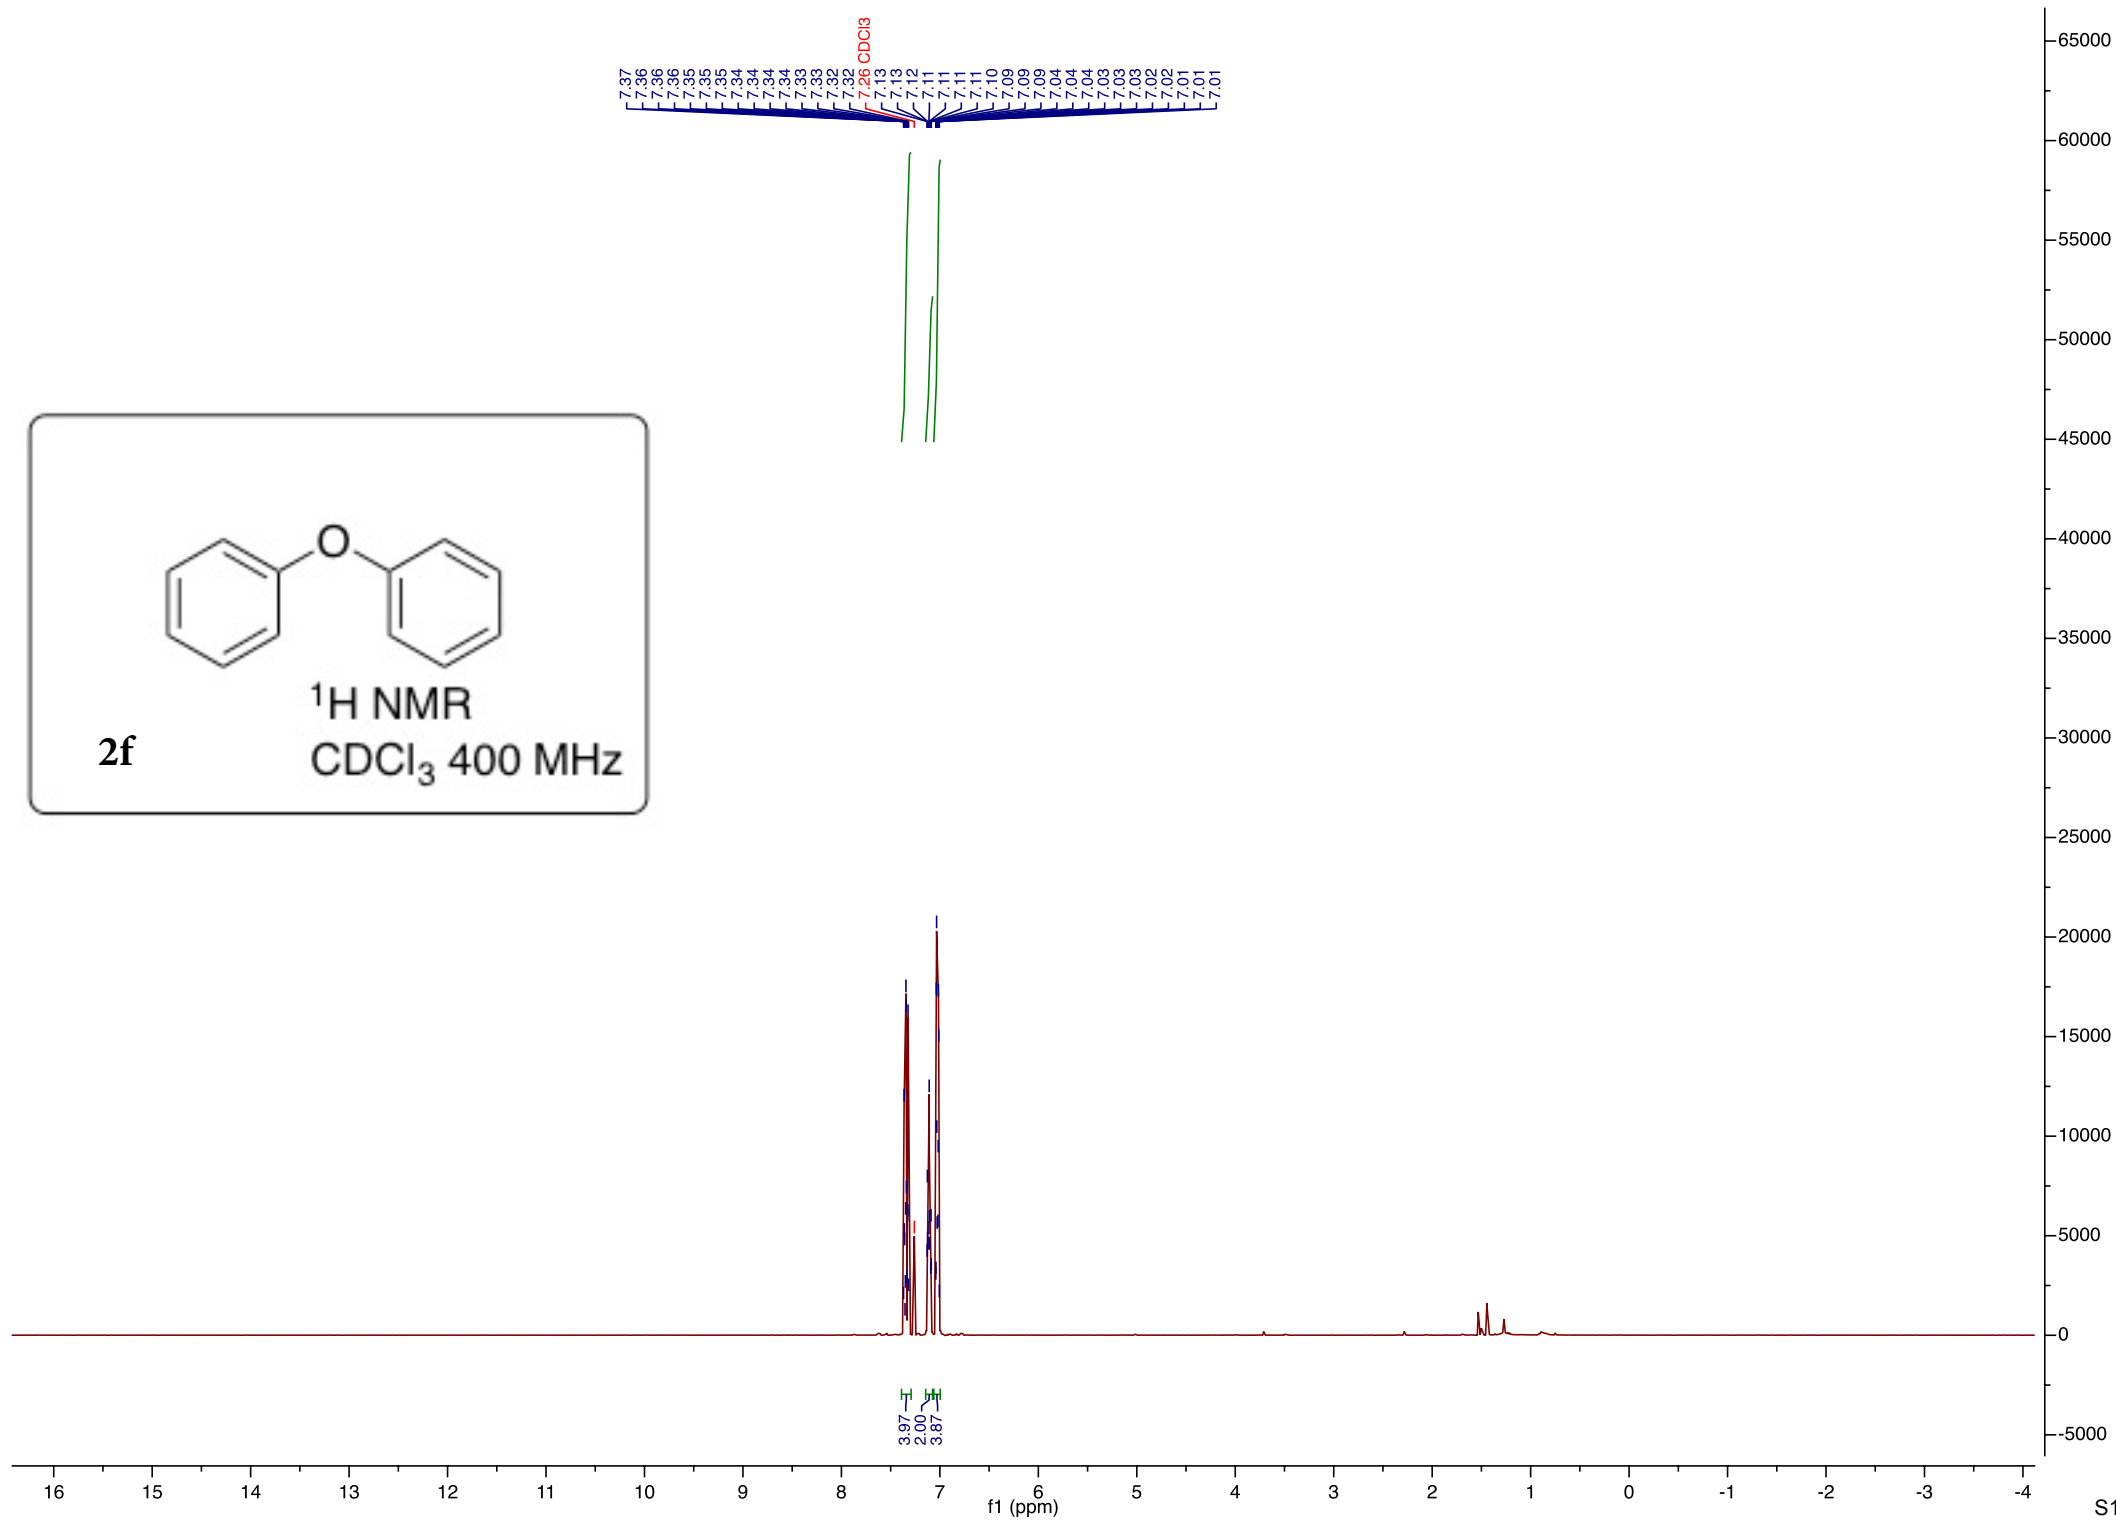



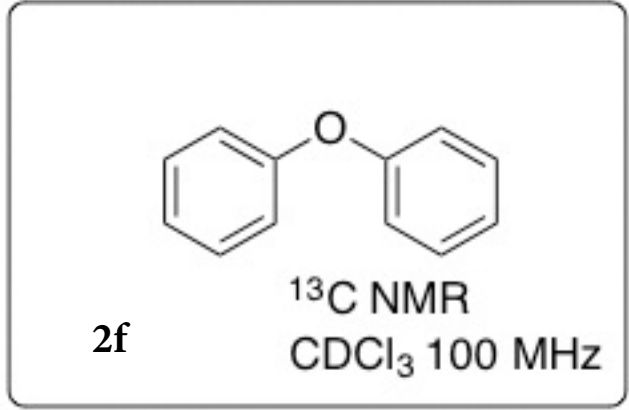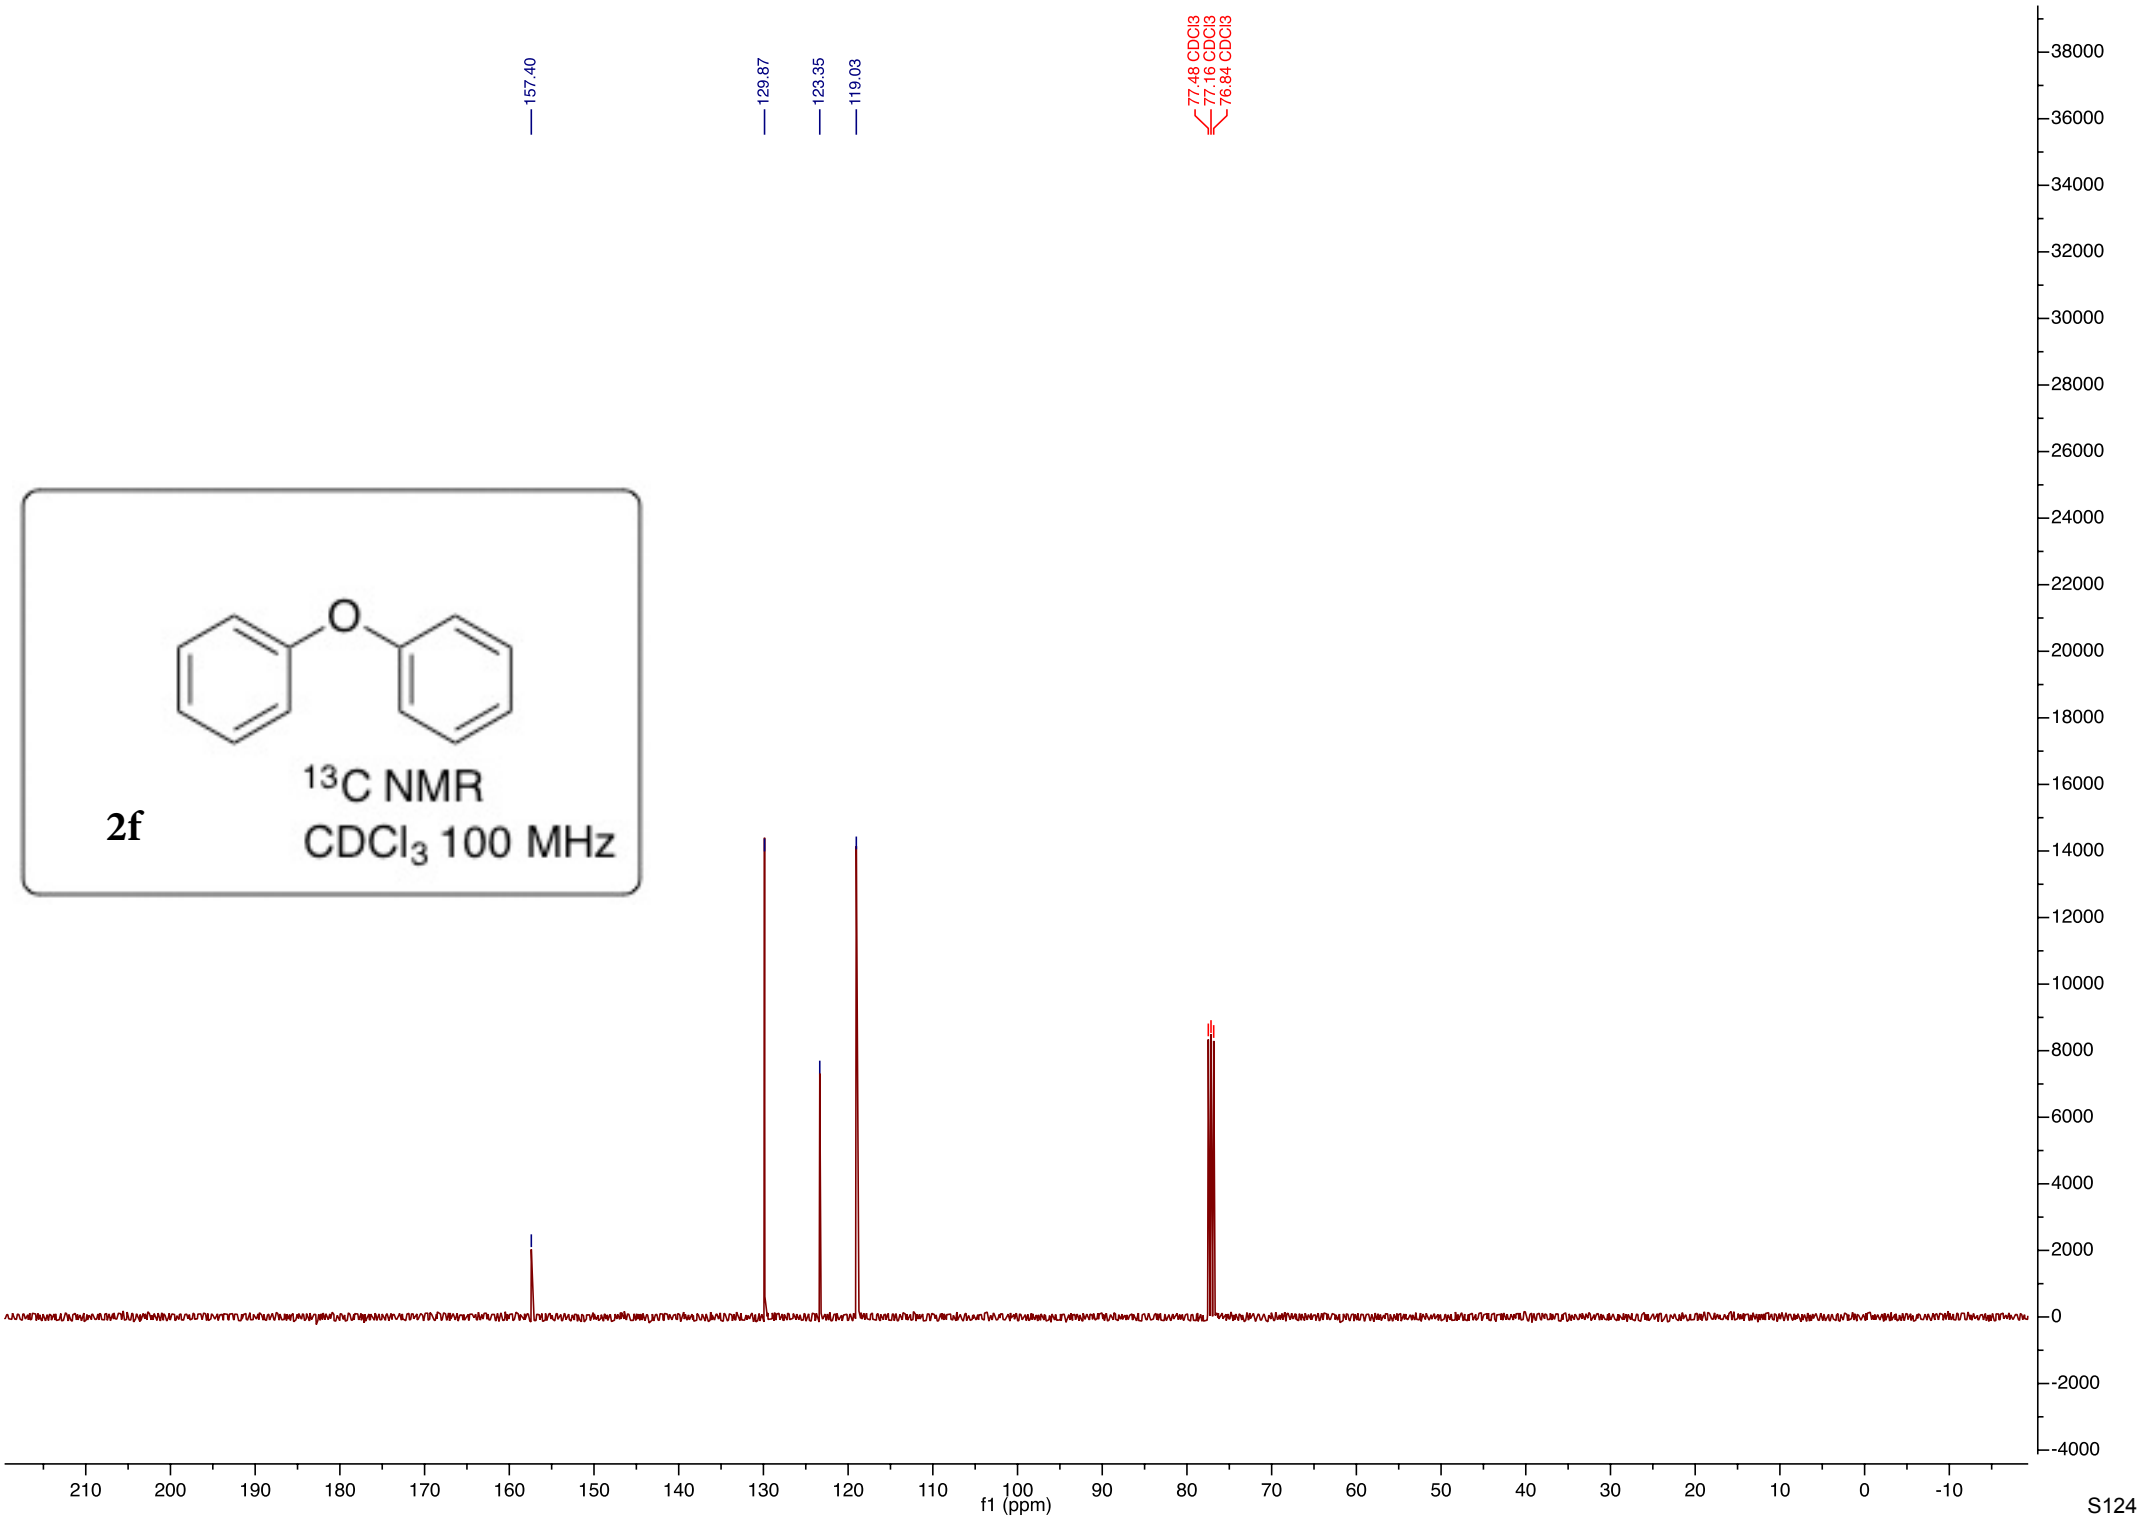

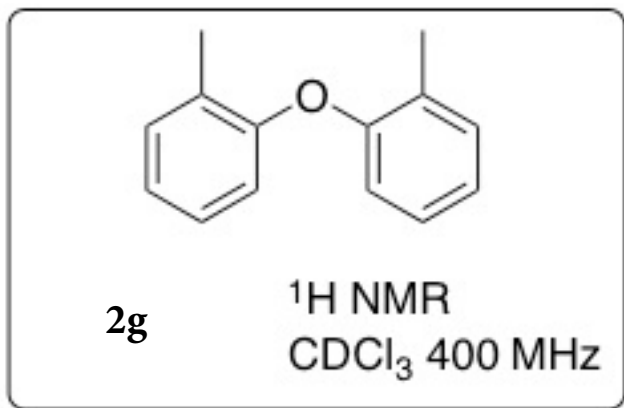

7.27 CDCl<sub>3</sub>  
7.26  
7.26  
7.25  
7.25  
7.24  
7.15  
7.14  
7.13  
7.13  
7.12  
7.12  
7.11  
7.11  
7.04  
7.02  
7.02  
7.00  
7.00  
6.75  
6.74  
6.73

2.30

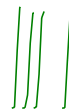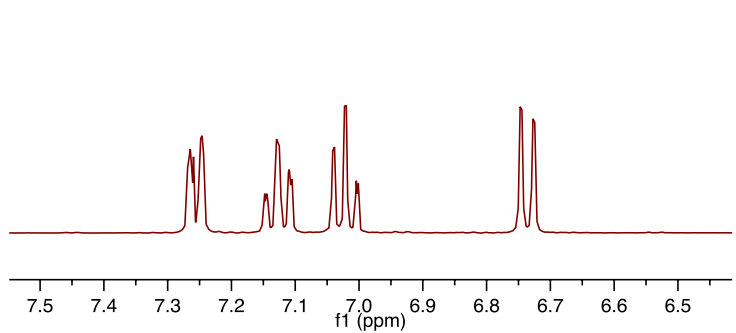

2.10  
1.98  
2.00  
1.96

6.00

16 15 14 13 12 11 10 9 8 7 6 5 4 3 2 1 0 -1 -2 -3 -4

f1 (ppm)

220000  
210000  
200000  
190000  
180000  
170000  
160000  
150000  
140000  
130000  
120000  
110000  
100000  
90000  
80000  
70000  
60000  
50000  
40000  
30000  
20000  
10000  
0  
-10000  
-20000

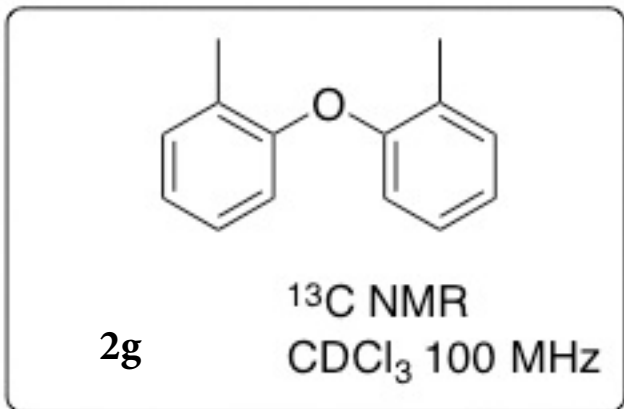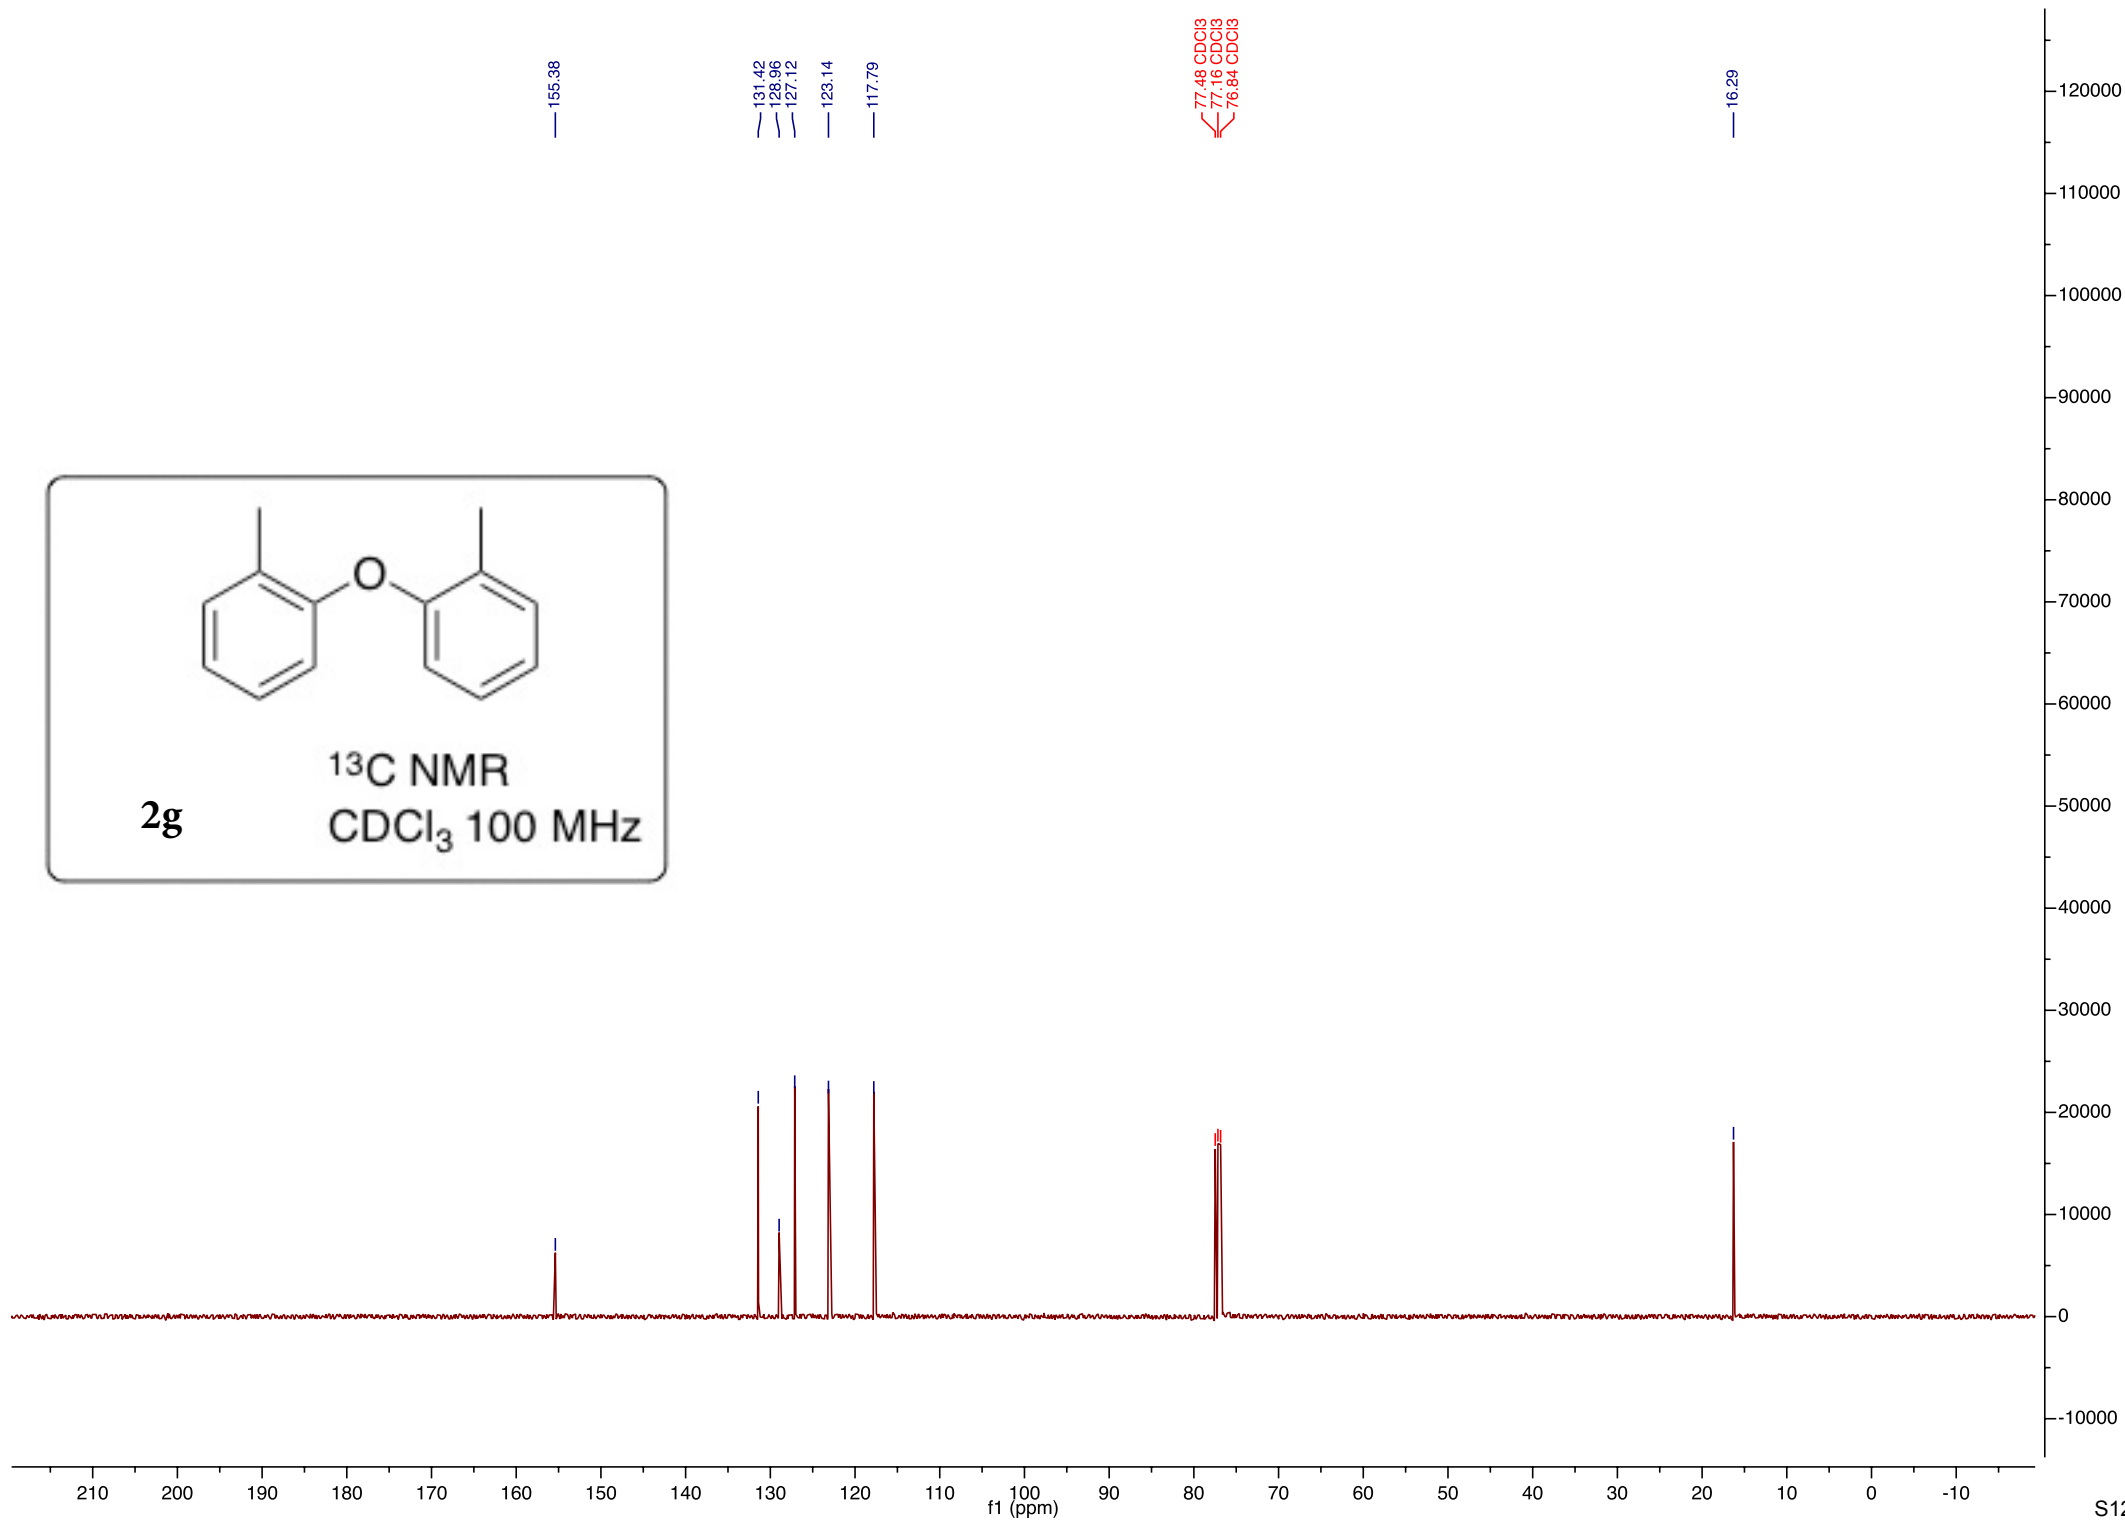

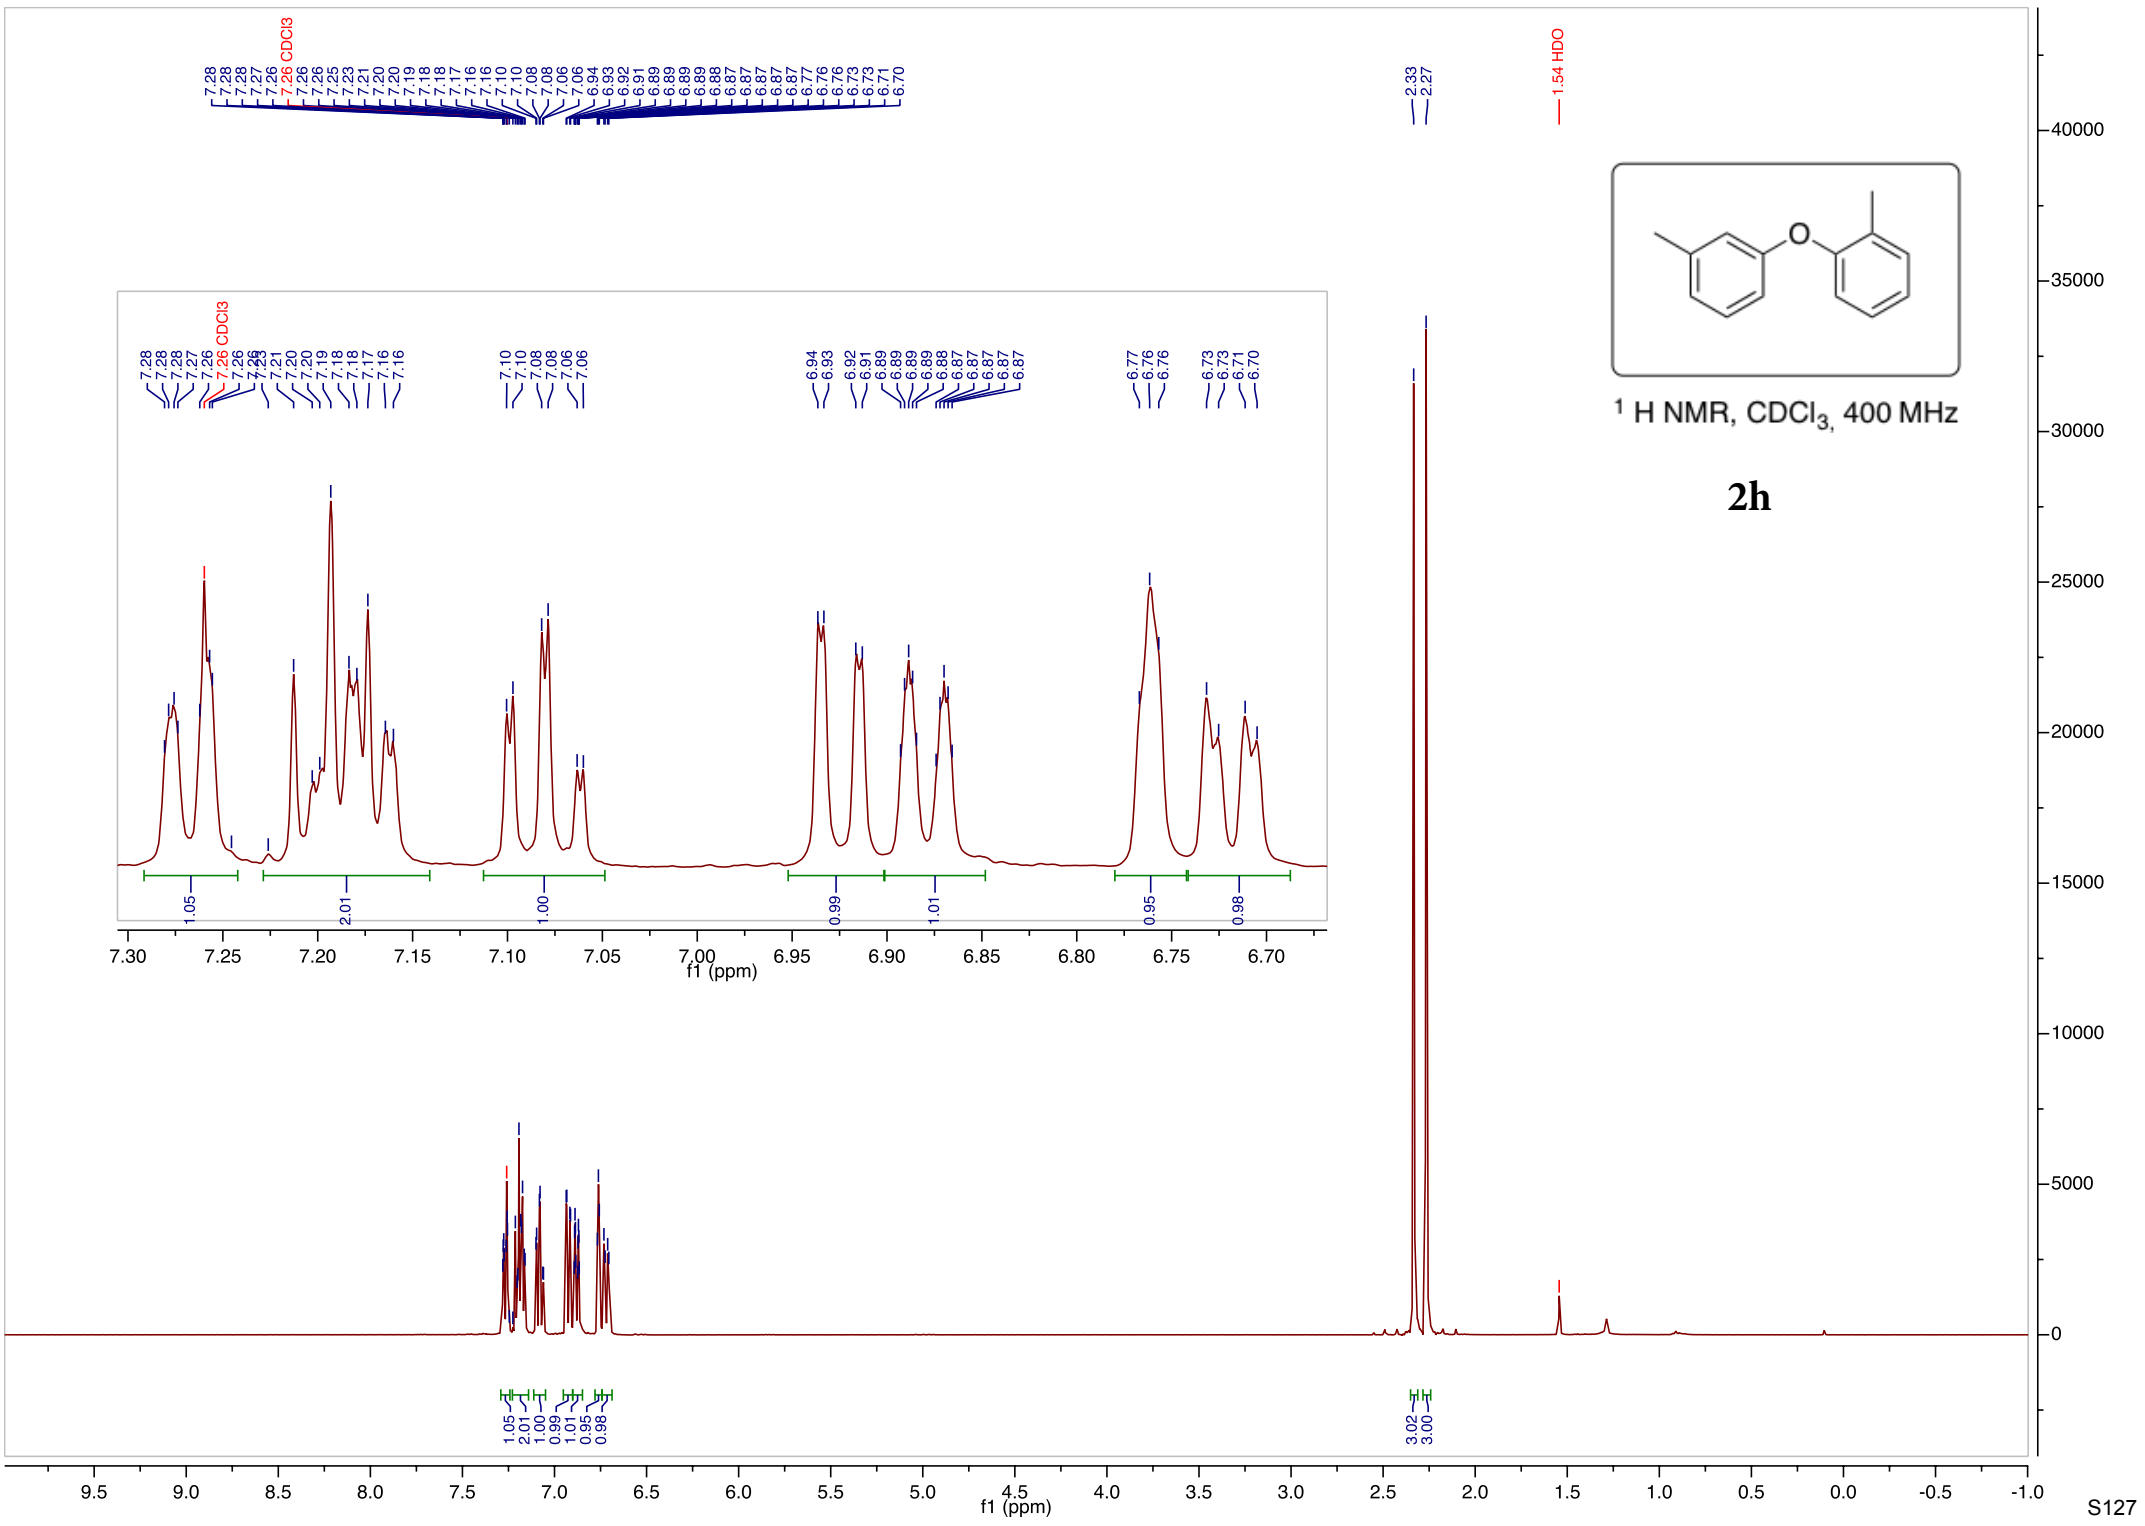

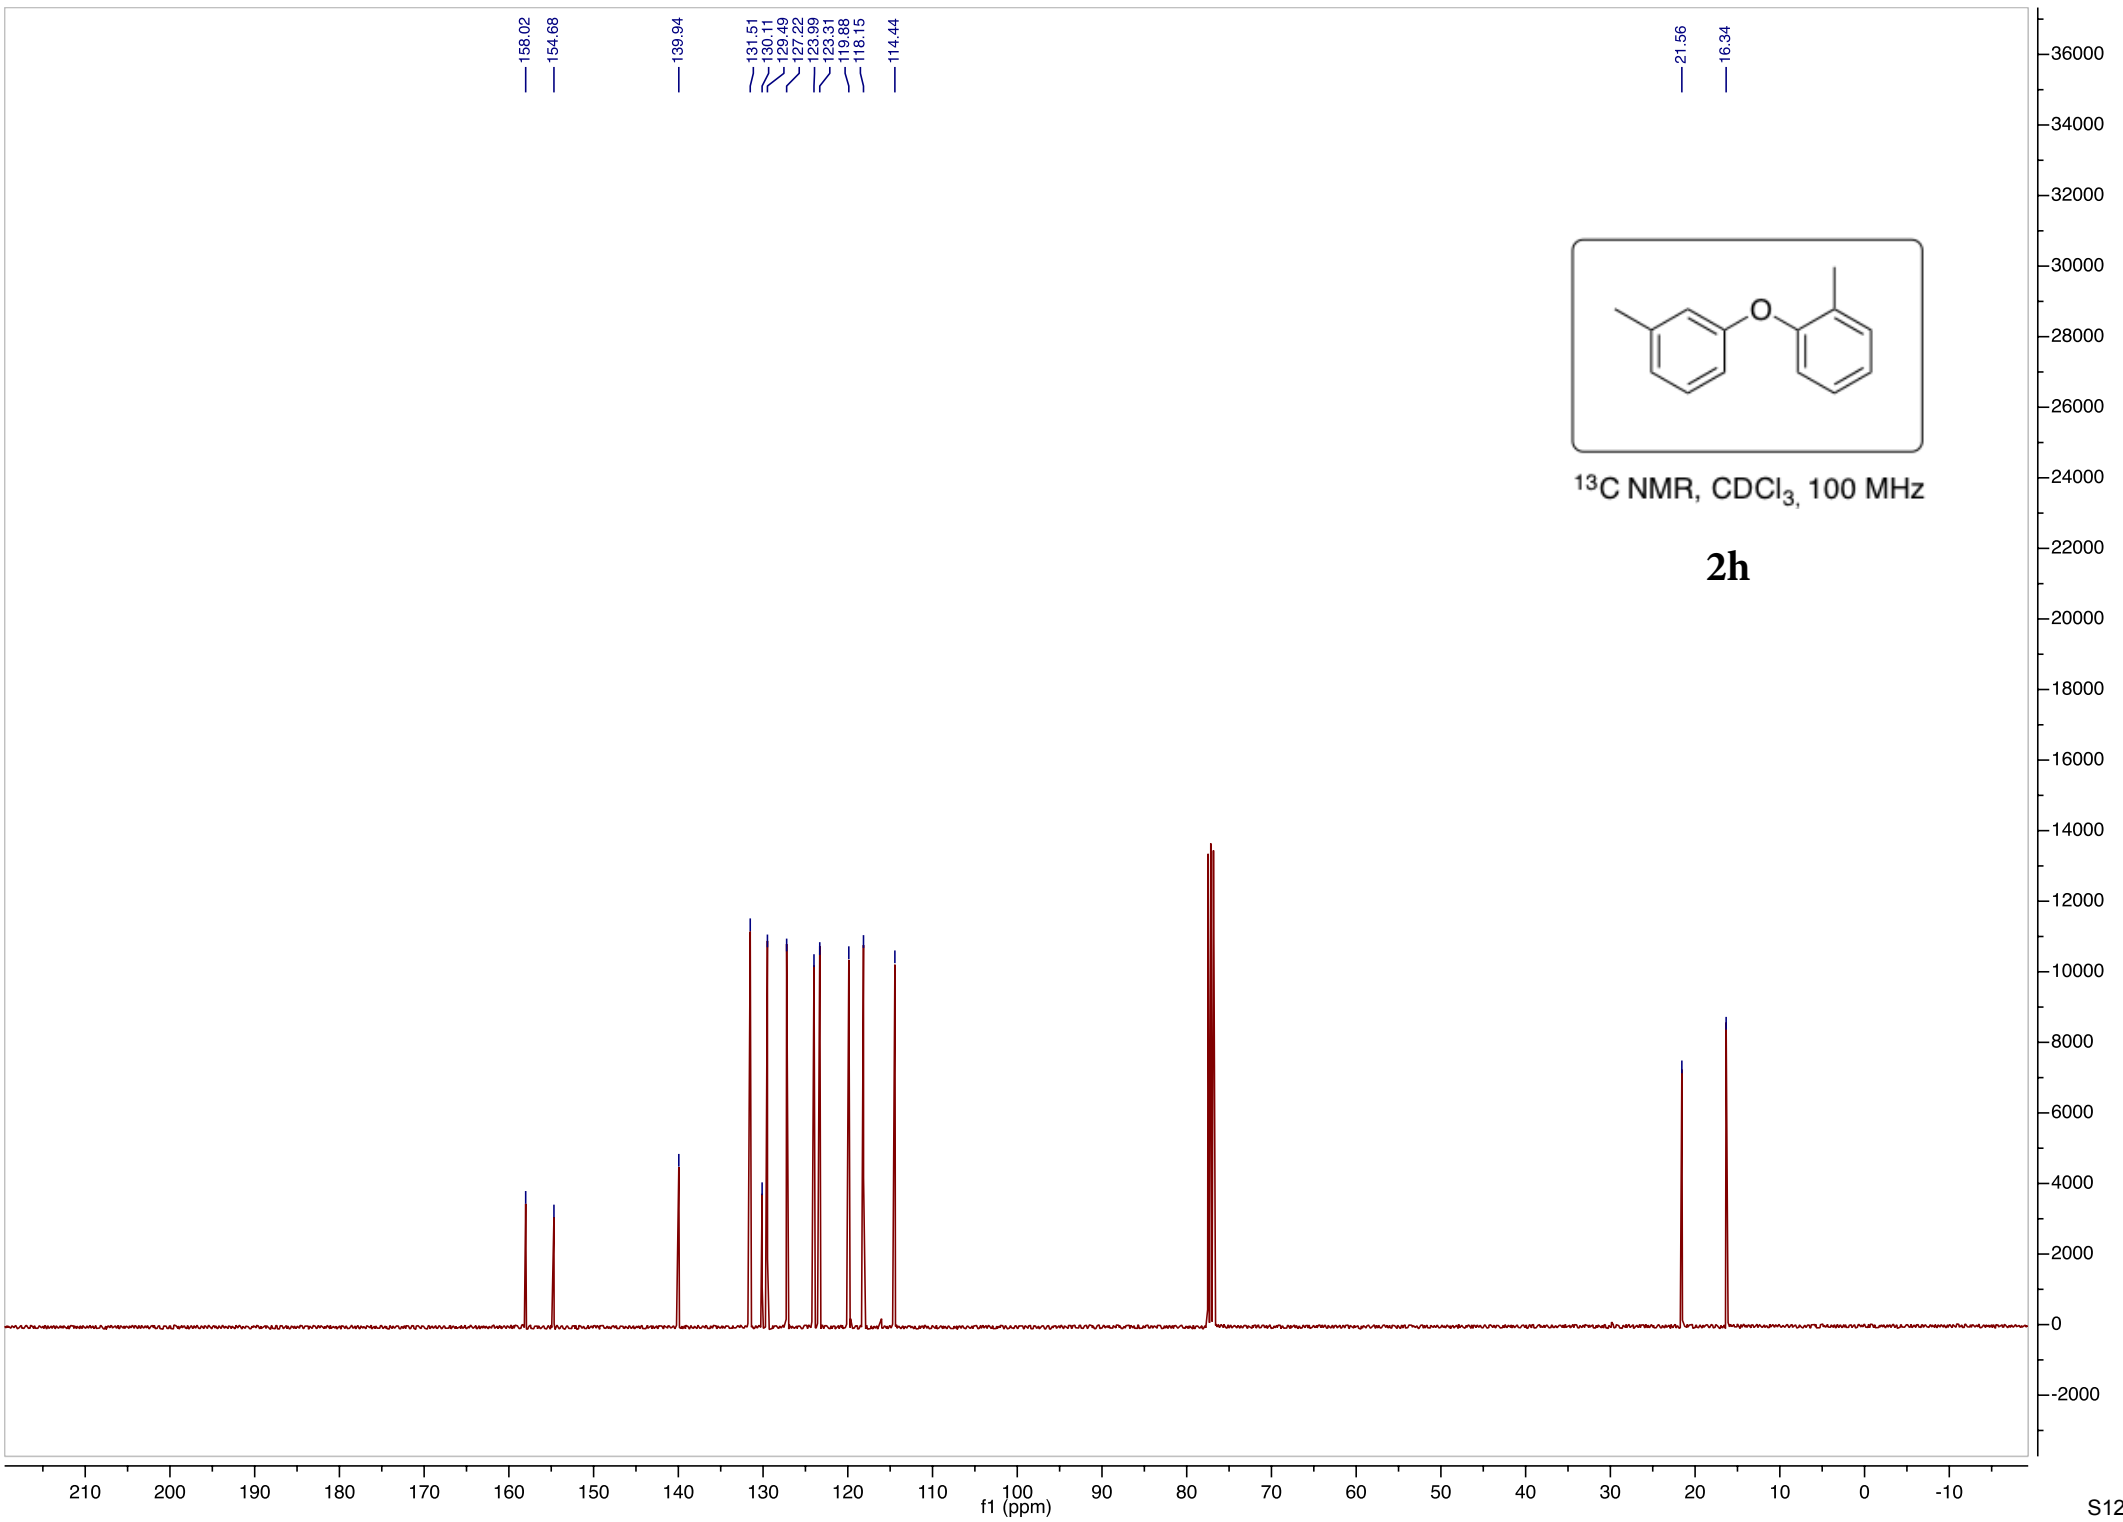

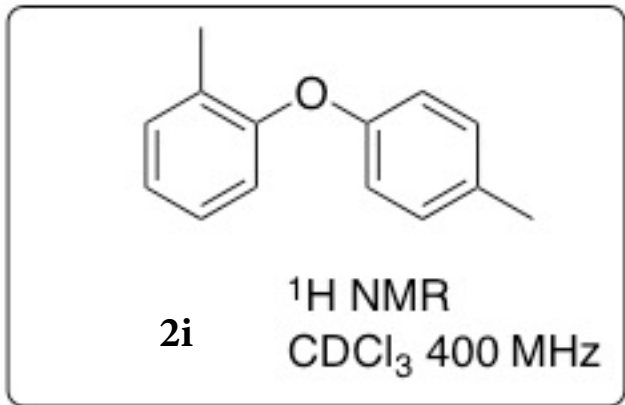

7.26 CDCl<sub>3</sub>  
7.25  
7.25  
7.25  
7.23  
7.23  
7.23  
7.17  
7.16  
7.15  
7.14  
7.14  
7.13  
7.12  
7.11  
7.11  
7.11  
7.10  
7.09  
7.09  
7.09  
7.08  
7.06  
7.04  
7.02  
7.02  
6.88  
6.88  
6.88  
6.88  
6.87  
6.87  
6.87  
6.87  
6.81  
6.80  
6.79

2.32  
2.26

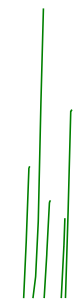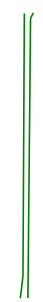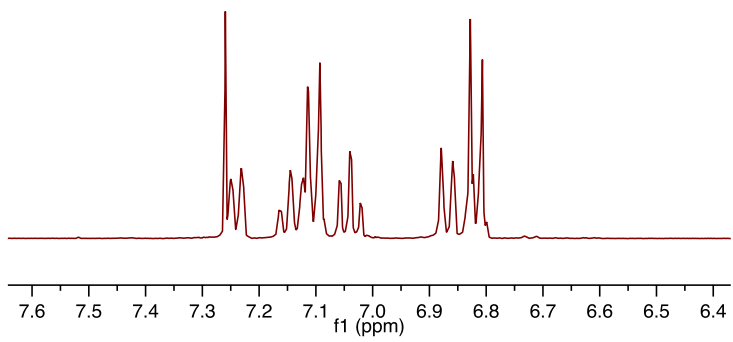

1.98  
3.05  
1.03  
0.84  
1.98

3.00  
3.00

16 15 14 13 12 11 10 9 8 7 6 5 4 3 2 1 0 -1 -2 -3 -4

f1 (ppm)

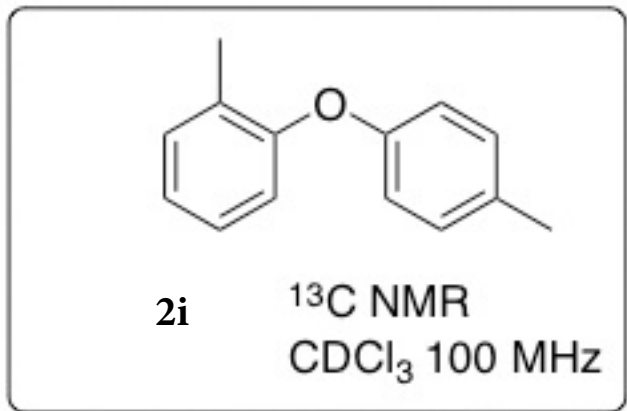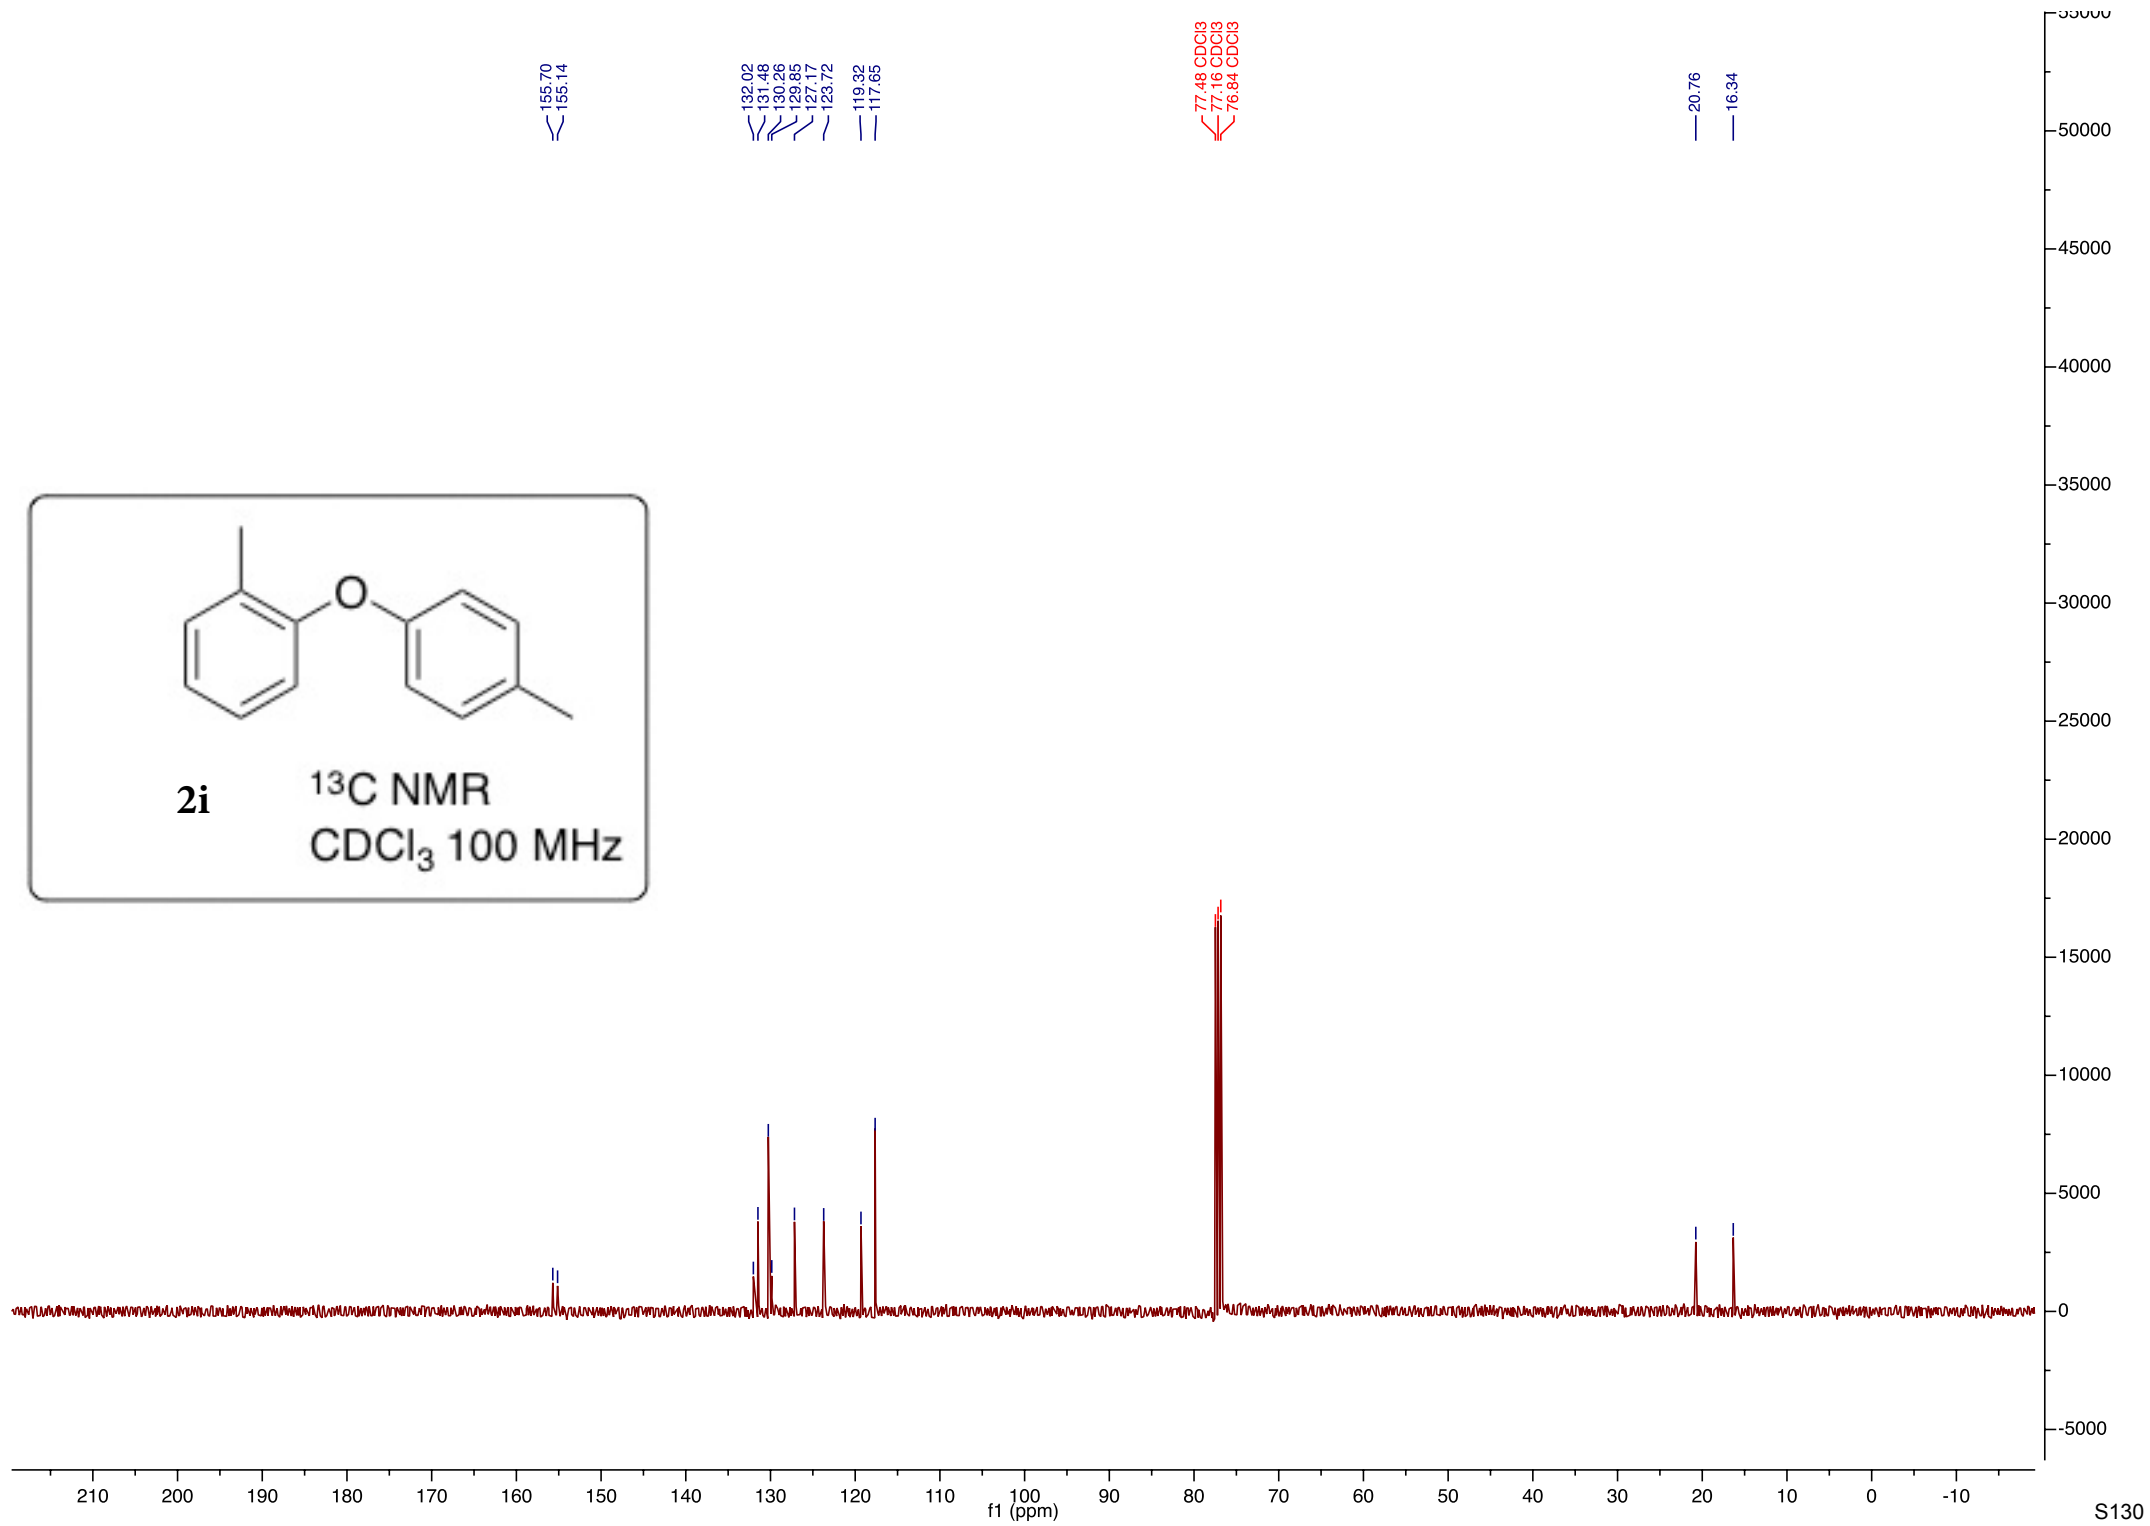

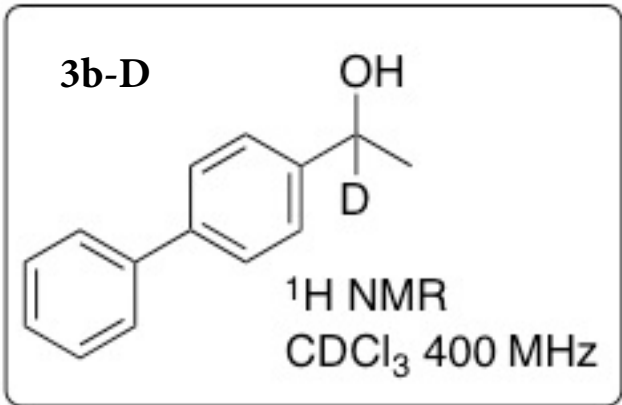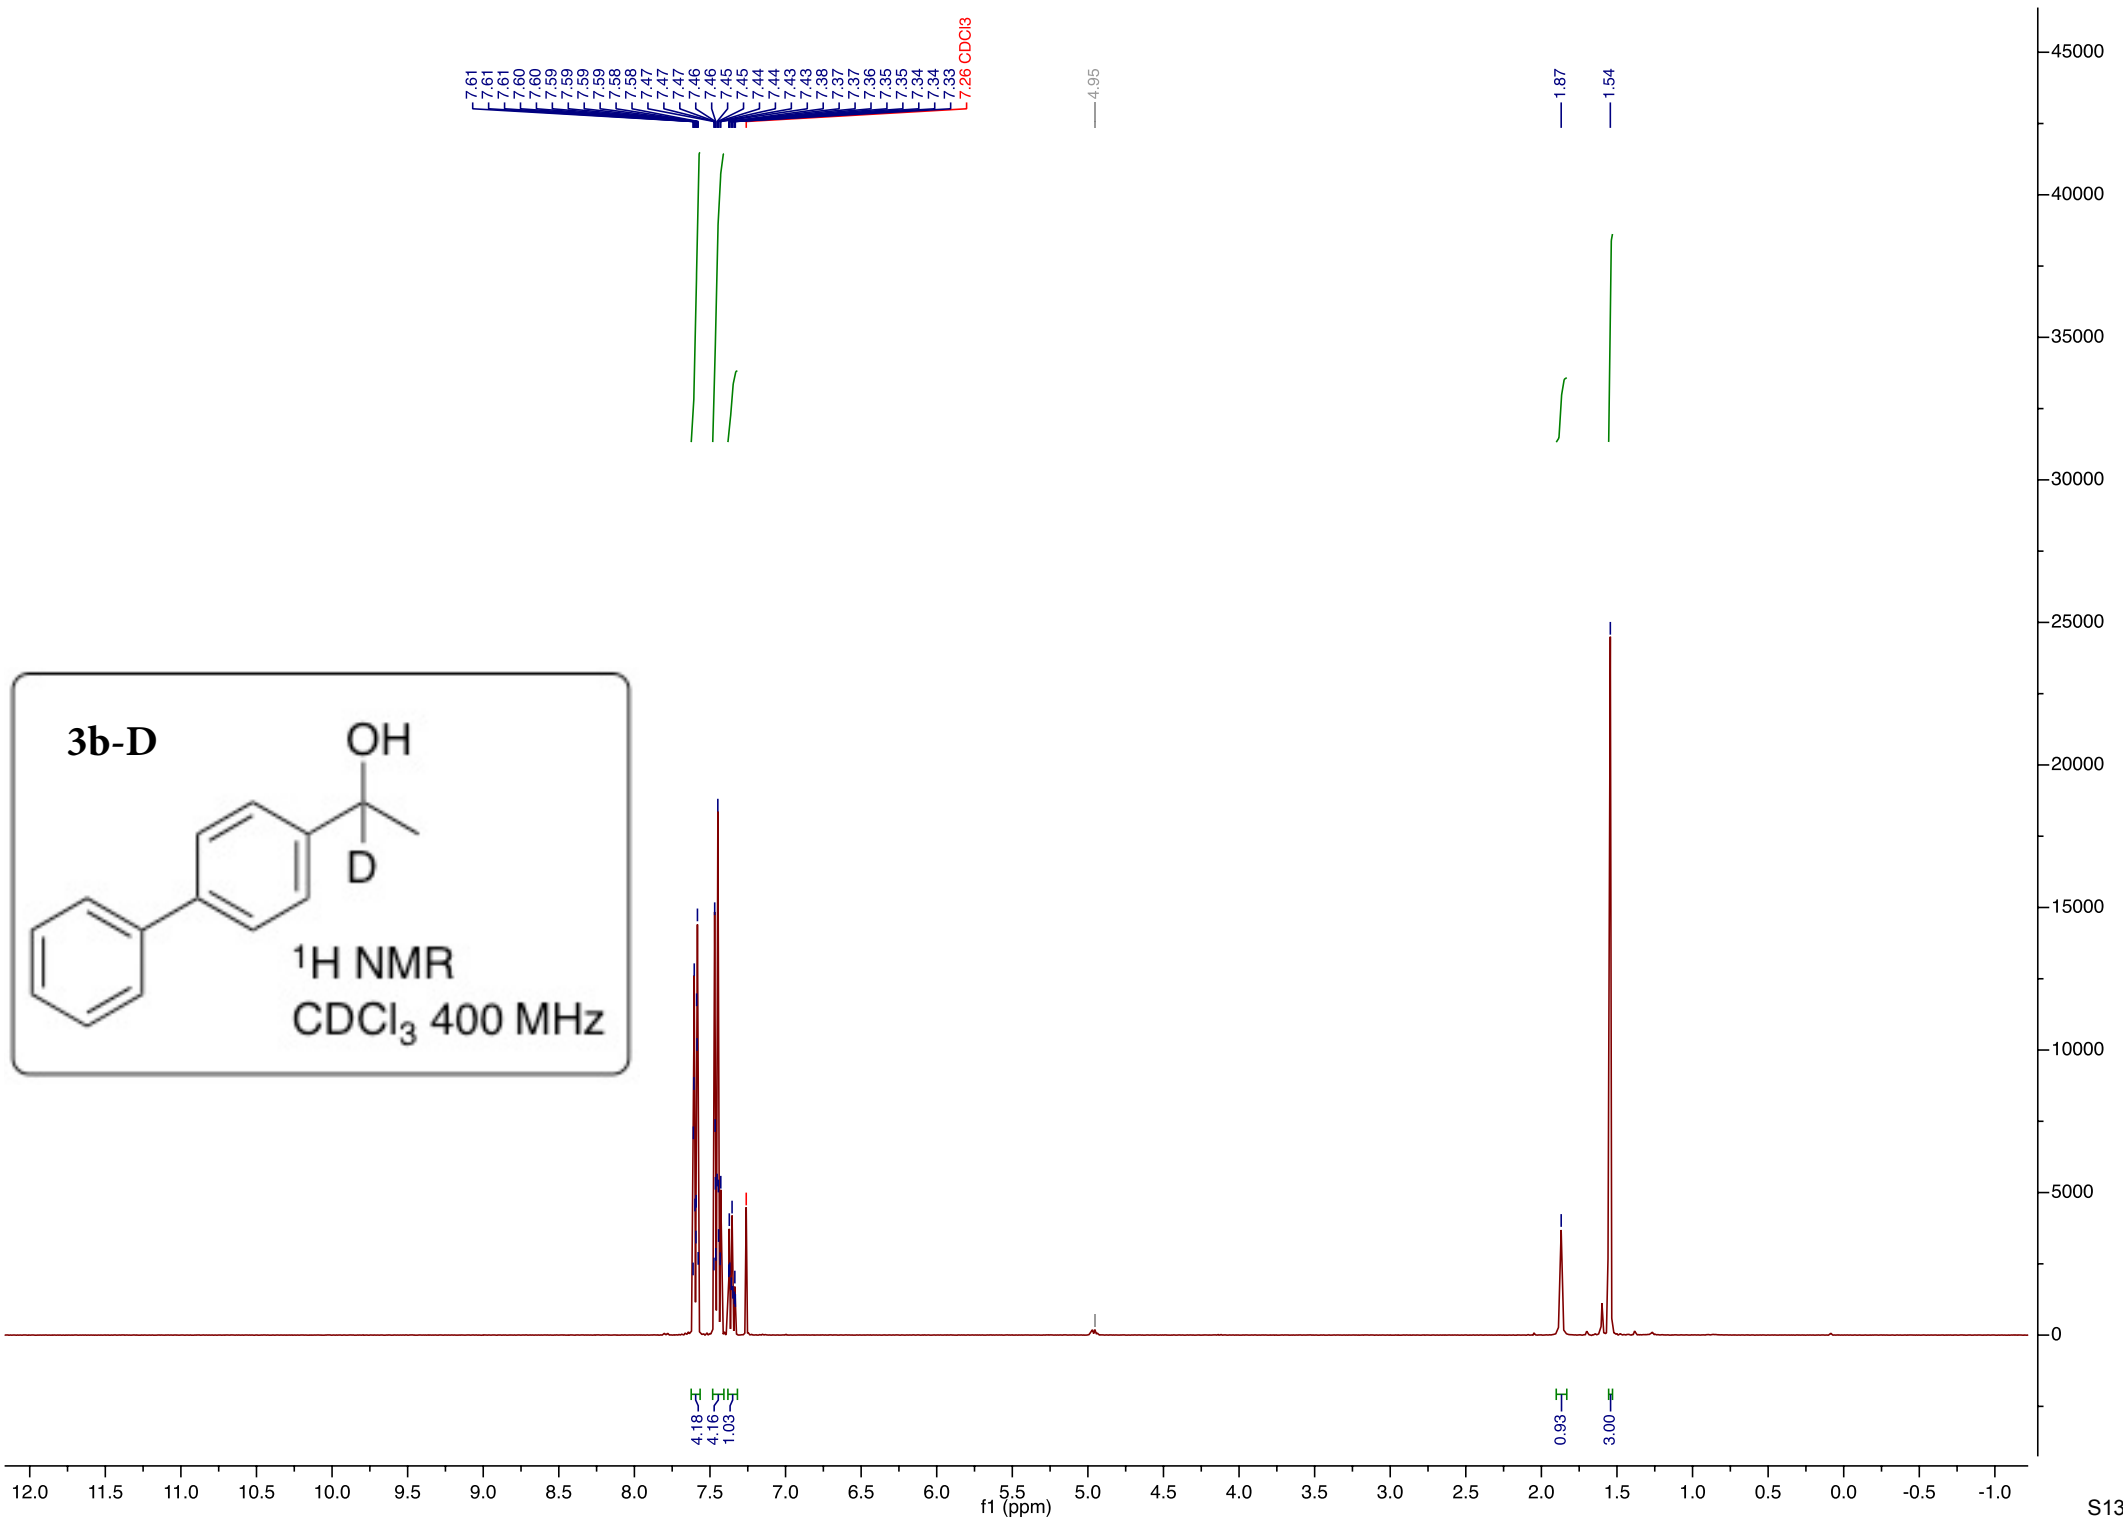



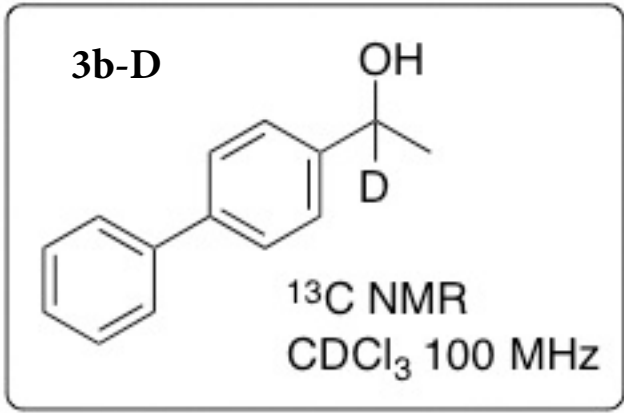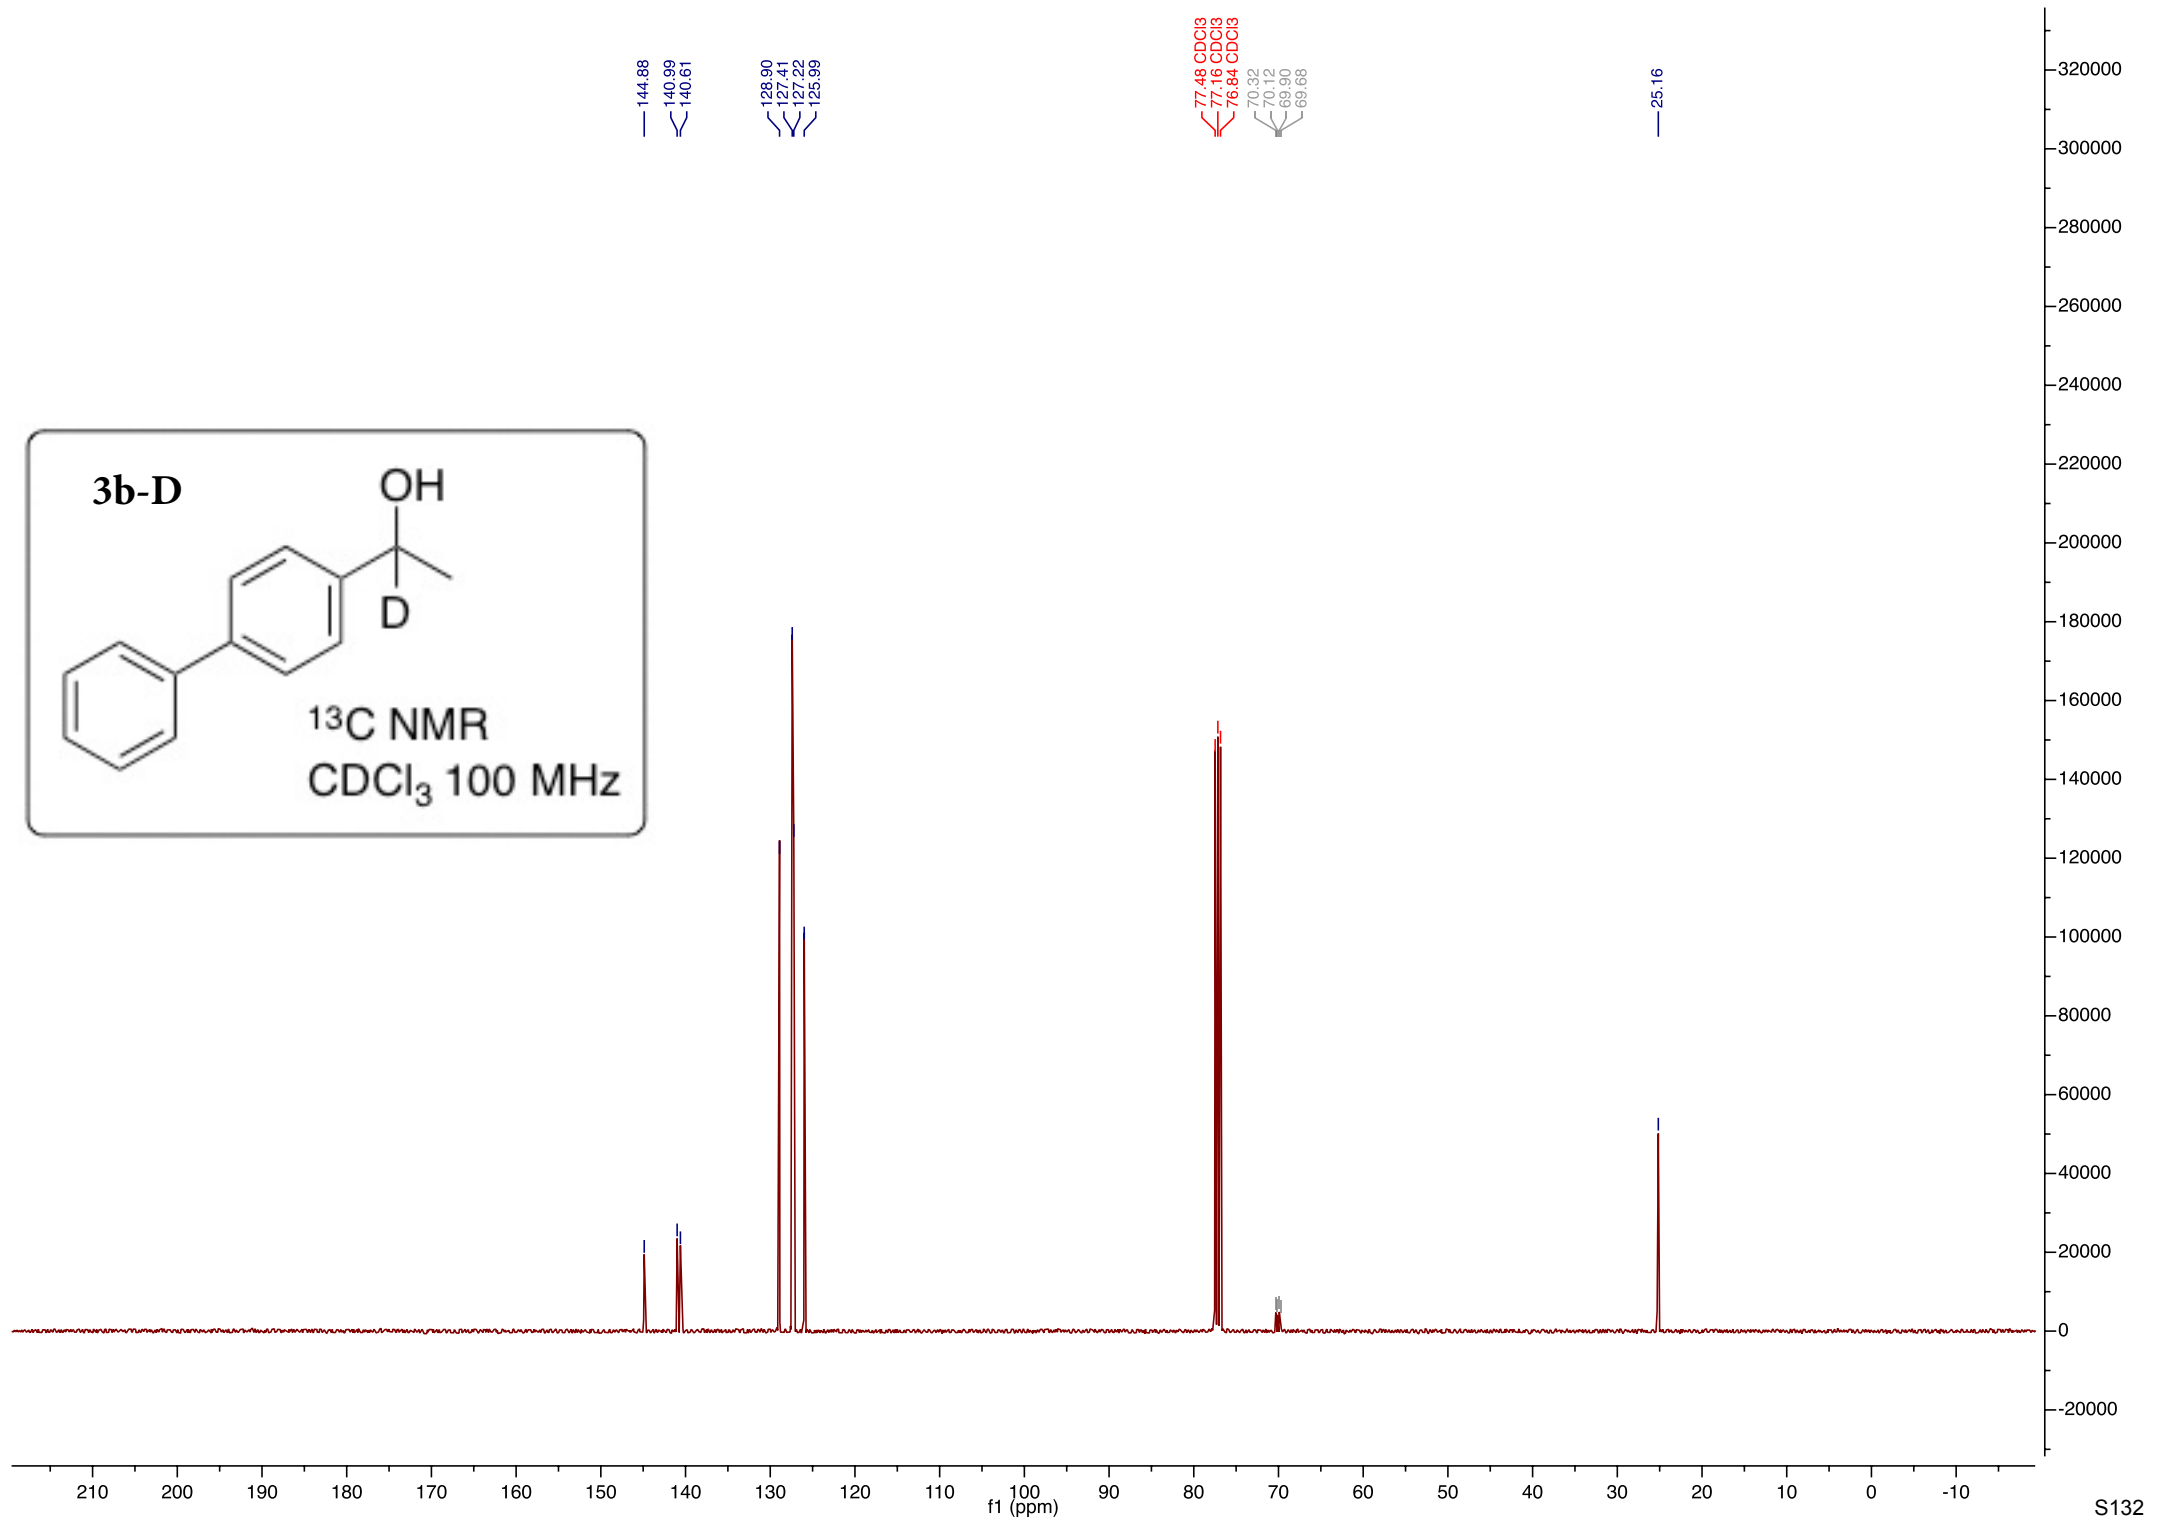

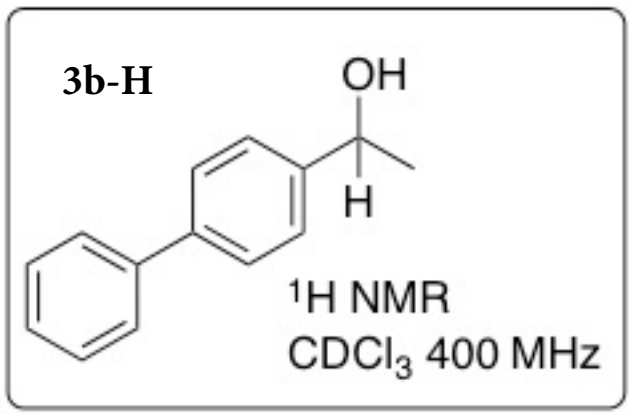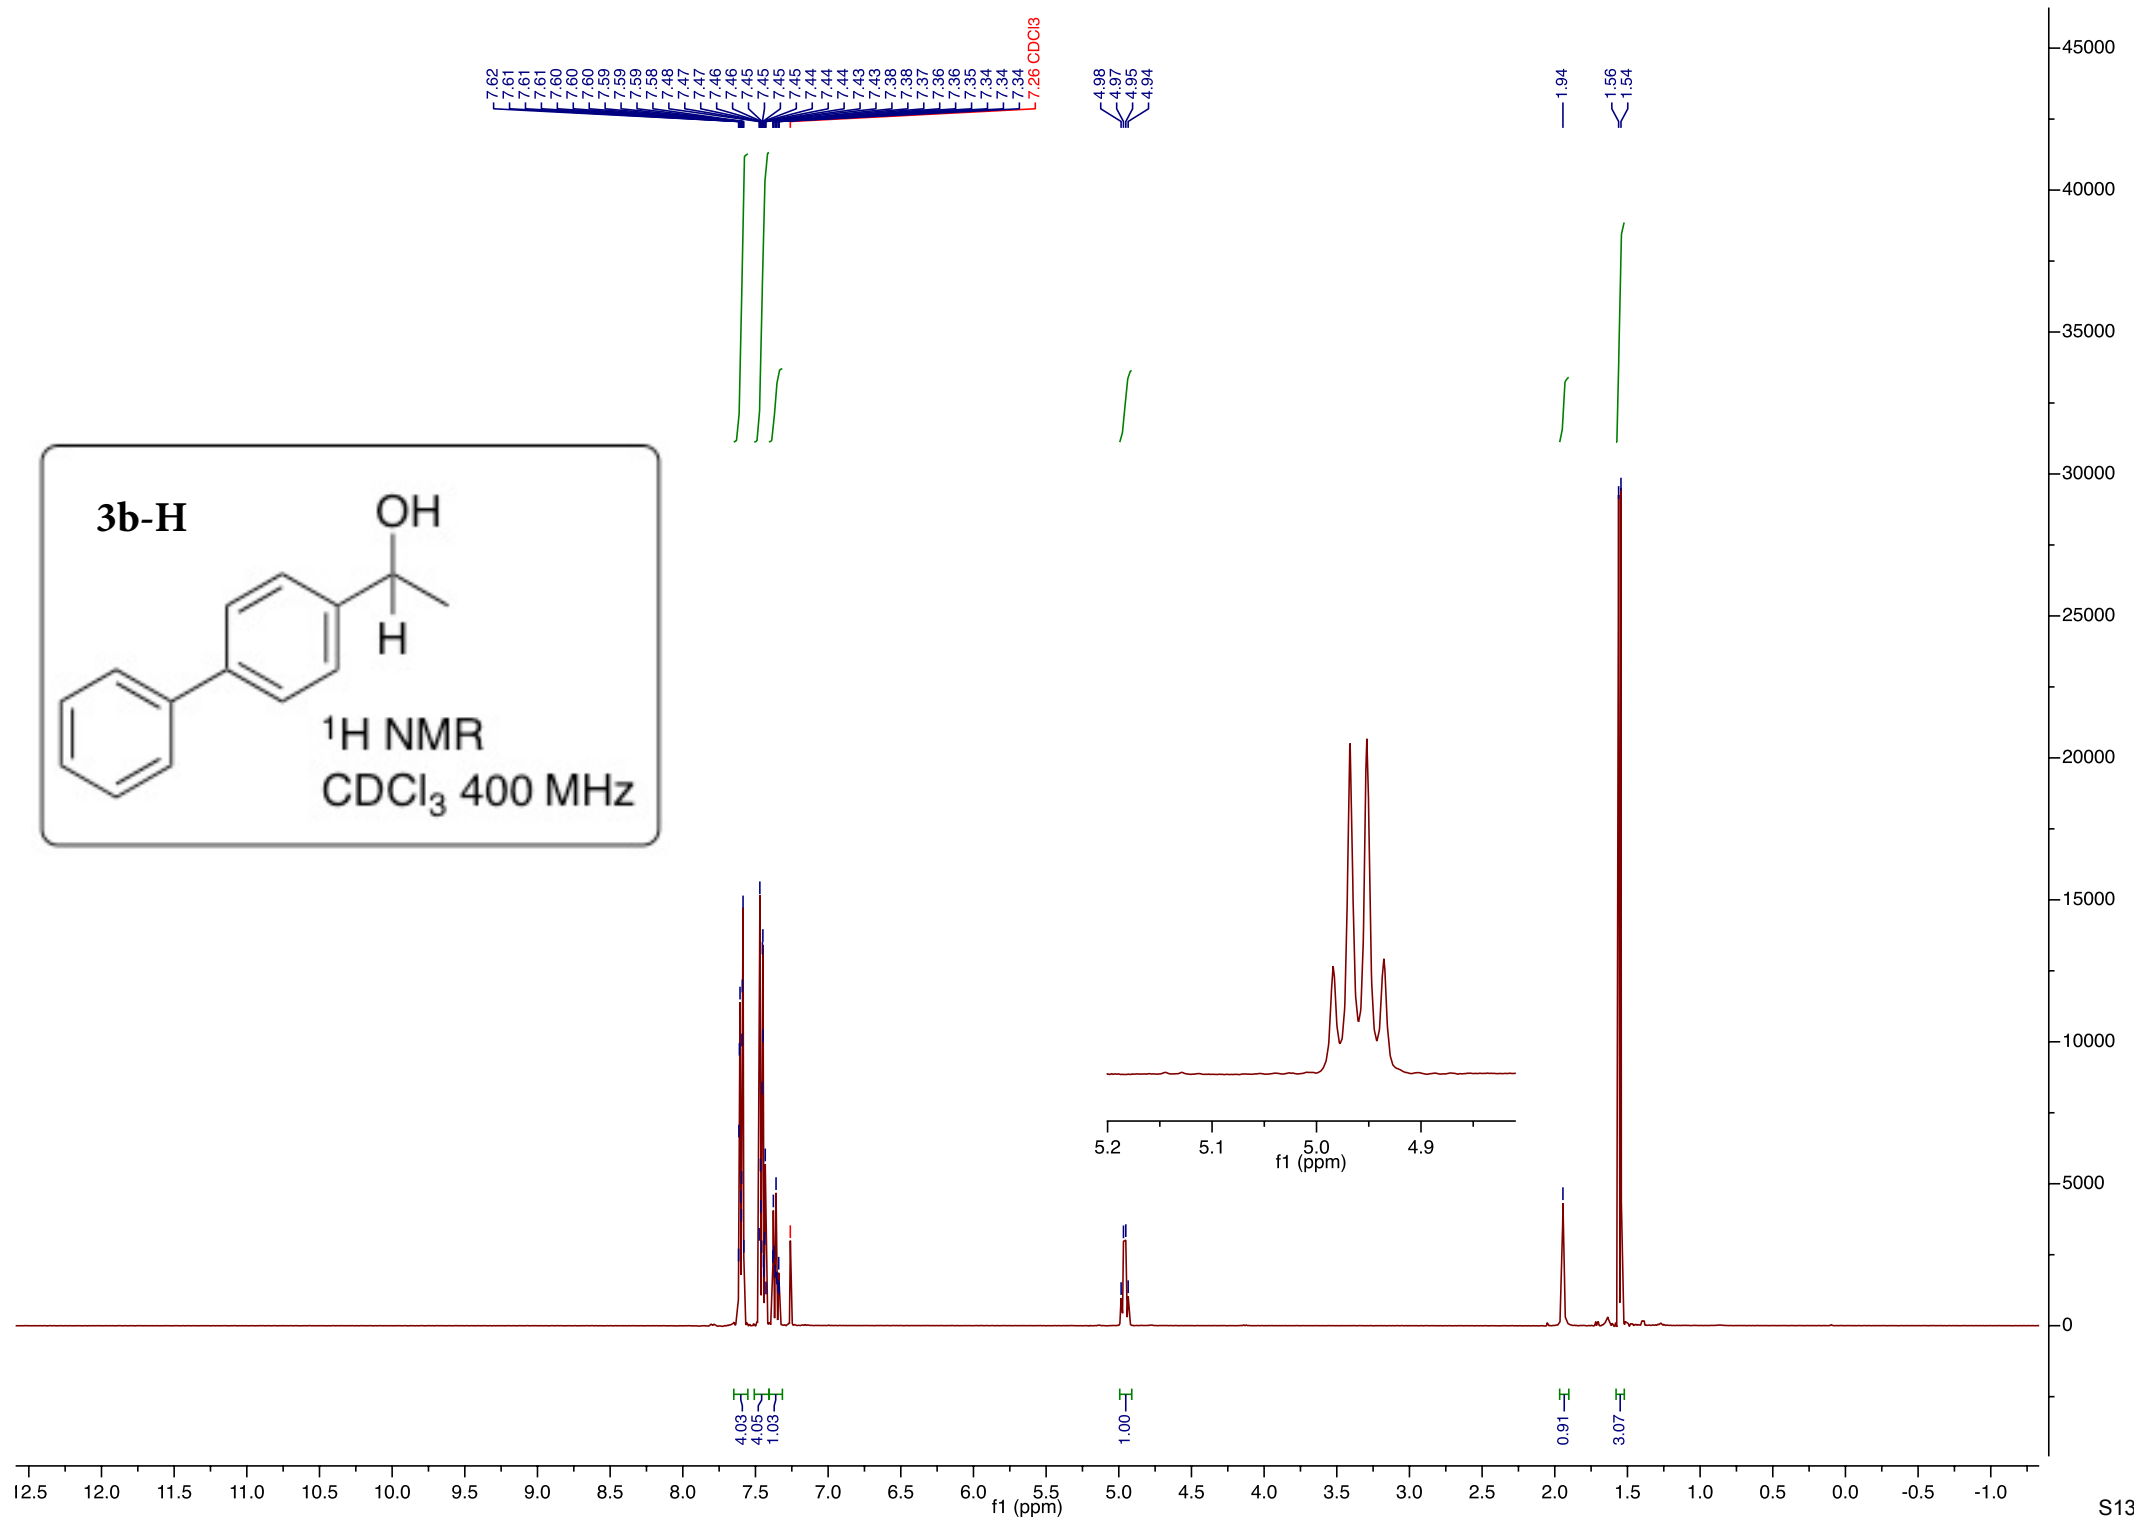

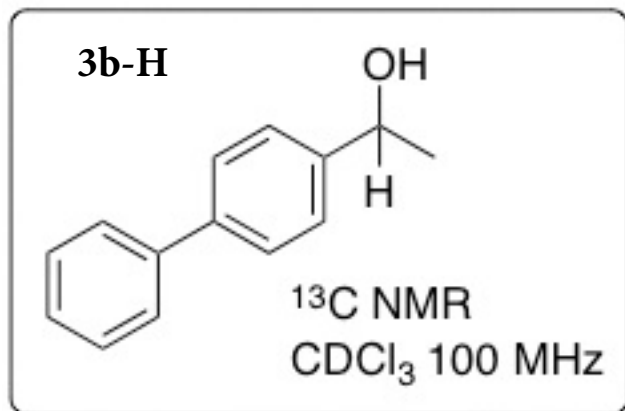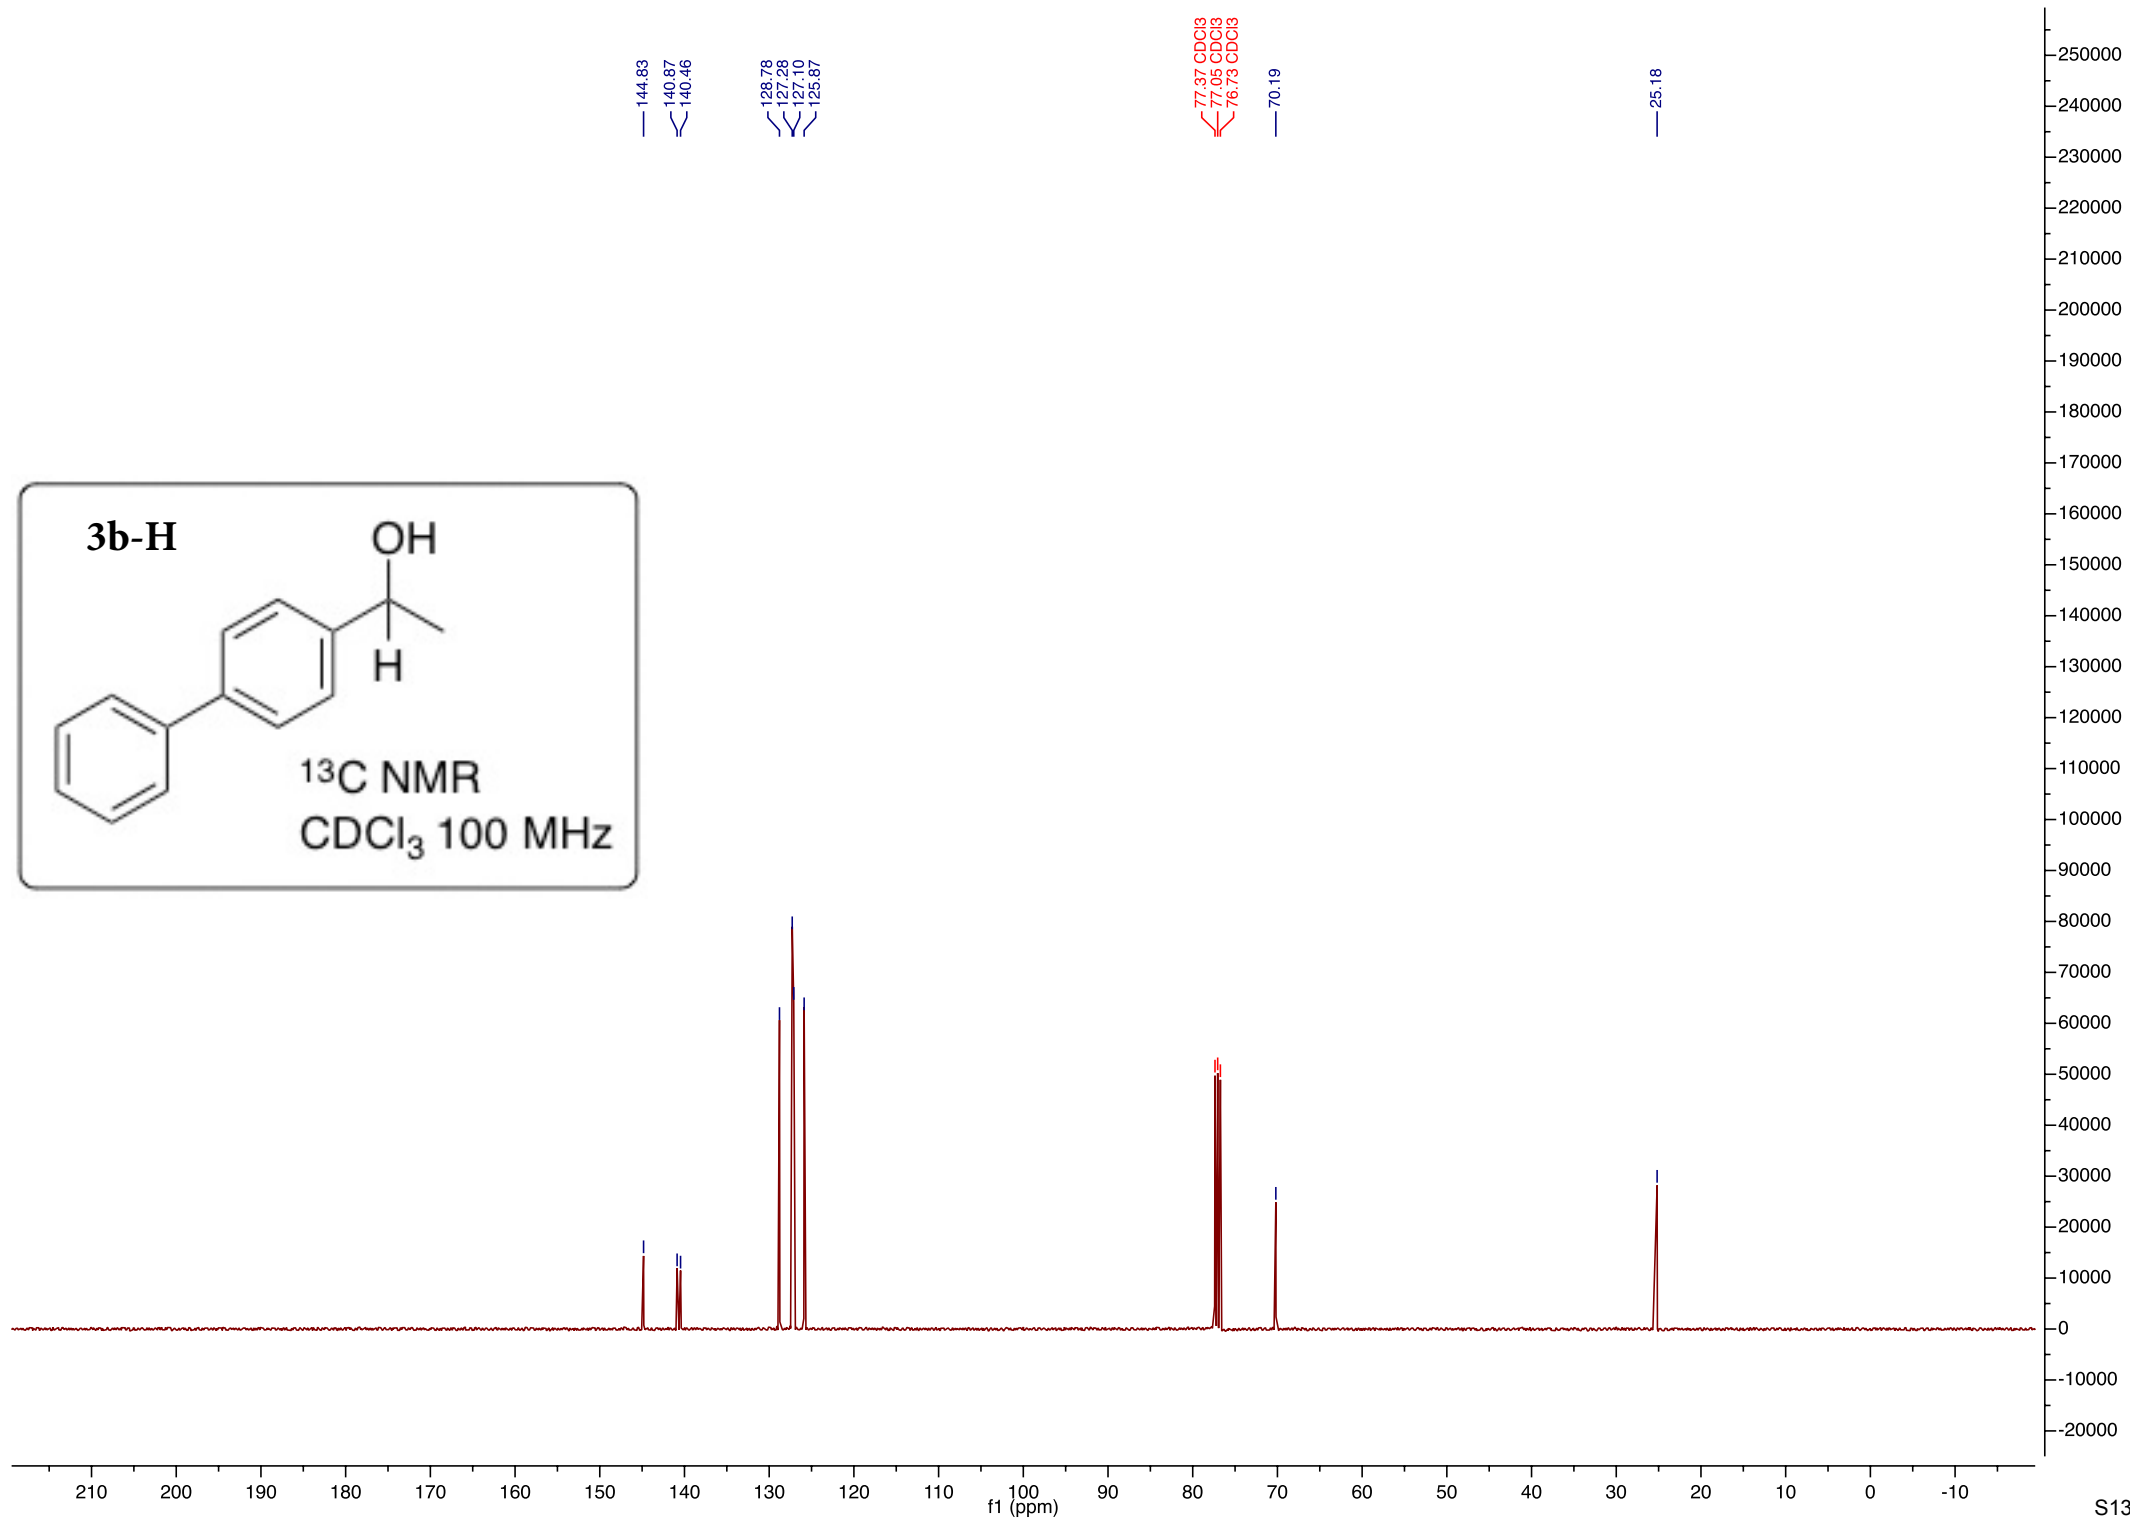

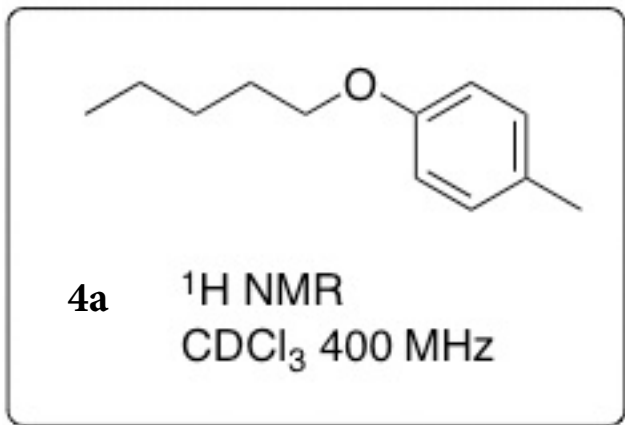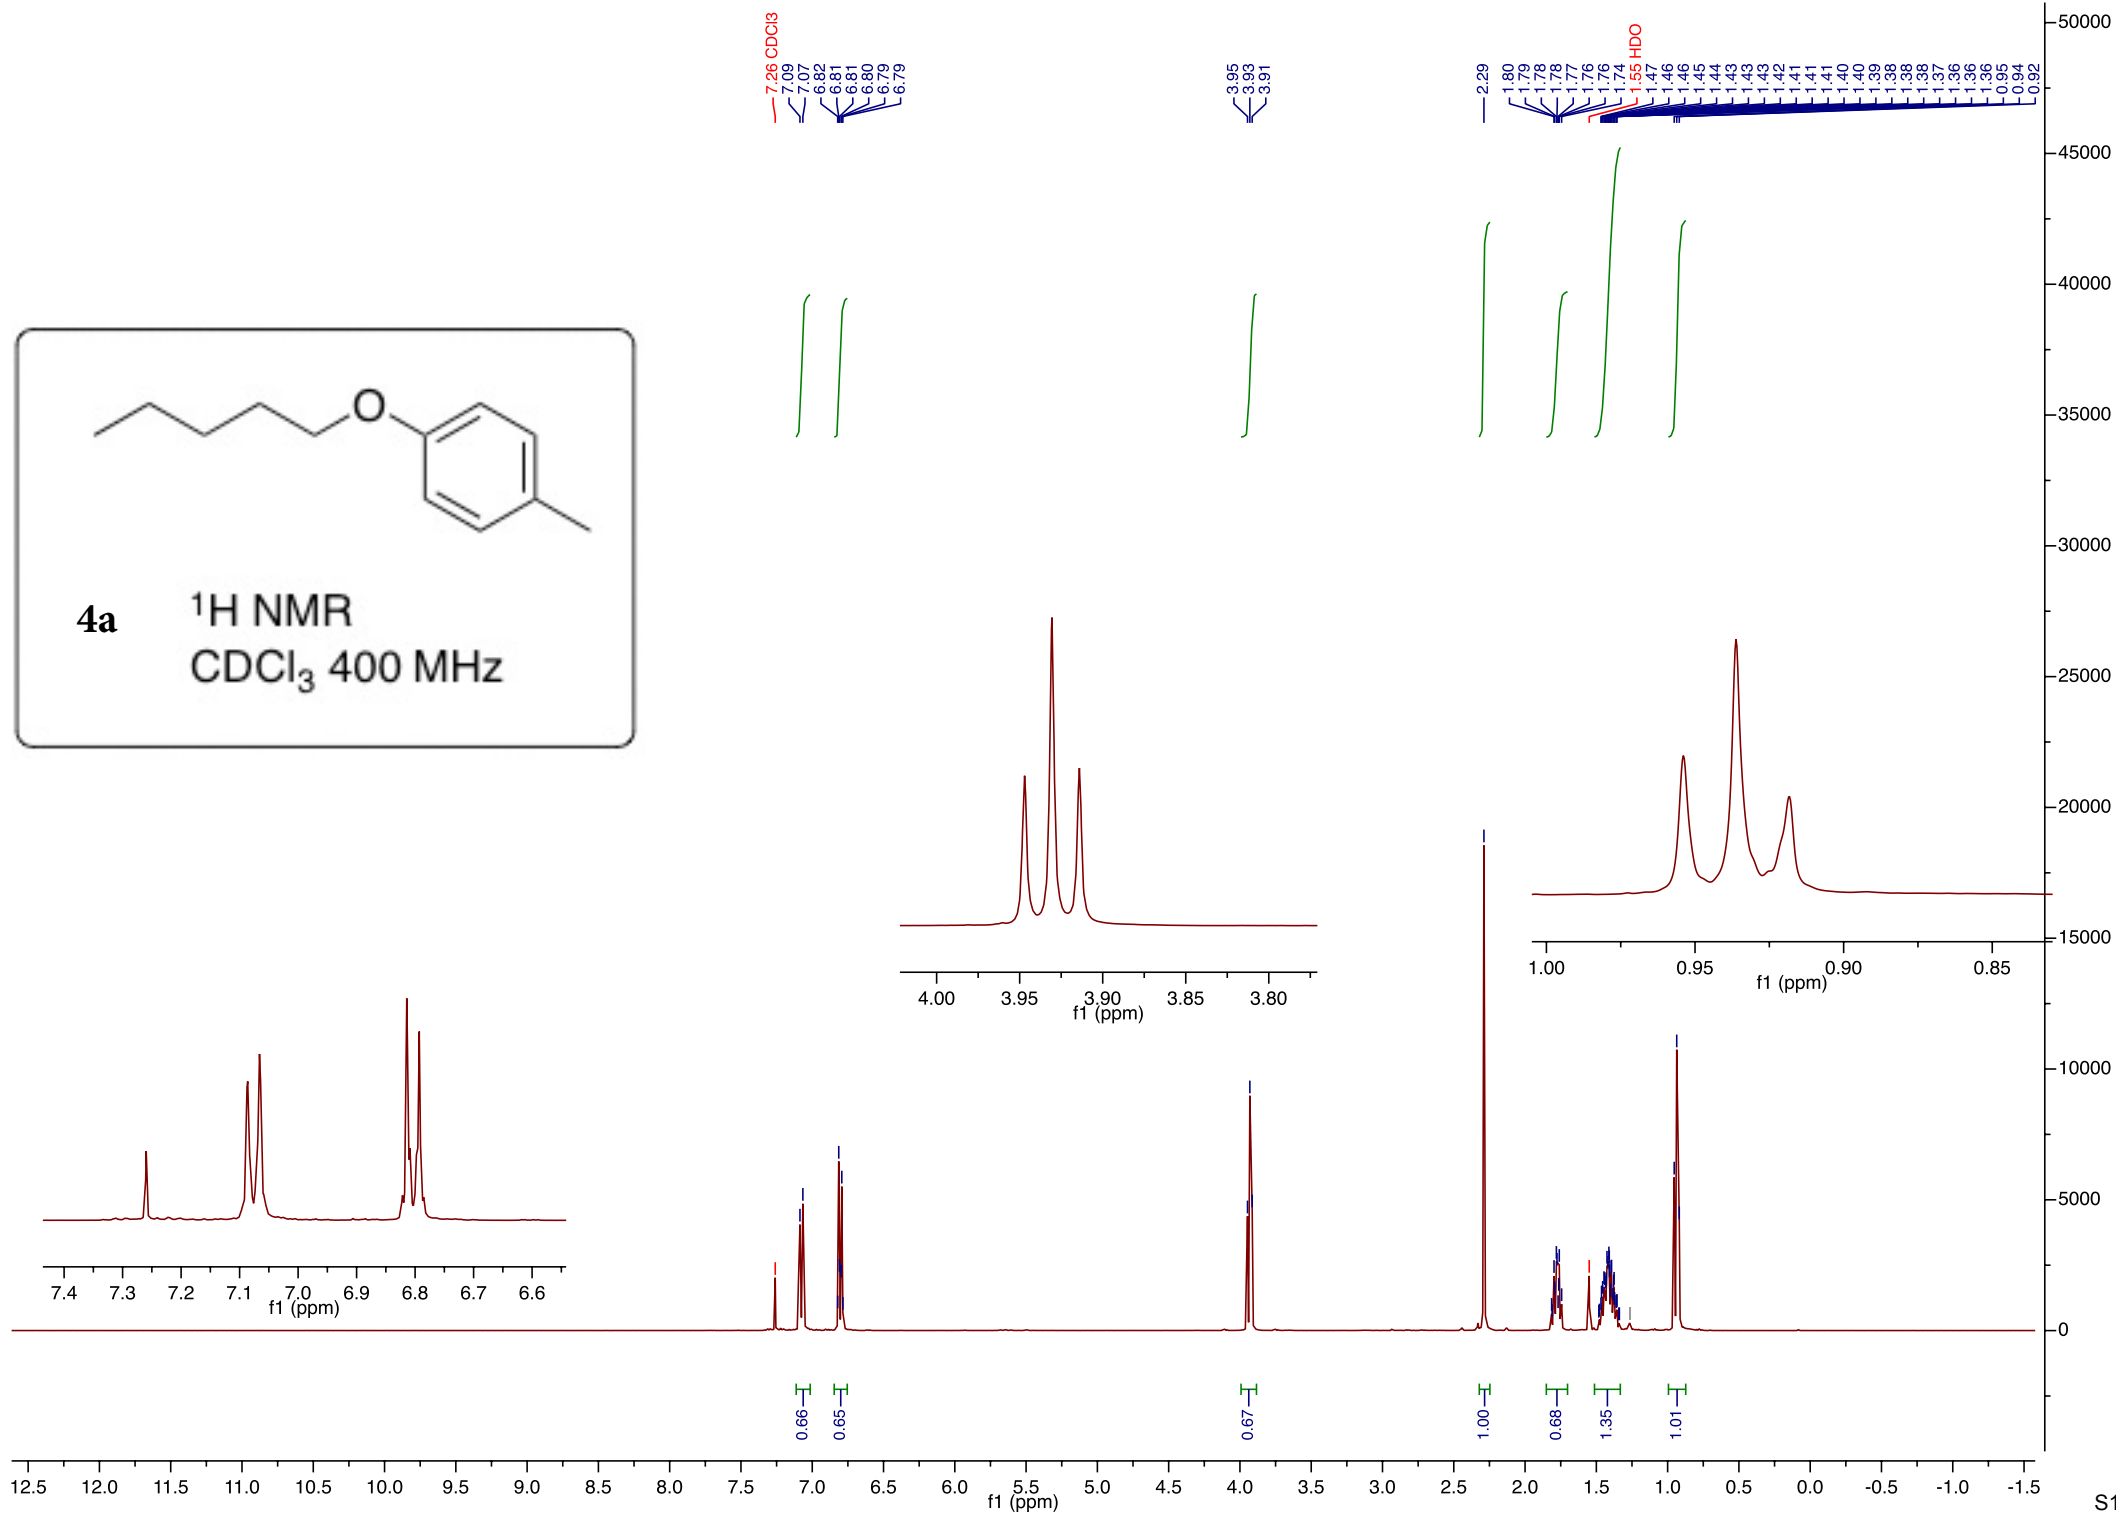

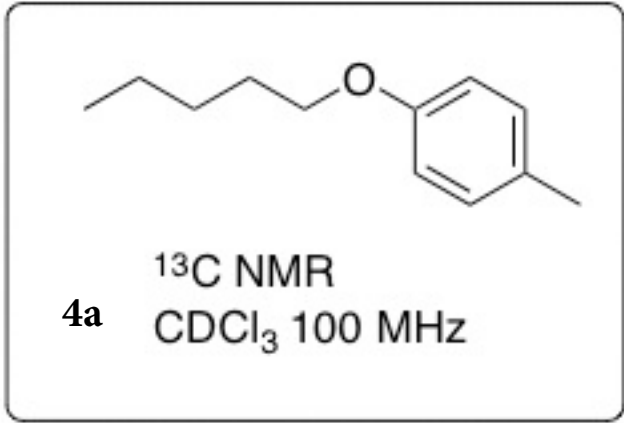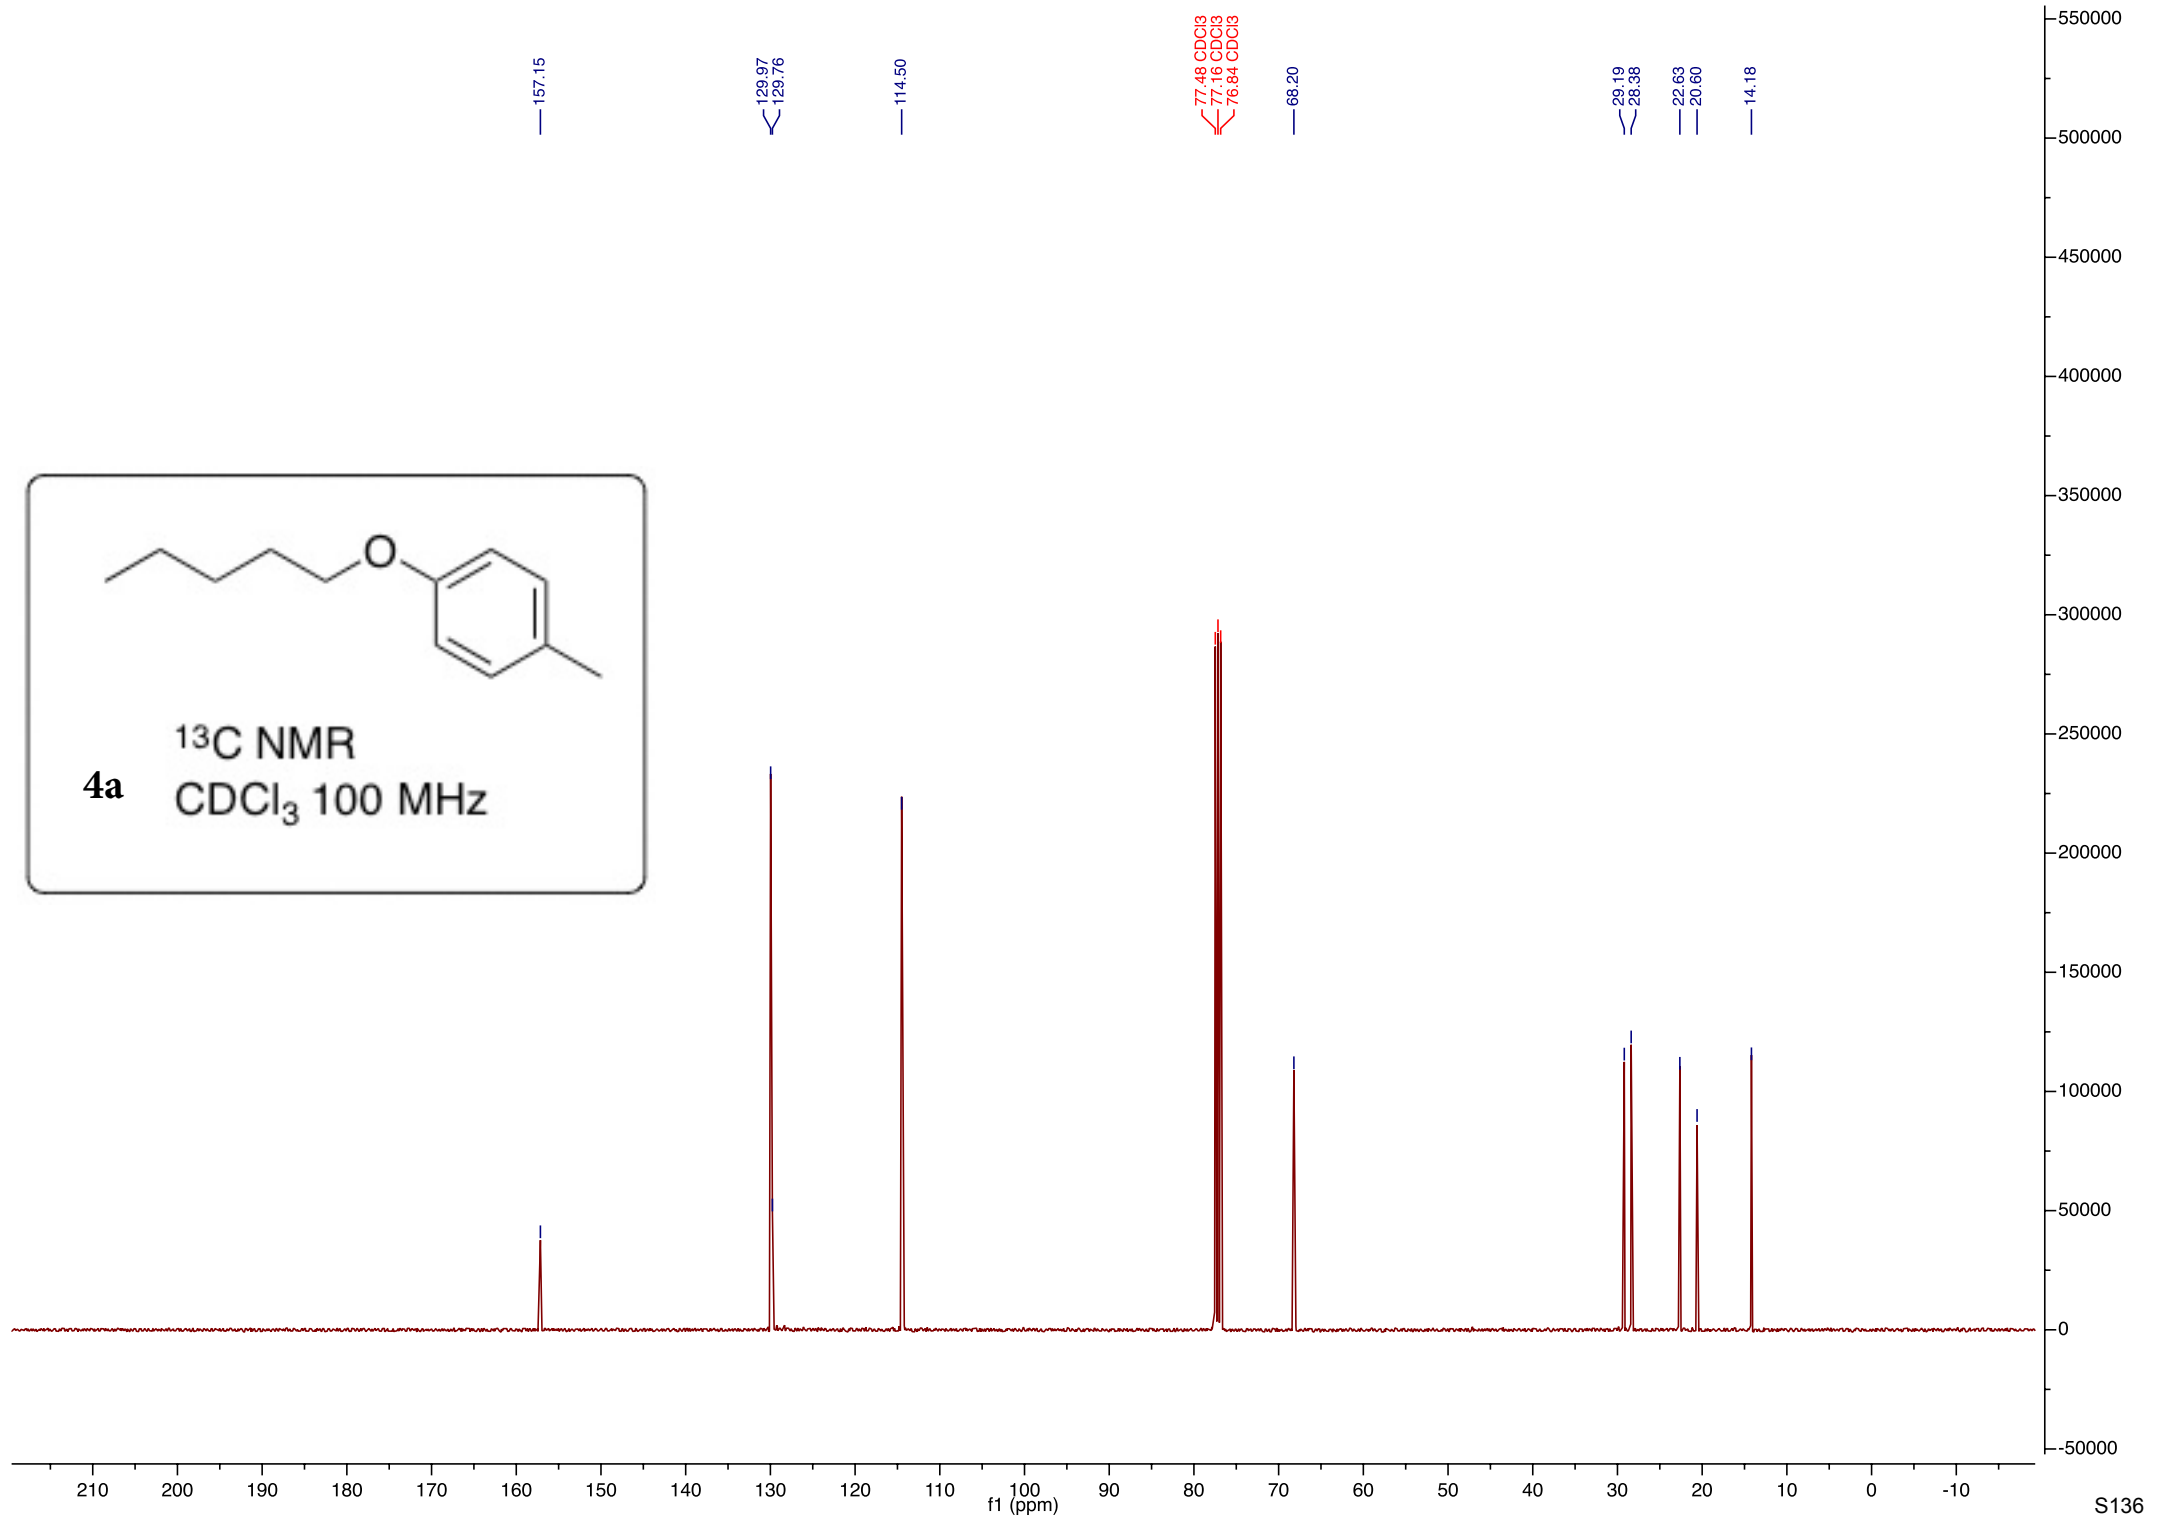

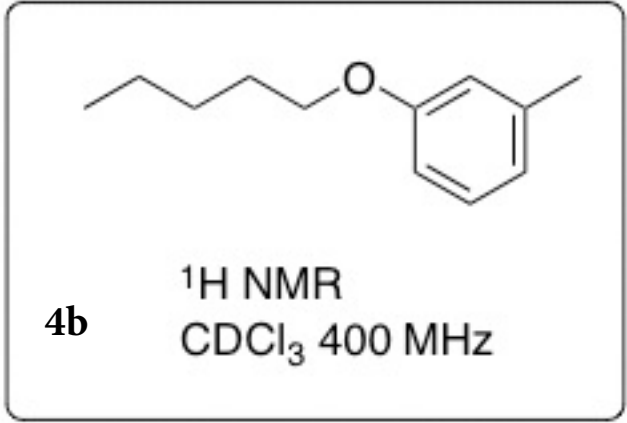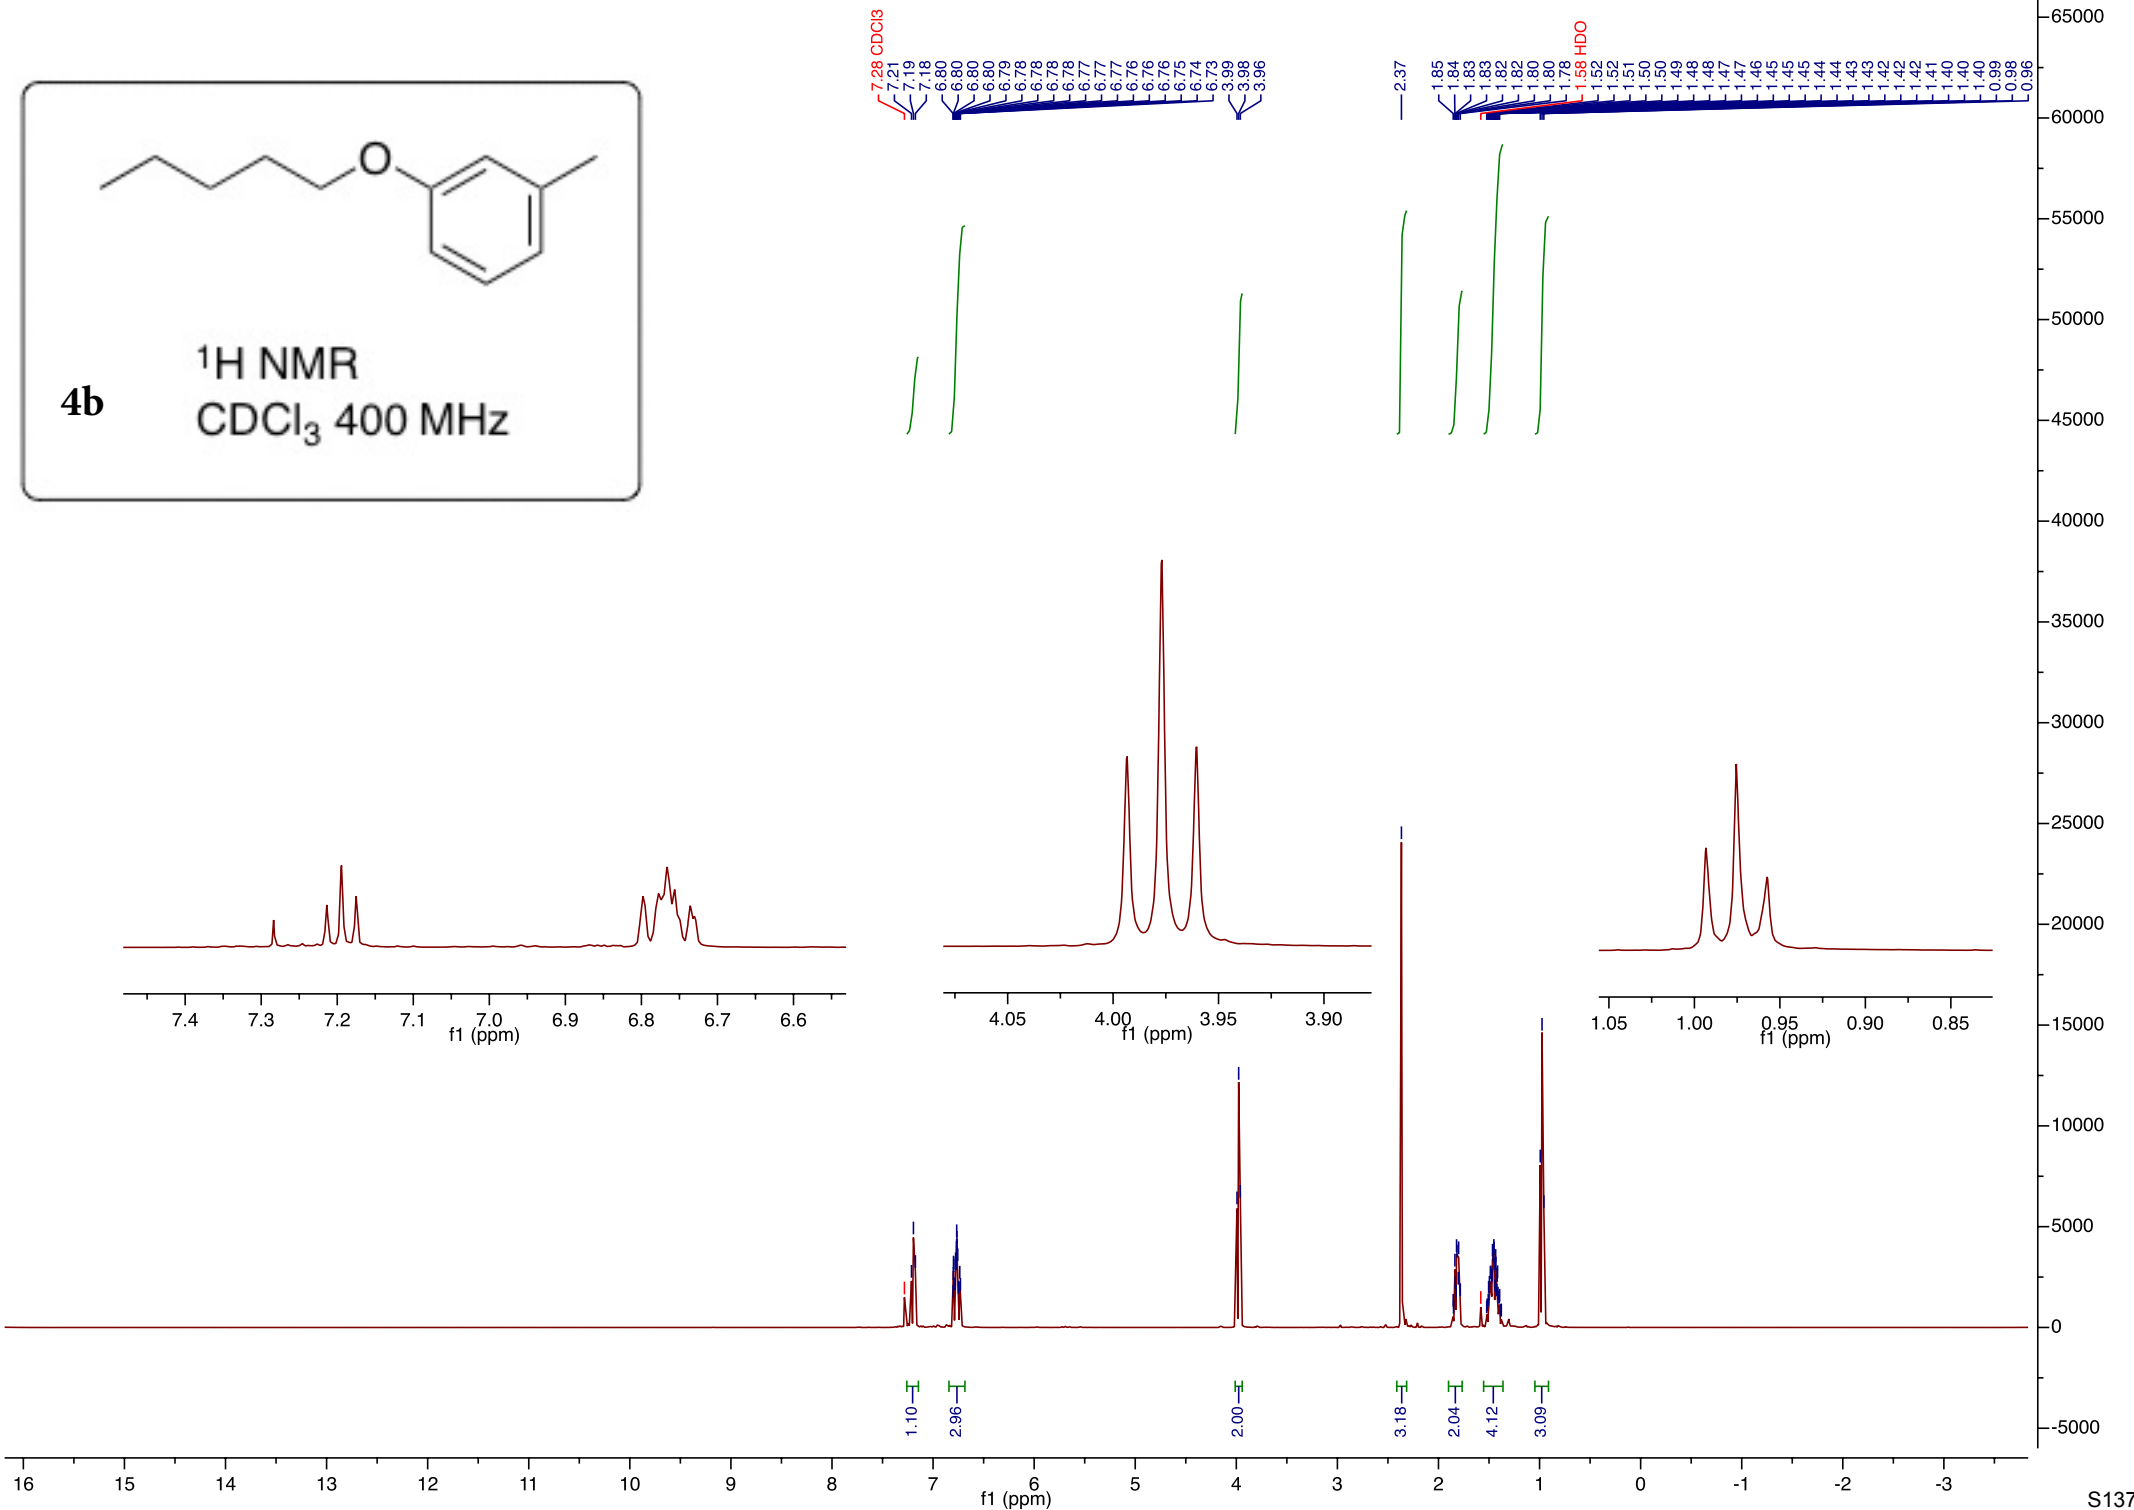

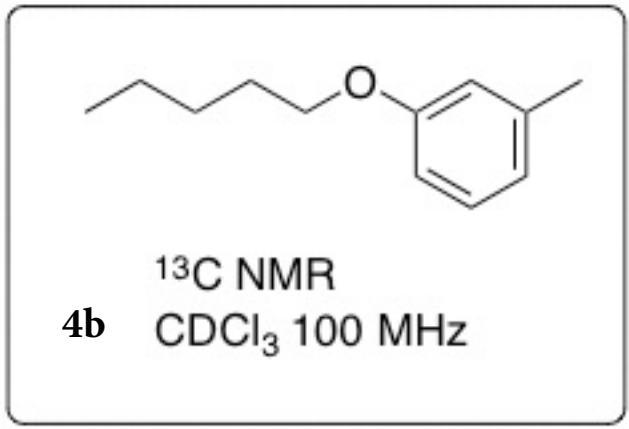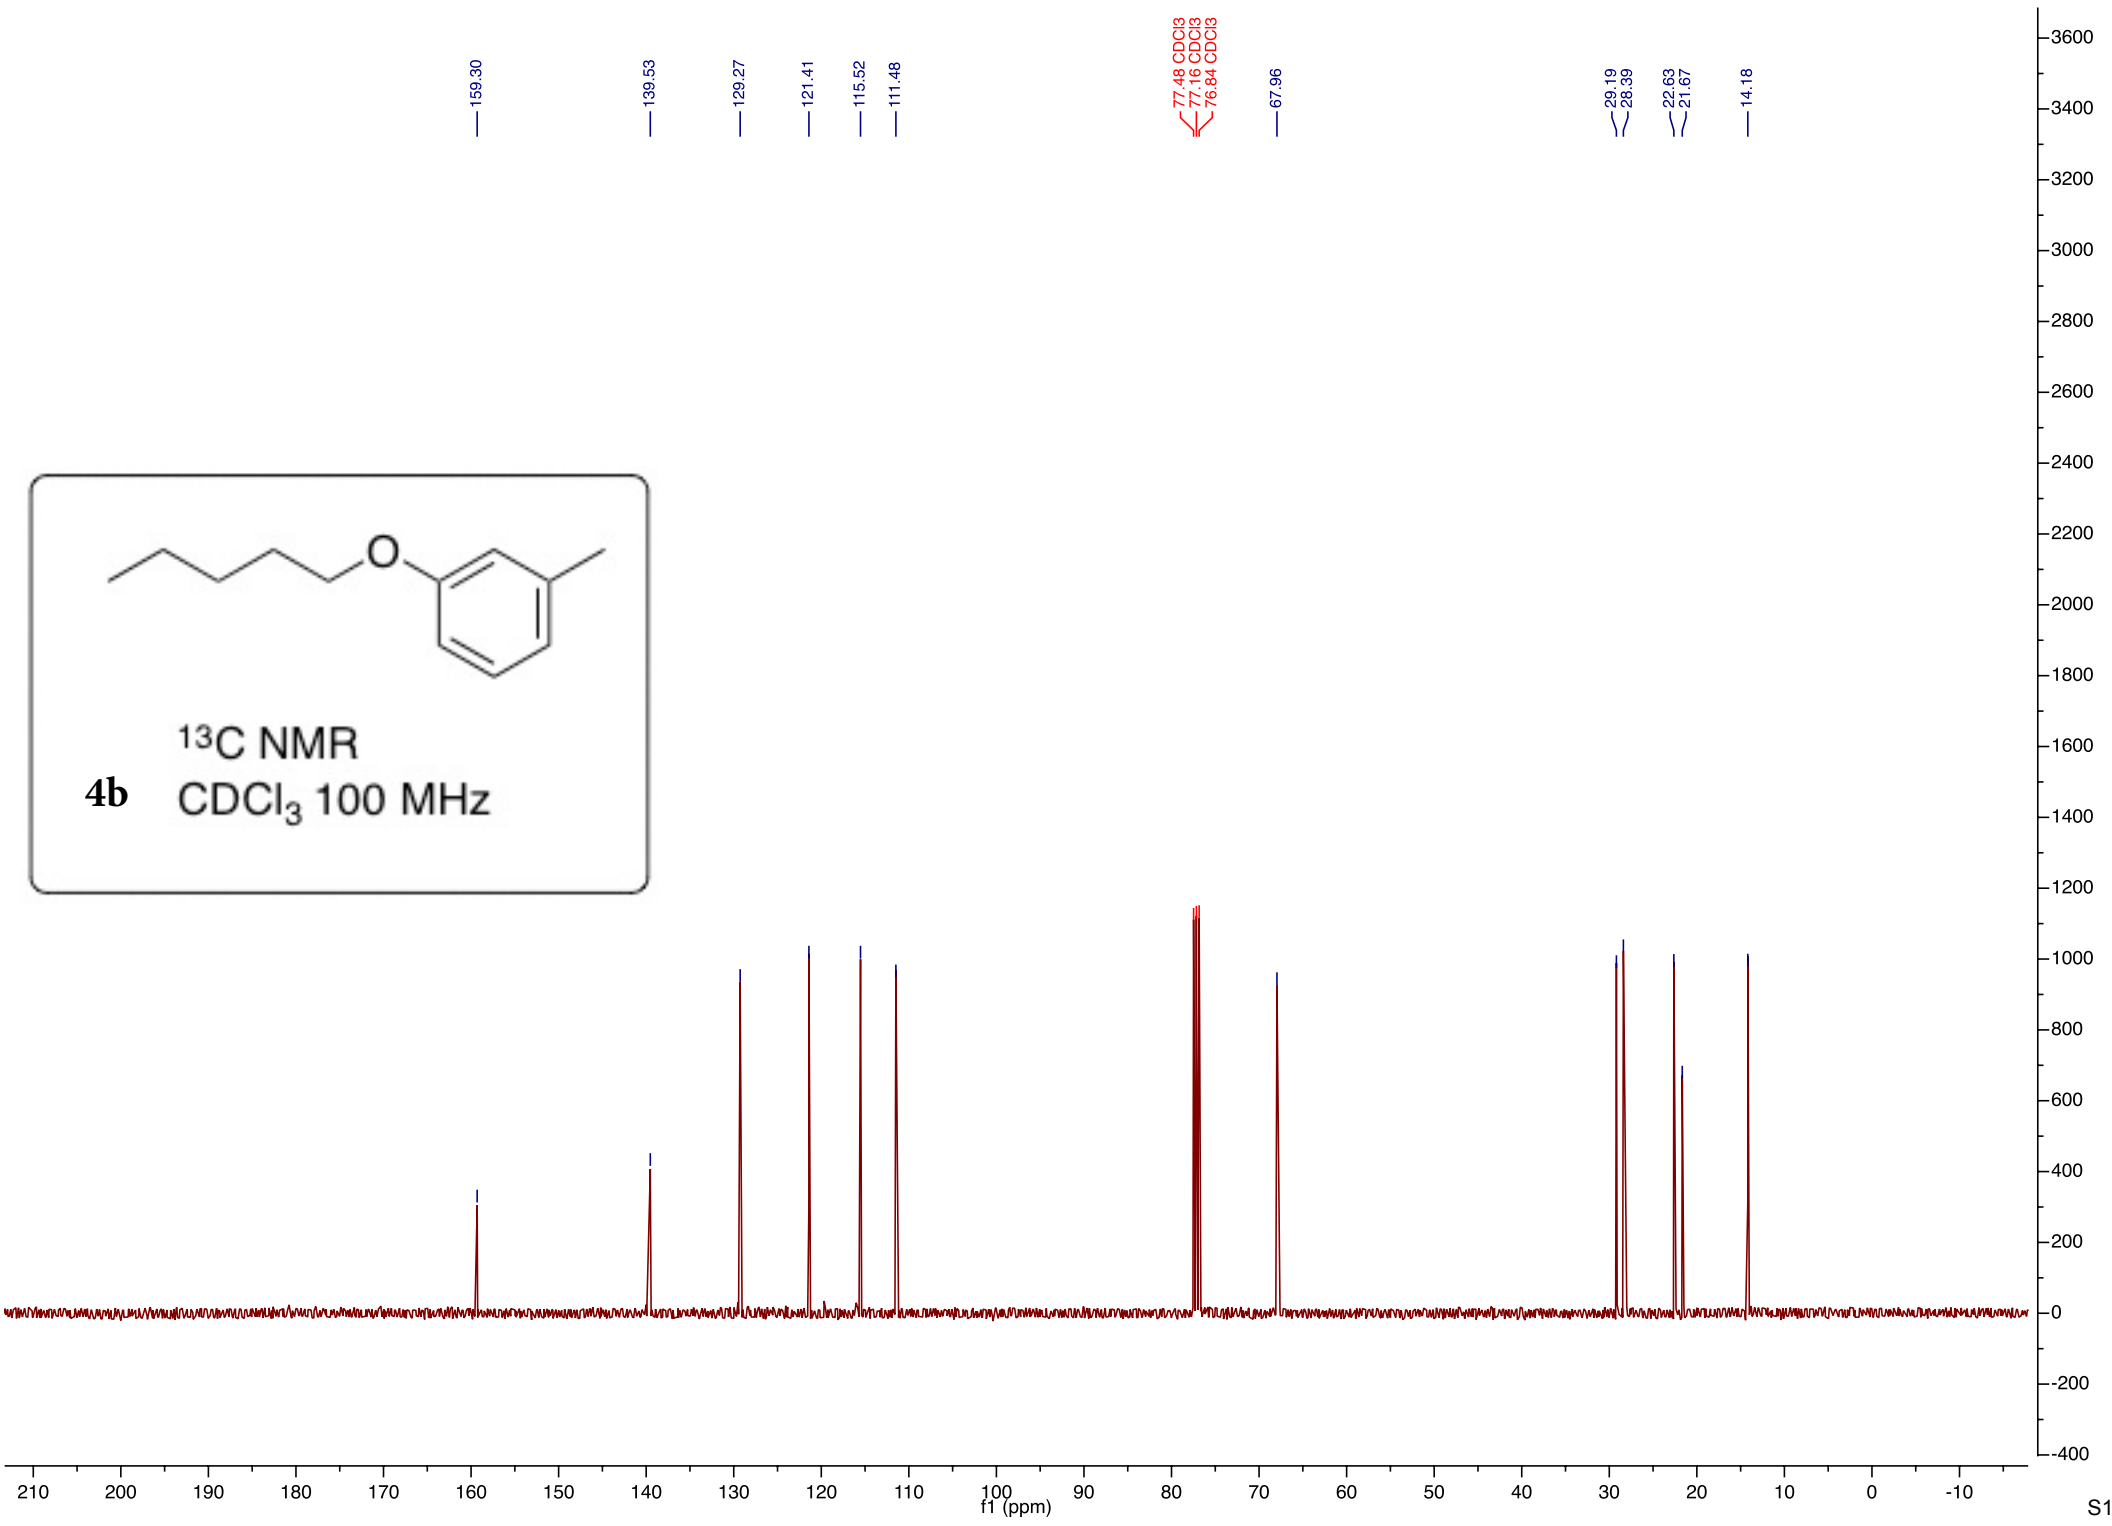

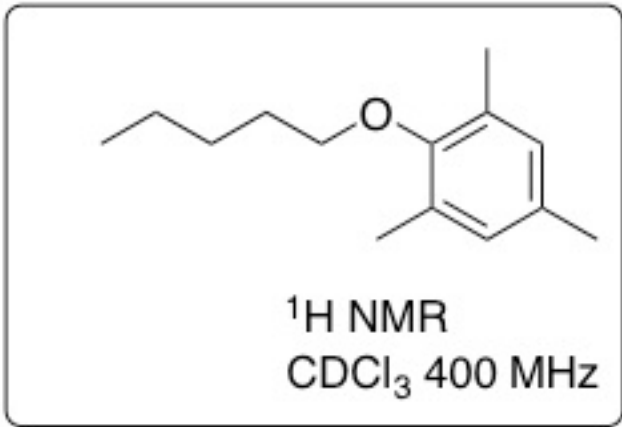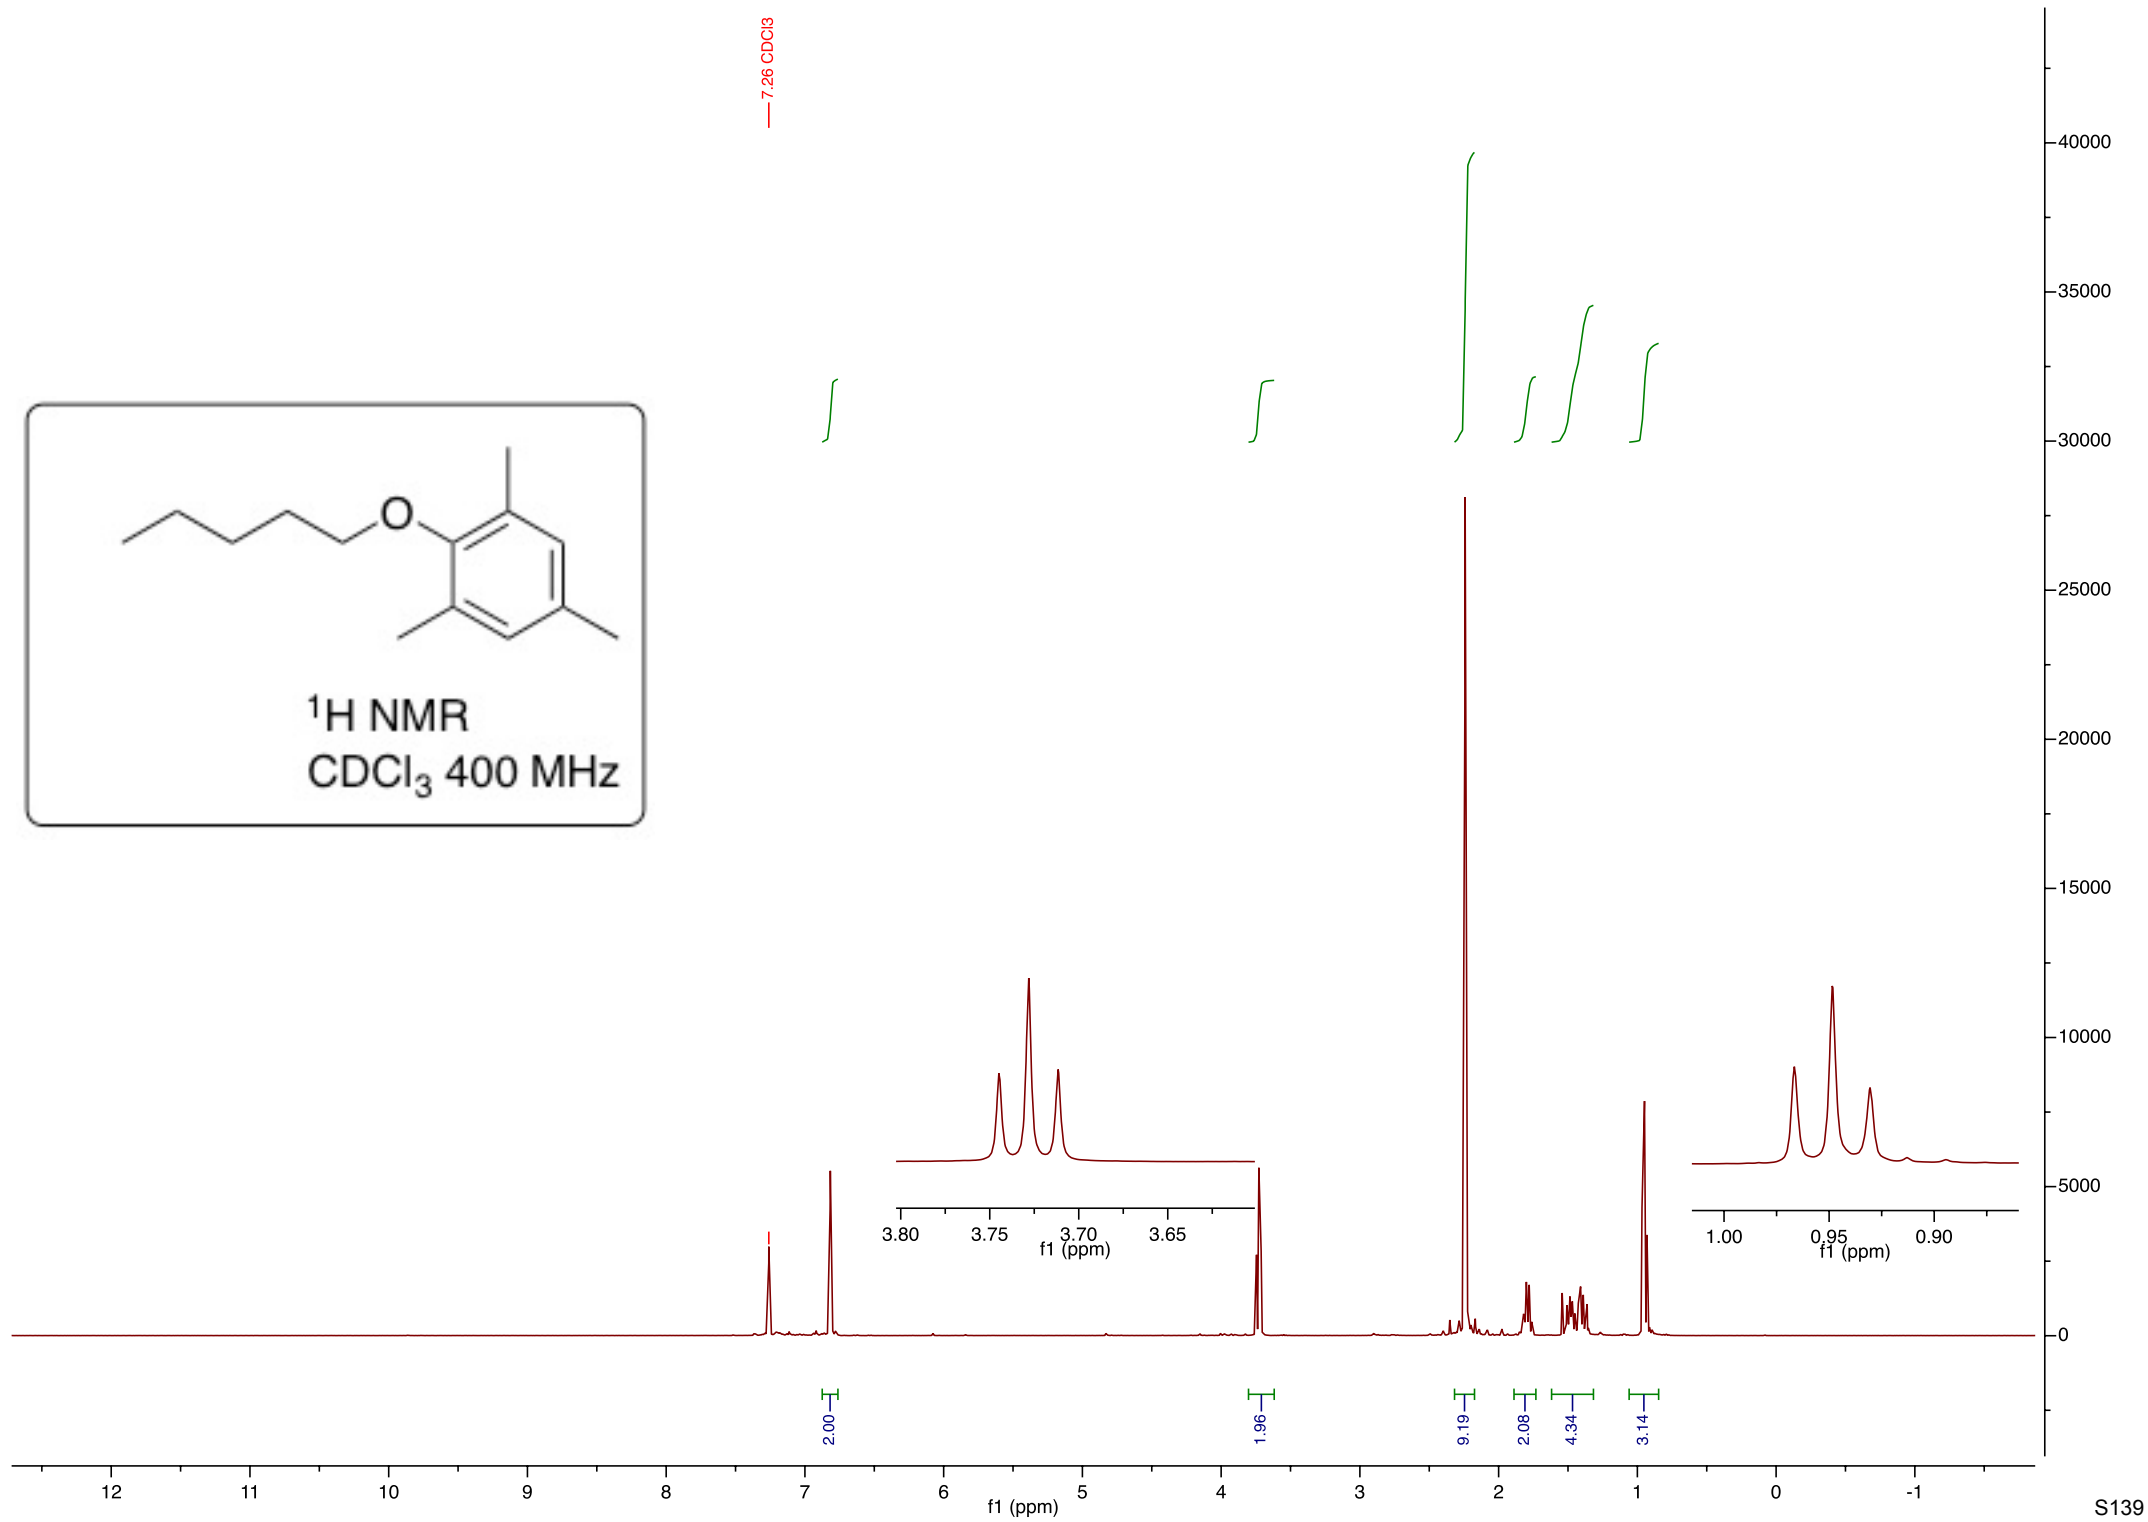



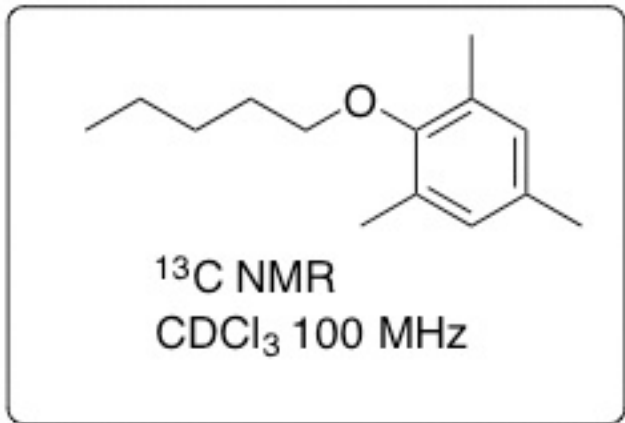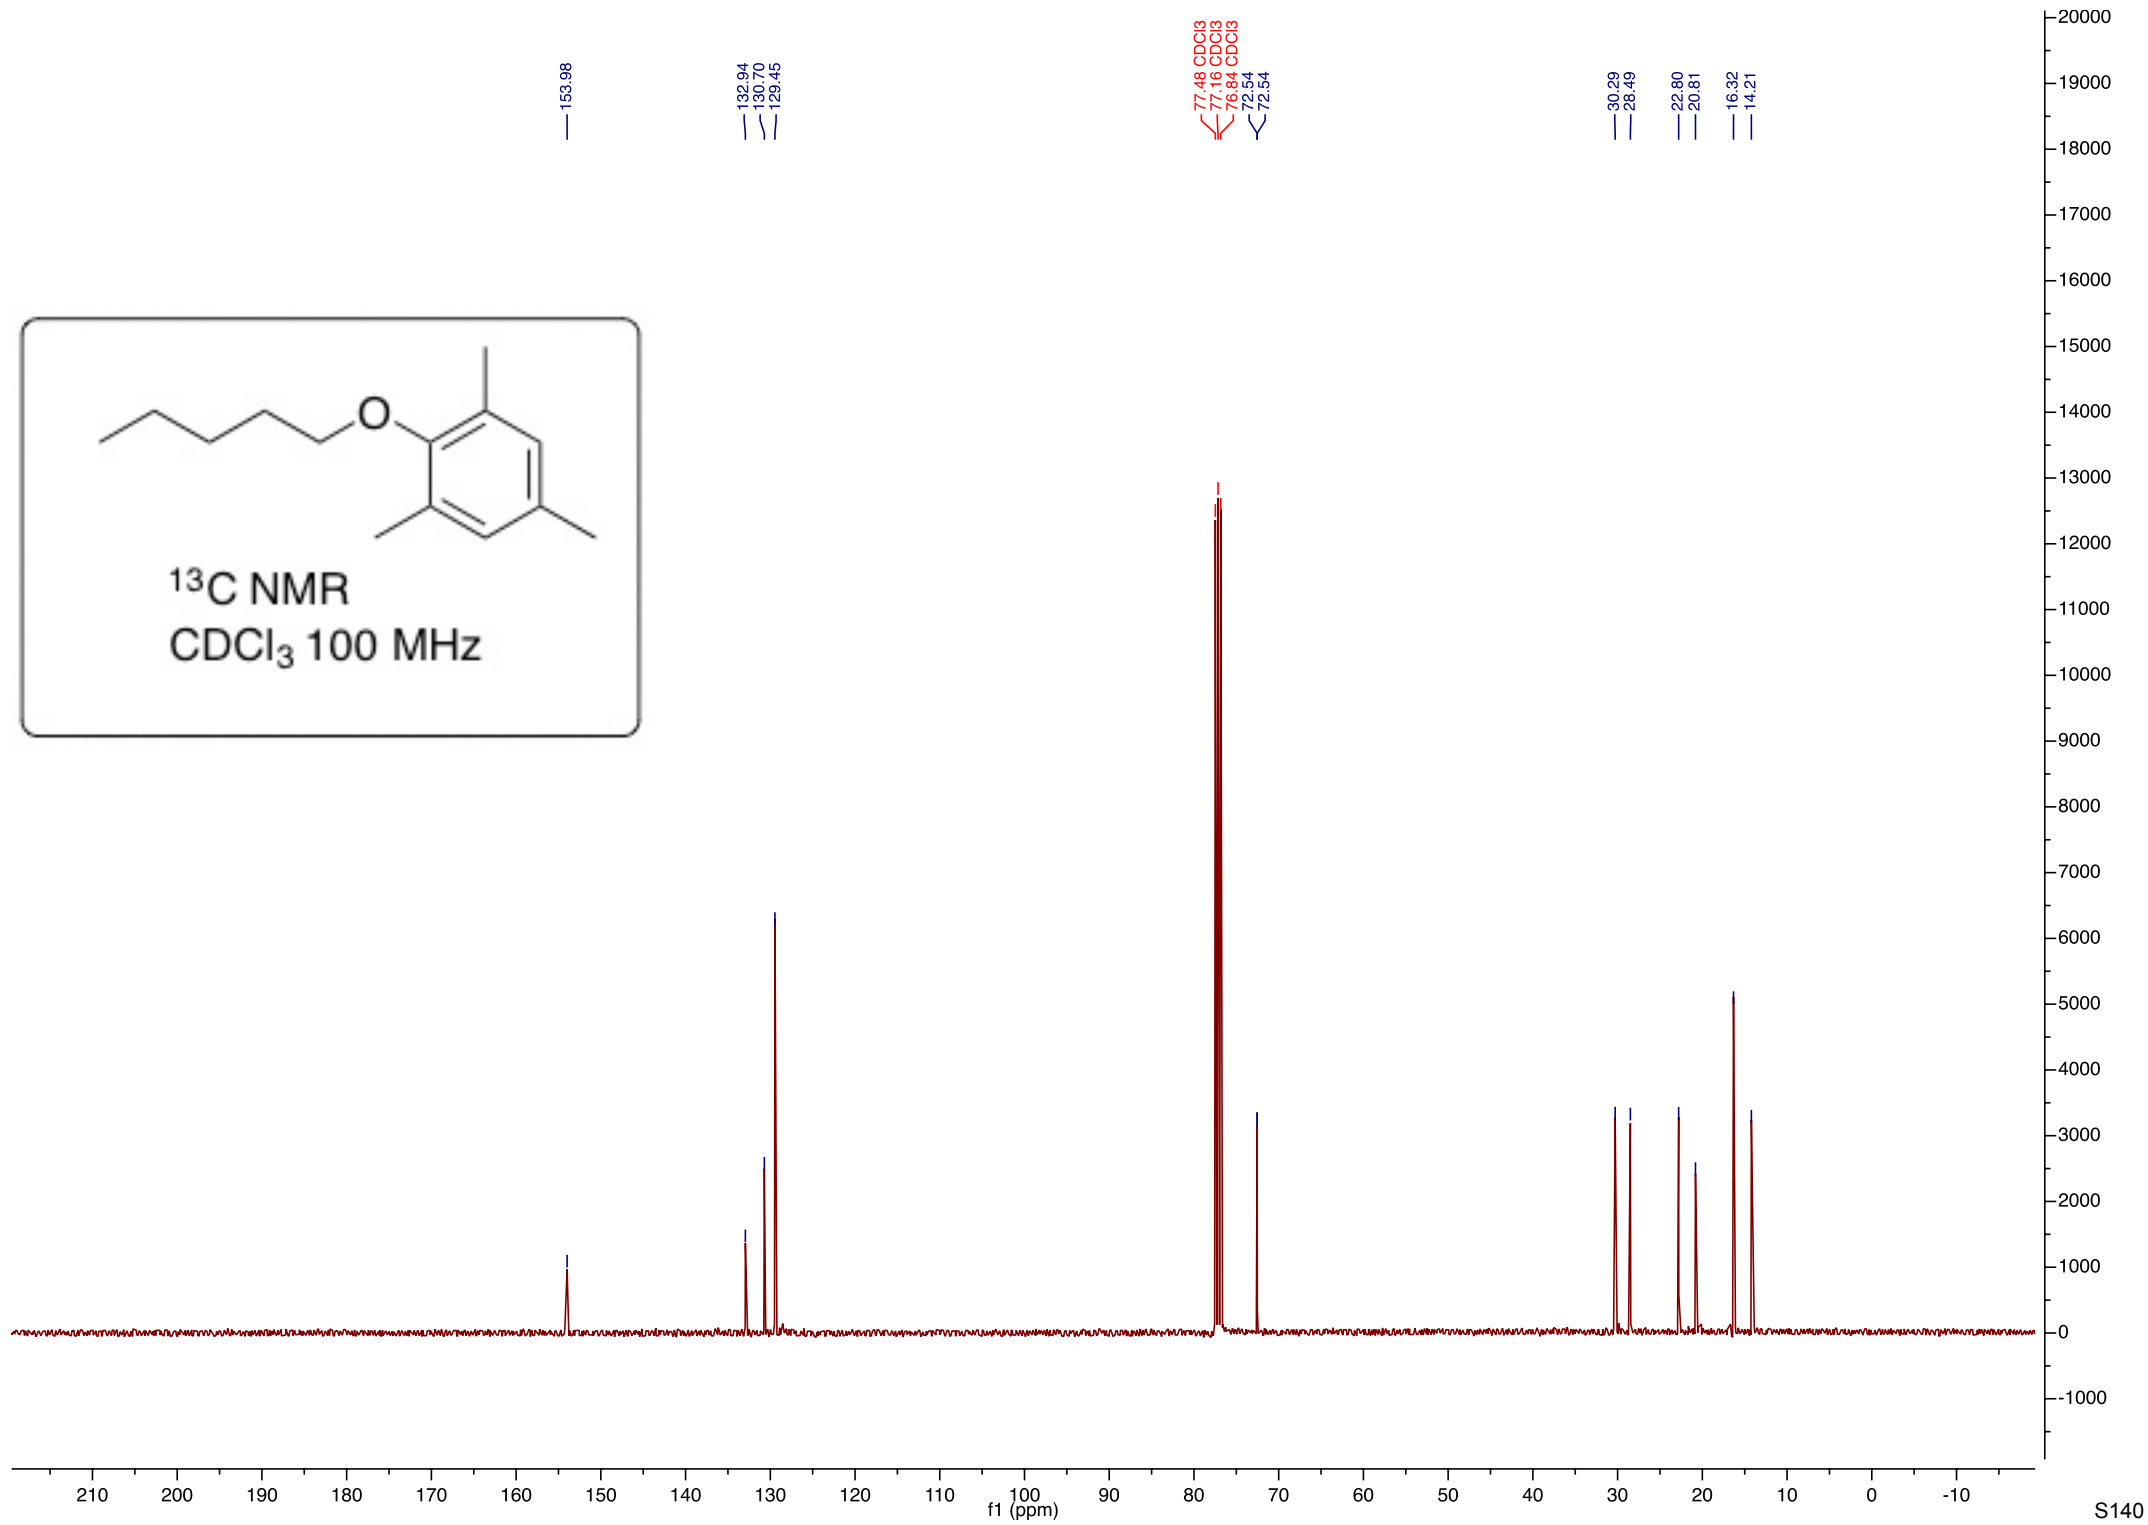

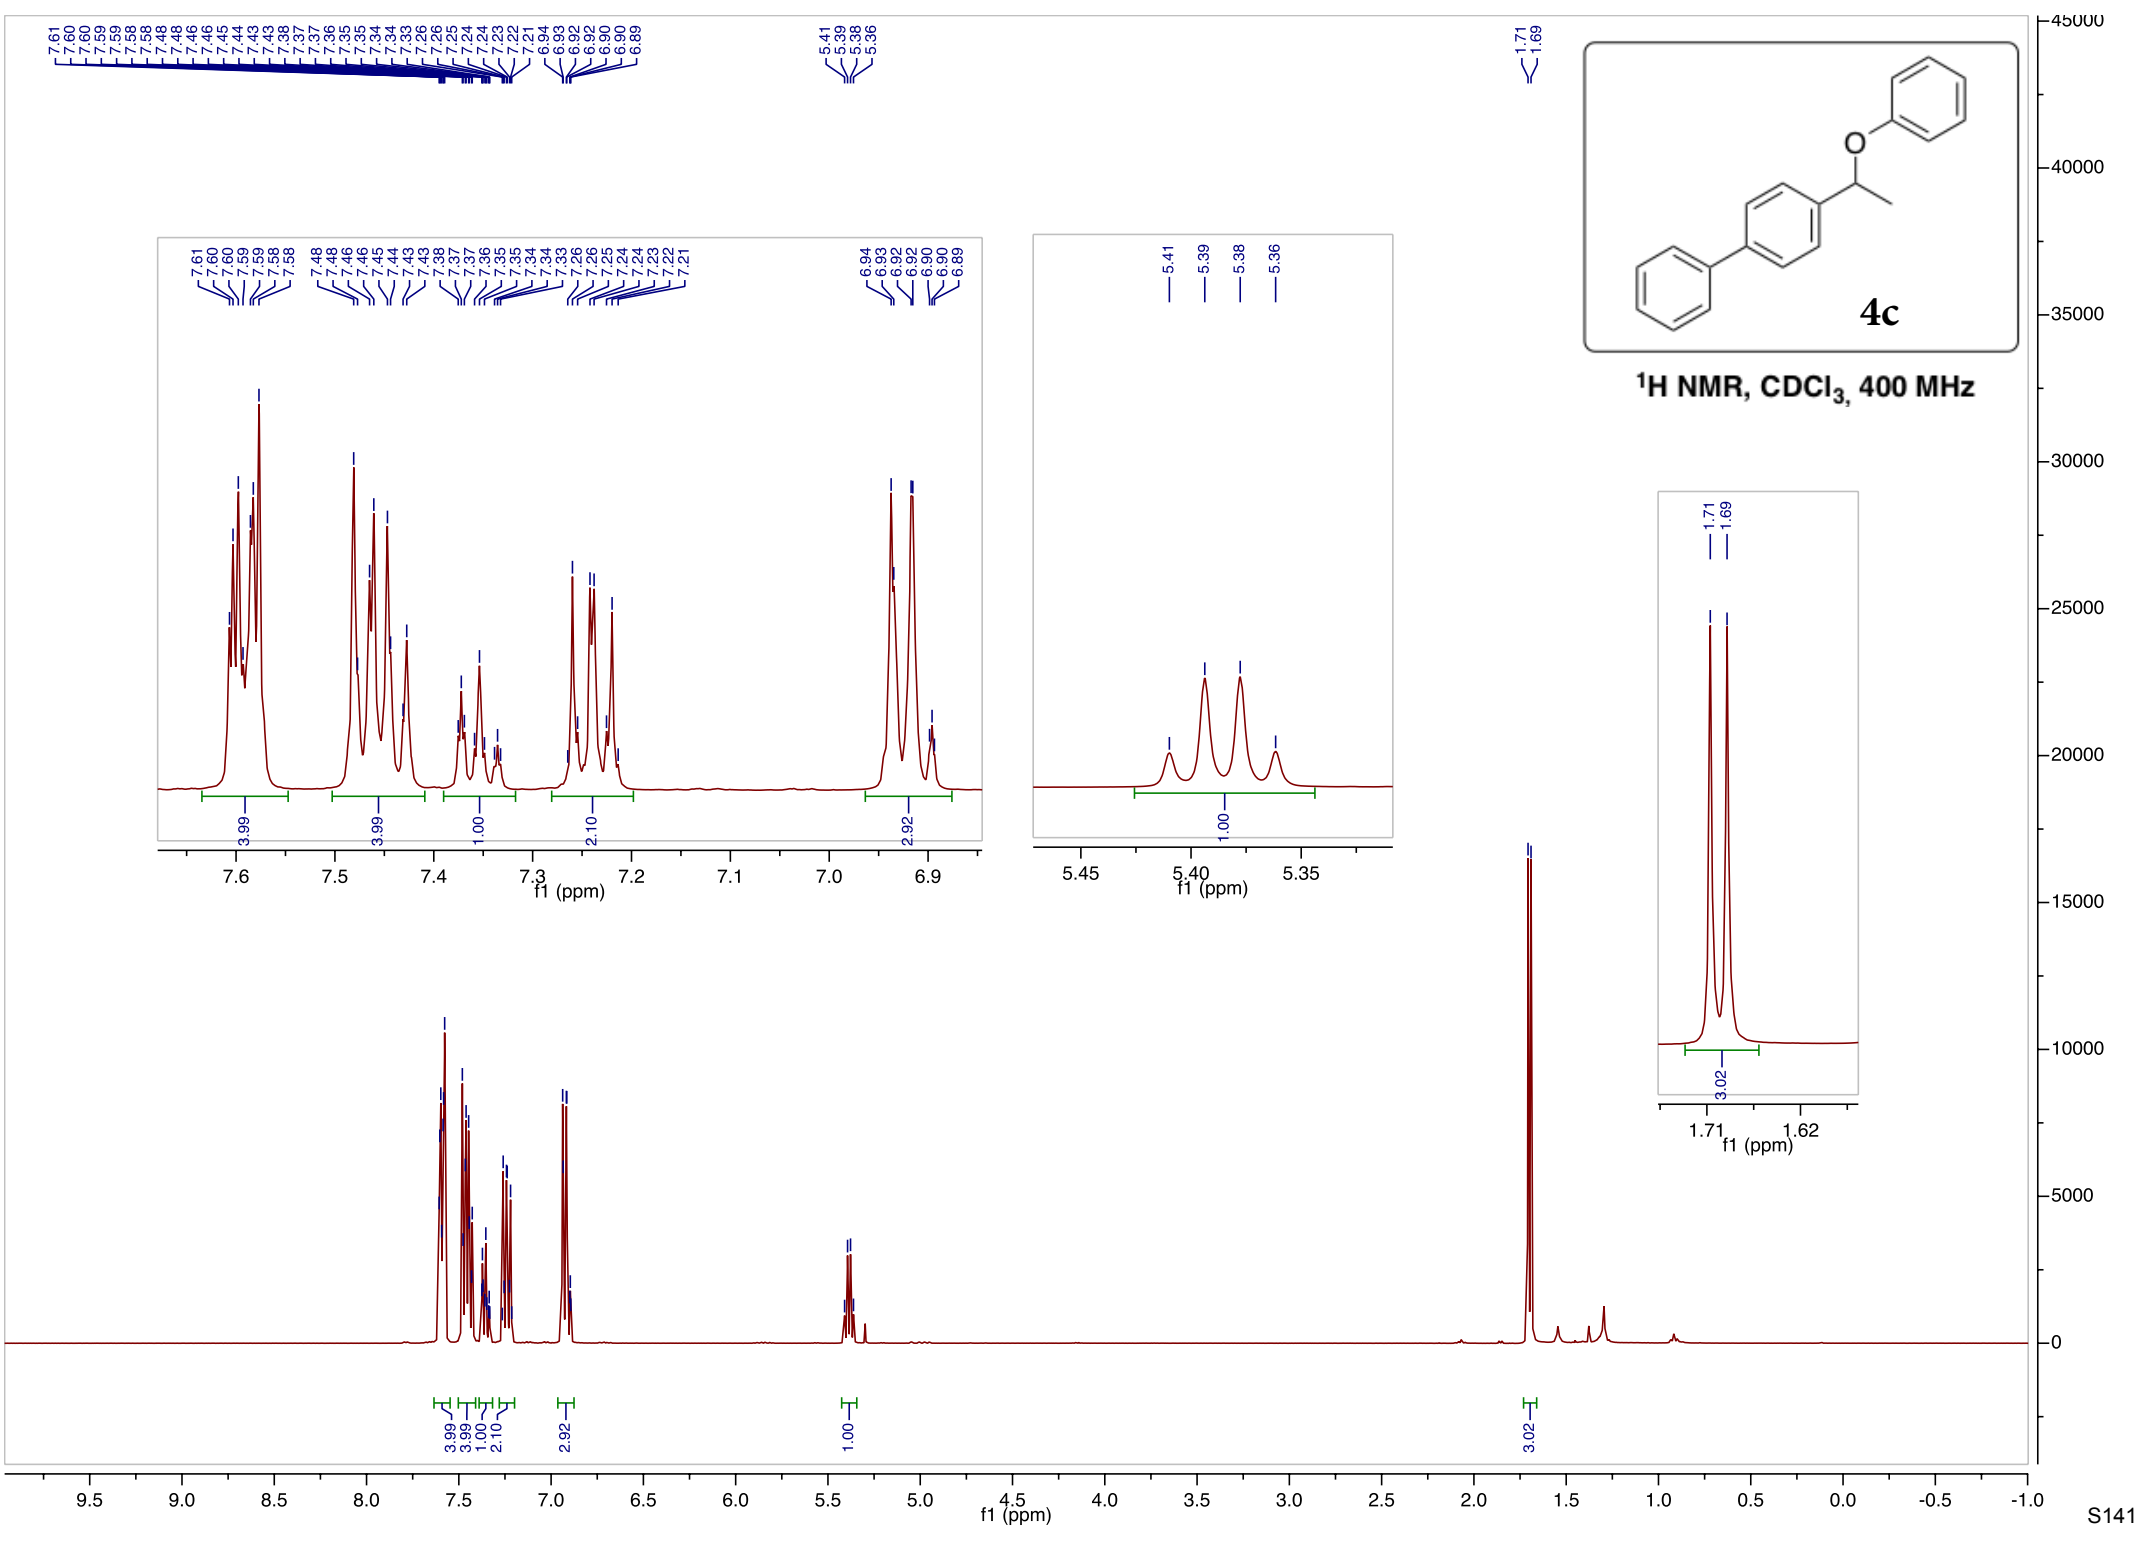

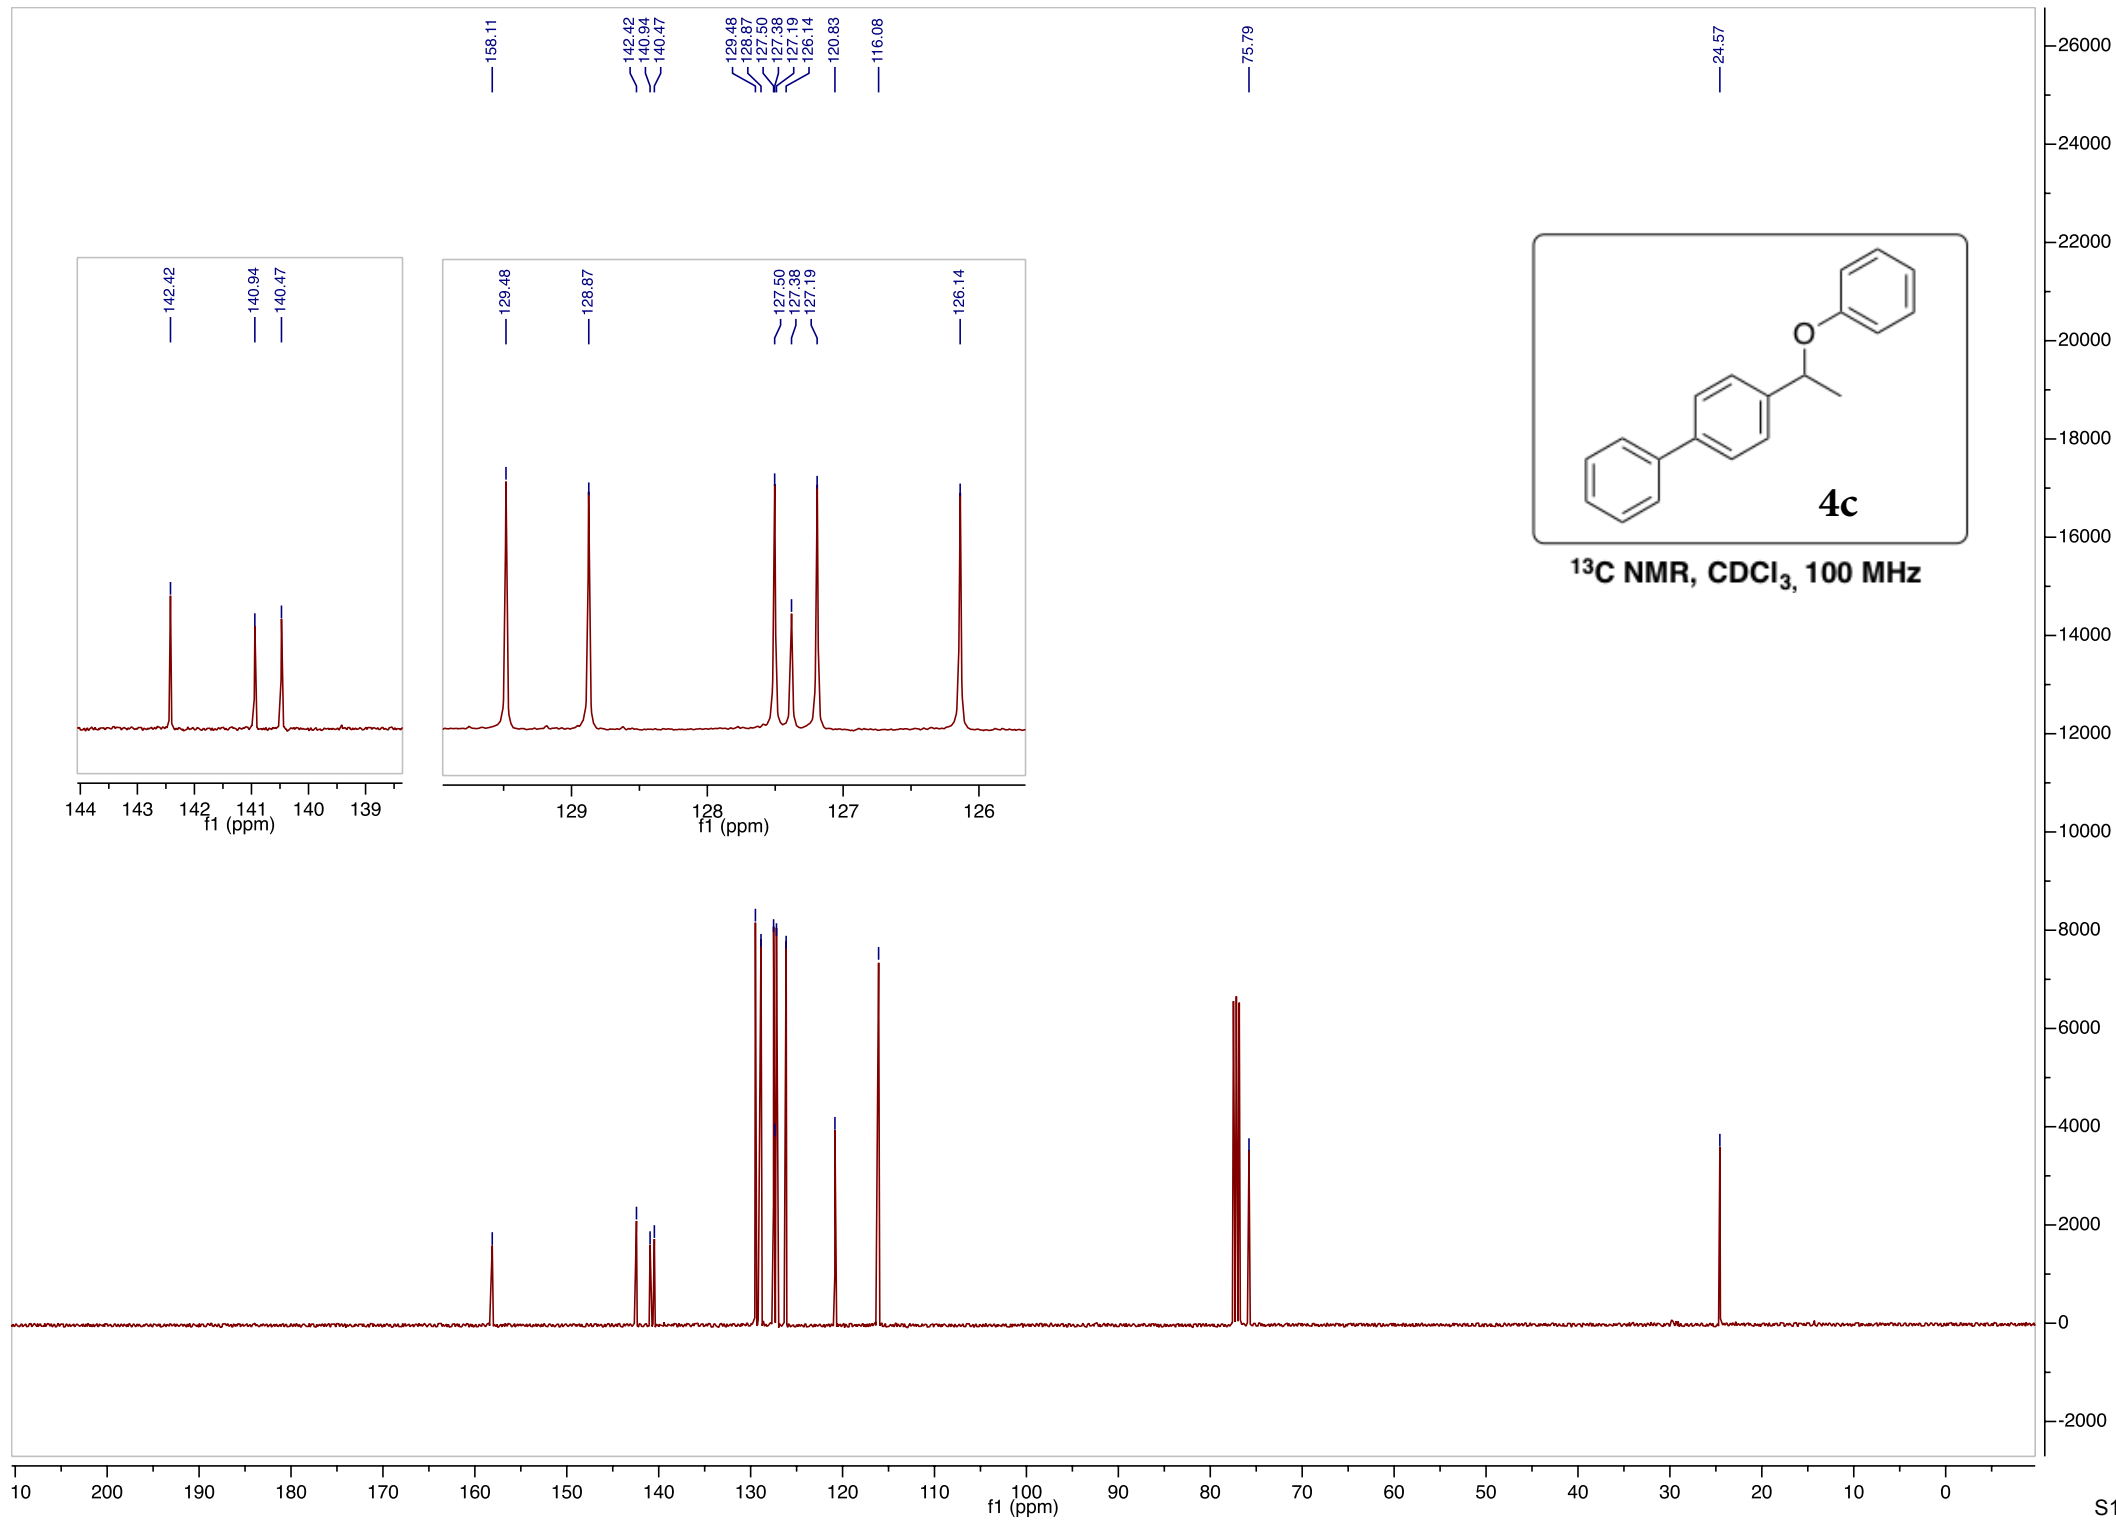

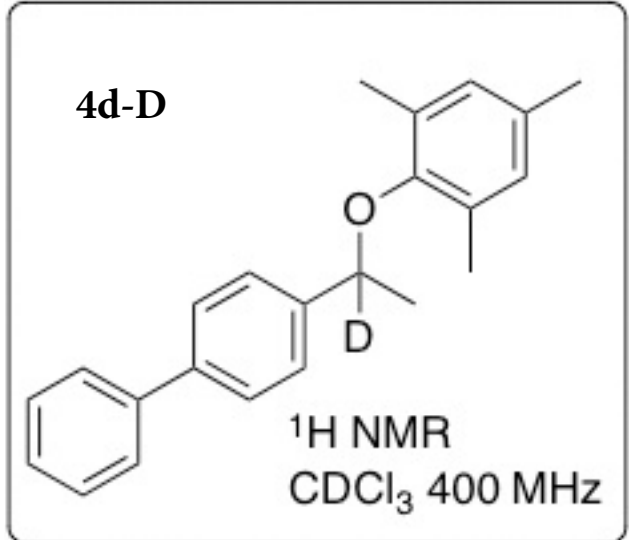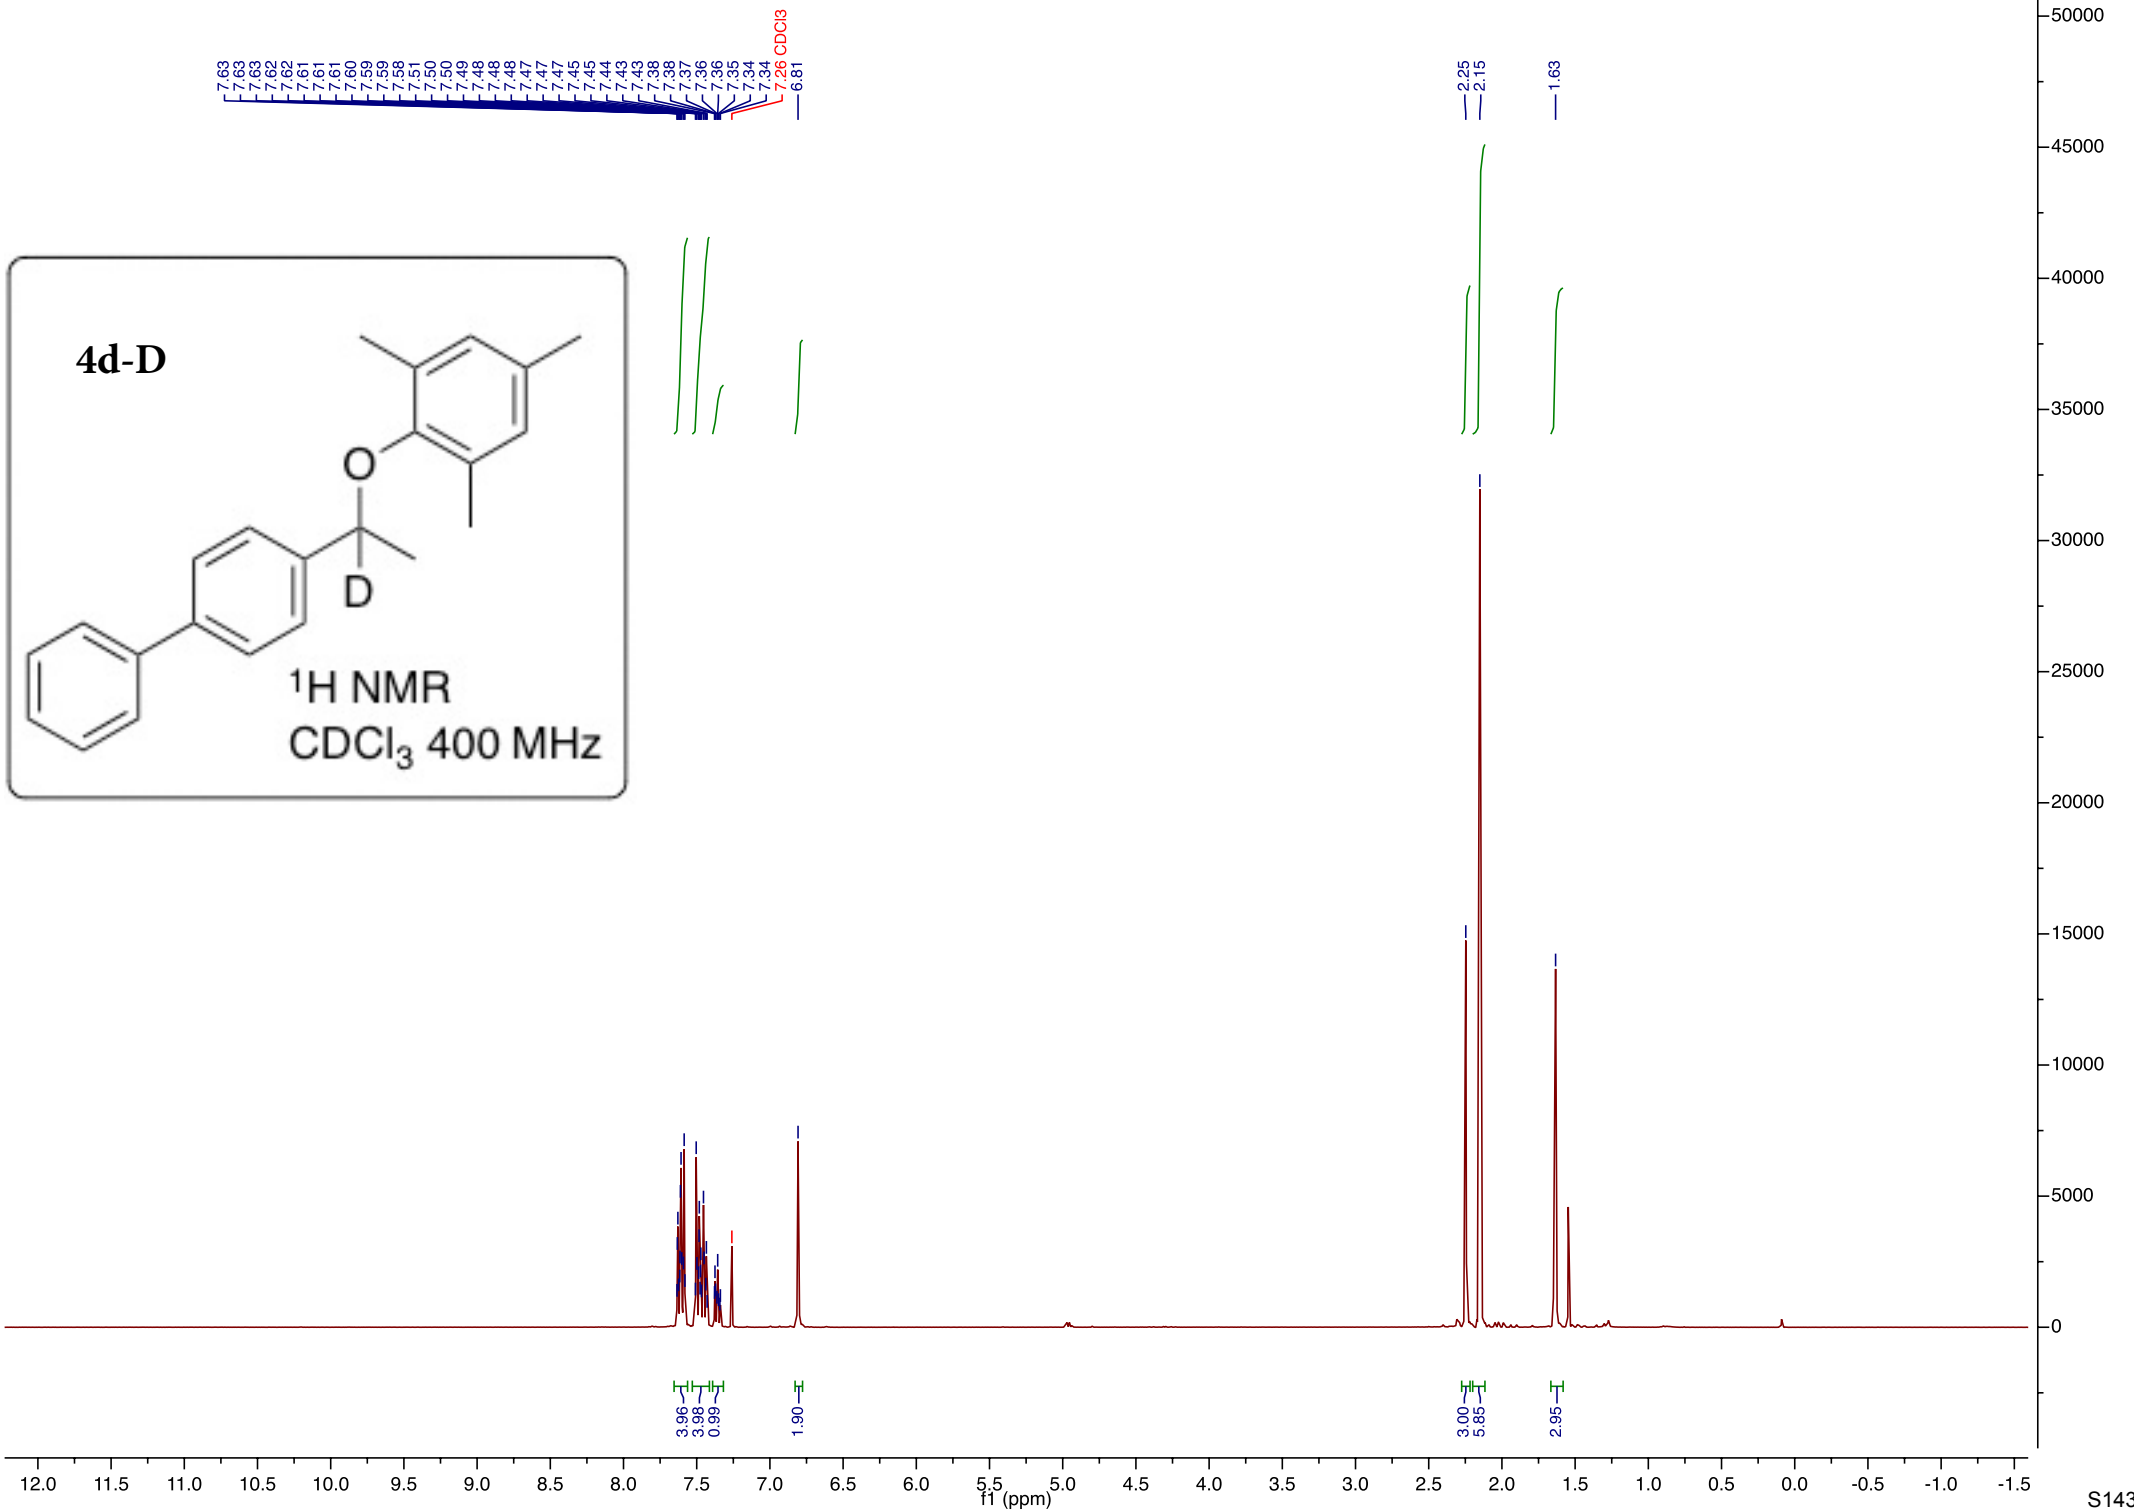

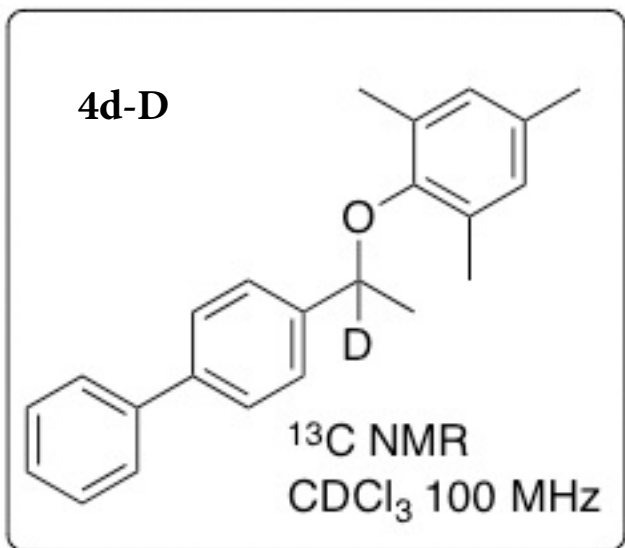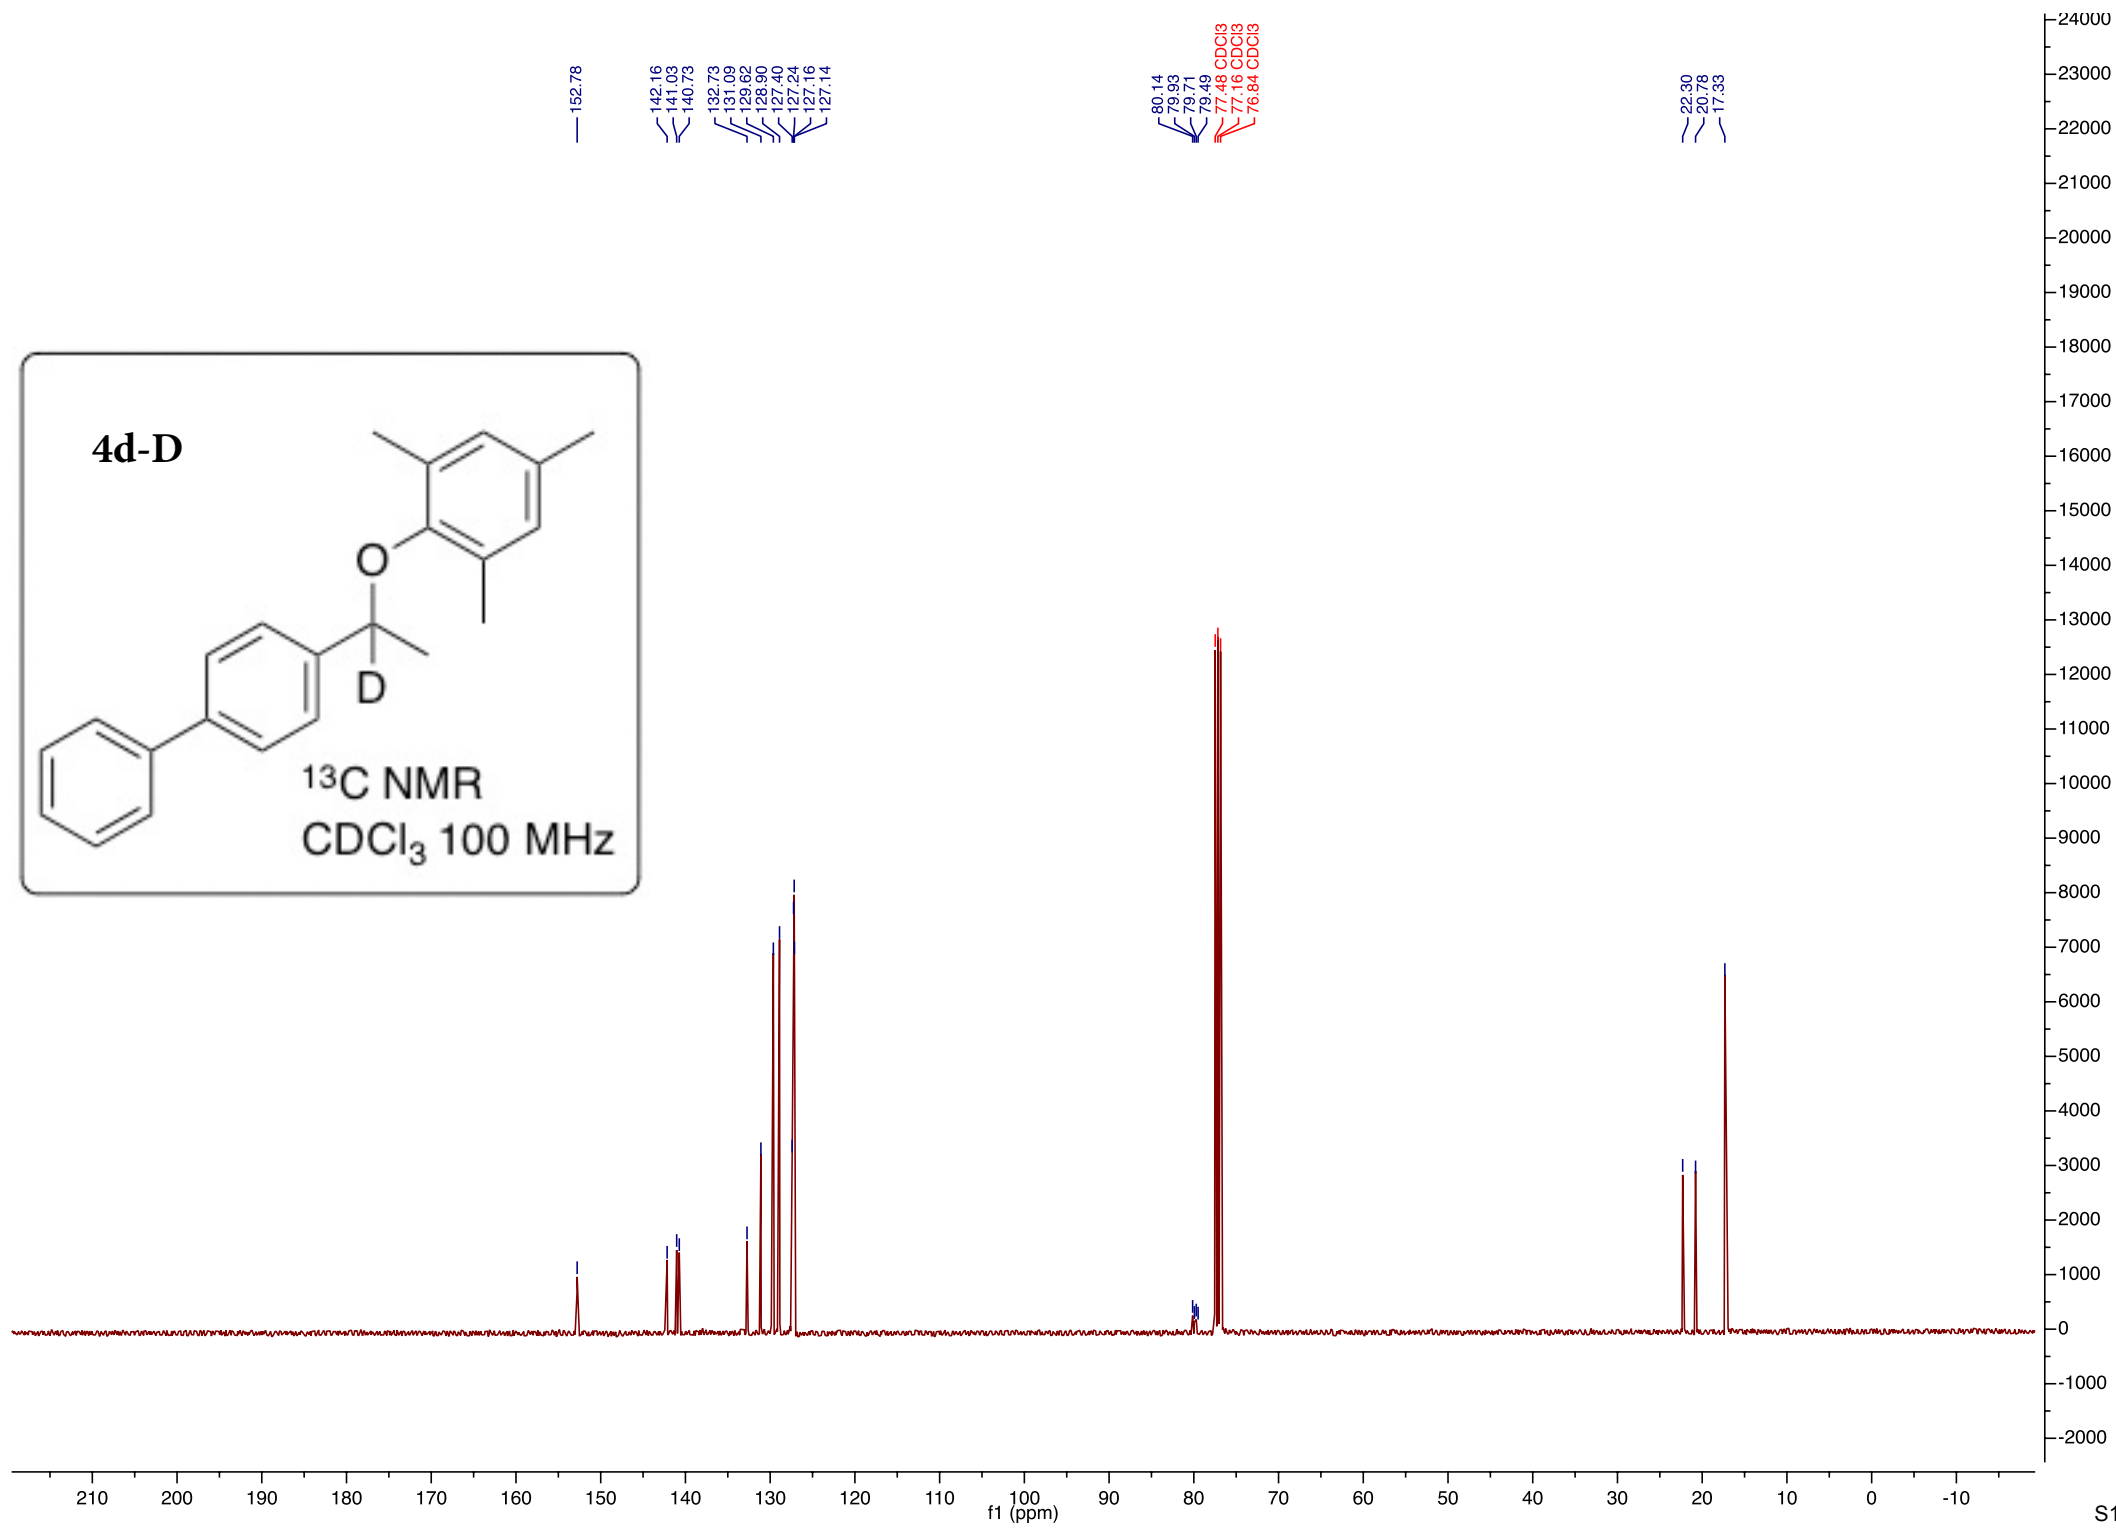

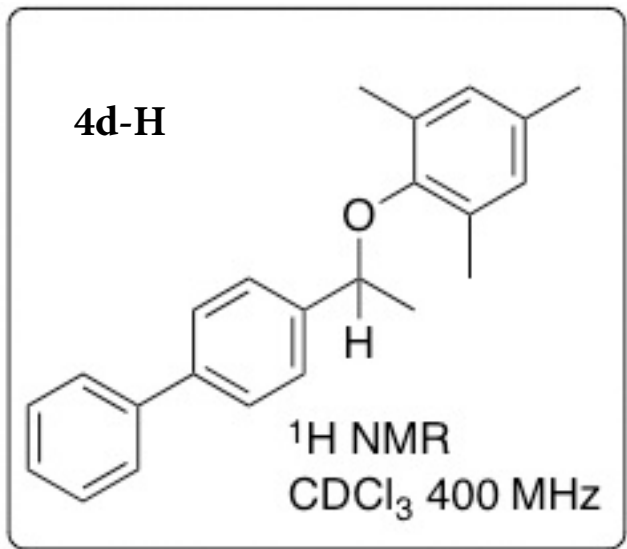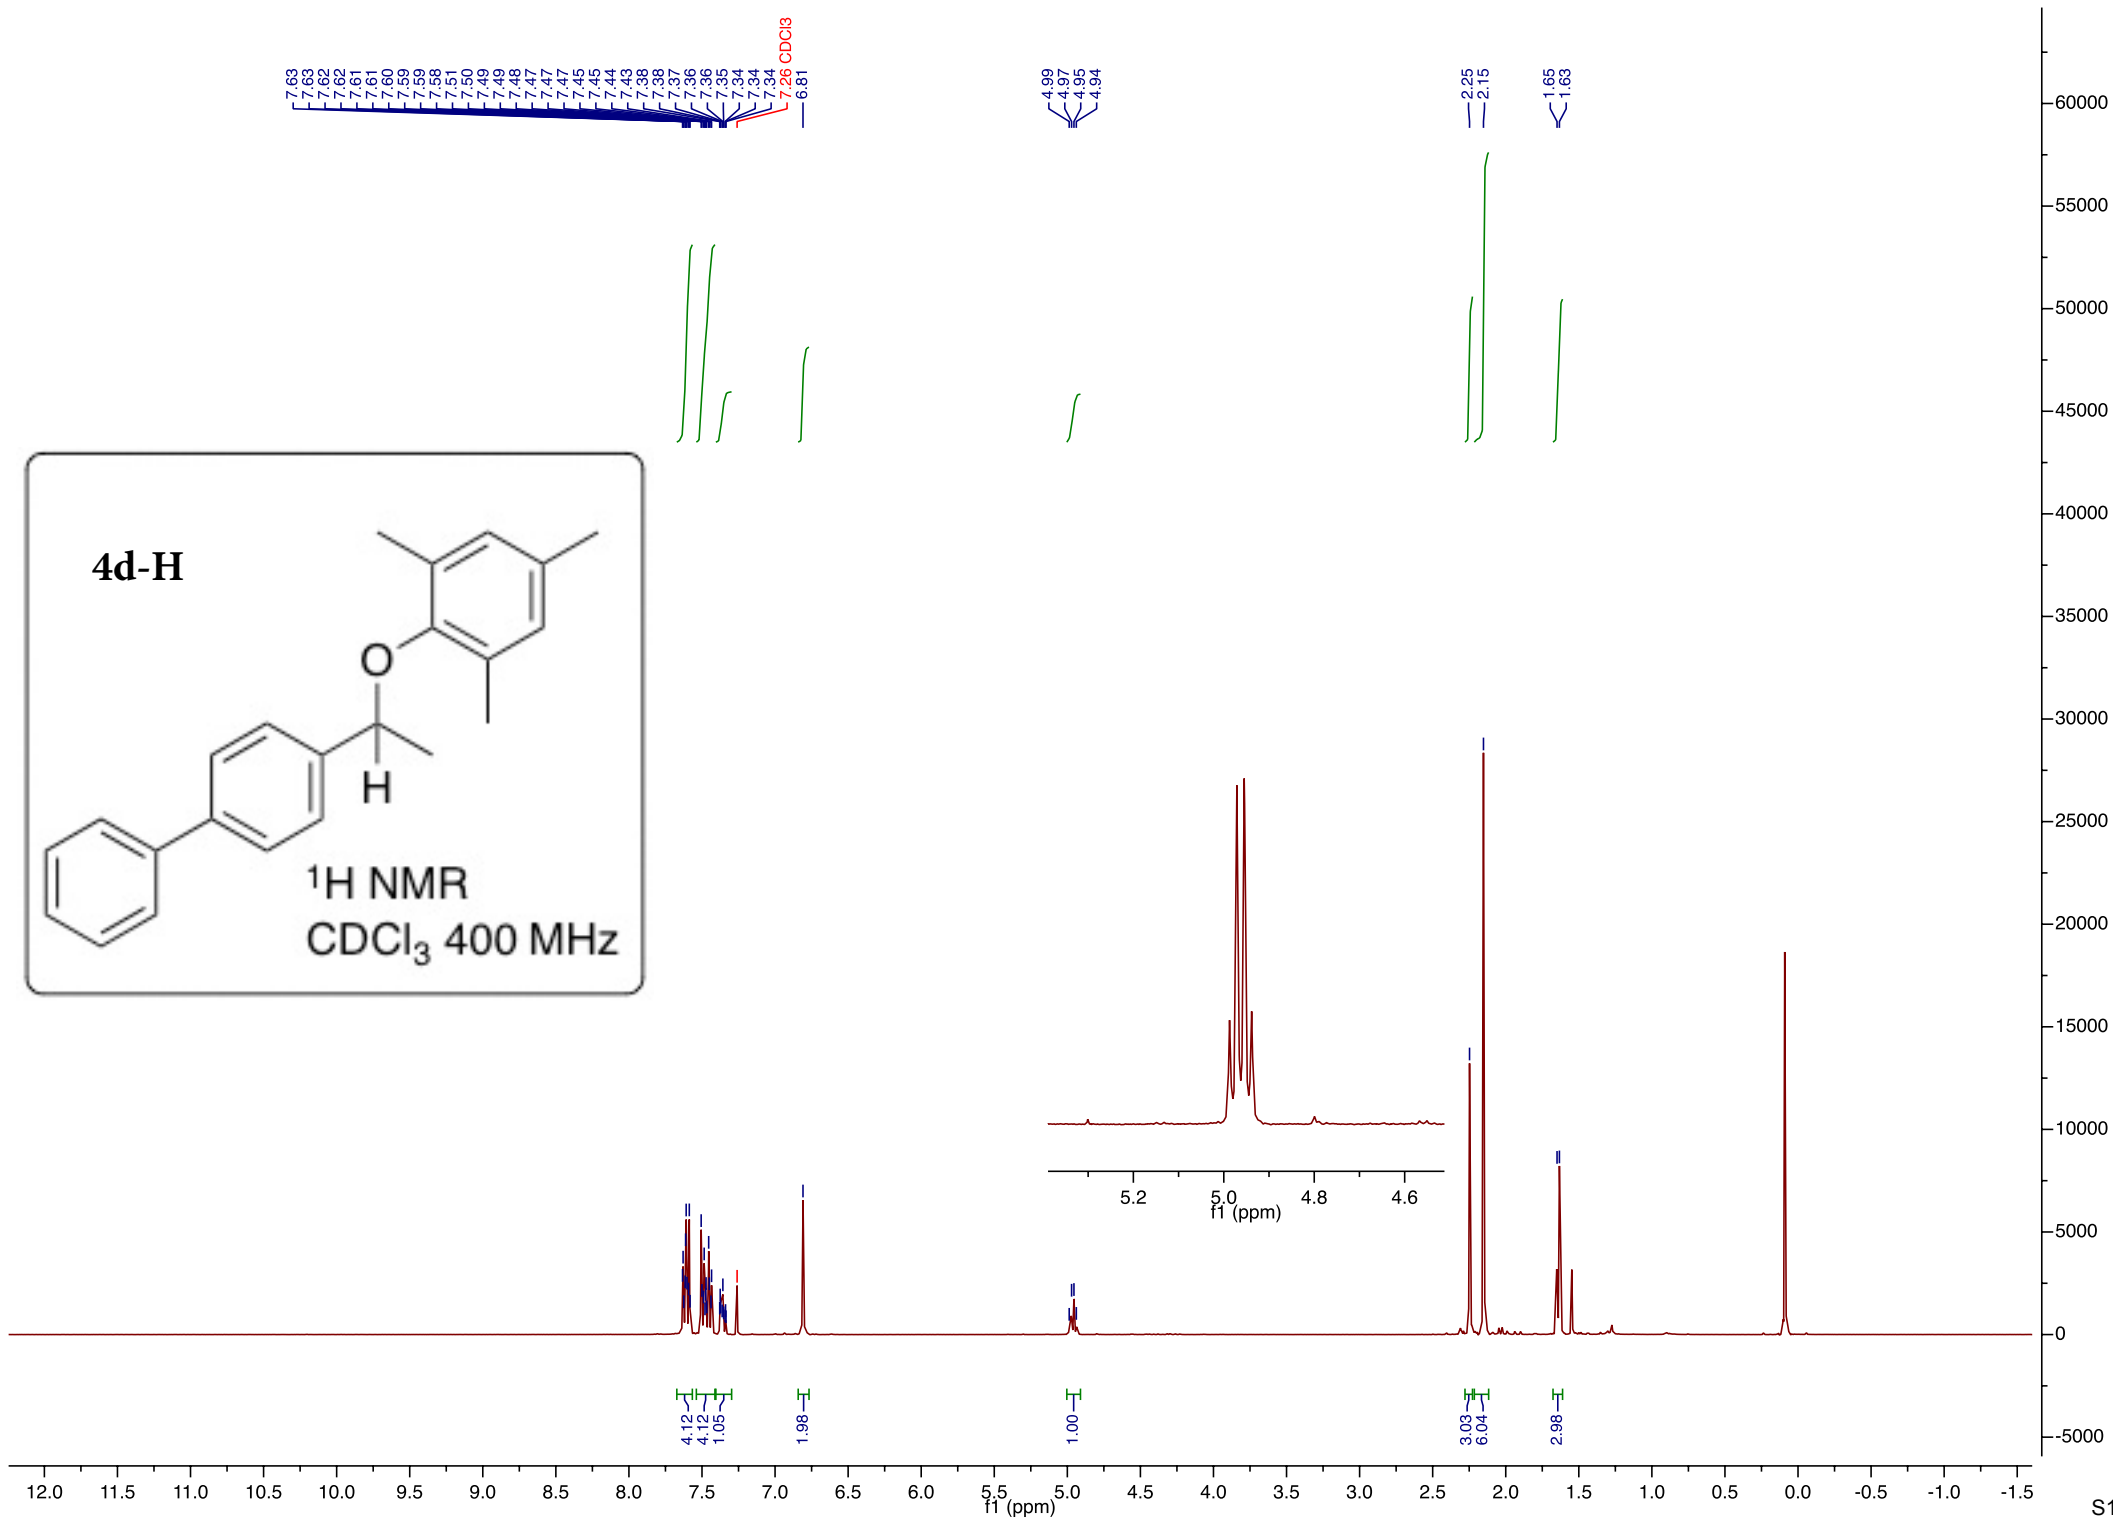

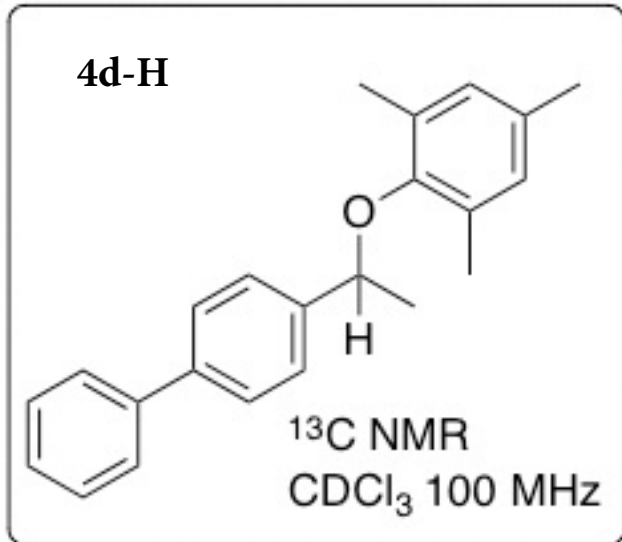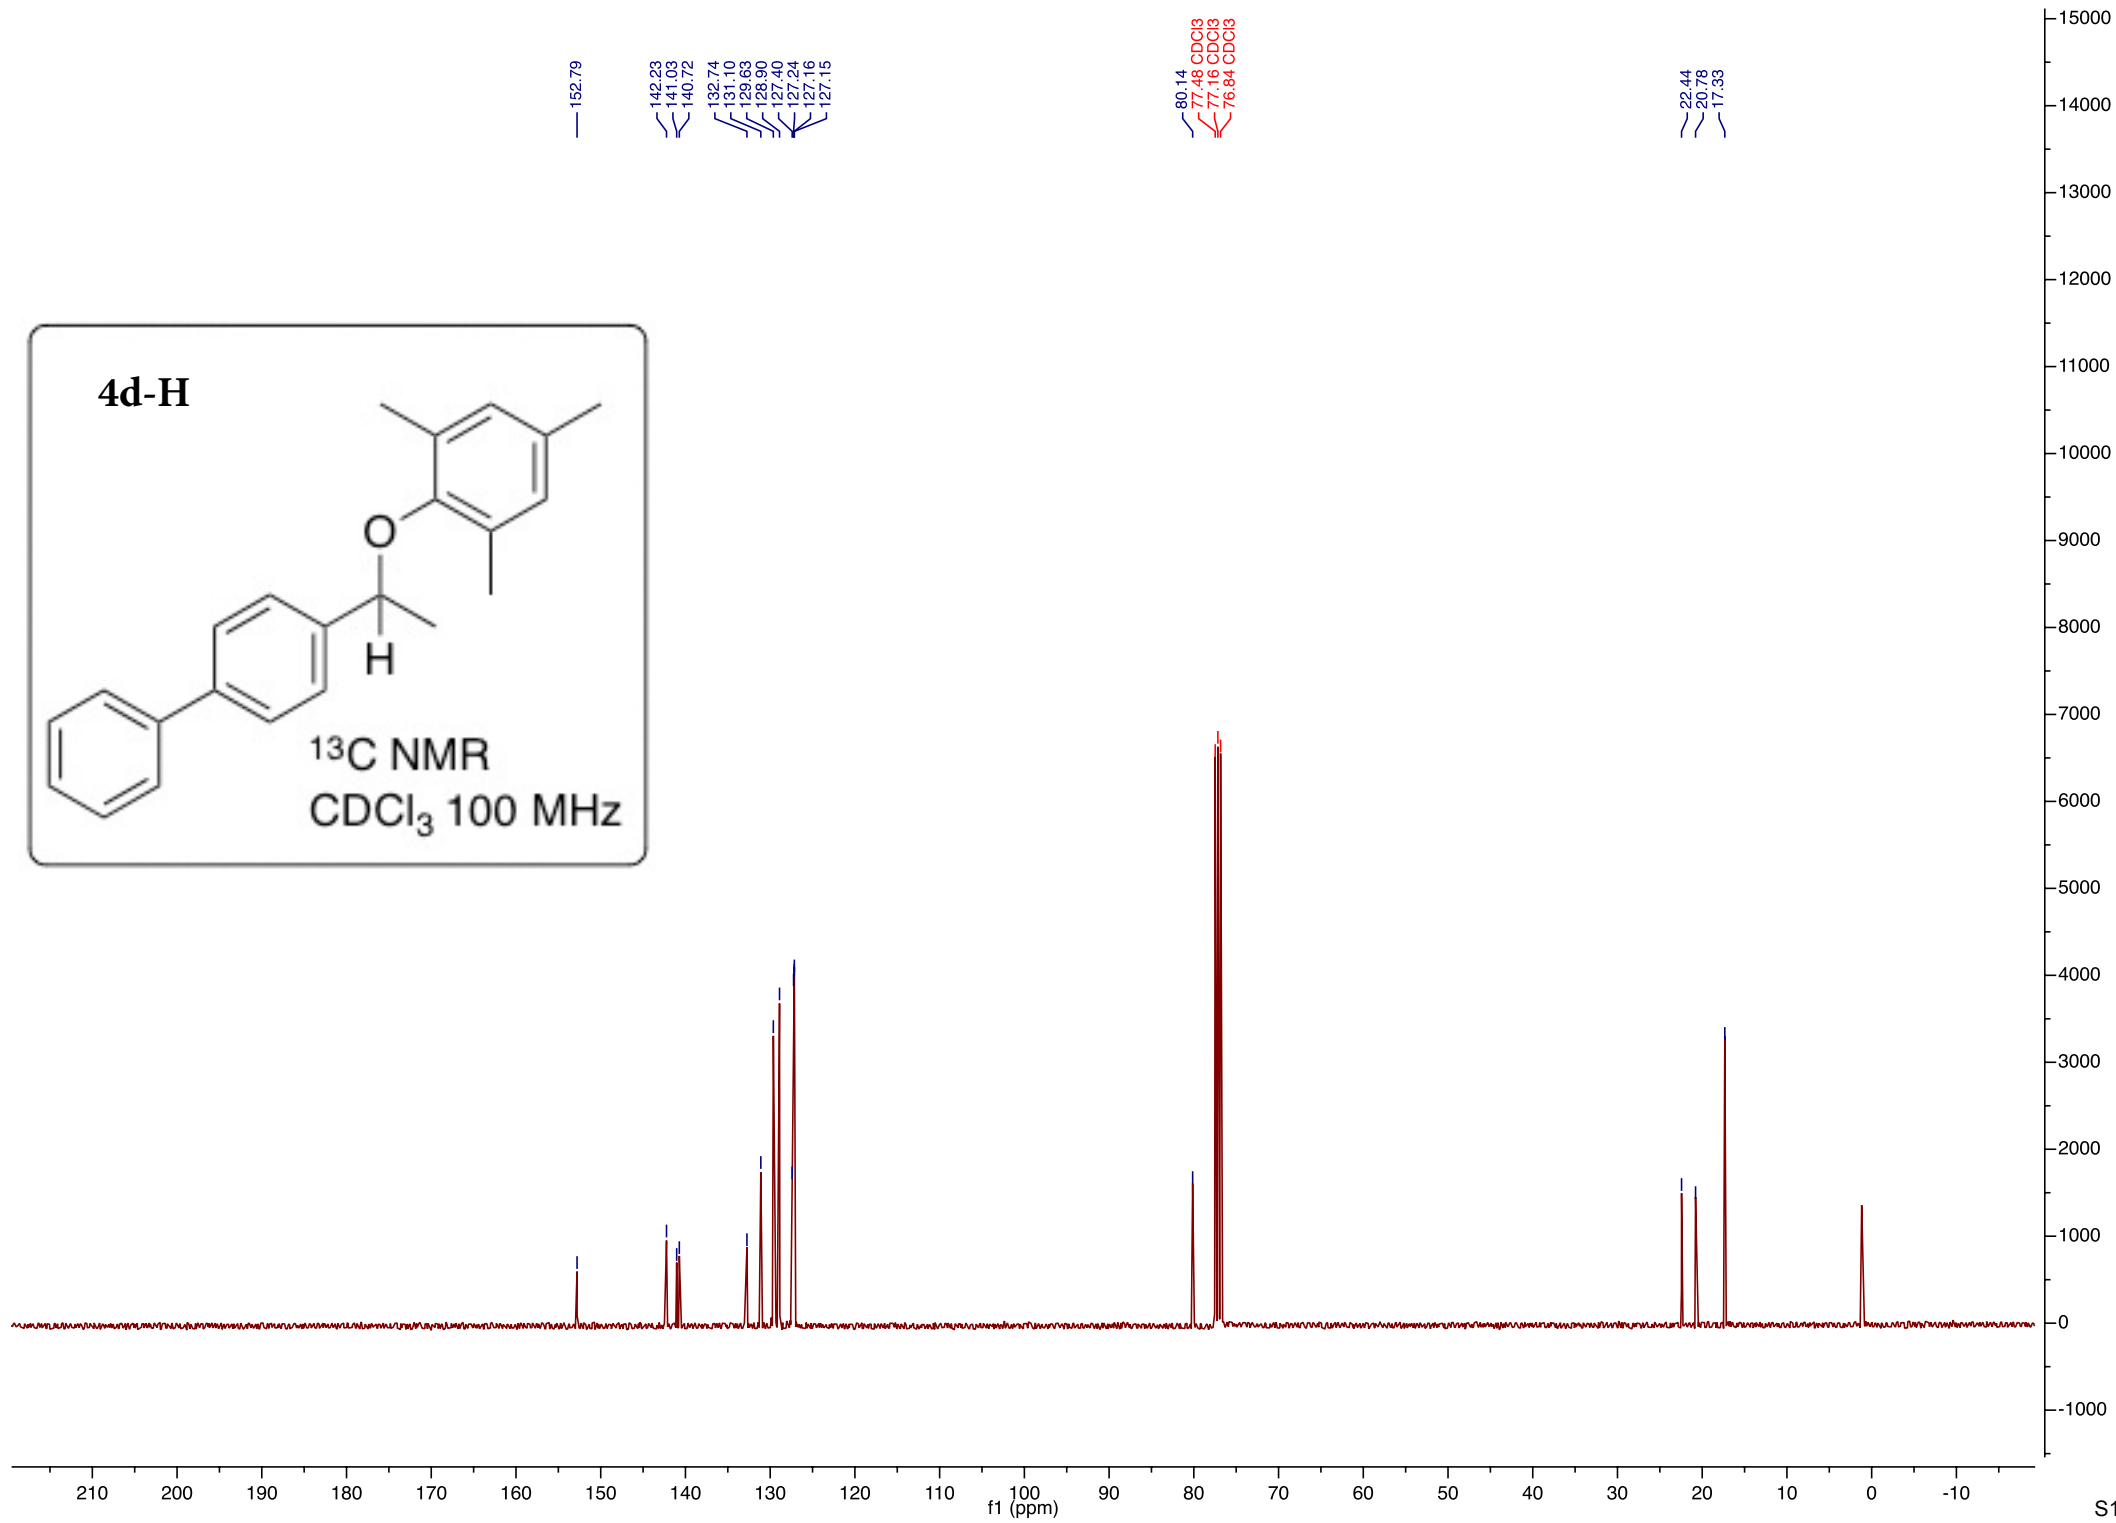





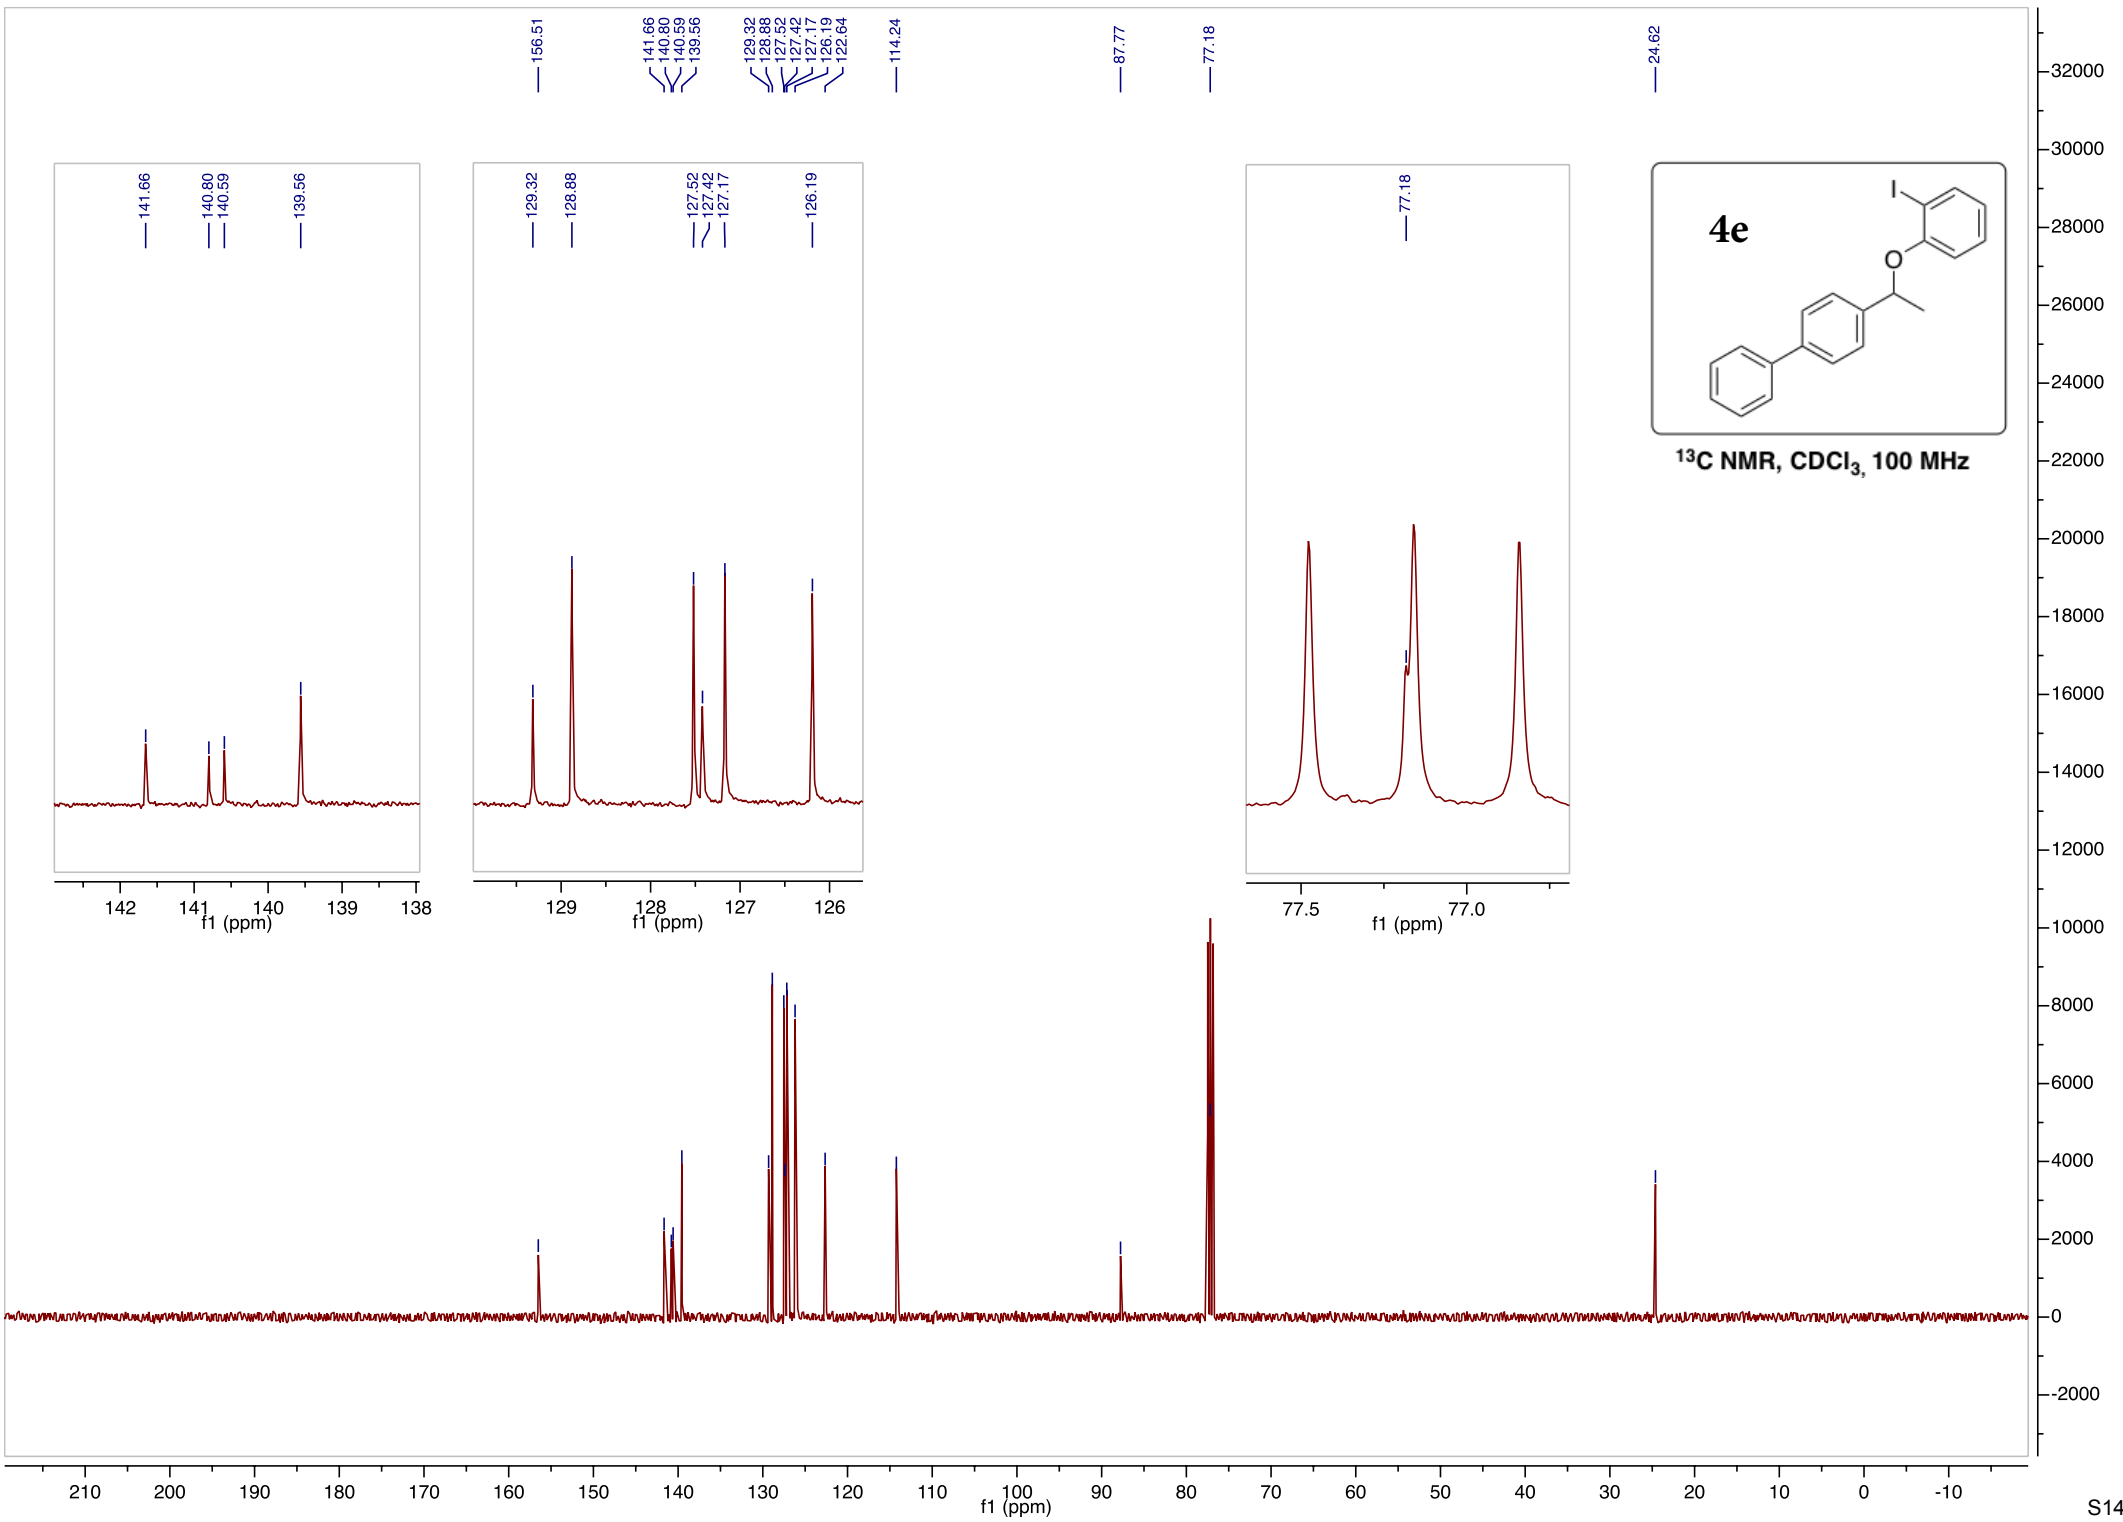

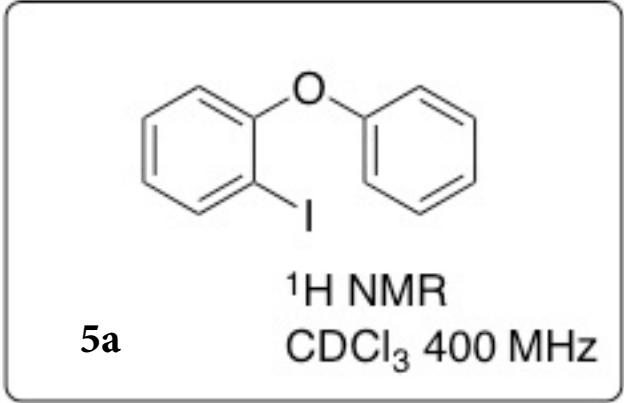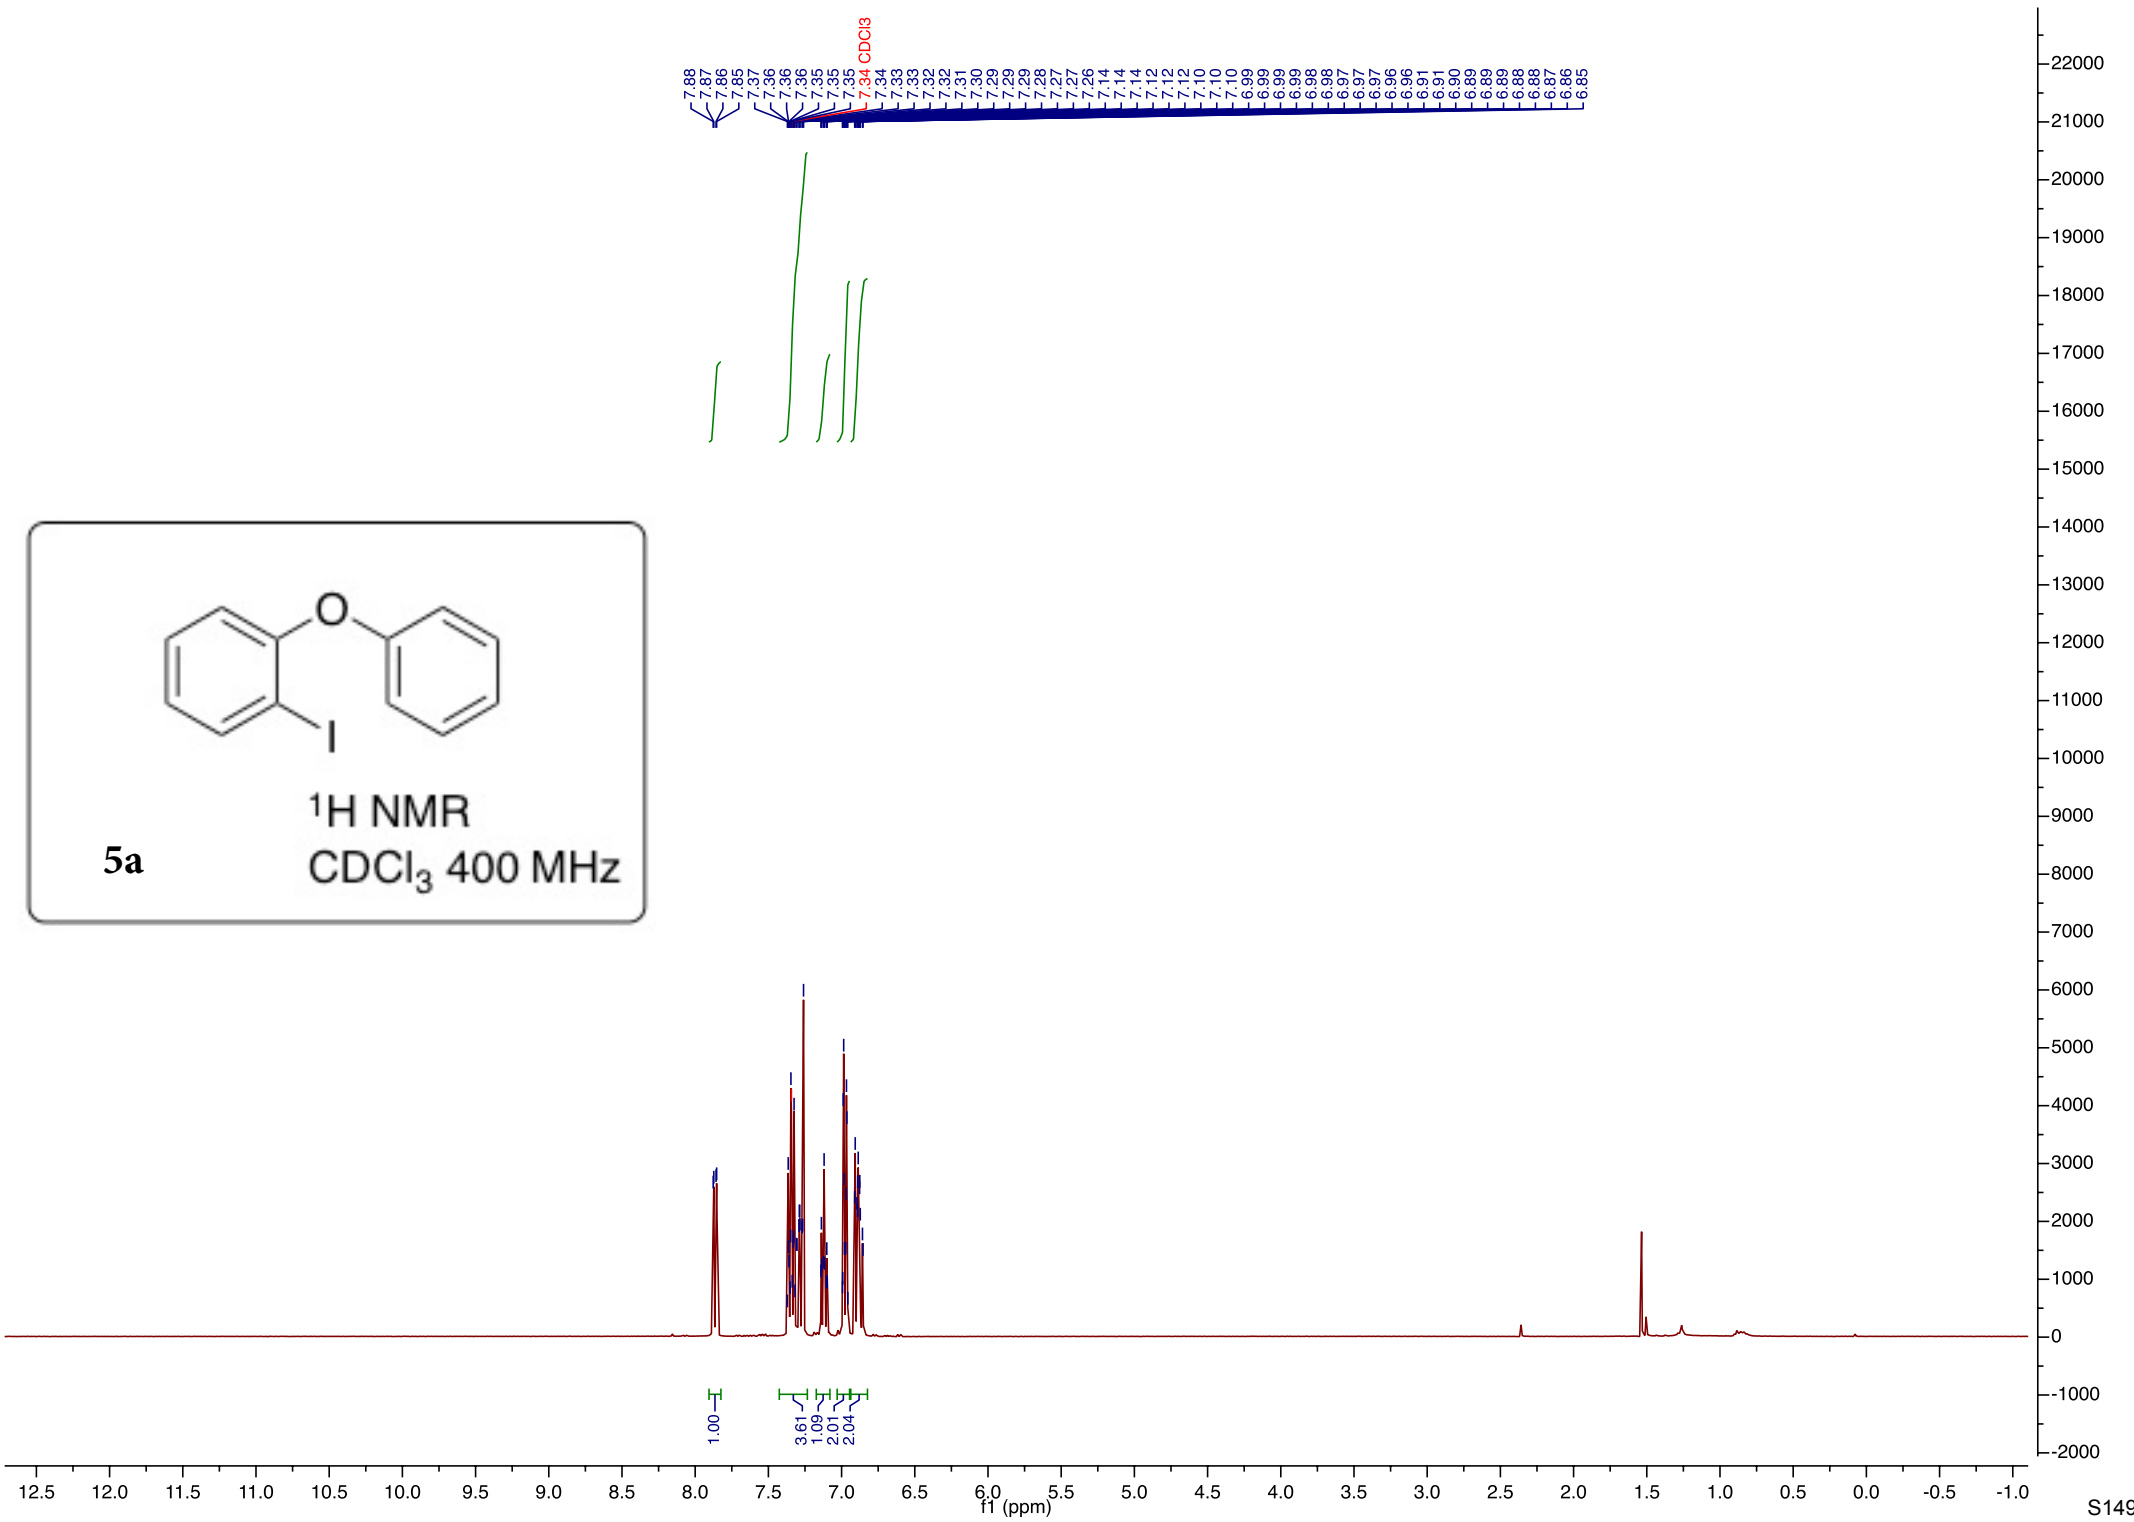

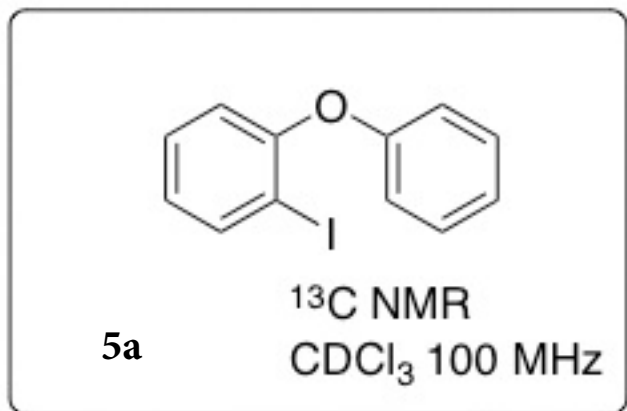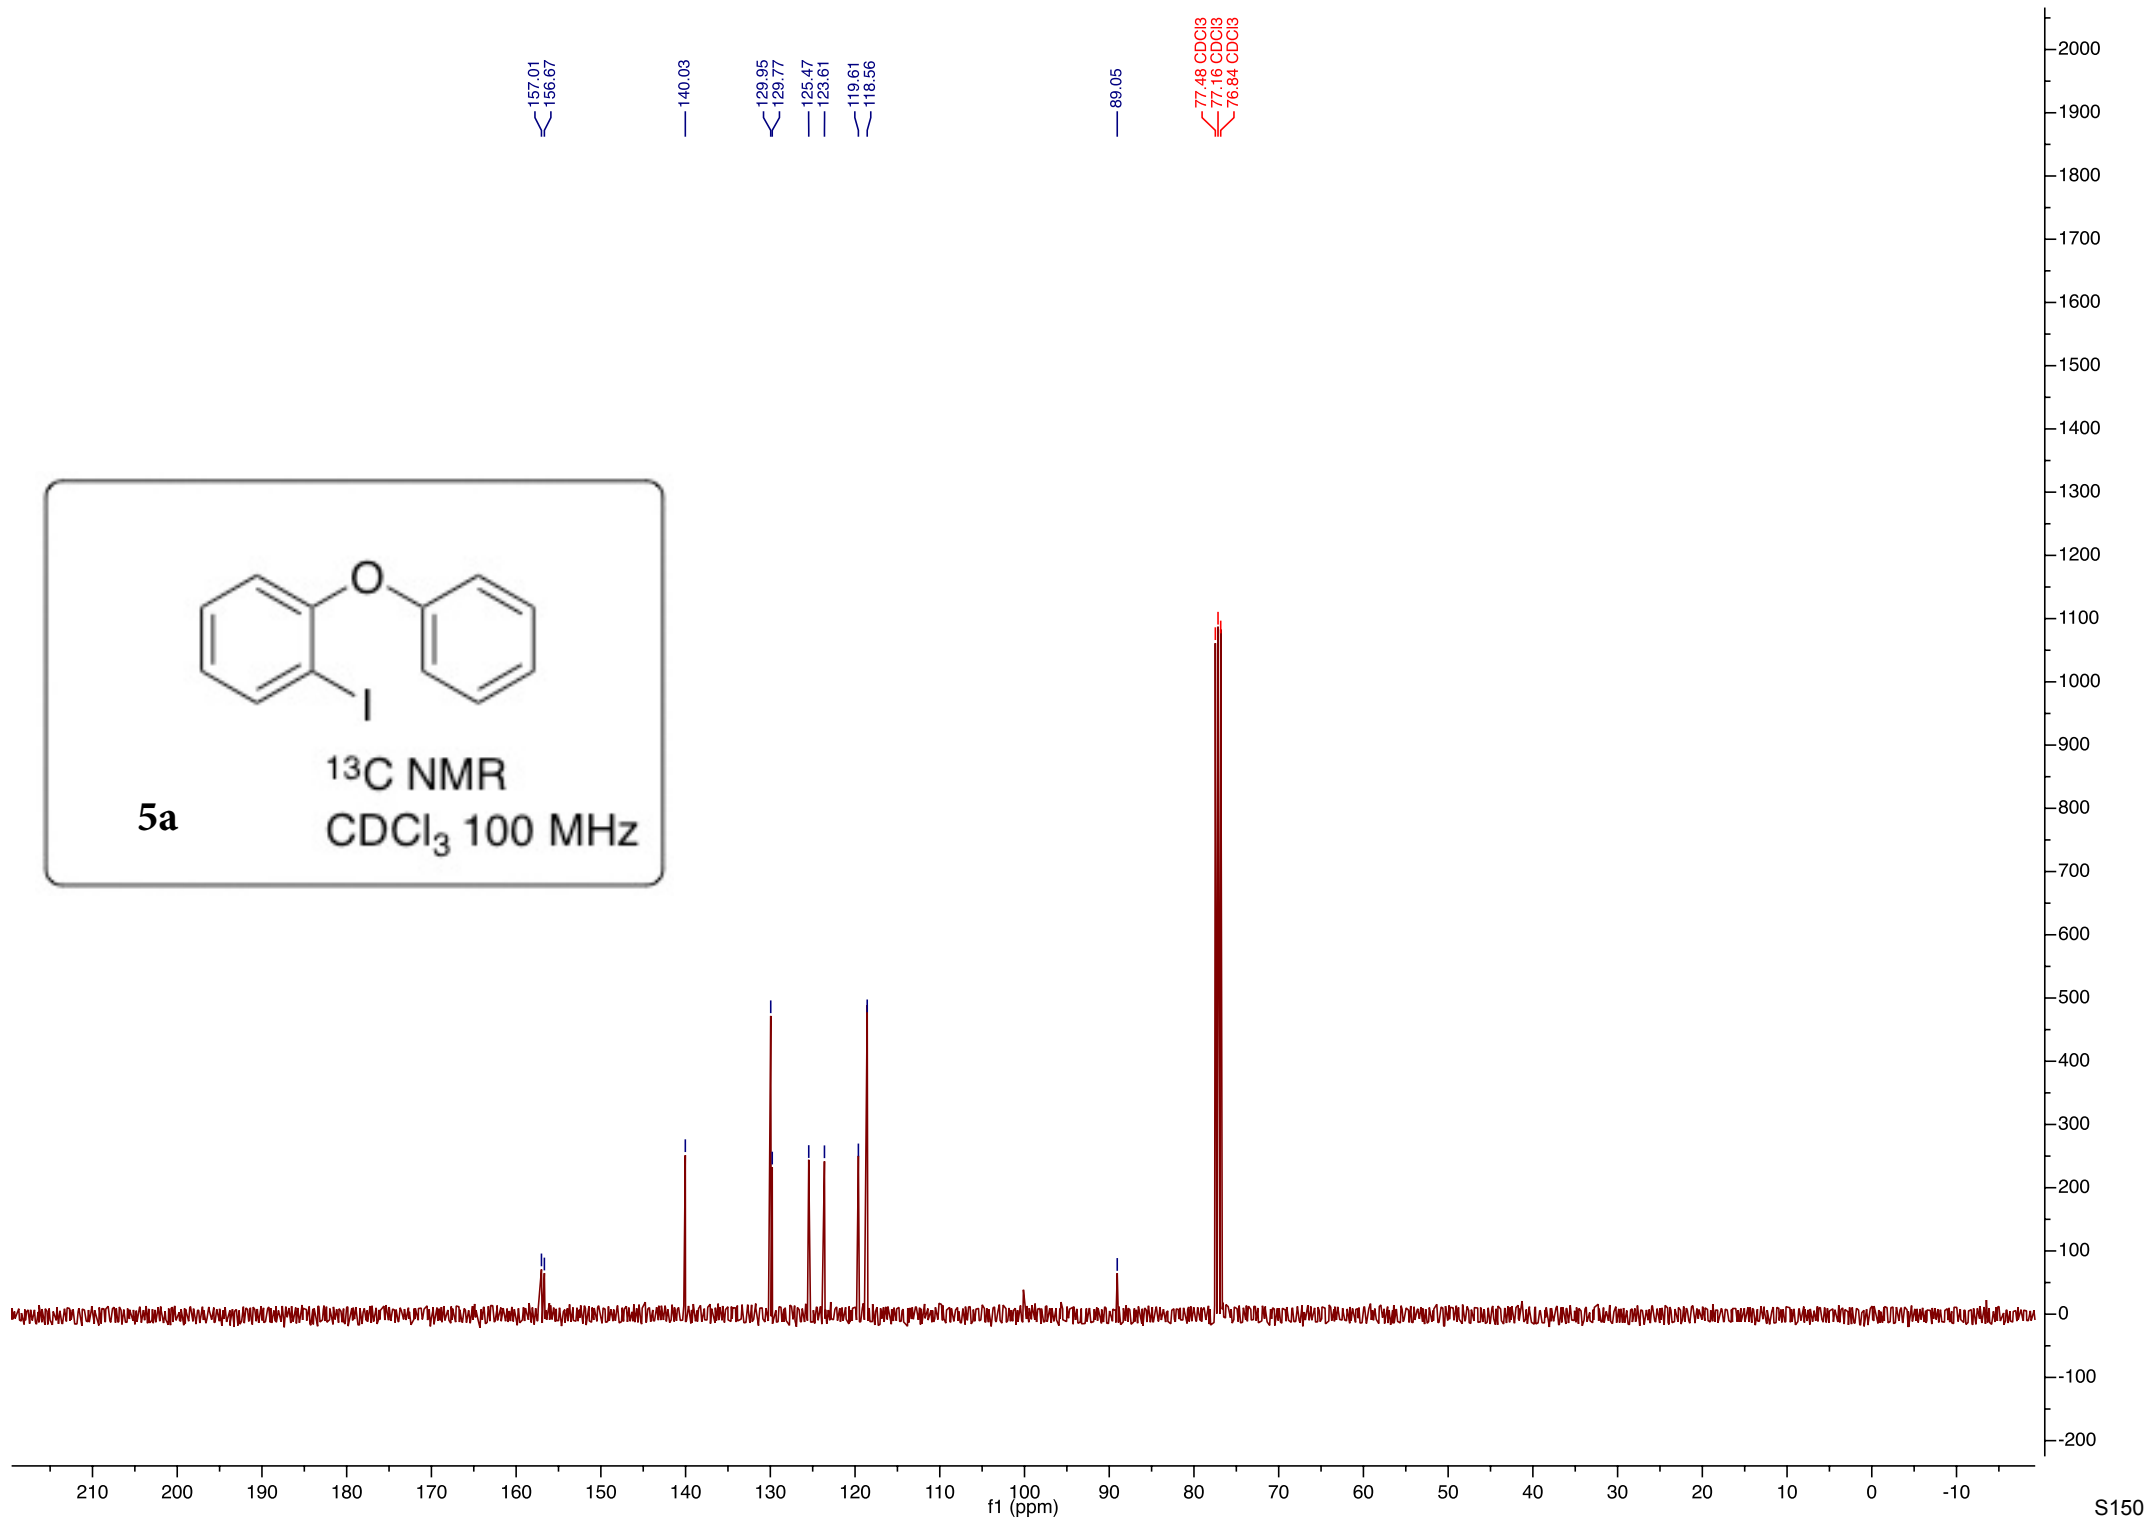

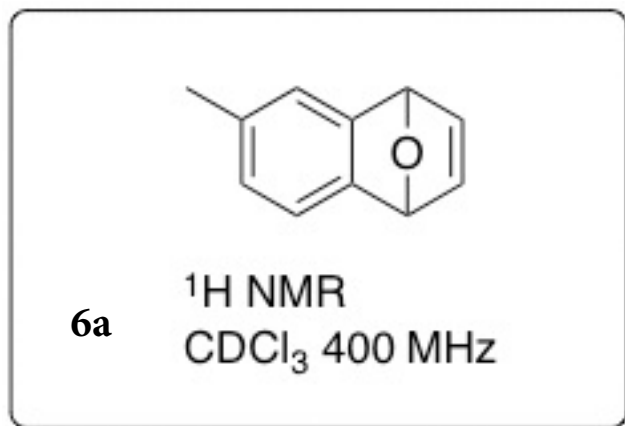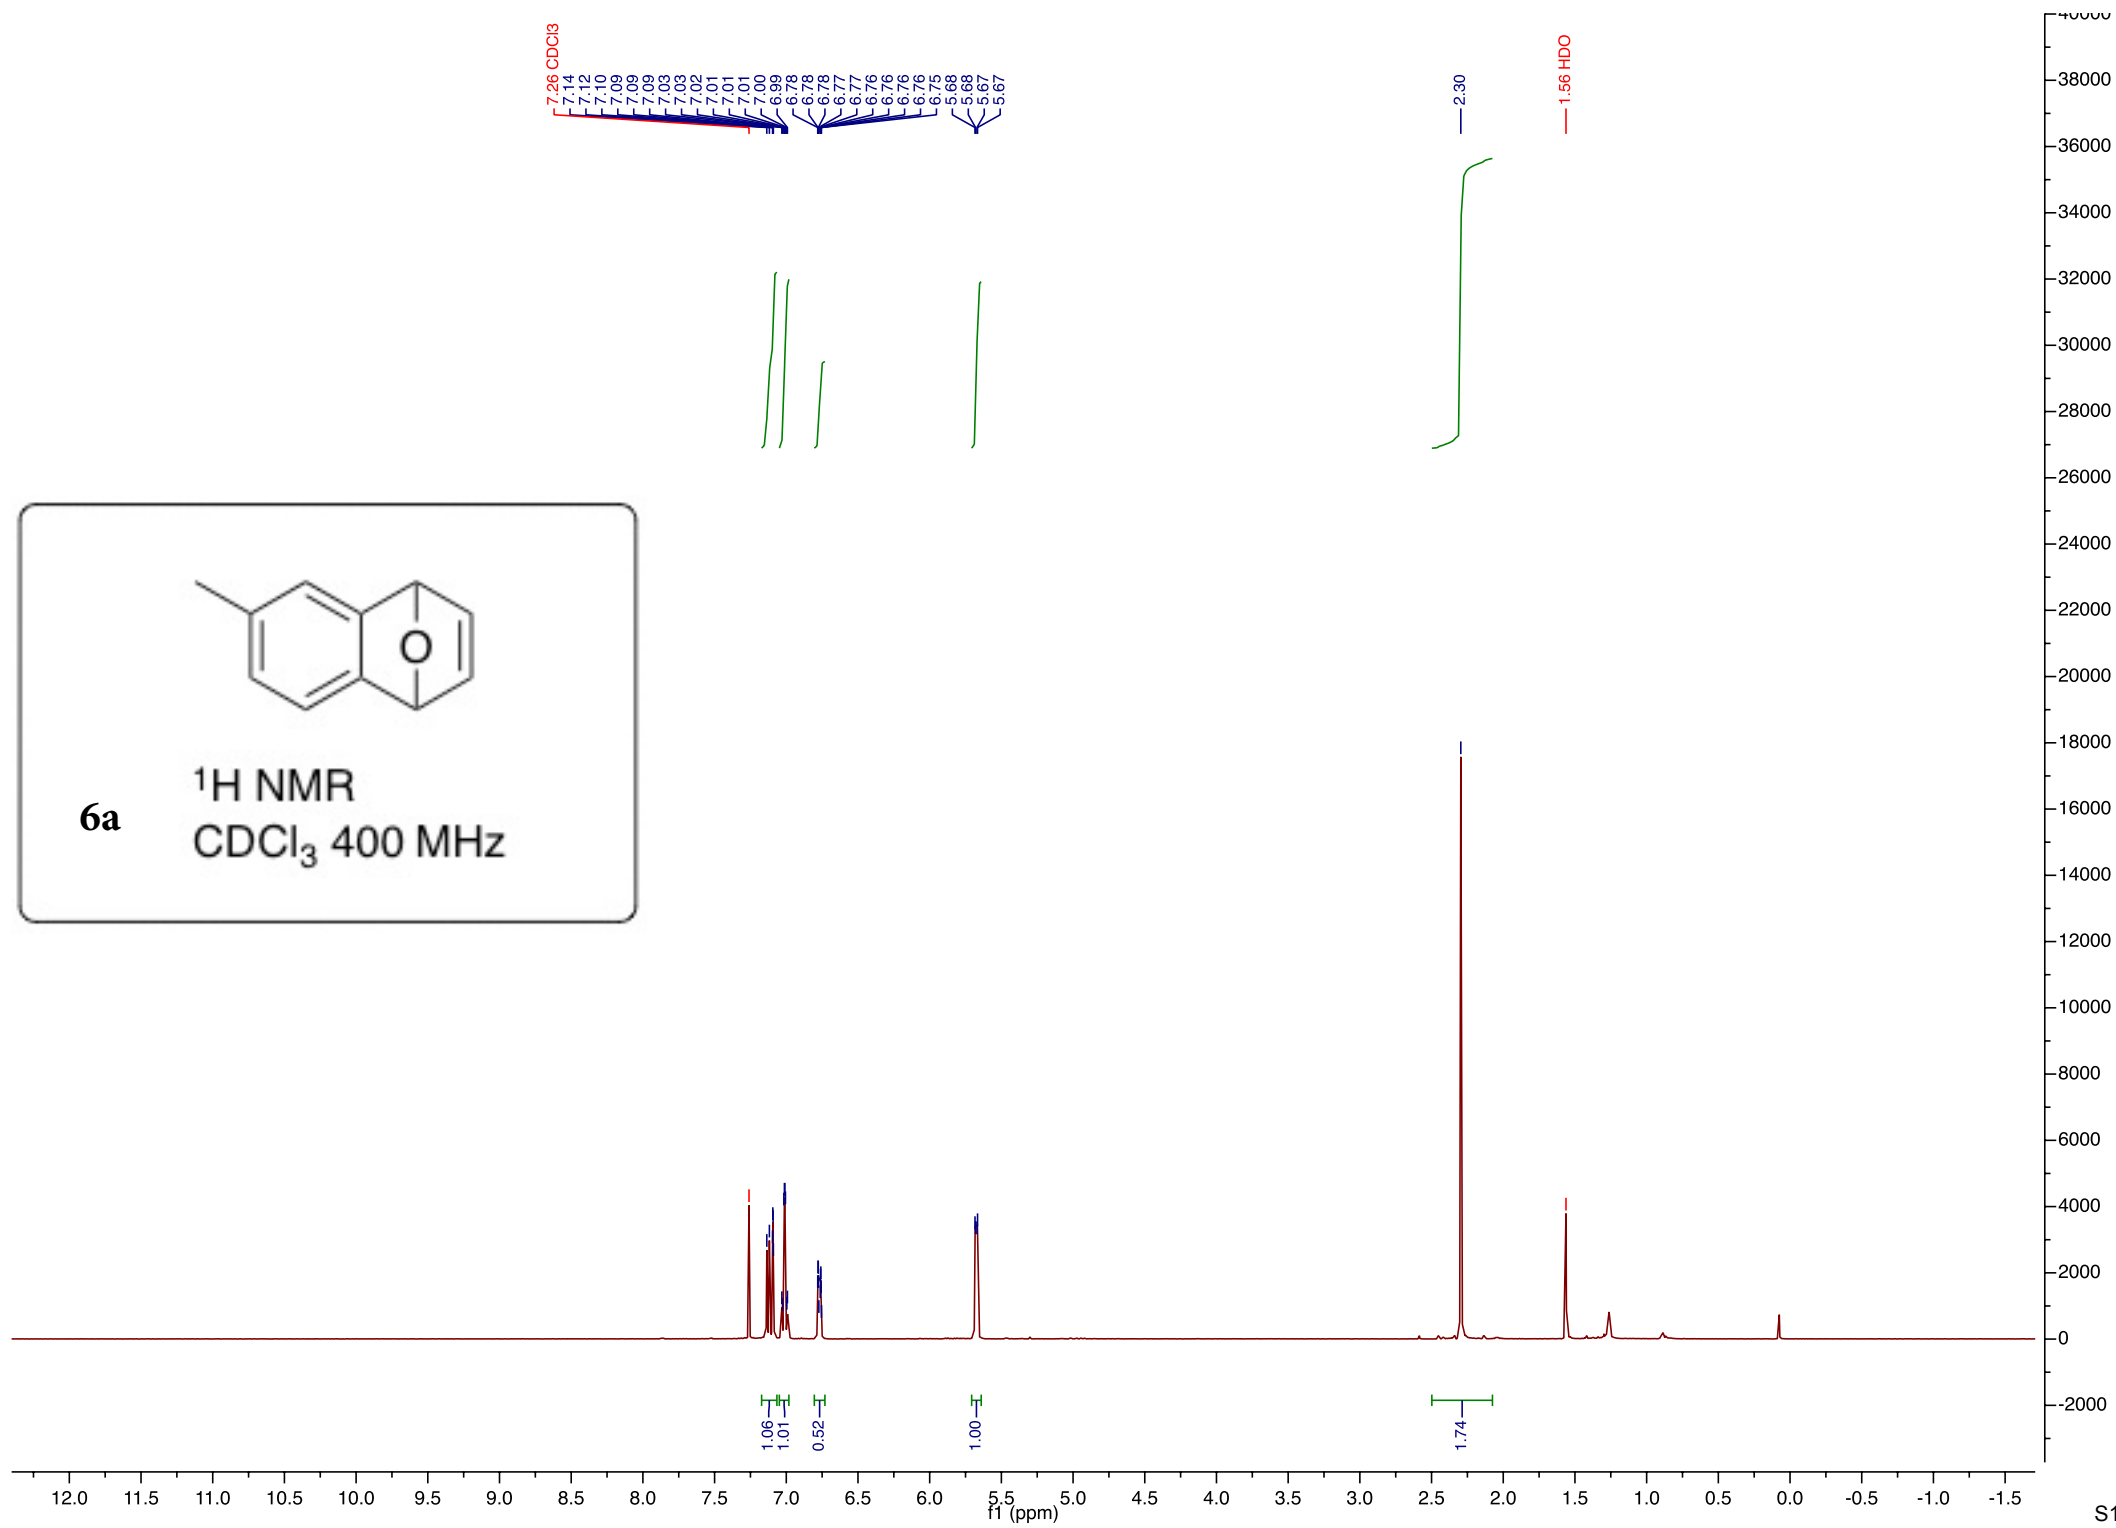

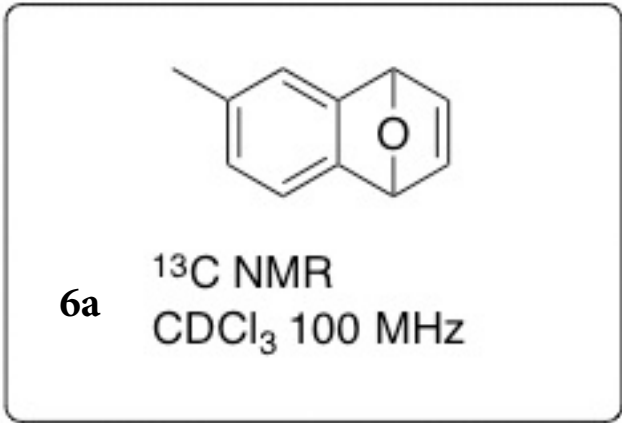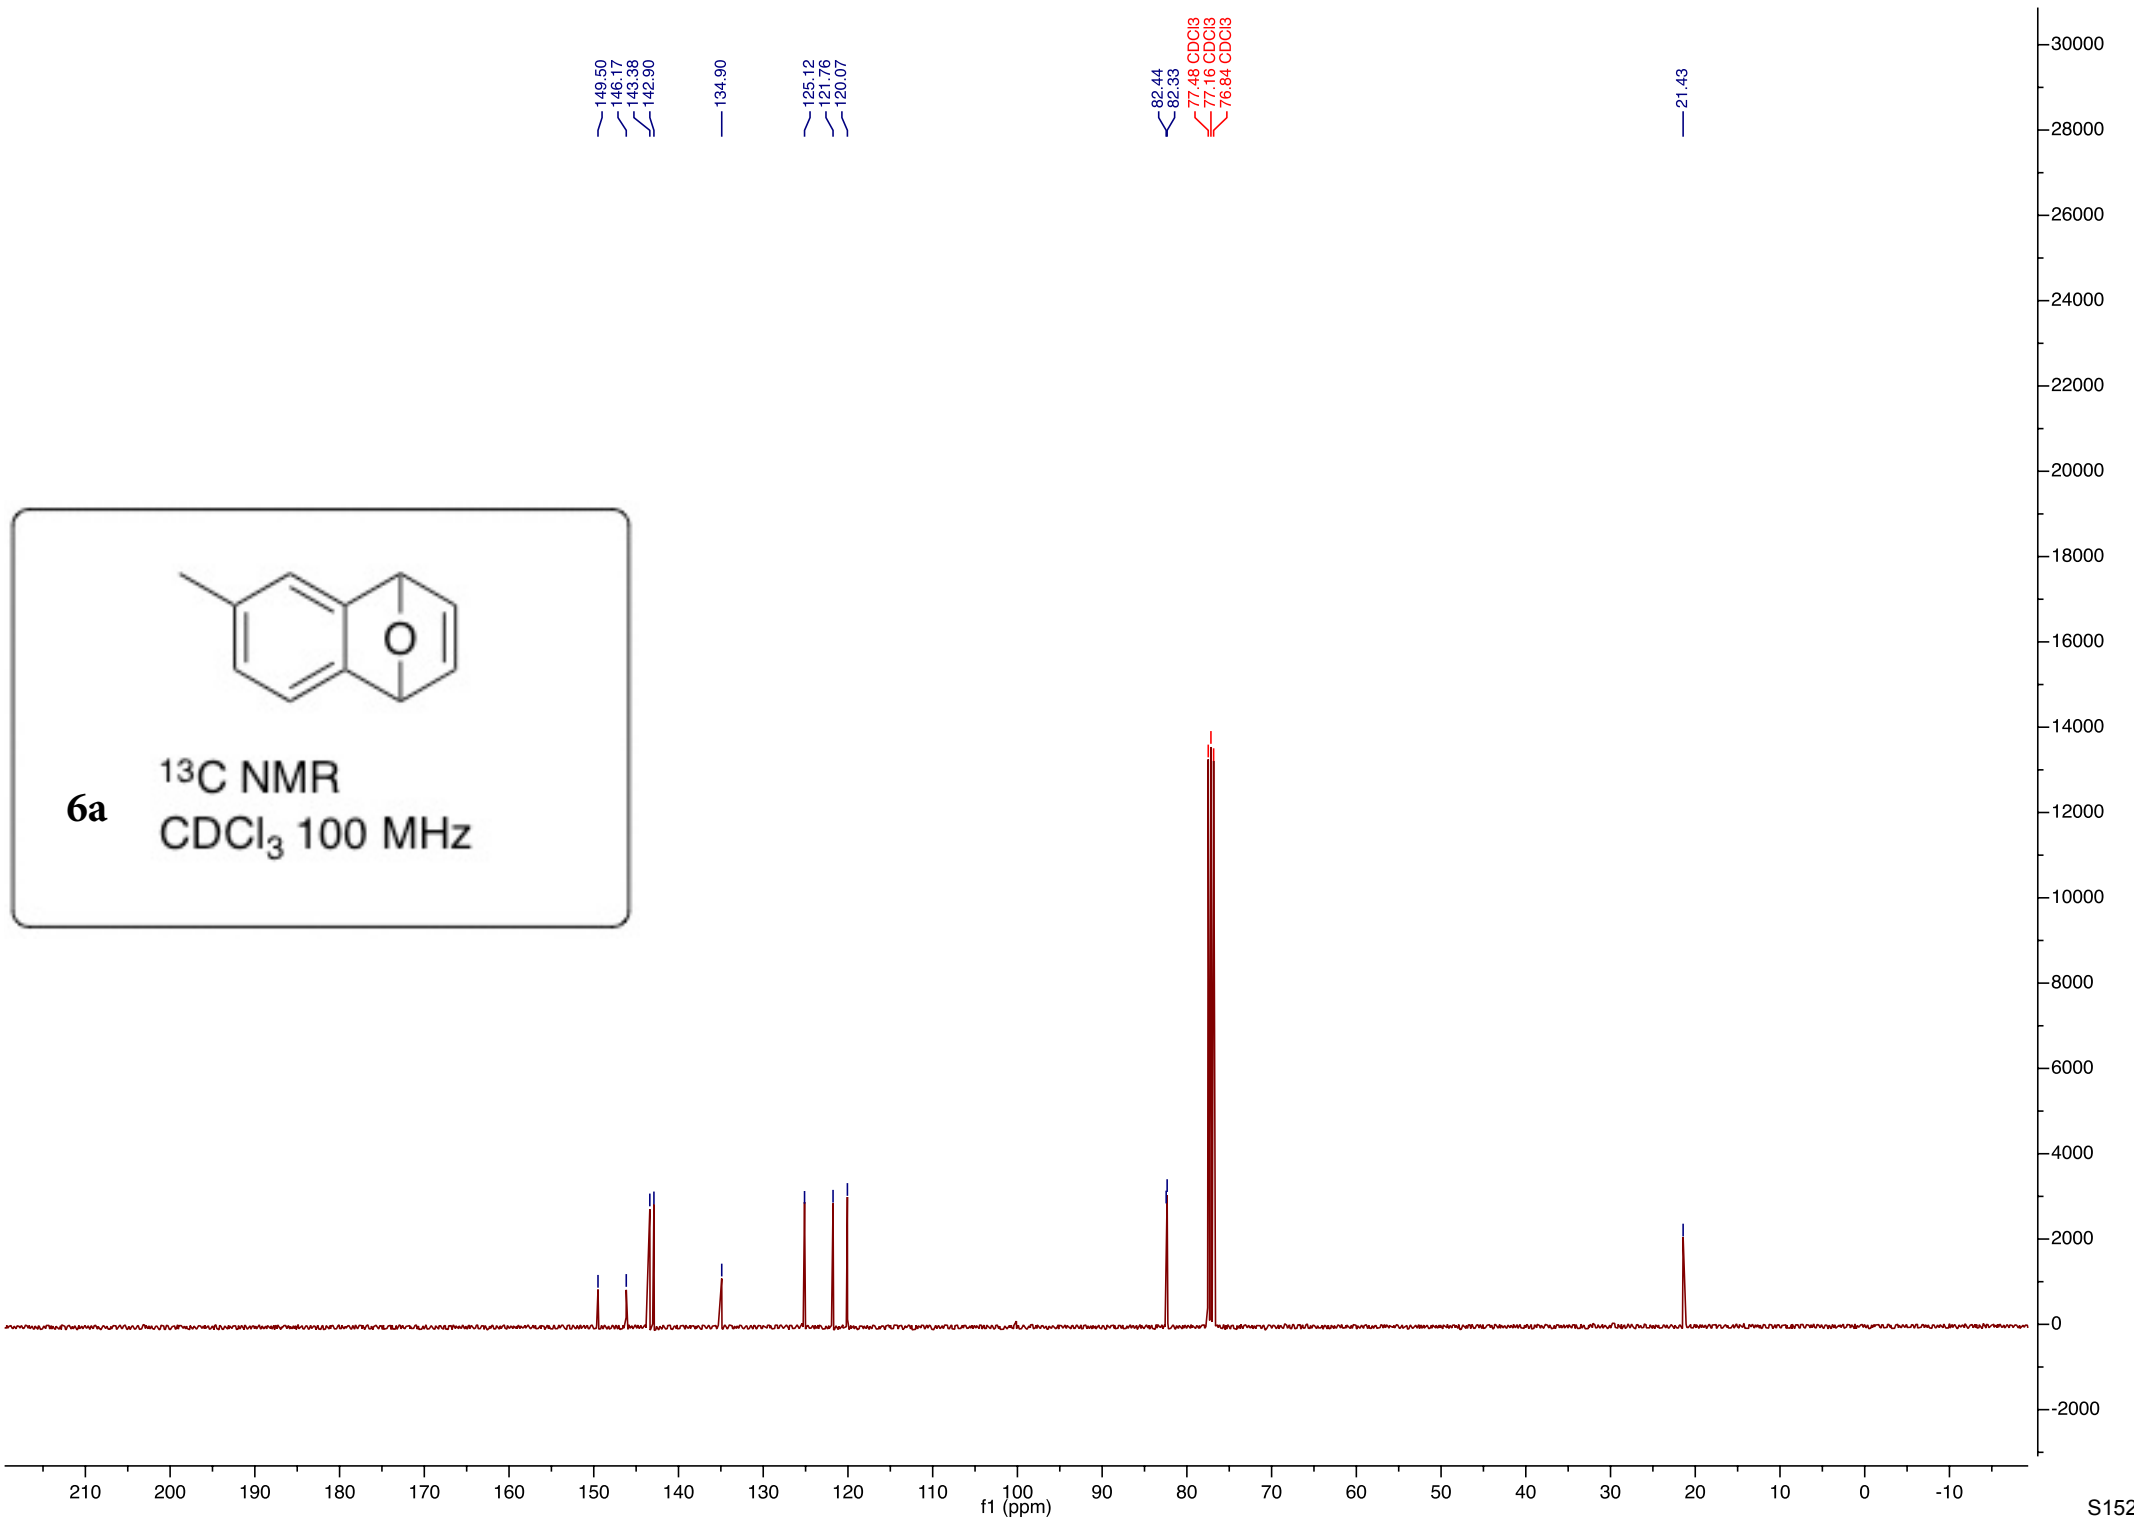

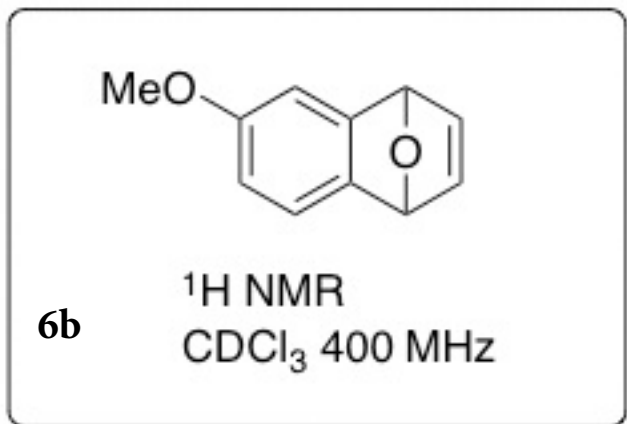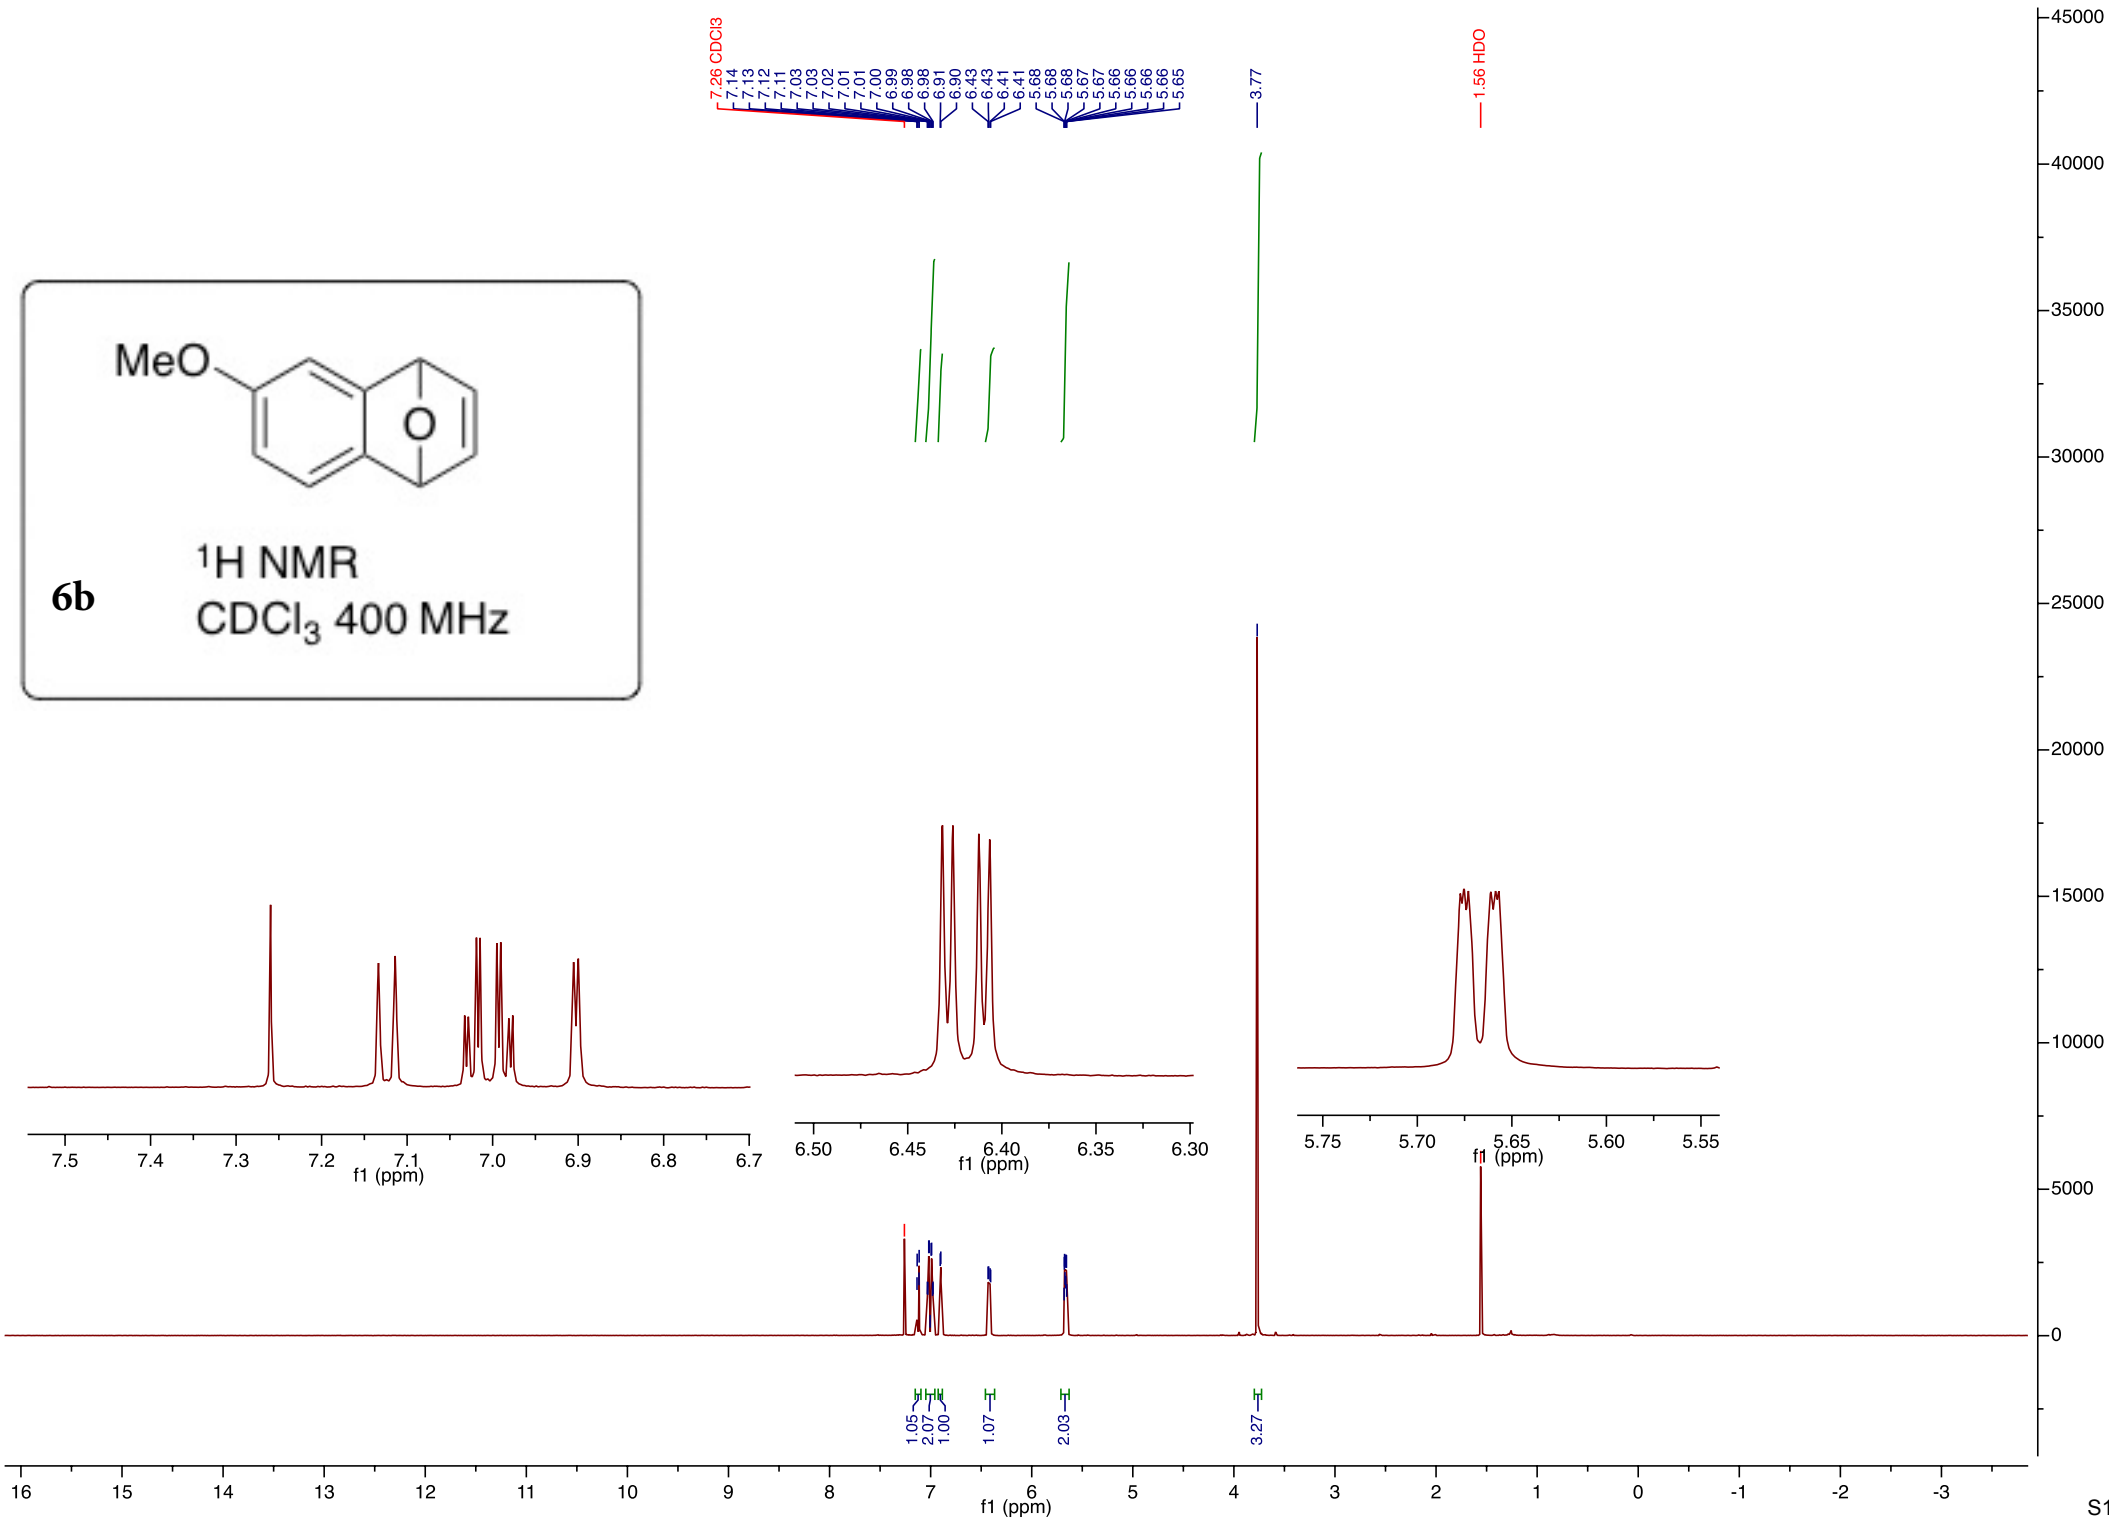

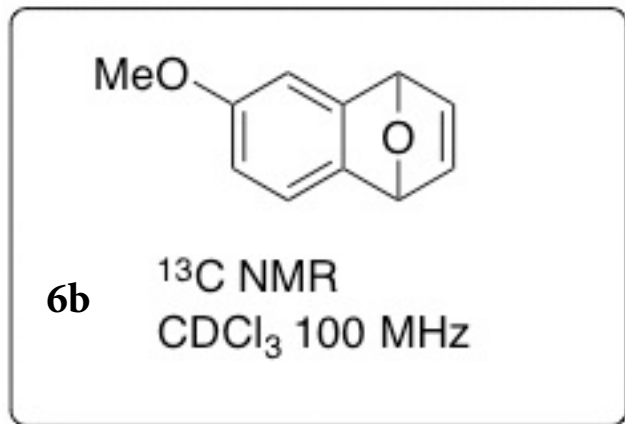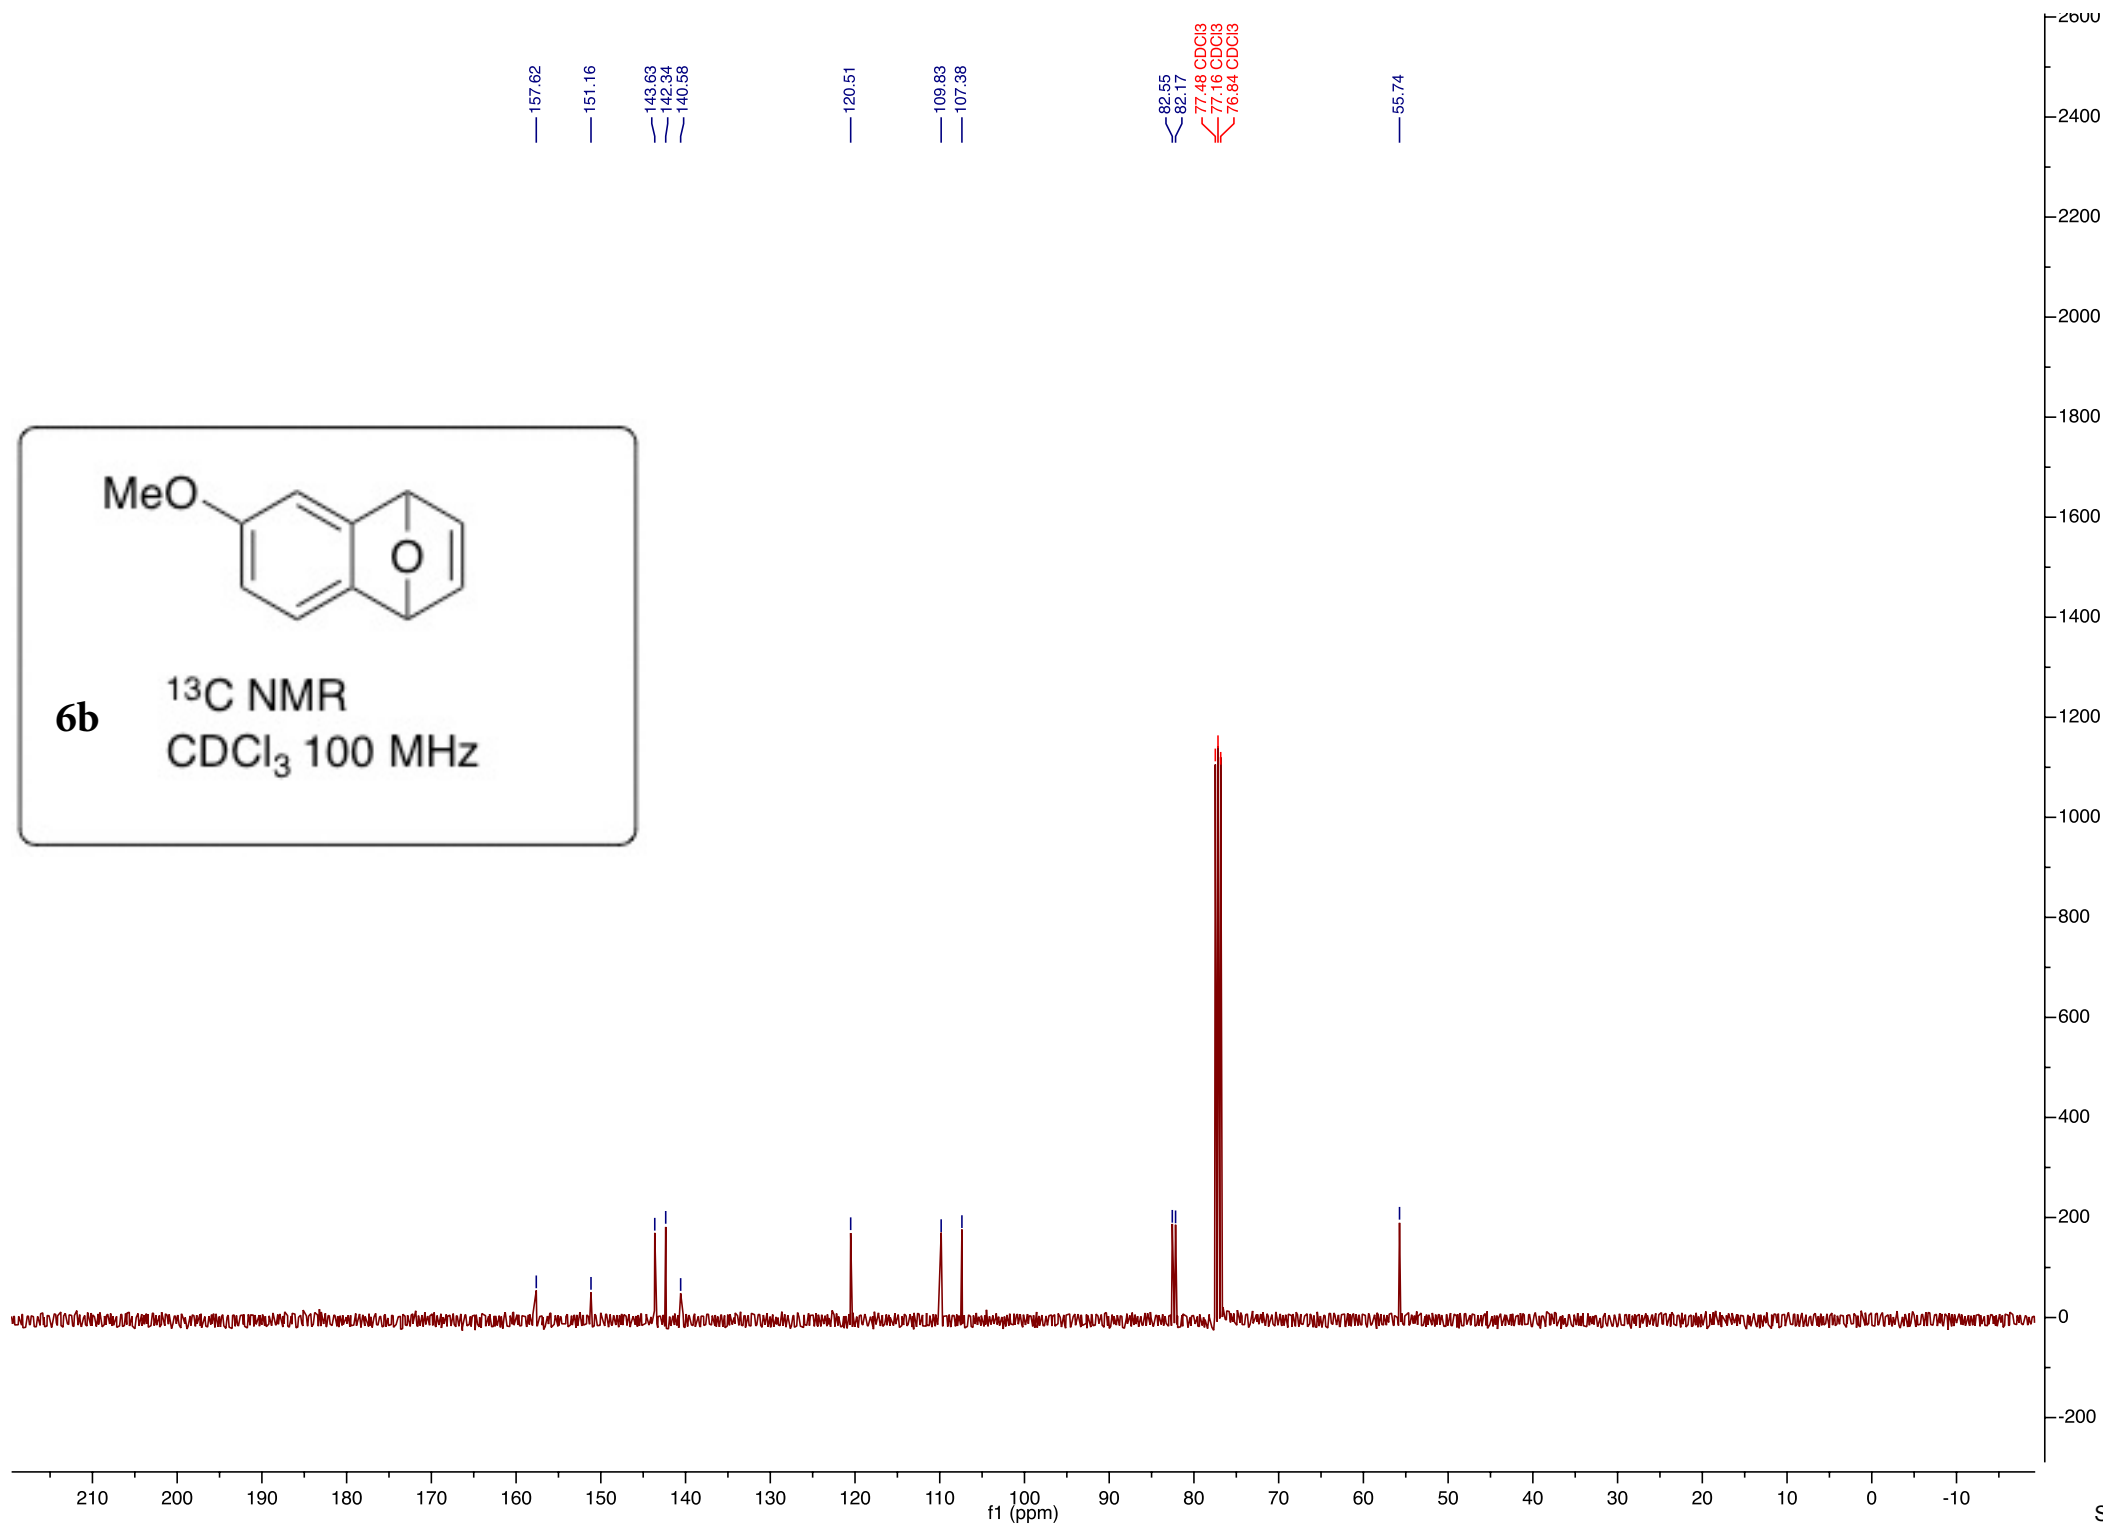

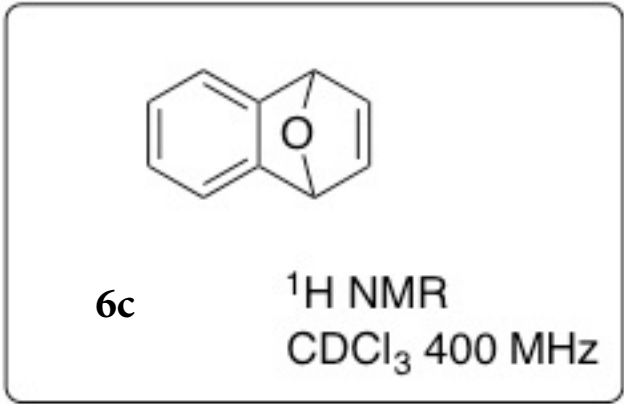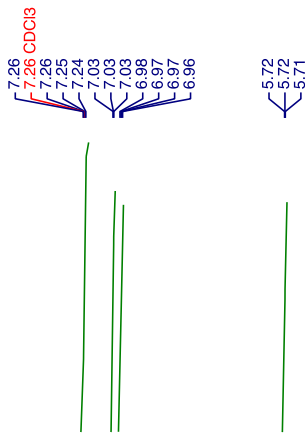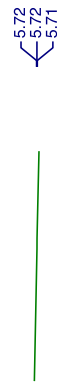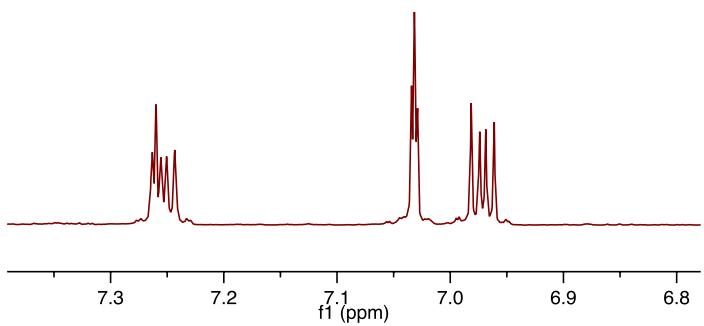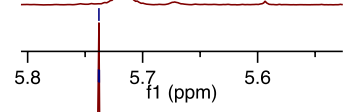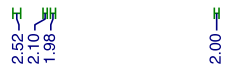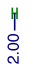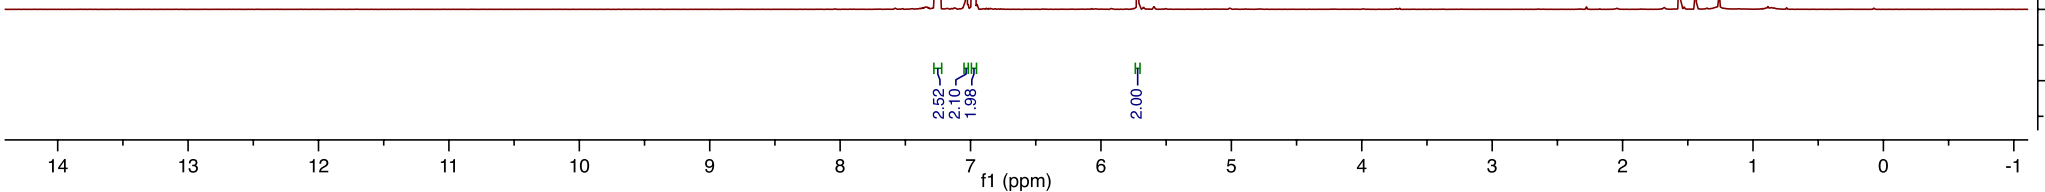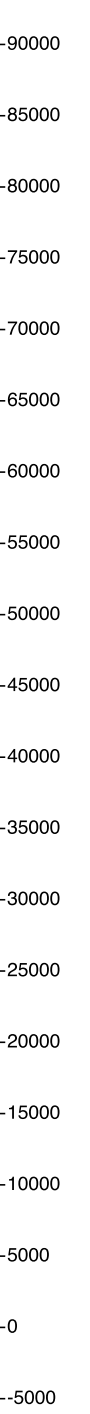



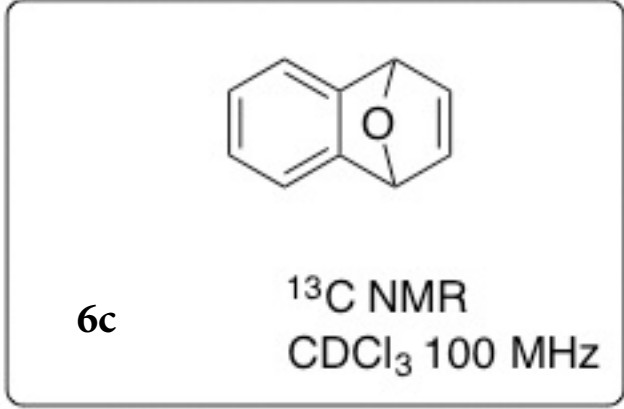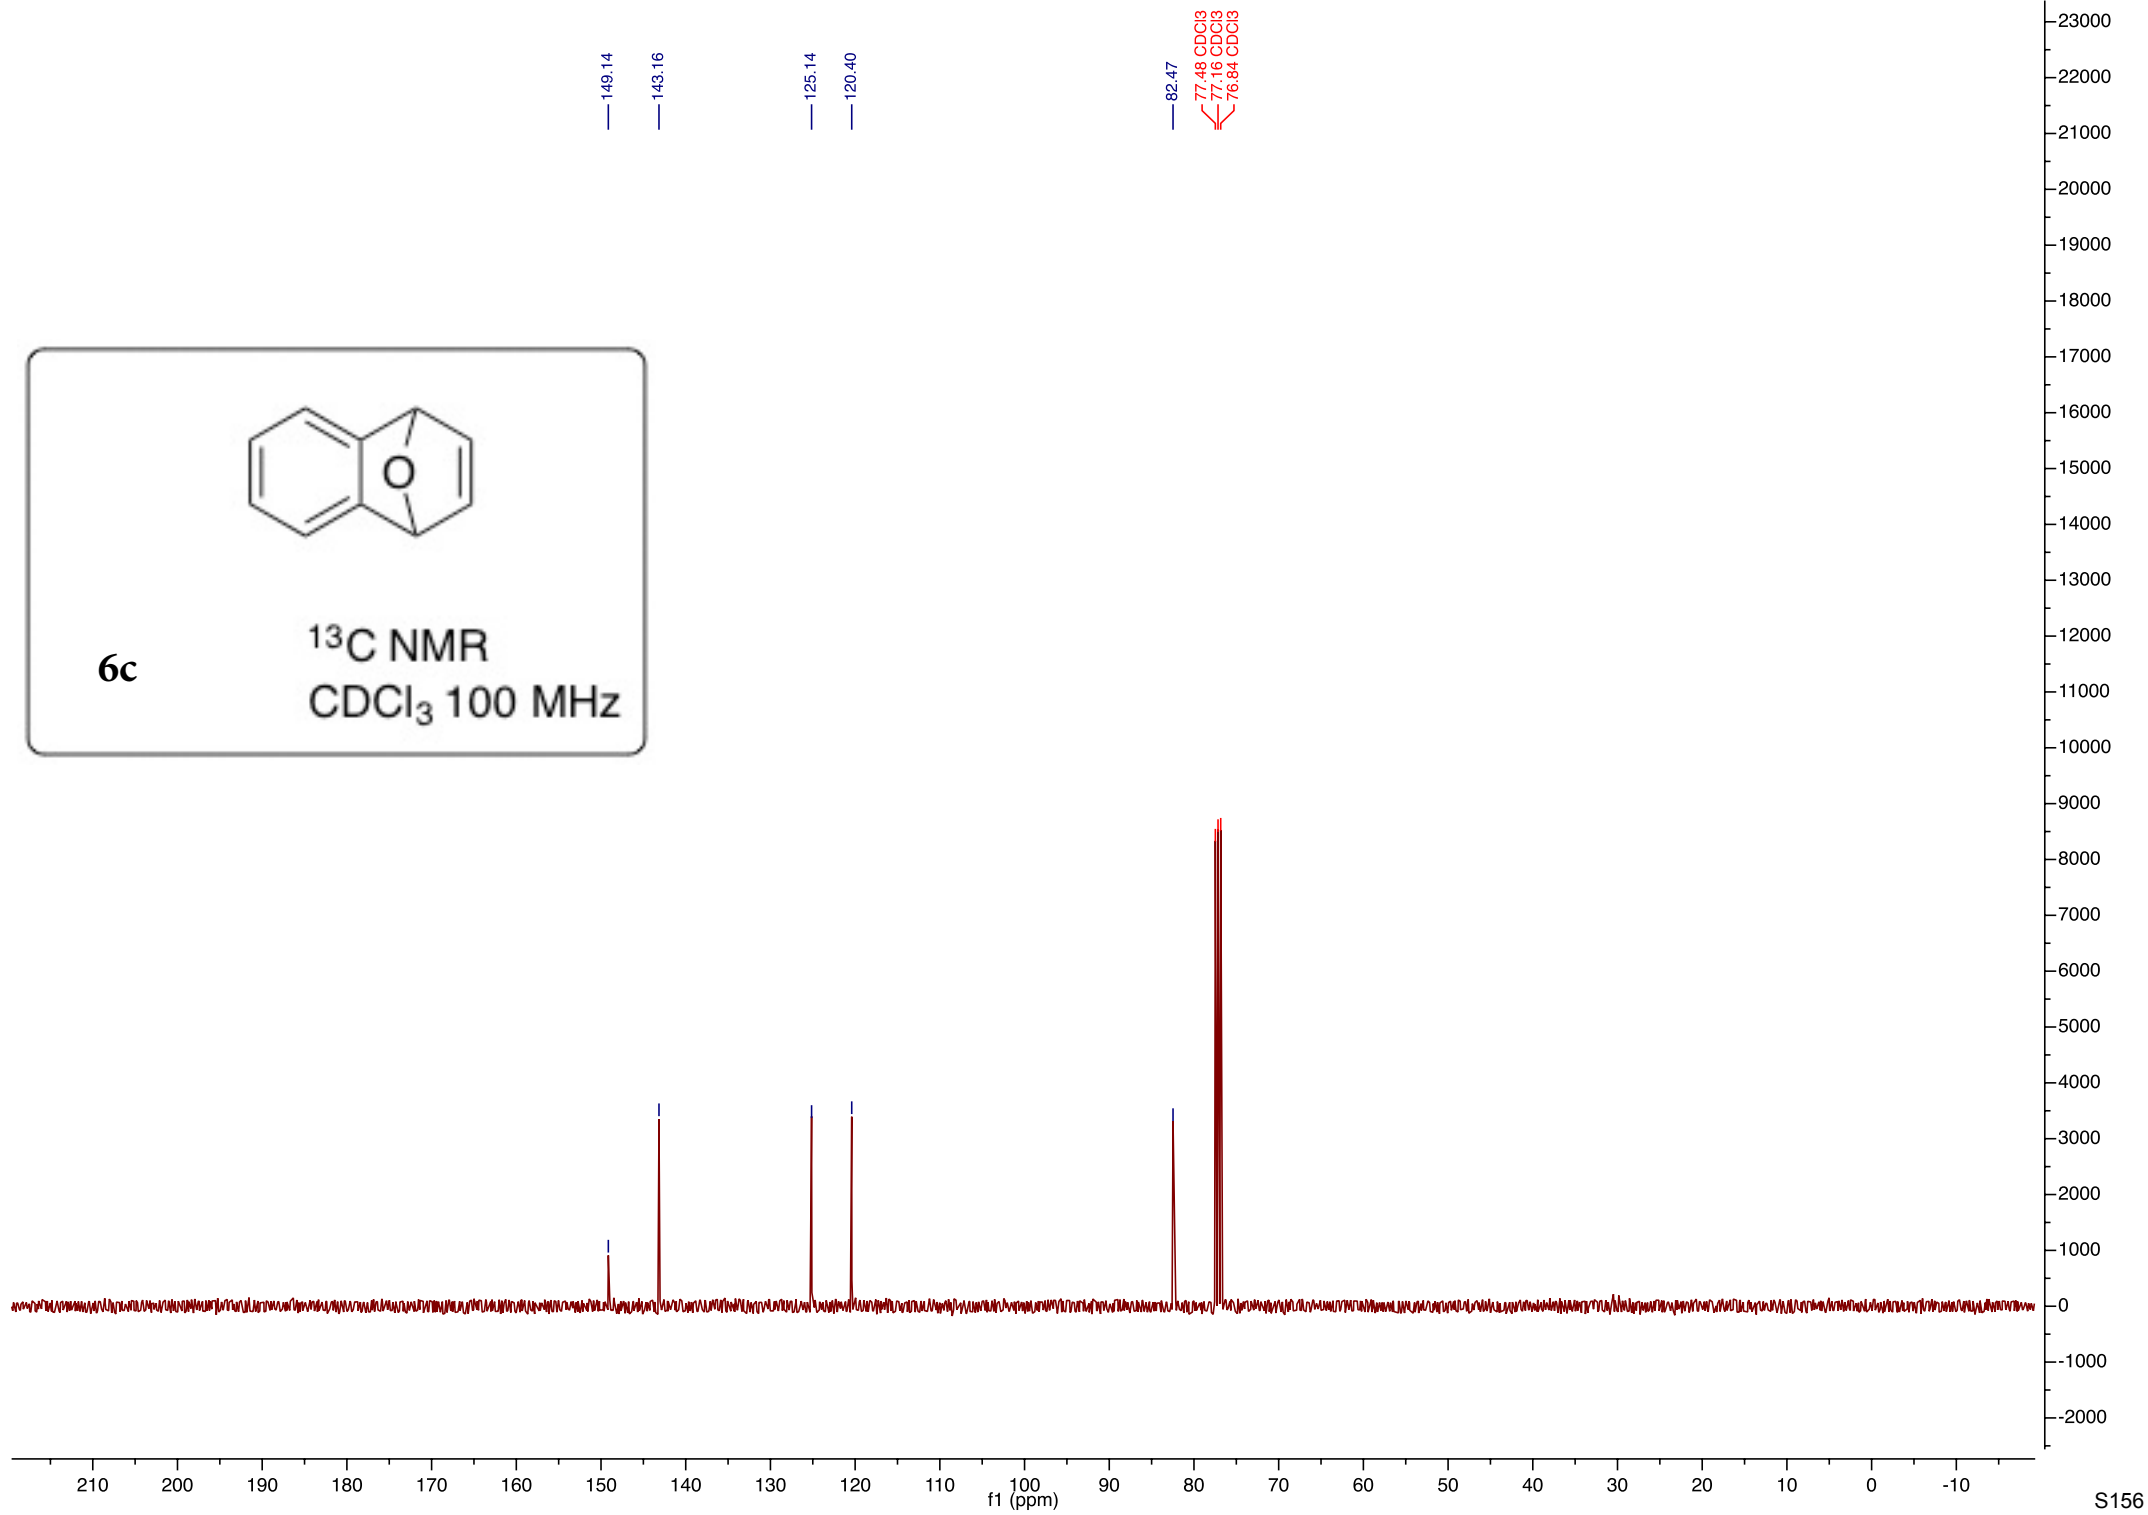

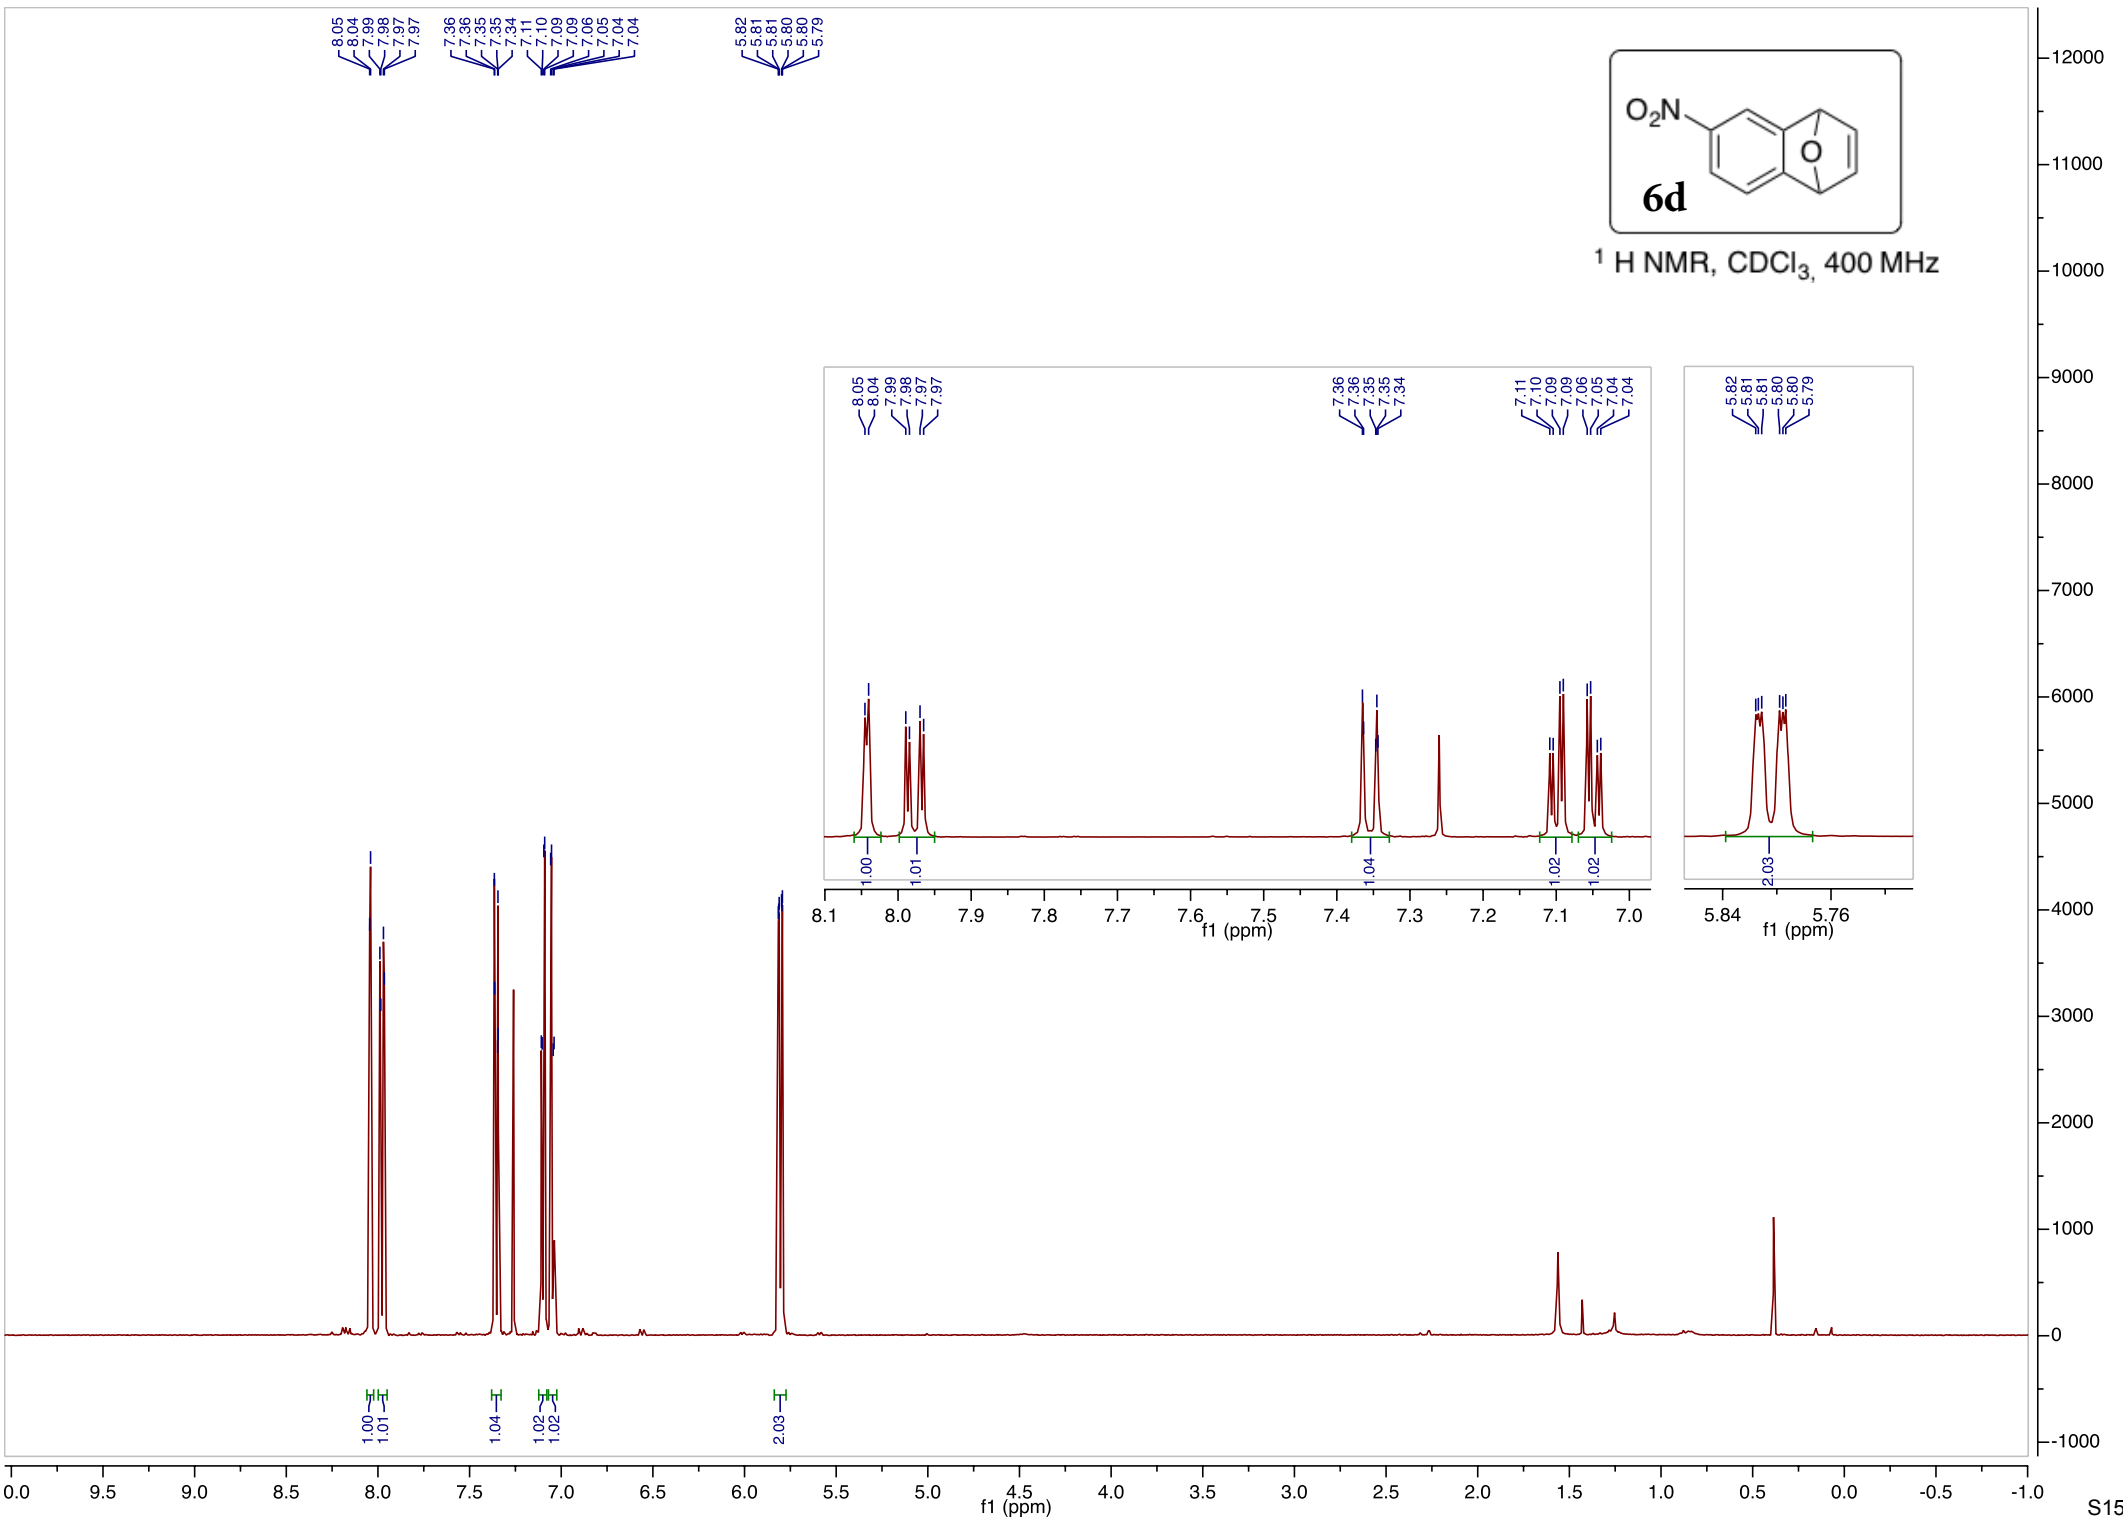

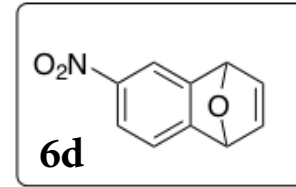

<sup>13</sup>C NMR, CDCl<sub>3</sub>, 100 MHz

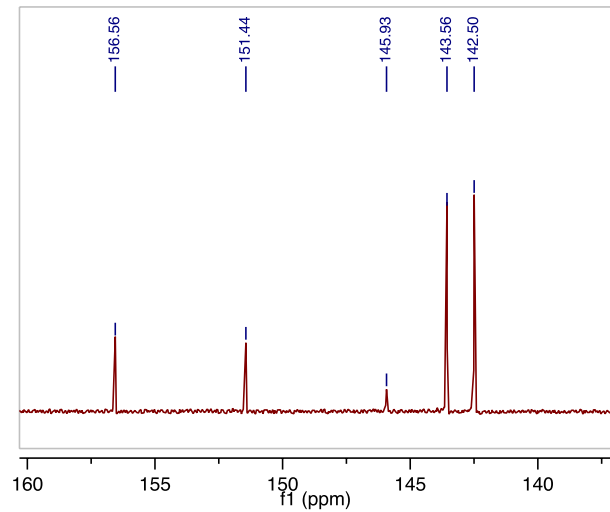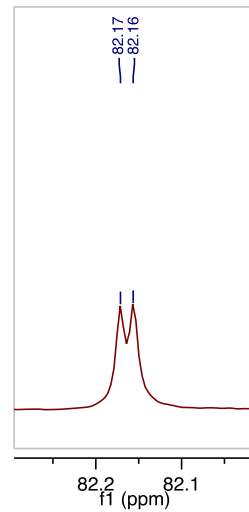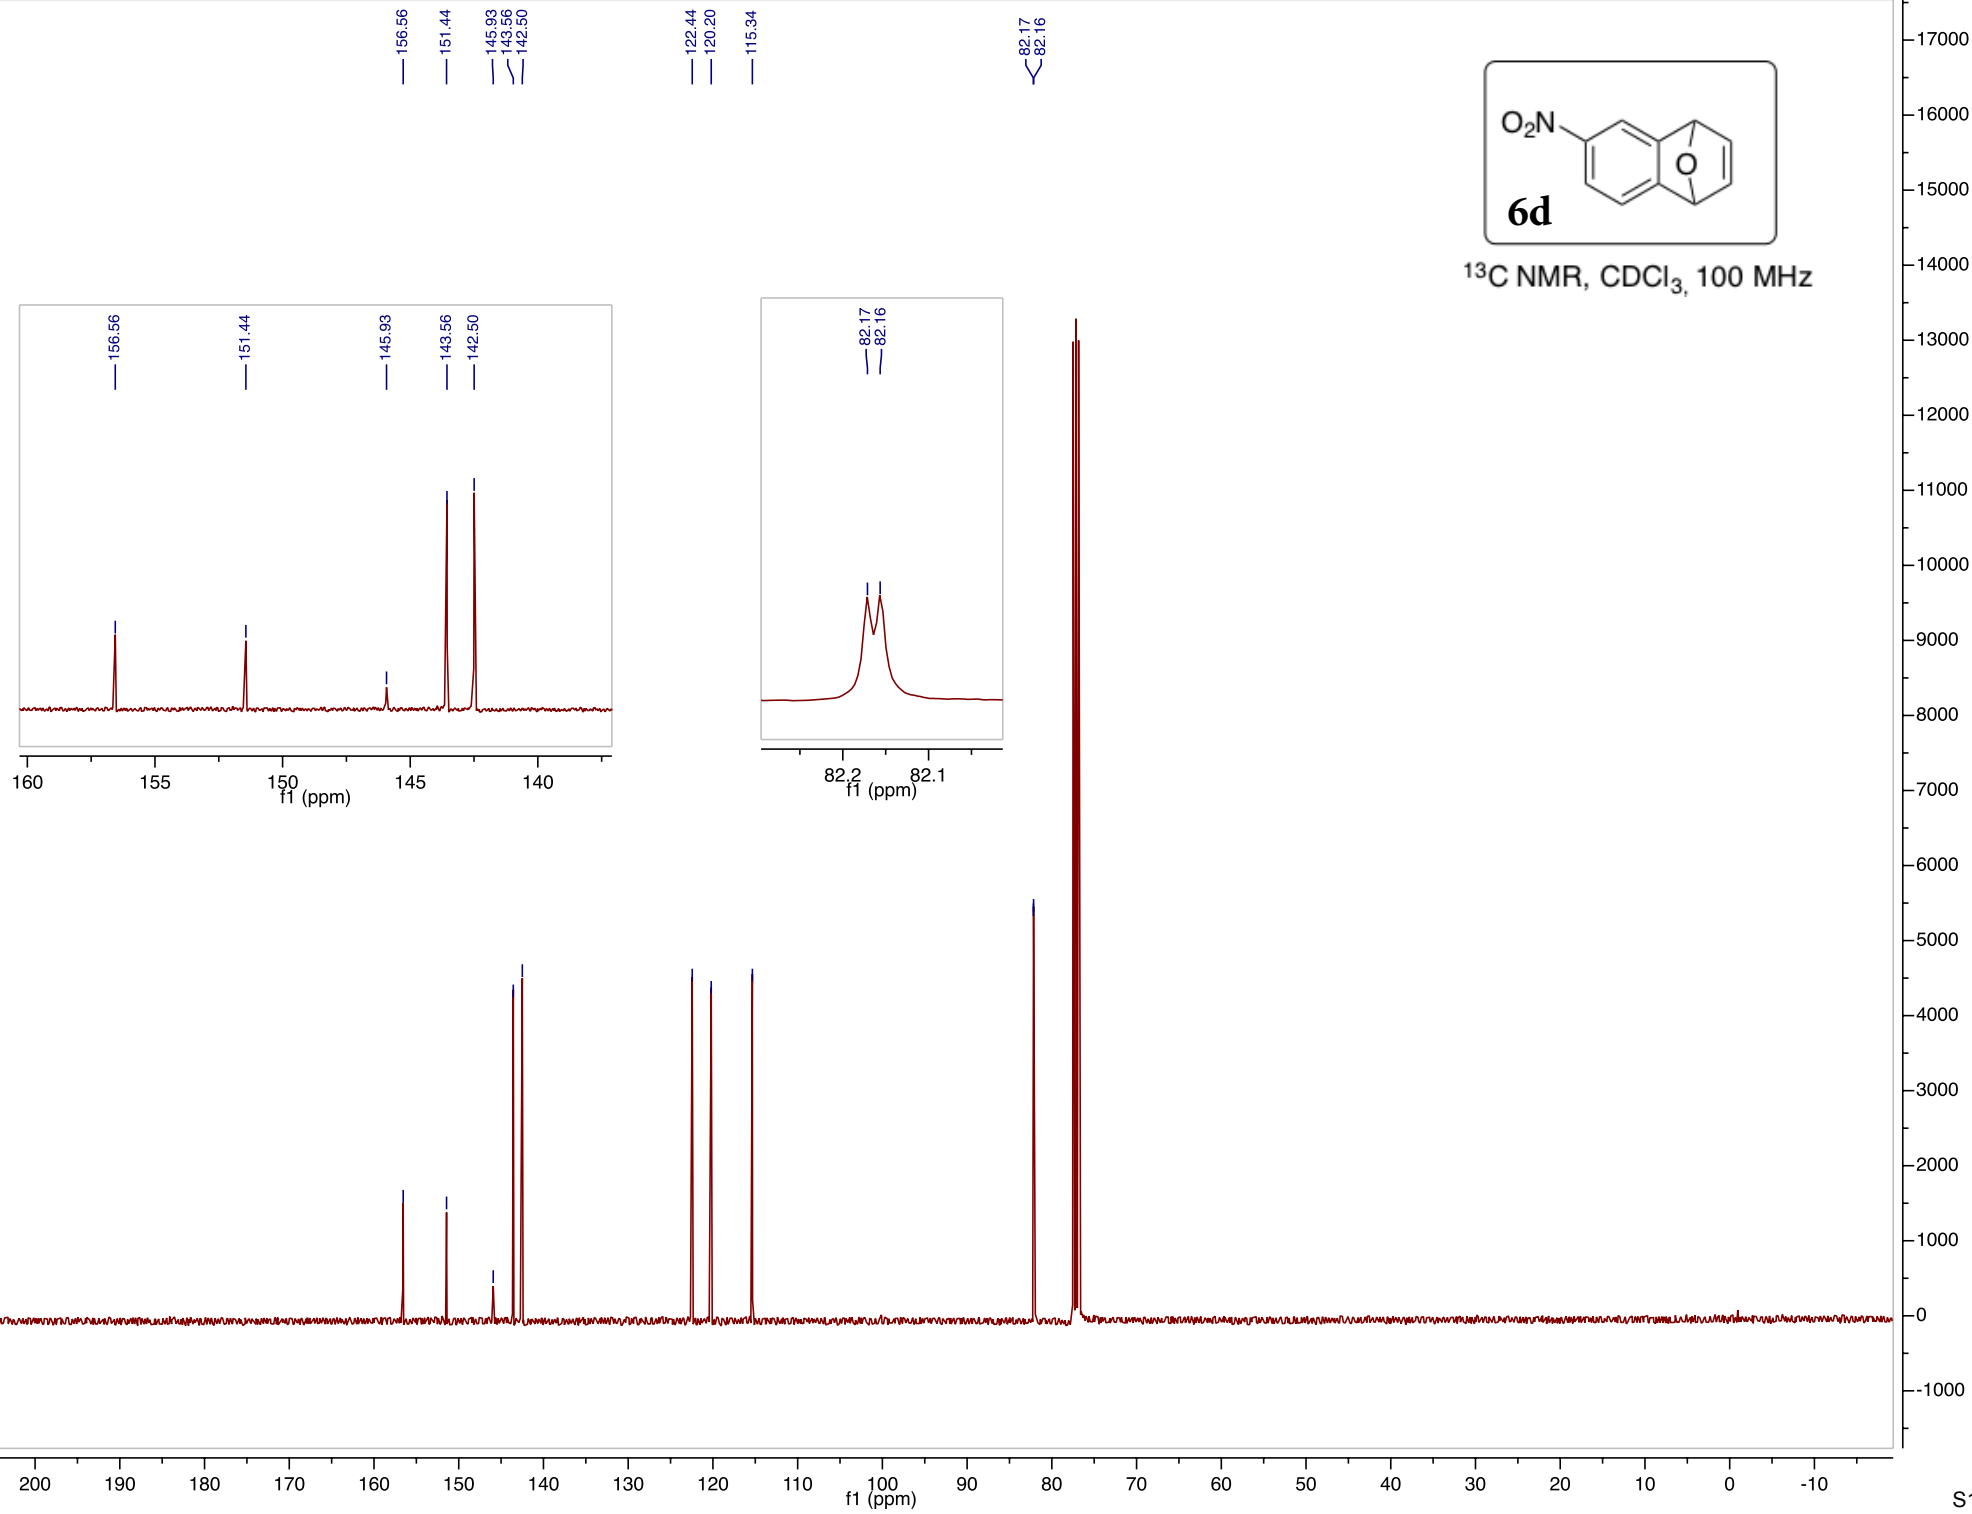

7.30  
7.29  
7.28  
7.28  
7.27  
7.27  
7.26  
6.98  
6.96  
6.87  
6.87  
6.86  
6.85  
6.85  
6.84  
6.83  
6.83

3.20  
3.18  
3.17

1.77  
1.76  
1.75  
1.74  
1.73  
1.73  
1.72  
1.71  
1.63  
1.62  
1.61  
1.61  
1.60  
1.59  
1.59  
1.58  
1.58  
1.57

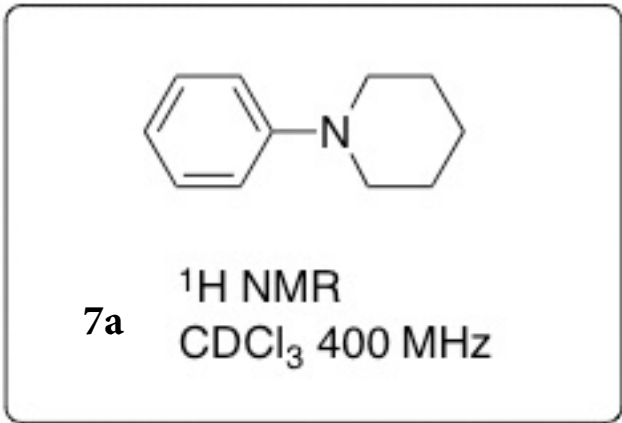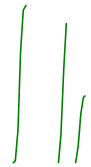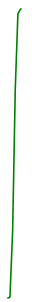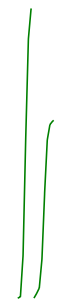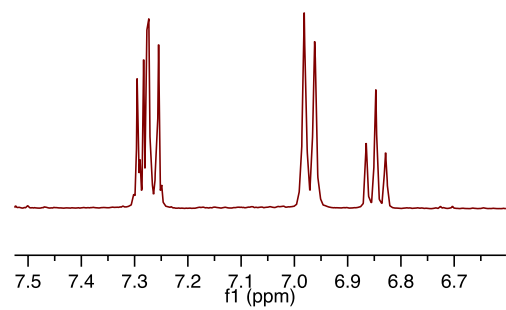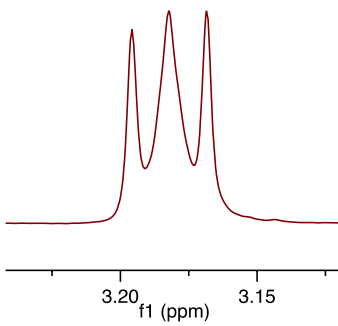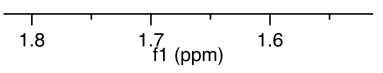

2.34

2.08

1.00

4.29

2.64

12.0 11.5 11.0 10.5 10.0 9.5 9.0 8.5 8.0 7.5 7.0 6.5 6.0 5.5 5.0 4.5 4.0 3.5 3.0 2.5 2.0 1.5 1.0 0.5 0.0 -0.5 -1.0 -1.5

32000  
30000  
28000  
26000  
24000  
22000  
20000  
18000  
16000  
14000  
12000  
10000  
8000  
6000  
4000  
2000  
0  
-2000

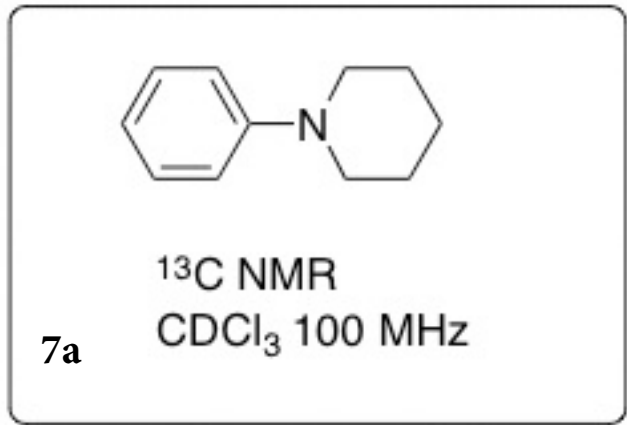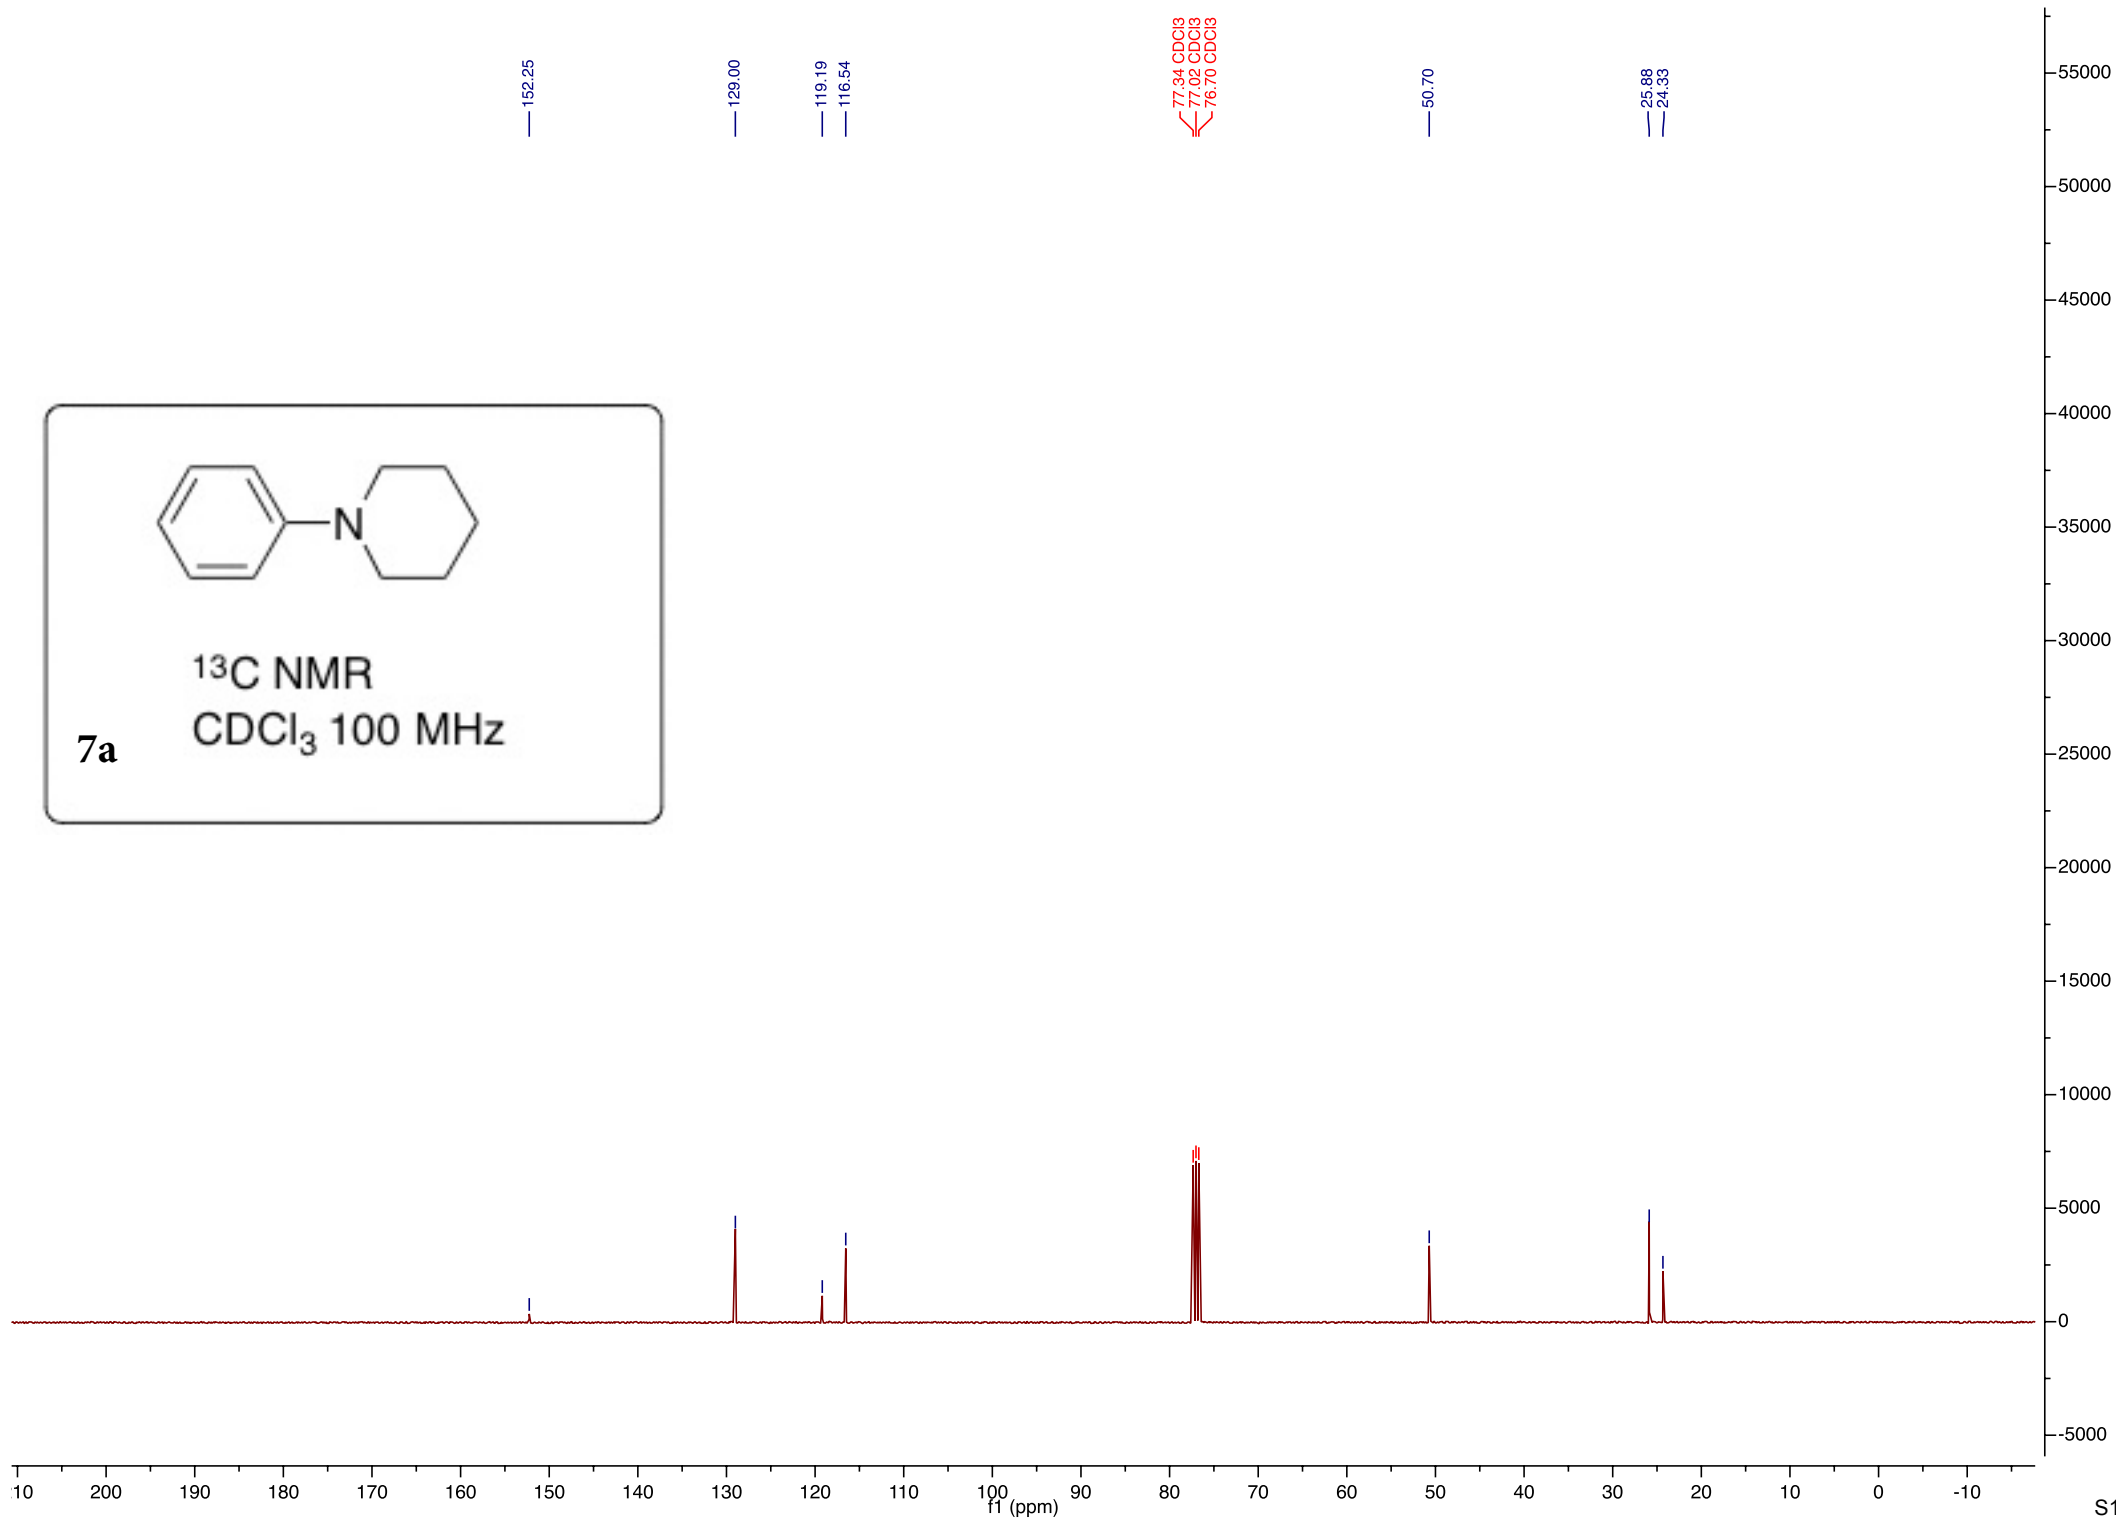

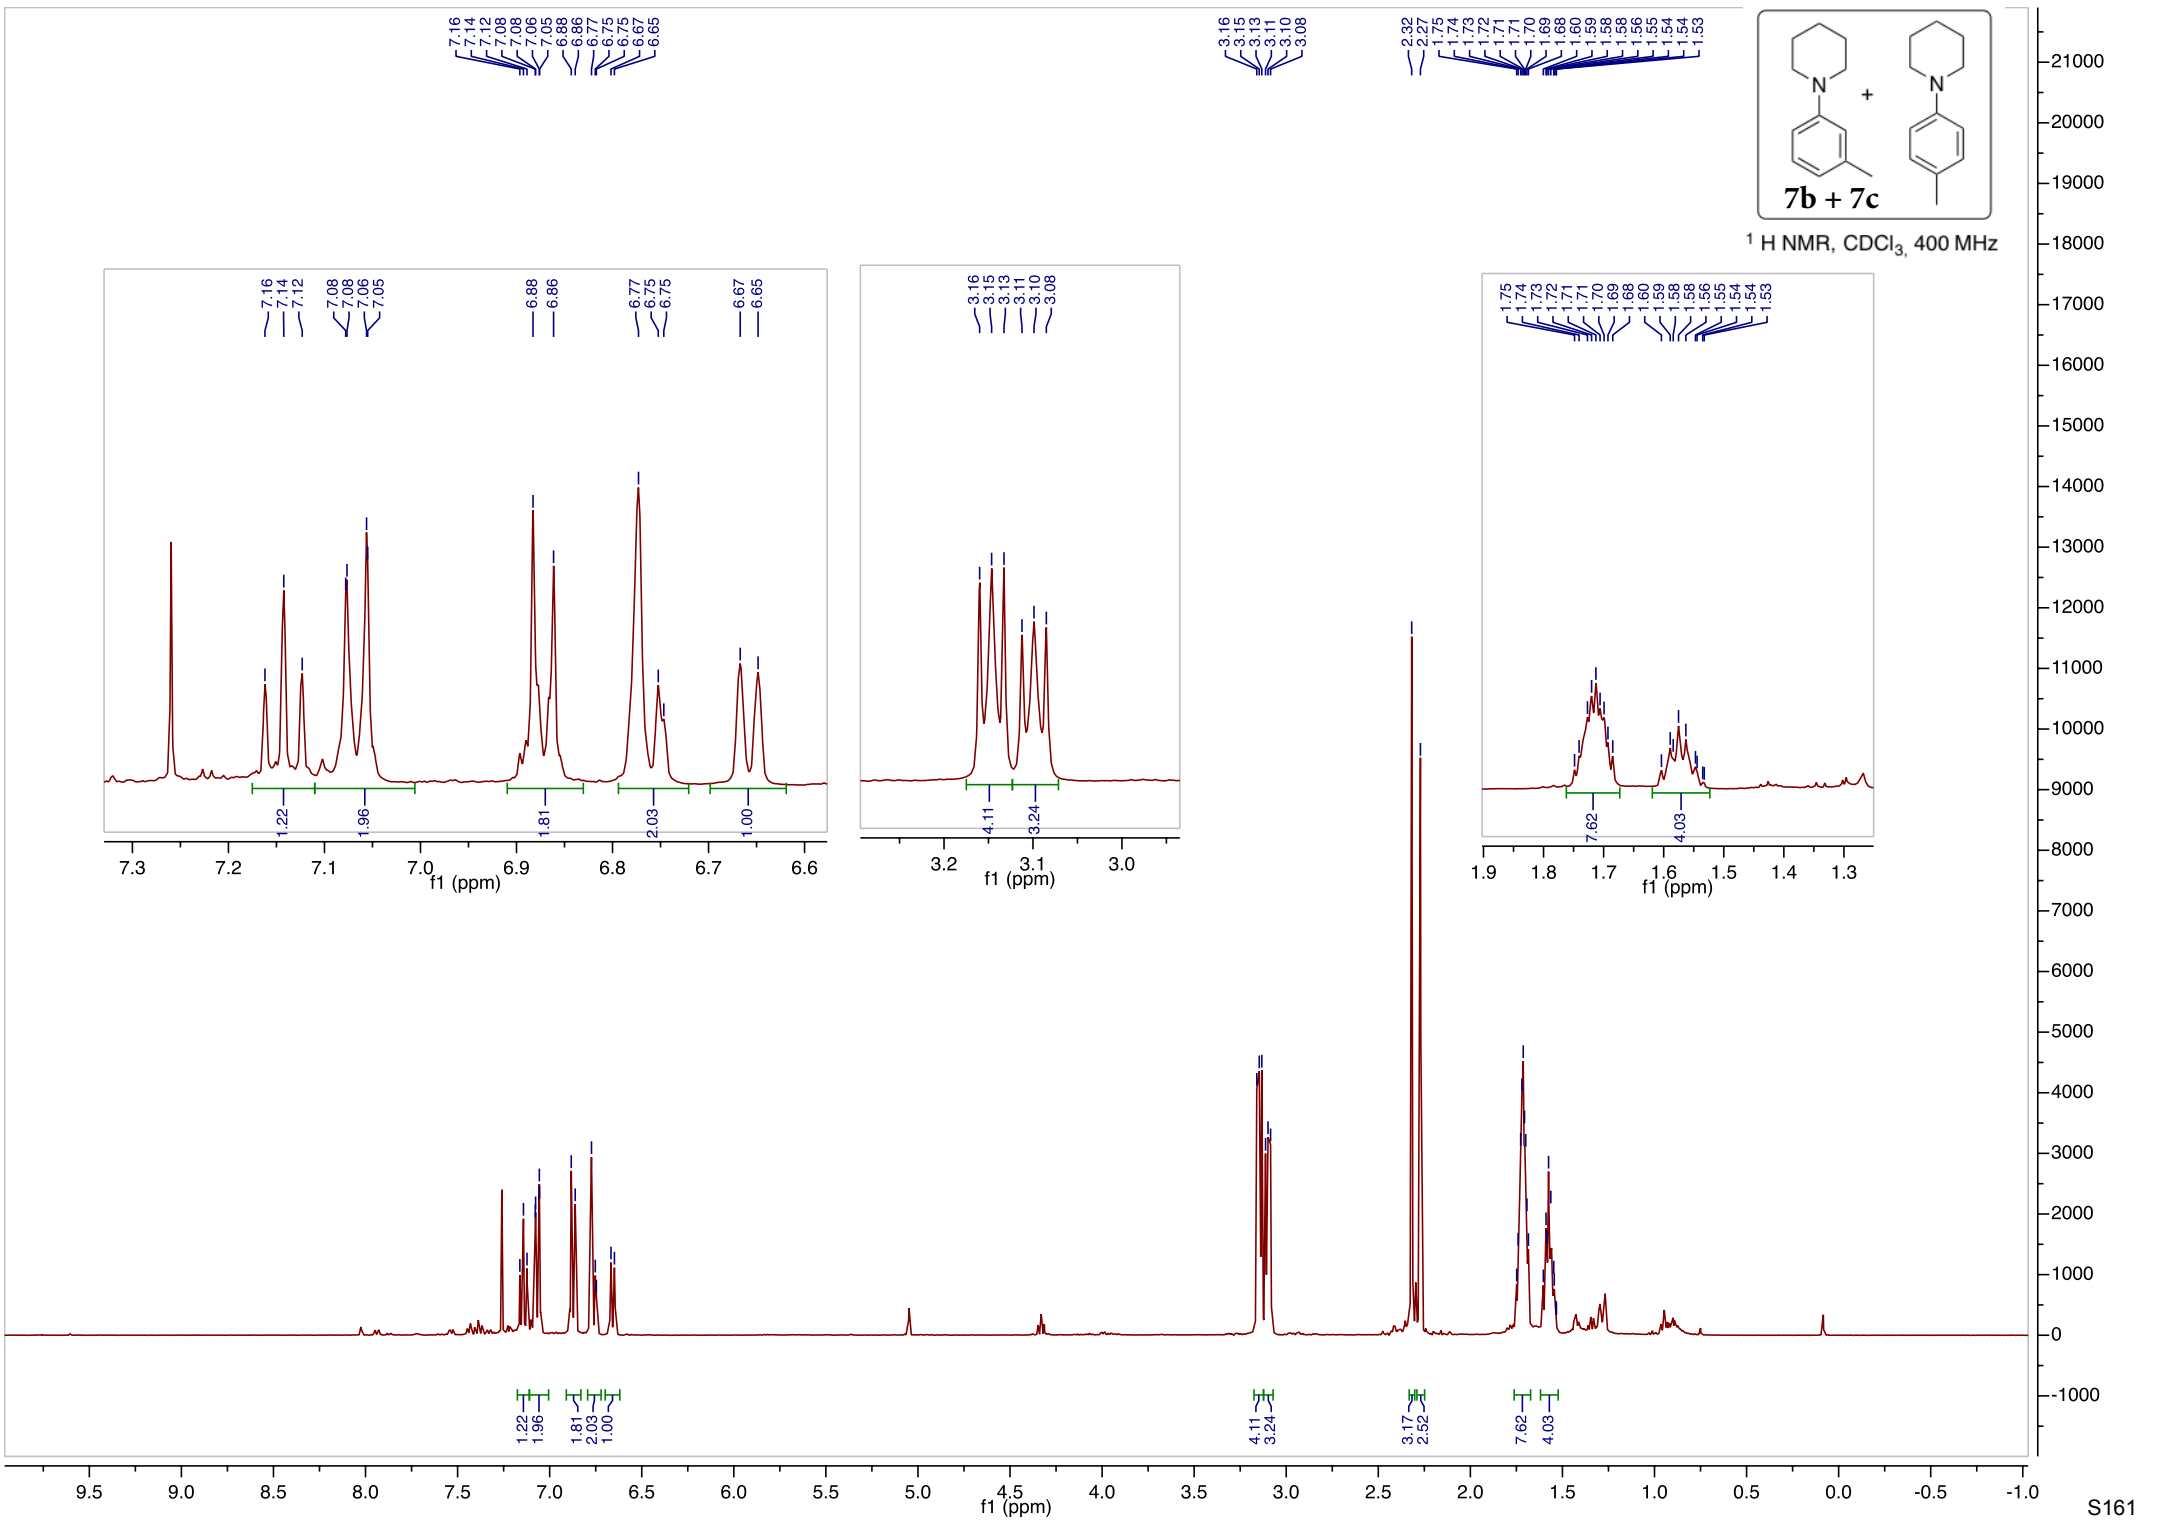

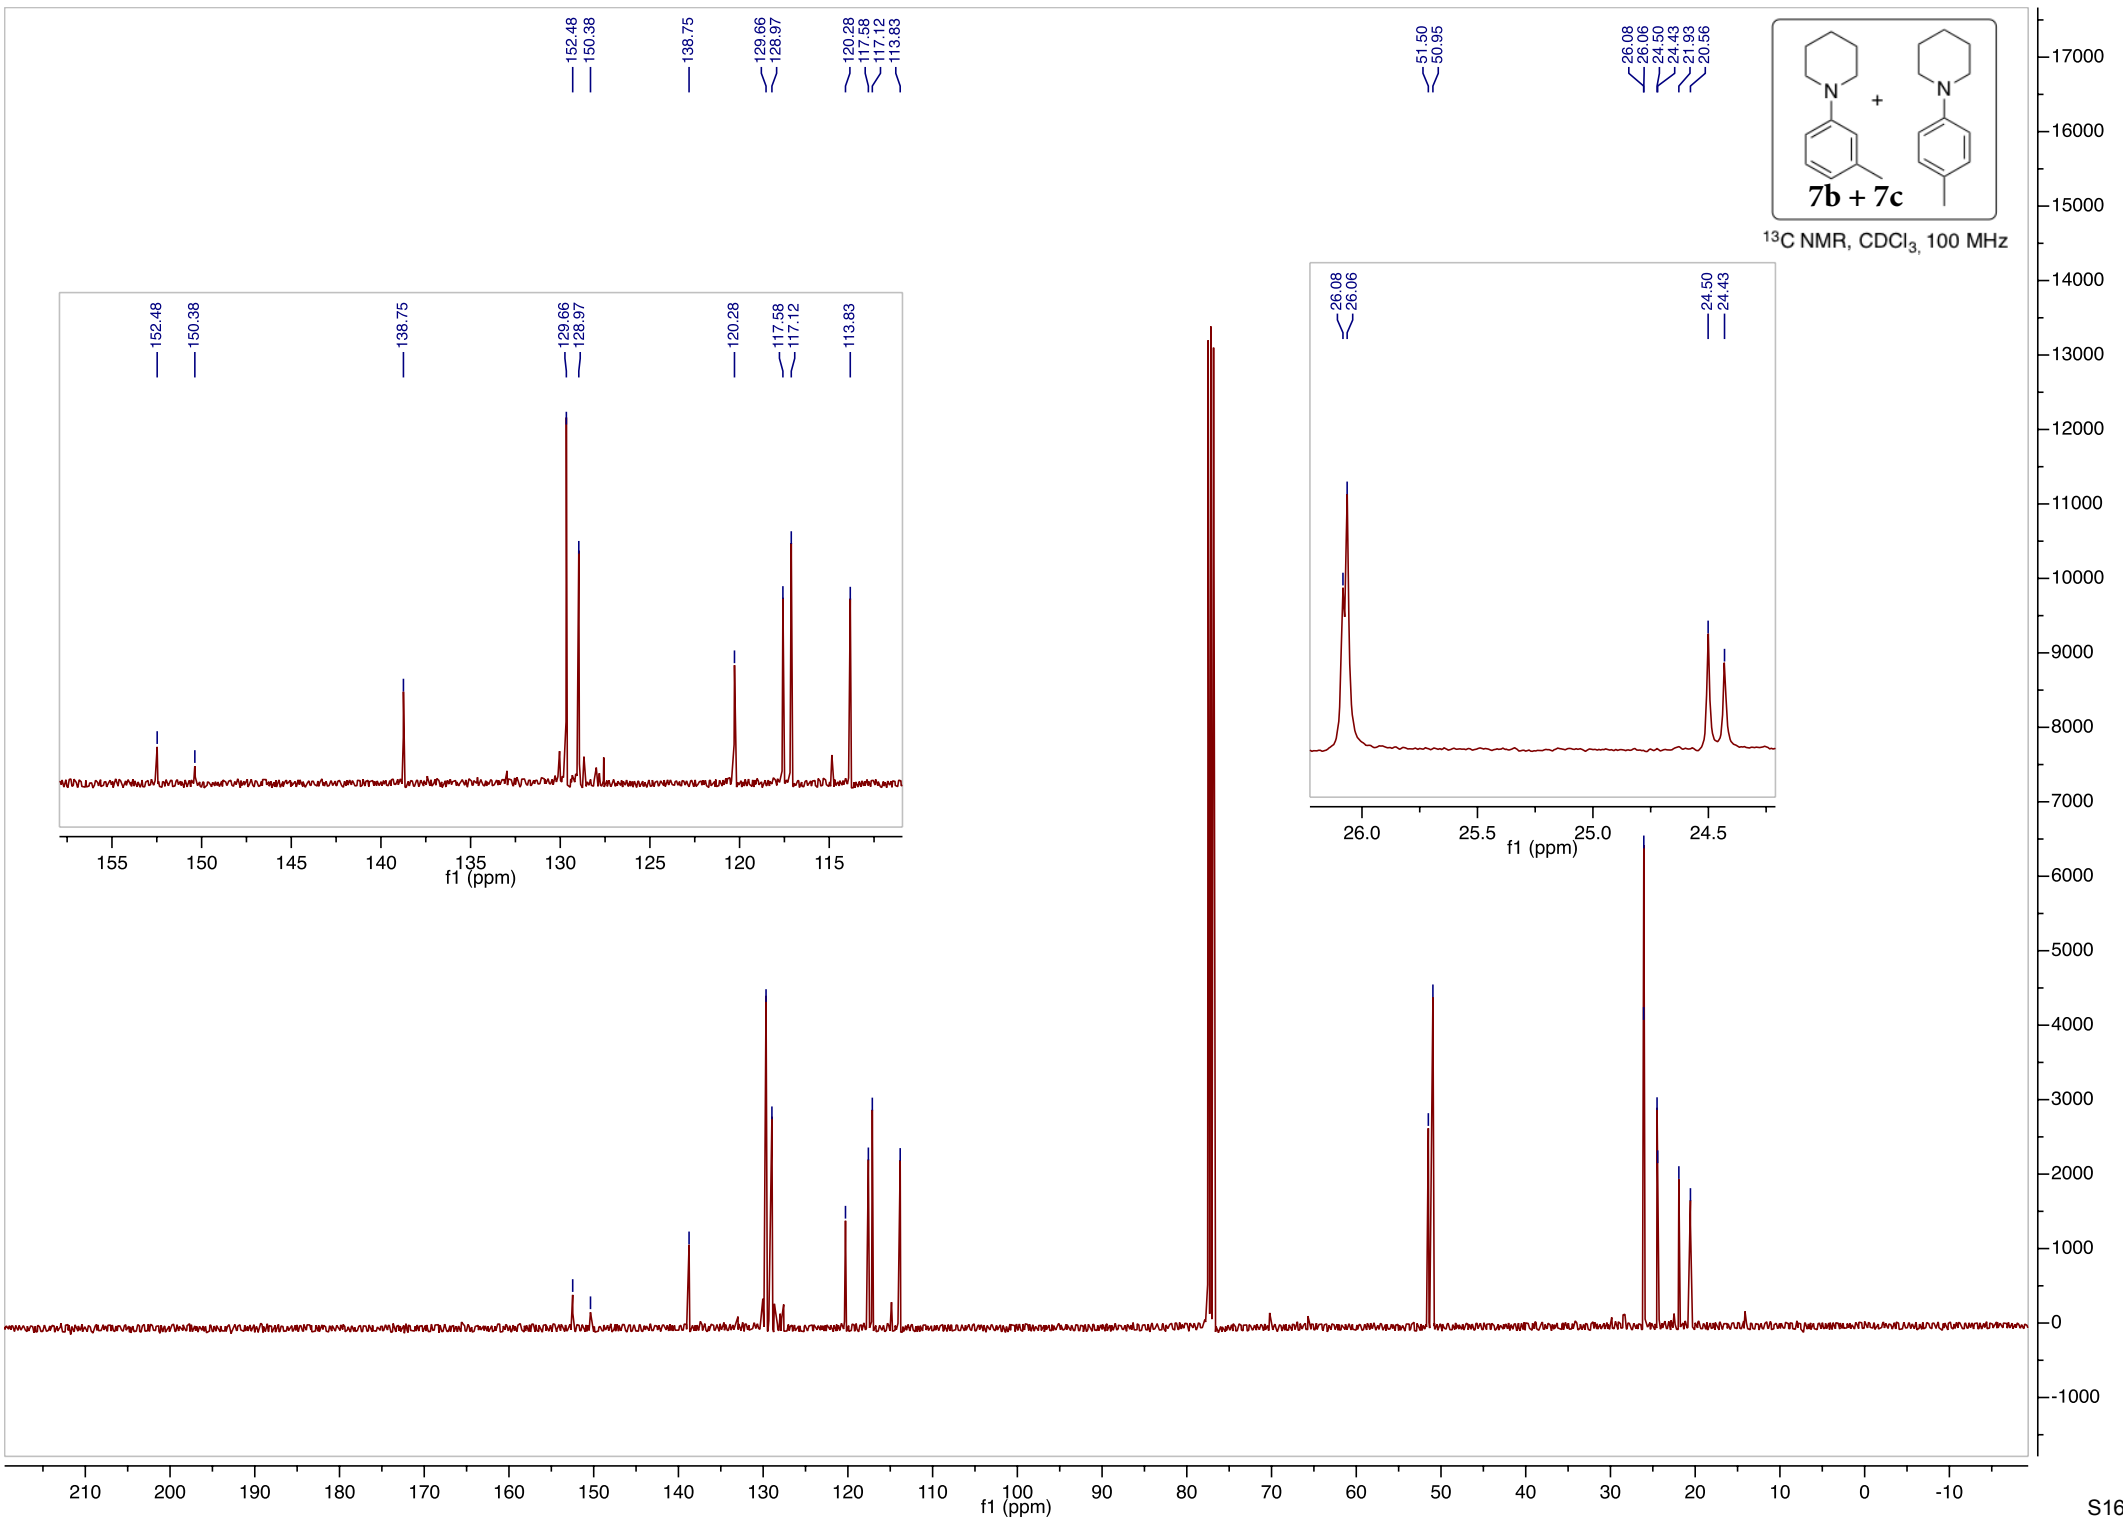

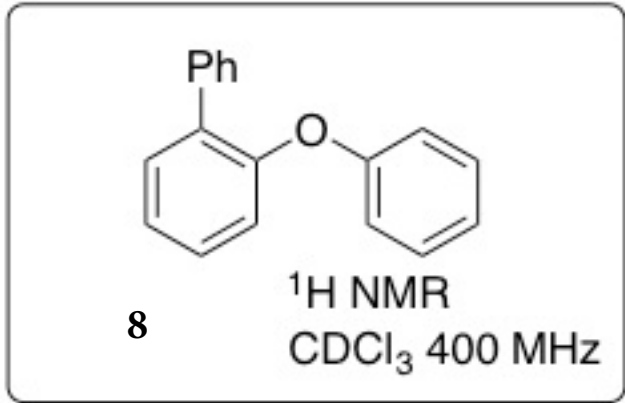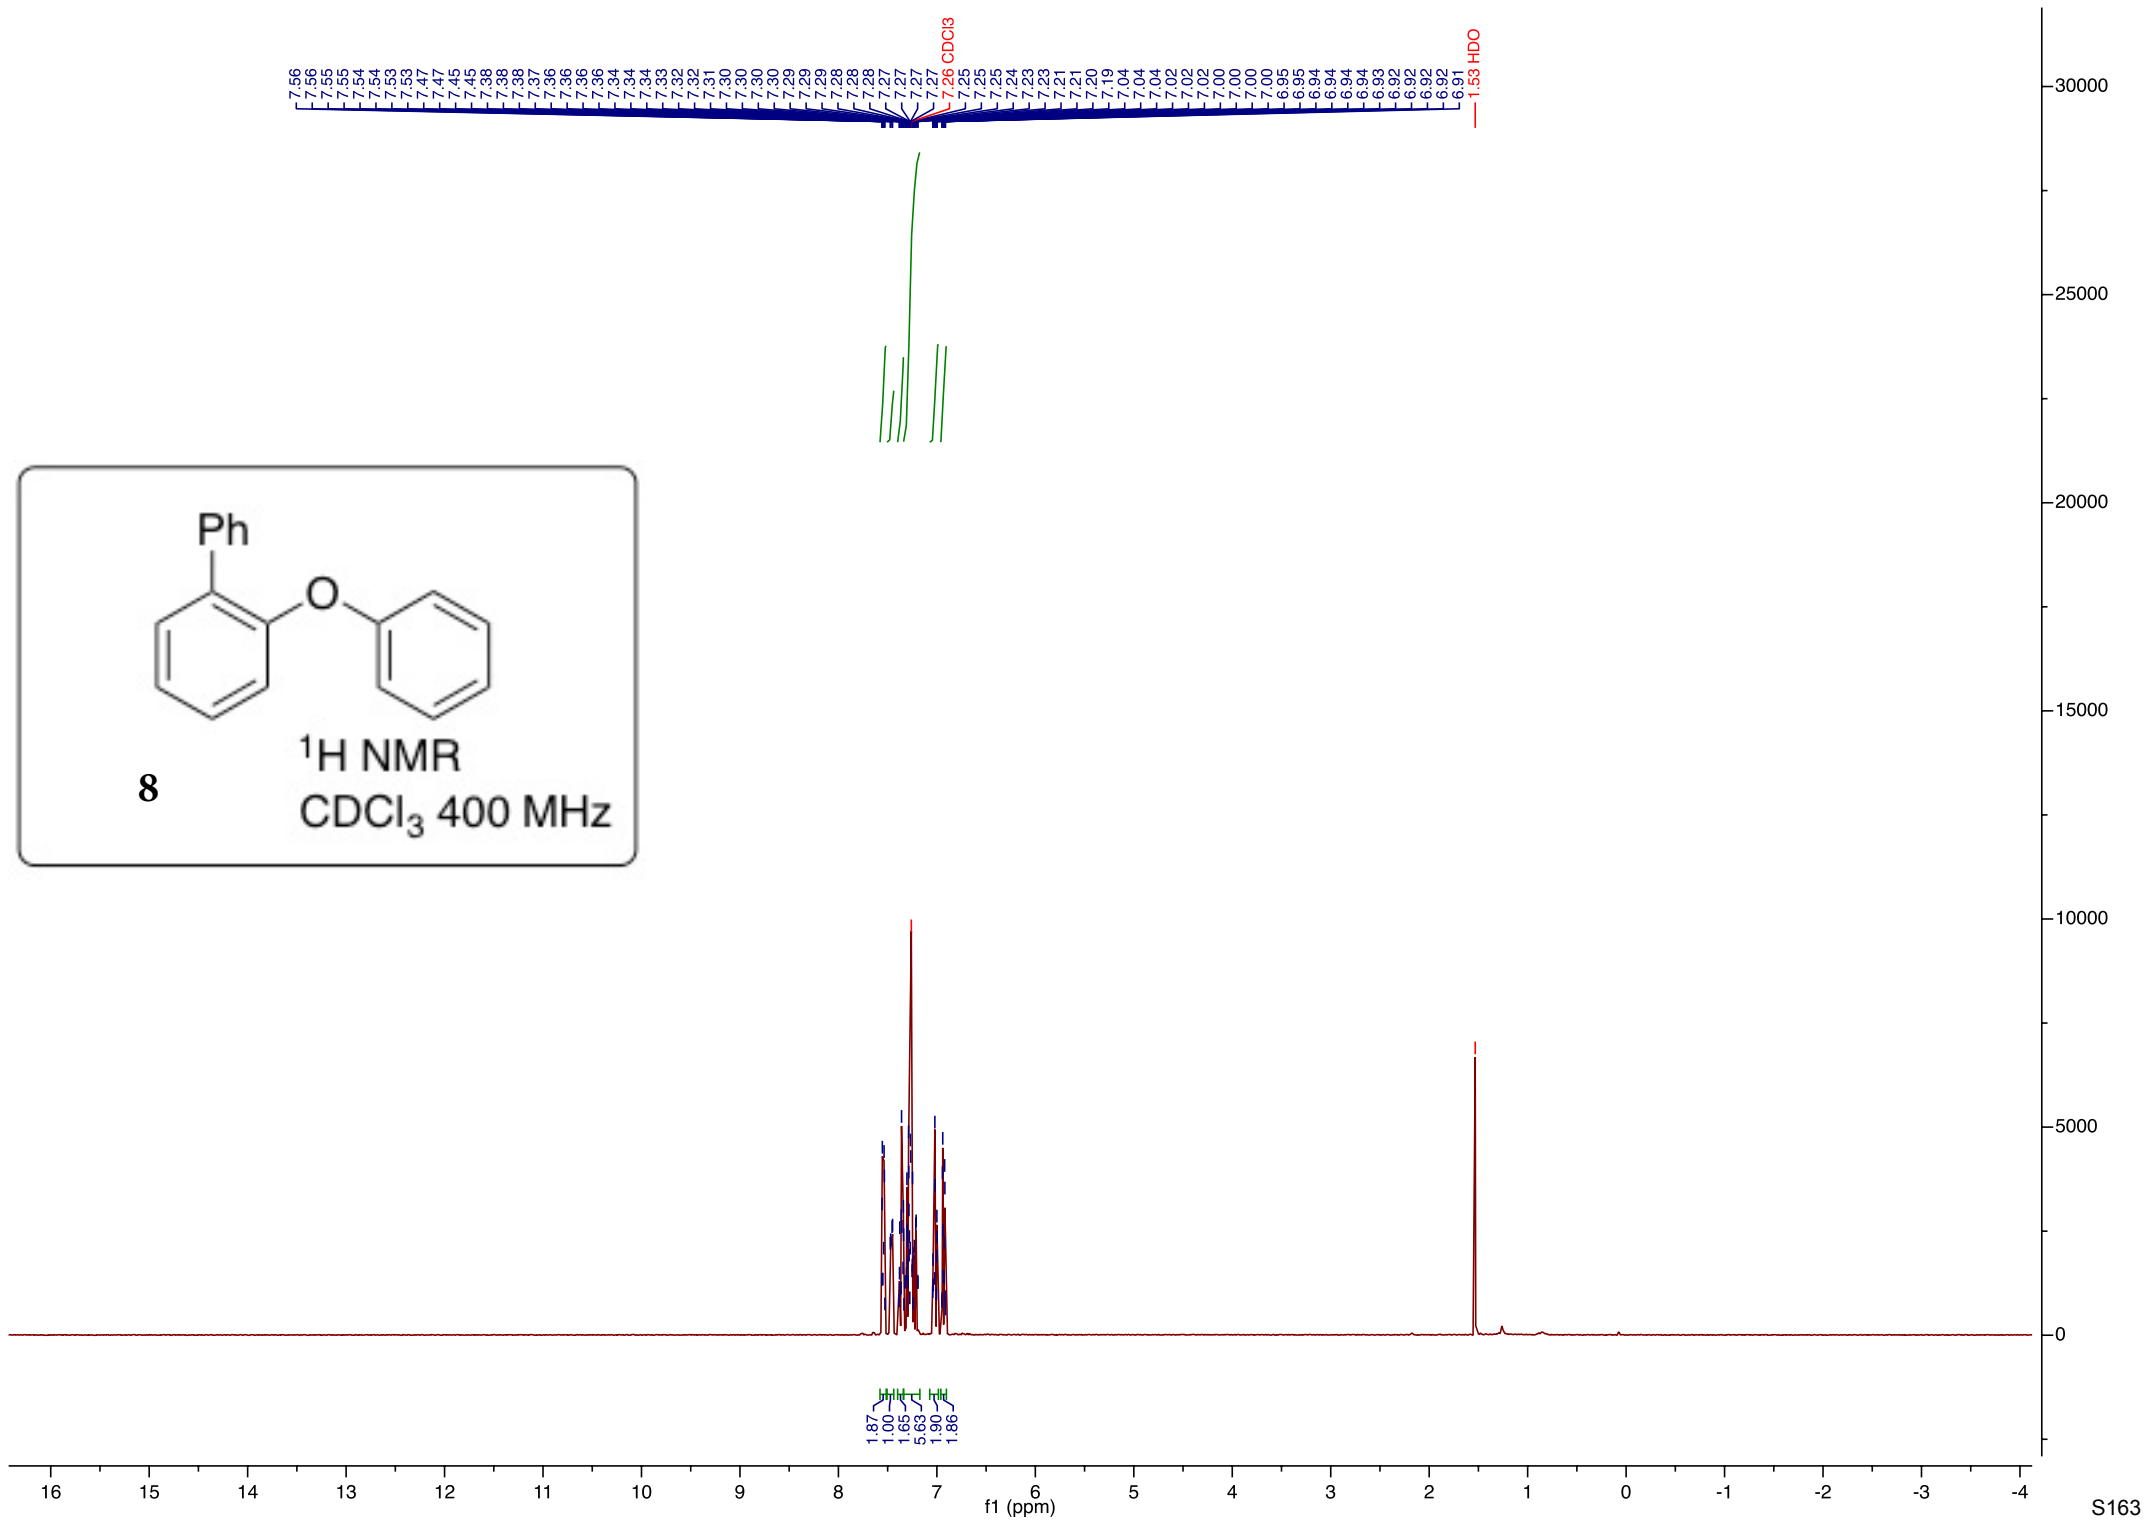



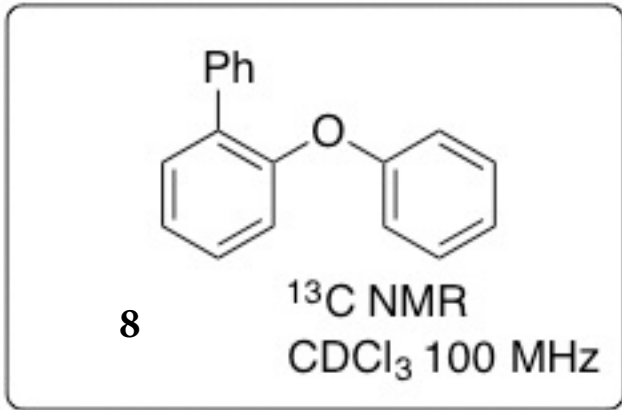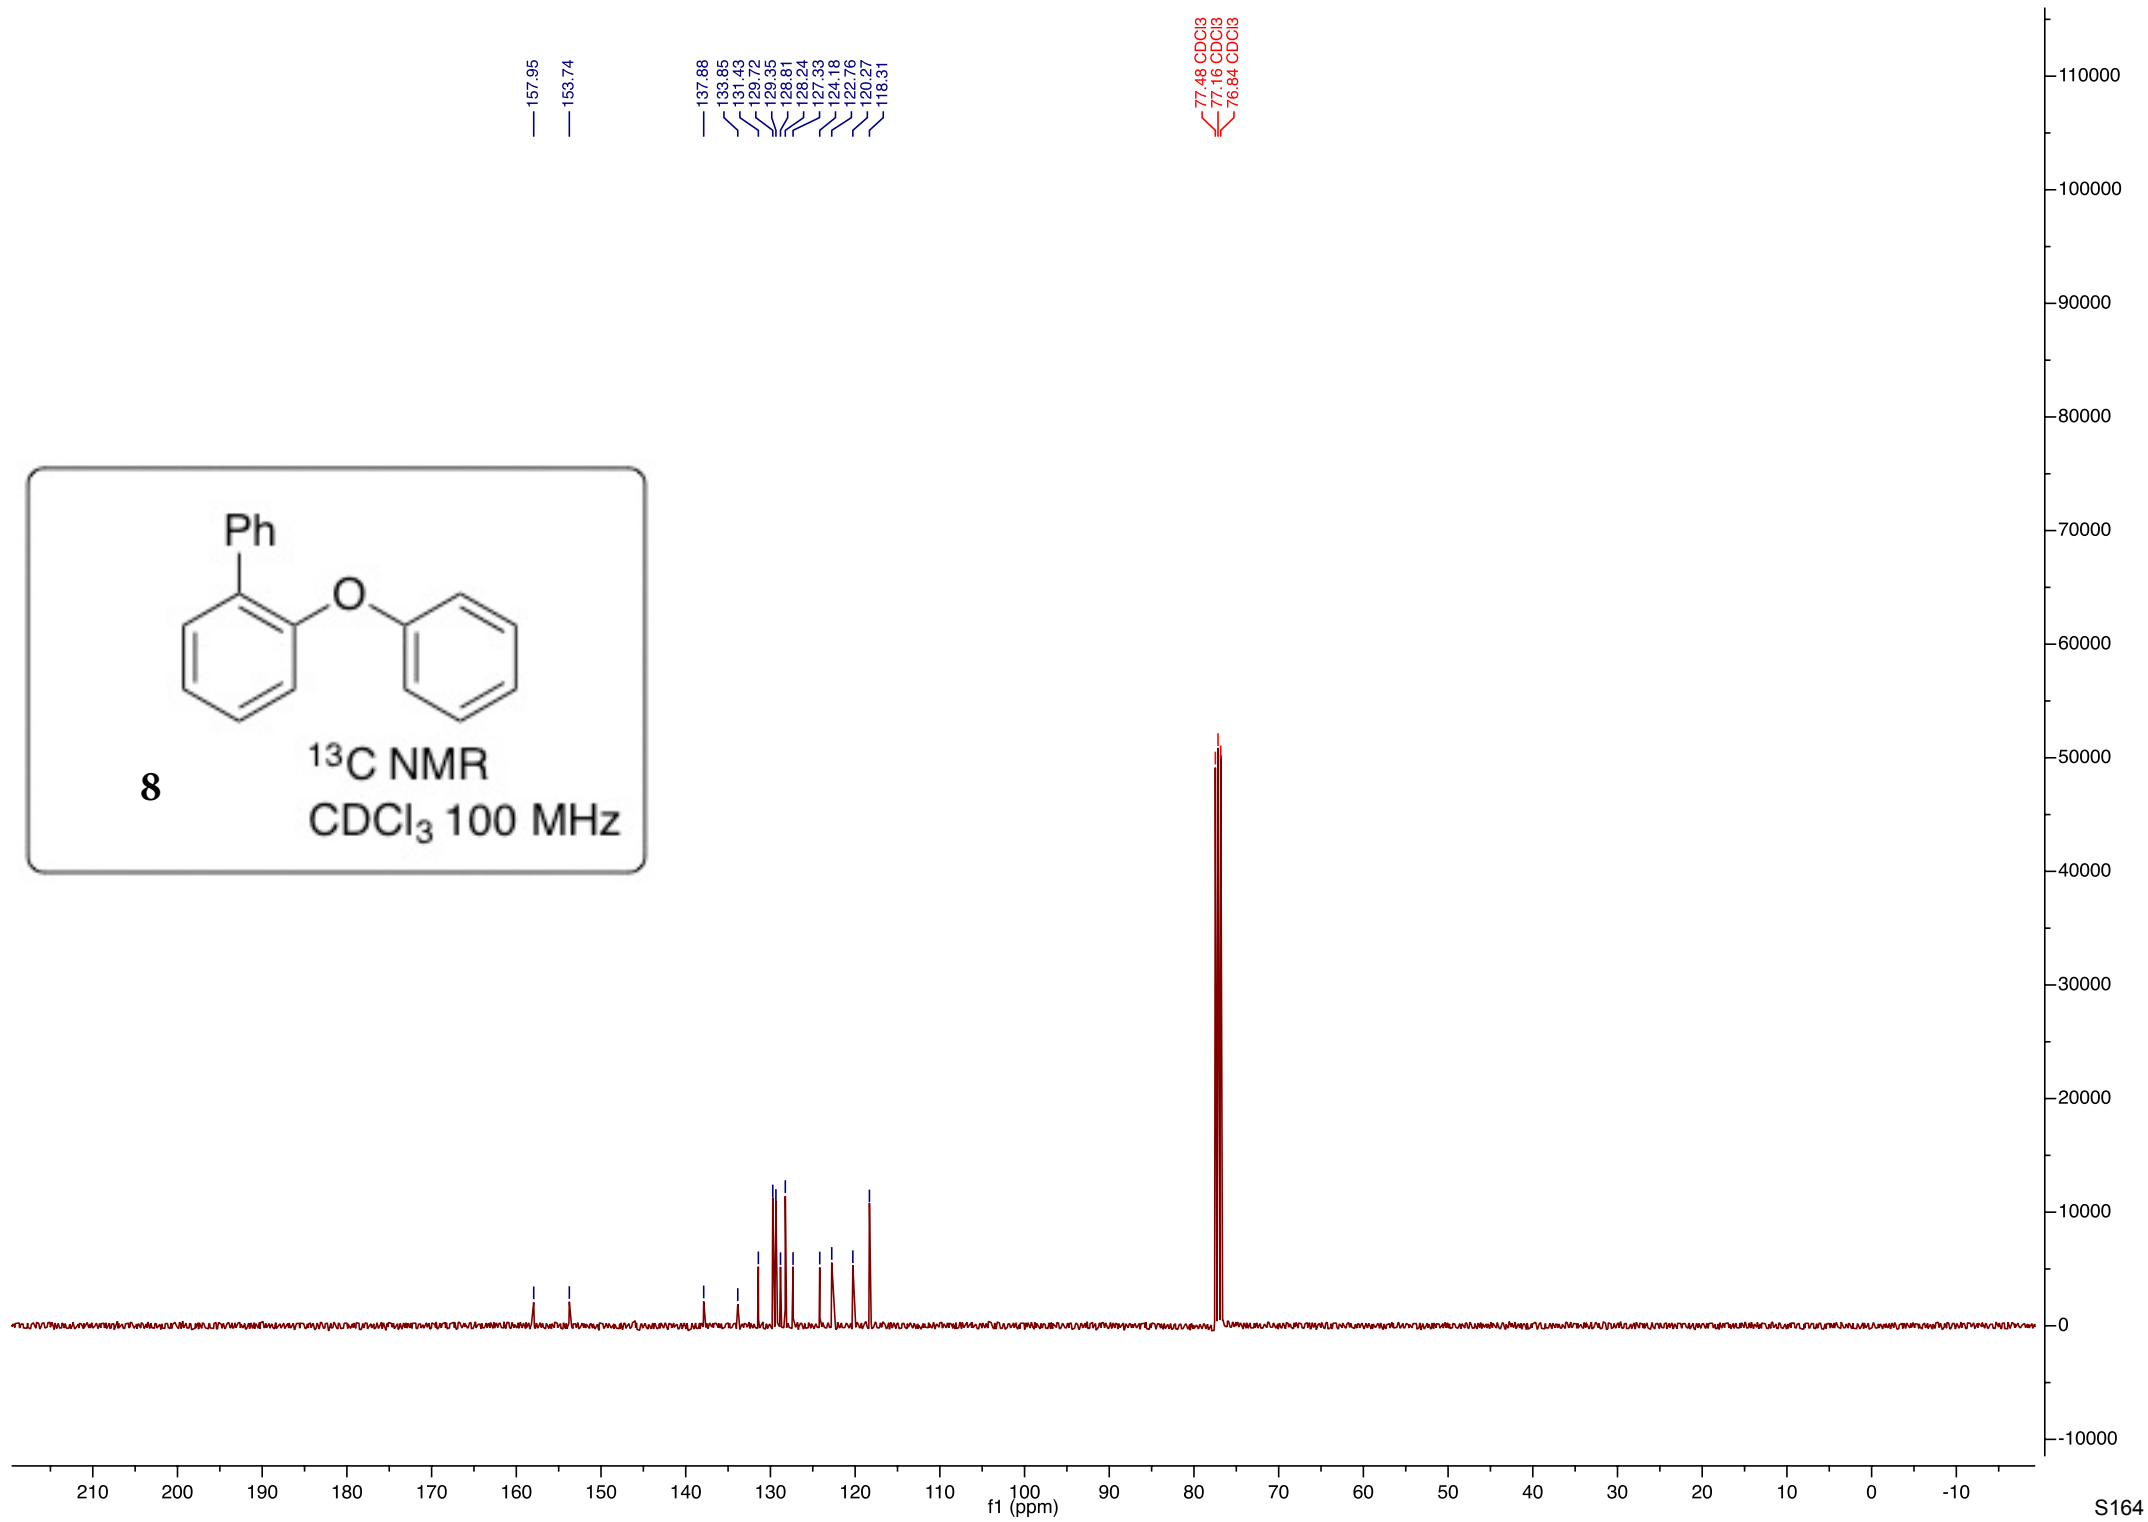

Supplement: CHEM-23-13249-s001.pdf [file CHEM-23-13249-s001.pdf]
